# Supplementary material for: Masting by beech trees predicts the risk of Lyme disease
Source: Parasit Vectors. 2021 Mar 20;14:168. doi: 10.1186/s13071-021-04646-0 (PMC7980658; doi:10.1186/s13071-021-04646-0)
Supplement: Supplementary file 2 — Additional file 2: Table S1. Raw data used for all statistical analyses. [file 13071_2021_4646_MOESM2_ESM.xlsx]

## Sheet: NIP
rank	site.name	site	date	year	year1	site.year.id	DIN	log10.DIN	log10.DIN_1	NIP	NIS	log10.RLB_lag	beech_2	climapT_2	climapT_1	climapT	climapRH_2	climapRH_1	climapRH	climapSD_2	climapSD_1	climapSD	climapPR_2	climapPR_1	climapPR	pitouT_2	pitouT_1	pitouT	pitouRH_2	pitouRH_1	pitouRH	pitouSD_2	pitouSD_1	pitouSD
1	low	1	2006-02-27	2006	3	3	4334.9	3.63698	3.49797	17.1598	0	1.86332	5	9.27	9.07	9.75	73.7923	73.56	74.7965	2.79504	2.8775	2.84908	3.09906	2.21787	3.55622	15.3317	16.7825	16.4417	54.8742	55.5608	52.6833	7.51357	8.22772	7.64561
2	low	1	2006-02-27	2006	3	3	4334.9	3.63698	3.49797	17.1598	1	1.86332	5	9.27	9.07	9.75	73.7923	73.56	74.7965	2.79504	2.8775	2.84908	3.09906	2.21787	3.55622	15.3317	16.7825	16.4417	54.8742	55.5608	52.6833	7.51357	8.22772	7.64561
3	low	1	2006-02-27	2006	3	3	4334.9	3.63698	3.49797	17.1598	0	1.86332	5	9.27	9.07	9.75	73.7923	73.56	74.7965	2.79504	2.8775	2.84908	3.09906	2.21787	3.55622	15.3317	16.7825	16.4417	54.8742	55.5608	52.6833	7.51357	8.22772	7.64561
4	low	1	2006-03-27	2006	3	3	4334.9	3.63698	3.49797	17.1598	1	2.04922	5	9.27	9.07	9.75	73.7923	73.56	74.7965	2.79504	2.8775	2.84908	3.09906	2.21787	3.55622	15.3317	16.7825	16.4417	54.8742	55.5608	52.6833	7.51357	8.22772	7.64561
5	low	1	2006-03-27	2006	3	3	4334.9	3.63698	3.49797	17.1598	0	2.04922	5	9.27	9.07	9.75	73.7923	73.56	74.7965	2.79504	2.8775	2.84908	3.09906	2.21787	3.55622	15.3317	16.7825	16.4417	54.8742	55.5608	52.6833	7.51357	8.22772	7.64561
6	low	1	2006-03-27	2006	3	3	4334.9	3.63698	3.49797	17.1598	0	2.04922	5	9.27	9.07	9.75	73.7923	73.56	74.7965	2.79504	2.8775	2.84908	3.09906	2.21787	3.55622	15.3317	16.7825	16.4417	54.8742	55.5608	52.6833	7.51357	8.22772	7.64561
7	low	1	2006-03-27	2006	3	3	4334.9	3.63698	3.49797	17.1598	1	2.04922	5	9.27	9.07	9.75	73.7923	73.56	74.7965	2.79504	2.8775	2.84908	3.09906	2.21787	3.55622	15.3317	16.7825	16.4417	54.8742	55.5608	52.6833	7.51357	8.22772	7.64561
8	low	1	2006-03-27	2006	3	3	4334.9	3.63698	3.49797	17.1598	0	2.04922	5	9.27	9.07	9.75	73.7923	73.56	74.7965	2.79504	2.8775	2.84908	3.09906	2.21787	3.55622	15.3317	16.7825	16.4417	54.8742	55.5608	52.6833	7.51357	8.22772	7.64561
9	low	1	2006-03-27	2006	3	3	4334.9	3.63698	3.49797	17.1598	0	2.04922	5	9.27	9.07	9.75	73.7923	73.56	74.7965	2.79504	2.8775	2.84908	3.09906	2.21787	3.55622	15.3317	16.7825	16.4417	54.8742	55.5608	52.6833	7.51357	8.22772	7.64561
10	low	1	2006-03-27	2006	3	3	4334.9	3.63698	3.49797	17.1598	0	2.04922	5	9.27	9.07	9.75	73.7923	73.56	74.7965	2.79504	2.8775	2.84908	3.09906	2.21787	3.55622	15.3317	16.7825	16.4417	54.8742	55.5608	52.6833	7.51357	8.22772	7.64561
11	low	1	2006-03-27	2006	3	3	4334.9	3.63698	3.49797	17.1598	0	2.04922	5	9.27	9.07	9.75	73.7923	73.56	74.7965	2.79504	2.8775	2.84908	3.09906	2.21787	3.55622	15.3317	16.7825	16.4417	54.8742	55.5608	52.6833	7.51357	8.22772	7.64561
12	low	1	2006-03-27	2006	3	3	4334.9	3.63698	3.49797	17.1598	1	2.04922	5	9.27	9.07	9.75	73.7923	73.56	74.7965	2.79504	2.8775	2.84908	3.09906	2.21787	3.55622	15.3317	16.7825	16.4417	54.8742	55.5608	52.6833	7.51357	8.22772	7.64561
13	low	1	2006-03-27	2006	3	3	4334.9	3.63698	3.49797	17.1598	0	2.04922	5	9.27	9.07	9.75	73.7923	73.56	74.7965	2.79504	2.8775	2.84908	3.09906	2.21787	3.55622	15.3317	16.7825	16.4417	54.8742	55.5608	52.6833	7.51357	8.22772	7.64561
14	low	1	2006-03-27	2006	3	3	4334.9	3.63698	3.49797	17.1598	1	2.04922	5	9.27	9.07	9.75	73.7923	73.56	74.7965	2.79504	2.8775	2.84908	3.09906	2.21787	3.55622	15.3317	16.7825	16.4417	54.8742	55.5608	52.6833	7.51357	8.22772	7.64561
15	low	1	2006-03-27	2006	3	3	4334.9	3.63698	3.49797	17.1598	0	2.04922	5	9.27	9.07	9.75	73.7923	73.56	74.7965	2.79504	2.8775	2.84908	3.09906	2.21787	3.55622	15.3317	16.7825	16.4417	54.8742	55.5608	52.6833	7.51357	8.22772	7.64561
16	low	1	2006-03-27	2006	3	3	4334.9	3.63698	3.49797	17.1598	0	2.04922	5	9.27	9.07	9.75	73.7923	73.56	74.7965	2.79504	2.8775	2.84908	3.09906	2.21787	3.55622	15.3317	16.7825	16.4417	54.8742	55.5608	52.6833	7.51357	8.22772	7.64561
17	low	1	2006-03-27	2006	3	3	4334.9	3.63698	3.49797	17.1598	0	2.04922	5	9.27	9.07	9.75	73.7923	73.56	74.7965	2.79504	2.8775	2.84908	3.09906	2.21787	3.55622	15.3317	16.7825	16.4417	54.8742	55.5608	52.6833	7.51357	8.22772	7.64561
18	low	1	2006-03-27	2006	3	3	4334.9	3.63698	3.49797	17.1598	0	2.04922	5	9.27	9.07	9.75	73.7923	73.56	74.7965	2.79504	2.8775	2.84908	3.09906	2.21787	3.55622	15.3317	16.7825	16.4417	54.8742	55.5608	52.6833	7.51357	8.22772	7.64561
19	low	1	2006-03-27	2006	3	3	4334.9	3.63698	3.49797	17.1598	0	2.04922	5	9.27	9.07	9.75	73.7923	73.56	74.7965	2.79504	2.8775	2.84908	3.09906	2.21787	3.55622	15.3317	16.7825	16.4417	54.8742	55.5608	52.6833	7.51357	8.22772	7.64561
20	low	1	2006-03-27	2006	3	3	4334.9	3.63698	3.49797	17.1598	0	2.04922	5	9.27	9.07	9.75	73.7923	73.56	74.7965	2.79504	2.8775	2.84908	3.09906	2.21787	3.55622	15.3317	16.7825	16.4417	54.8742	55.5608	52.6833	7.51357	8.22772	7.64561
21	low	1	2006-03-27	2006	3	3	4334.9	3.63698	3.49797	17.1598	0	2.04922	5	9.27	9.07	9.75	73.7923	73.56	74.7965	2.79504	2.8775	2.84908	3.09906	2.21787	3.55622	15.3317	16.7825	16.4417	54.8742	55.5608	52.6833	7.51357	8.22772	7.64561
22	low	1	2006-03-27	2006	3	3	4334.9	3.63698	3.49797	17.1598	0	2.04922	5	9.27	9.07	9.75	73.7923	73.56	74.7965	2.79504	2.8775	2.84908	3.09906	2.21787	3.55622	15.3317	16.7825	16.4417	54.8742	55.5608	52.6833	7.51357	8.22772	7.64561
23	low	1	2006-03-27	2006	3	3	4334.9	3.63698	3.49797	17.1598	0	2.04922	5	9.27	9.07	9.75	73.7923	73.56	74.7965	2.79504	2.8775	2.84908	3.09906	2.21787	3.55622	15.3317	16.7825	16.4417	54.8742	55.5608	52.6833	7.51357	8.22772	7.64561
24	low	1	2006-05-02	2006	3	3	4334.9	3.63698	3.49797	17.1598	0	2.80618	5	9.27	9.07	9.75	73.7923	73.56	74.7965	2.79504	2.8775	2.84908	3.09906	2.21787	3.55622	15.3317	16.7825	16.4417	54.8742	55.5608	52.6833	7.51357	8.22772	7.64561
25	low	1	2006-05-02	2006	3	3	4334.9	3.63698	3.49797	17.1598	0	2.80618	5	9.27	9.07	9.75	73.7923	73.56	74.7965	2.79504	2.8775	2.84908	3.09906	2.21787	3.55622	15.3317	16.7825	16.4417	54.8742	55.5608	52.6833	7.51357	8.22772	7.64561
26	low	1	2006-05-02	2006	3	3	4334.9	3.63698	3.49797	17.1598	0	2.80618	5	9.27	9.07	9.75	73.7923	73.56	74.7965	2.79504	2.8775	2.84908	3.09906	2.21787	3.55622	15.3317	16.7825	16.4417	54.8742	55.5608	52.6833	7.51357	8.22772	7.64561
27	low	1	2006-05-02	2006	3	3	4334.9	3.63698	3.49797	17.1598	0	2.80618	5	9.27	9.07	9.75	73.7923	73.56	74.7965	2.79504	2.8775	2.84908	3.09906	2.21787	3.55622	15.3317	16.7825	16.4417	54.8742	55.5608	52.6833	7.51357	8.22772	7.64561
28	low	1	2006-05-02	2006	3	3	4334.9	3.63698	3.49797	17.1598	0	2.80618	5	9.27	9.07	9.75	73.7923	73.56	74.7965	2.79504	2.8775	2.84908	3.09906	2.21787	3.55622	15.3317	16.7825	16.4417	54.8742	55.5608	52.6833	7.51357	8.22772	7.64561
29	low	1	2006-05-02	2006	3	3	4334.9	3.63698	3.49797	17.1598	0	2.80618	5	9.27	9.07	9.75	73.7923	73.56	74.7965	2.79504	2.8775	2.84908	3.09906	2.21787	3.55622	15.3317	16.7825	16.4417	54.8742	55.5608	52.6833	7.51357	8.22772	7.64561
30	low	1	2006-05-02	2006	3	3	4334.9	3.63698	3.49797	17.1598	0	2.80618	5	9.27	9.07	9.75	73.7923	73.56	74.7965	2.79504	2.8775	2.84908	3.09906	2.21787	3.55622	15.3317	16.7825	16.4417	54.8742	55.5608	52.6833	7.51357	8.22772	7.64561
31	low	1	2006-05-02	2006	3	3	4334.9	3.63698	3.49797	17.1598	0	2.80618	5	9.27	9.07	9.75	73.7923	73.56	74.7965	2.79504	2.8775	2.84908	3.09906	2.21787	3.55622	15.3317	16.7825	16.4417	54.8742	55.5608	52.6833	7.51357	8.22772	7.64561
32	low	1	2006-05-02	2006	3	3	4334.9	3.63698	3.49797	17.1598	1	2.80618	5	9.27	9.07	9.75	73.7923	73.56	74.7965	2.79504	2.8775	2.84908	3.09906	2.21787	3.55622	15.3317	16.7825	16.4417	54.8742	55.5608	52.6833	7.51357	8.22772	7.64561
33	low	1	2006-05-02	2006	3	3	4334.9	3.63698	3.49797	17.1598	0	2.80618	5	9.27	9.07	9.75	73.7923	73.56	74.7965	2.79504	2.8775	2.84908	3.09906	2.21787	3.55622	15.3317	16.7825	16.4417	54.8742	55.5608	52.6833	7.51357	8.22772	7.64561
34	low	1	2006-05-02	2006	3	3	4334.9	3.63698	3.49797	17.1598	0	2.80618	5	9.27	9.07	9.75	73.7923	73.56	74.7965	2.79504	2.8775	2.84908	3.09906	2.21787	3.55622	15.3317	16.7825	16.4417	54.8742	55.5608	52.6833	7.51357	8.22772	7.64561
35	low	1	2006-05-02	2006	3	3	4334.9	3.63698	3.49797	17.1598	0	2.80618	5	9.27	9.07	9.75	73.7923	73.56	74.7965	2.79504	2.8775	2.84908	3.09906	2.21787	3.55622	15.3317	16.7825	16.4417	54.8742	55.5608	52.6833	7.51357	8.22772	7.64561
36	low	1	2006-05-02	2006	3	3	4334.9	3.63698	3.49797	17.1598	0	2.80618	5	9.27	9.07	9.75	73.7923	73.56	74.7965	2.79504	2.8775	2.84908	3.09906	2.21787	3.55622	15.3317	16.7825	16.4417	54.8742	55.5608	52.6833	7.51357	8.22772	7.64561
37	low	1	2006-05-02	2006	3	3	4334.9	3.63698	3.49797	17.1598	0	2.80618	5	9.27	9.07	9.75	73.7923	73.56	74.7965	2.79504	2.8775	2.84908	3.09906	2.21787	3.55622	15.3317	16.7825	16.4417	54.8742	55.5608	52.6833	7.51357	8.22772	7.64561
38	low	1	2006-05-02	2006	3	3	4334.9	3.63698	3.49797	17.1598	0	2.80618	5	9.27	9.07	9.75	73.7923	73.56	74.7965	2.79504	2.8775	2.84908	3.09906	2.21787	3.55622	15.3317	16.7825	16.4417	54.8742	55.5608	52.6833	7.51357	8.22772	7.64561
39	low	1	2006-05-02	2006	3	3	4334.9	3.63698	3.49797	17.1598	0	2.80618	5	9.27	9.07	9.75	73.7923	73.56	74.7965	2.79504	2.8775	2.84908	3.09906	2.21787	3.55622	15.3317	16.7825	16.4417	54.8742	55.5608	52.6833	7.51357	8.22772	7.64561
40	low	1	2006-05-02	2006	3	3	4334.9	3.63698	3.49797	17.1598	0	2.80618	5	9.27	9.07	9.75	73.7923	73.56	74.7965	2.79504	2.8775	2.84908	3.09906	2.21787	3.55622	15.3317	16.7825	16.4417	54.8742	55.5608	52.6833	7.51357	8.22772	7.64561
41	low	1	2006-05-02	2006	3	3	4334.9	3.63698	3.49797	17.1598	0	2.80618	5	9.27	9.07	9.75	73.7923	73.56	74.7965	2.79504	2.8775	2.84908	3.09906	2.21787	3.55622	15.3317	16.7825	16.4417	54.8742	55.5608	52.6833	7.51357	8.22772	7.64561
42	low	1	2006-05-02	2006	3	3	4334.9	3.63698	3.49797	17.1598	0	2.80618	5	9.27	9.07	9.75	73.7923	73.56	74.7965	2.79504	2.8775	2.84908	3.09906	2.21787	3.55622	15.3317	16.7825	16.4417	54.8742	55.5608	52.6833	7.51357	8.22772	7.64561
43	low	1	2006-05-02	2006	3	3	4334.9	3.63698	3.49797	17.1598	1	2.80618	5	9.27	9.07	9.75	73.7923	73.56	74.7965	2.79504	2.8775	2.84908	3.09906	2.21787	3.55622	15.3317	16.7825	16.4417	54.8742	55.5608	52.6833	7.51357	8.22772	7.64561
44	low	1	2006-06-07	2006	3	3	4334.9	3.63698	3.49797	17.1598	0	2.80889	5	9.27	9.07	9.75	73.7923	73.56	74.7965	2.79504	2.8775	2.84908	3.09906	2.21787	3.55622	15.3317	16.7825	16.4417	54.8742	55.5608	52.6833	7.51357	8.22772	7.64561
45	low	1	2006-06-07	2006	3	3	4334.9	3.63698	3.49797	17.1598	1	2.80889	5	9.27	9.07	9.75	73.7923	73.56	74.7965	2.79504	2.8775	2.84908	3.09906	2.21787	3.55622	15.3317	16.7825	16.4417	54.8742	55.5608	52.6833	7.51357	8.22772	7.64561
46	low	1	2006-06-07	2006	3	3	4334.9	3.63698	3.49797	17.1598	0	2.80889	5	9.27	9.07	9.75	73.7923	73.56	74.7965	2.79504	2.8775	2.84908	3.09906	2.21787	3.55622	15.3317	16.7825	16.4417	54.8742	55.5608	52.6833	7.51357	8.22772	7.64561
47	low	1	2006-06-07	2006	3	3	4334.9	3.63698	3.49797	17.1598	1	2.80889	5	9.27	9.07	9.75	73.7923	73.56	74.7965	2.79504	2.8775	2.84908	3.09906	2.21787	3.55622	15.3317	16.7825	16.4417	54.8742	55.5608	52.6833	7.51357	8.22772	7.64561
48	low	1	2006-06-07	2006	3	3	4334.9	3.63698	3.49797	17.1598	0	2.80889	5	9.27	9.07	9.75	73.7923	73.56	74.7965	2.79504	2.8775	2.84908	3.09906	2.21787	3.55622	15.3317	16.7825	16.4417	54.8742	55.5608	52.6833	7.51357	8.22772	7.64561
49	low	1	2006-06-07	2006	3	3	4334.9	3.63698	3.49797	17.1598	0	2.80889	5	9.27	9.07	9.75	73.7923	73.56	74.7965	2.79504	2.8775	2.84908	3.09906	2.21787	3.55622	15.3317	16.7825	16.4417	54.8742	55.5608	52.6833	7.51357	8.22772	7.64561
50	low	1	2006-06-07	2006	3	3	4334.9	3.63698	3.49797	17.1598	1	2.80889	5	9.27	9.07	9.75	73.7923	73.56	74.7965	2.79504	2.8775	2.84908	3.09906	2.21787	3.55622	15.3317	16.7825	16.4417	54.8742	55.5608	52.6833	7.51357	8.22772	7.64561
51	low	1	2006-06-07	2006	3	3	4334.9	3.63698	3.49797	17.1598	0	2.80889	5	9.27	9.07	9.75	73.7923	73.56	74.7965	2.79504	2.8775	2.84908	3.09906	2.21787	3.55622	15.3317	16.7825	16.4417	54.8742	55.5608	52.6833	7.51357	8.22772	7.64561
52	low	1	2006-06-07	2006	3	3	4334.9	3.63698	3.49797	17.1598	1	2.80889	5	9.27	9.07	9.75	73.7923	73.56	74.7965	2.79504	2.8775	2.84908	3.09906	2.21787	3.55622	15.3317	16.7825	16.4417	54.8742	55.5608	52.6833	7.51357	8.22772	7.64561
53	low	1	2006-06-07	2006	3	3	4334.9	3.63698	3.49797	17.1598	0	2.80889	5	9.27	9.07	9.75	73.7923	73.56	74.7965	2.79504	2.8775	2.84908	3.09906	2.21787	3.55622	15.3317	16.7825	16.4417	54.8742	55.5608	52.6833	7.51357	8.22772	7.64561
54	low	1	2006-06-07	2006	3	3	4334.9	3.63698	3.49797	17.1598	0	2.80889	5	9.27	9.07	9.75	73.7923	73.56	74.7965	2.79504	2.8775	2.84908	3.09906	2.21787	3.55622	15.3317	16.7825	16.4417	54.8742	55.5608	52.6833	7.51357	8.22772	7.64561
55	low	1	2006-06-07	2006	3	3	4334.9	3.63698	3.49797	17.1598	0	2.80889	5	9.27	9.07	9.75	73.7923	73.56	74.7965	2.79504	2.8775	2.84908	3.09906	2.21787	3.55622	15.3317	16.7825	16.4417	54.8742	55.5608	52.6833	7.51357	8.22772	7.64561
56	low	1	2006-06-07	2006	3	3	4334.9	3.63698	3.49797	17.1598	1	2.80889	5	9.27	9.07	9.75	73.7923	73.56	74.7965	2.79504	2.8775	2.84908	3.09906	2.21787	3.55622	15.3317	16.7825	16.4417	54.8742	55.5608	52.6833	7.51357	8.22772	7.64561
57	low	1	2006-06-07	2006	3	3	4334.9	3.63698	3.49797	17.1598	0	2.80889	5	9.27	9.07	9.75	73.7923	73.56	74.7965	2.79504	2.8775	2.84908	3.09906	2.21787	3.55622	15.3317	16.7825	16.4417	54.8742	55.5608	52.6833	7.51357	8.22772	7.64561
58	low	1	2006-06-07	2006	3	3	4334.9	3.63698	3.49797	17.1598	0	2.80889	5	9.27	9.07	9.75	73.7923	73.56	74.7965	2.79504	2.8775	2.84908	3.09906	2.21787	3.55622	15.3317	16.7825	16.4417	54.8742	55.5608	52.6833	7.51357	8.22772	7.64561
59	low	1	2006-06-07	2006	3	3	4334.9	3.63698	3.49797	17.1598	0	2.80889	5	9.27	9.07	9.75	73.7923	73.56	74.7965	2.79504	2.8775	2.84908	3.09906	2.21787	3.55622	15.3317	16.7825	16.4417	54.8742	55.5608	52.6833	7.51357	8.22772	7.64561
60	low	1	2006-06-07	2006	3	3	4334.9	3.63698	3.49797	17.1598	0	2.80889	5	9.27	9.07	9.75	73.7923	73.56	74.7965	2.79504	2.8775	2.84908	3.09906	2.21787	3.55622	15.3317	16.7825	16.4417	54.8742	55.5608	52.6833	7.51357	8.22772	7.64561
61	low	1	2006-06-07	2006	3	3	4334.9	3.63698	3.49797	17.1598	0	2.80889	5	9.27	9.07	9.75	73.7923	73.56	74.7965	2.79504	2.8775	2.84908	3.09906	2.21787	3.55622	15.3317	16.7825	16.4417	54.8742	55.5608	52.6833	7.51357	8.22772	7.64561
62	low	1	2006-06-07	2006	3	3	4334.9	3.63698	3.49797	17.1598	0	2.80889	5	9.27	9.07	9.75	73.7923	73.56	74.7965	2.79504	2.8775	2.84908	3.09906	2.21787	3.55622	15.3317	16.7825	16.4417	54.8742	55.5608	52.6833	7.51357	8.22772	7.64561
63	low	1	2006-06-07	2006	3	3	4334.9	3.63698	3.49797	17.1598	0	2.80889	5	9.27	9.07	9.75	73.7923	73.56	74.7965	2.79504	2.8775	2.84908	3.09906	2.21787	3.55622	15.3317	16.7825	16.4417	54.8742	55.5608	52.6833	7.51357	8.22772	7.64561
64	low	1	2006-07-03	2006	3	3	4334.9	3.63698	3.49797	17.1598	0	2.80072	5	9.27	9.07	9.75	73.7923	73.56	74.7965	2.79504	2.8775	2.84908	3.09906	2.21787	3.55622	15.3317	16.7825	16.4417	54.8742	55.5608	52.6833	7.51357	8.22772	7.64561
65	low	1	2006-07-03	2006	3	3	4334.9	3.63698	3.49797	17.1598	0	2.80072	5	9.27	9.07	9.75	73.7923	73.56	74.7965	2.79504	2.8775	2.84908	3.09906	2.21787	3.55622	15.3317	16.7825	16.4417	54.8742	55.5608	52.6833	7.51357	8.22772	7.64561
66	low	1	2006-07-03	2006	3	3	4334.9	3.63698	3.49797	17.1598	0	2.80072	5	9.27	9.07	9.75	73.7923	73.56	74.7965	2.79504	2.8775	2.84908	3.09906	2.21787	3.55622	15.3317	16.7825	16.4417	54.8742	55.5608	52.6833	7.51357	8.22772	7.64561
67	low	1	2006-07-03	2006	3	3	4334.9	3.63698	3.49797	17.1598	0	2.80072	5	9.27	9.07	9.75	73.7923	73.56	74.7965	2.79504	2.8775	2.84908	3.09906	2.21787	3.55622	15.3317	16.7825	16.4417	54.8742	55.5608	52.6833	7.51357	8.22772	7.64561
68	low	1	2006-07-03	2006	3	3	4334.9	3.63698	3.49797	17.1598	0	2.80072	5	9.27	9.07	9.75	73.7923	73.56	74.7965	2.79504	2.8775	2.84908	3.09906	2.21787	3.55622	15.3317	16.7825	16.4417	54.8742	55.5608	52.6833	7.51357	8.22772	7.64561
69	low	1	2006-07-03	2006	3	3	4334.9	3.63698	3.49797	17.1598	0	2.80072	5	9.27	9.07	9.75	73.7923	73.56	74.7965	2.79504	2.8775	2.84908	3.09906	2.21787	3.55622	15.3317	16.7825	16.4417	54.8742	55.5608	52.6833	7.51357	8.22772	7.64561
70	low	1	2006-07-03	2006	3	3	4334.9	3.63698	3.49797	17.1598	0	2.80072	5	9.27	9.07	9.75	73.7923	73.56	74.7965	2.79504	2.8775	2.84908	3.09906	2.21787	3.55622	15.3317	16.7825	16.4417	54.8742	55.5608	52.6833	7.51357	8.22772	7.64561
71	low	1	2006-07-03	2006	3	3	4334.9	3.63698	3.49797	17.1598	0	2.80072	5	9.27	9.07	9.75	73.7923	73.56	74.7965	2.79504	2.8775	2.84908	3.09906	2.21787	3.55622	15.3317	16.7825	16.4417	54.8742	55.5608	52.6833	7.51357	8.22772	7.64561
72	low	1	2006-07-03	2006	3	3	4334.9	3.63698	3.49797	17.1598	0	2.80072	5	9.27	9.07	9.75	73.7923	73.56	74.7965	2.79504	2.8775	2.84908	3.09906	2.21787	3.55622	15.3317	16.7825	16.4417	54.8742	55.5608	52.6833	7.51357	8.22772	7.64561
73	low	1	2006-07-03	2006	3	3	4334.9	3.63698	3.49797	17.1598	0	2.80072	5	9.27	9.07	9.75	73.7923	73.56	74.7965	2.79504	2.8775	2.84908	3.09906	2.21787	3.55622	15.3317	16.7825	16.4417	54.8742	55.5608	52.6833	7.51357	8.22772	7.64561
74	low	1	2006-07-03	2006	3	3	4334.9	3.63698	3.49797	17.1598	1	2.80072	5	9.27	9.07	9.75	73.7923	73.56	74.7965	2.79504	2.8775	2.84908	3.09906	2.21787	3.55622	15.3317	16.7825	16.4417	54.8742	55.5608	52.6833	7.51357	8.22772	7.64561
75	low	1	2006-07-03	2006	3	3	4334.9	3.63698	3.49797	17.1598	0	2.80072	5	9.27	9.07	9.75	73.7923	73.56	74.7965	2.79504	2.8775	2.84908	3.09906	2.21787	3.55622	15.3317	16.7825	16.4417	54.8742	55.5608	52.6833	7.51357	8.22772	7.64561
76	low	1	2006-07-03	2006	3	3	4334.9	3.63698	3.49797	17.1598	0	2.80072	5	9.27	9.07	9.75	73.7923	73.56	74.7965	2.79504	2.8775	2.84908	3.09906	2.21787	3.55622	15.3317	16.7825	16.4417	54.8742	55.5608	52.6833	7.51357	8.22772	7.64561
77	low	1	2006-07-03	2006	3	3	4334.9	3.63698	3.49797	17.1598	0	2.80072	5	9.27	9.07	9.75	73.7923	73.56	74.7965	2.79504	2.8775	2.84908	3.09906	2.21787	3.55622	15.3317	16.7825	16.4417	54.8742	55.5608	52.6833	7.51357	8.22772	7.64561
78	low	1	2006-07-03	2006	3	3	4334.9	3.63698	3.49797	17.1598	0	2.80072	5	9.27	9.07	9.75	73.7923	73.56	74.7965	2.79504	2.8775	2.84908	3.09906	2.21787	3.55622	15.3317	16.7825	16.4417	54.8742	55.5608	52.6833	7.51357	8.22772	7.64561
79	low	1	2006-07-03	2006	3	3	4334.9	3.63698	3.49797	17.1598	0	2.80072	5	9.27	9.07	9.75	73.7923	73.56	74.7965	2.79504	2.8775	2.84908	3.09906	2.21787	3.55622	15.3317	16.7825	16.4417	54.8742	55.5608	52.6833	7.51357	8.22772	7.64561
80	low	1	2006-07-03	2006	3	3	4334.9	3.63698	3.49797	17.1598	0	2.80072	5	9.27	9.07	9.75	73.7923	73.56	74.7965	2.79504	2.8775	2.84908	3.09906	2.21787	3.55622	15.3317	16.7825	16.4417	54.8742	55.5608	52.6833	7.51357	8.22772	7.64561
81	low	1	2006-07-03	2006	3	3	4334.9	3.63698	3.49797	17.1598	0	2.80072	5	9.27	9.07	9.75	73.7923	73.56	74.7965	2.79504	2.8775	2.84908	3.09906	2.21787	3.55622	15.3317	16.7825	16.4417	54.8742	55.5608	52.6833	7.51357	8.22772	7.64561
82	low	1	2006-07-03	2006	3	3	4334.9	3.63698	3.49797	17.1598	0	2.80072	5	9.27	9.07	9.75	73.7923	73.56	74.7965	2.79504	2.8775	2.84908	3.09906	2.21787	3.55622	15.3317	16.7825	16.4417	54.8742	55.5608	52.6833	7.51357	8.22772	7.64561
83	low	1	2006-07-03	2006	3	3	4334.9	3.63698	3.49797	17.1598	0	2.80072	5	9.27	9.07	9.75	73.7923	73.56	74.7965	2.79504	2.8775	2.84908	3.09906	2.21787	3.55622	15.3317	16.7825	16.4417	54.8742	55.5608	52.6833	7.51357	8.22772	7.64561
84	low	1	2006-07-27	2006	3	3	4334.9	3.63698	3.49797	17.1598	0	2.33244	5	9.27	9.07	9.75	73.7923	73.56	74.7965	2.79504	2.8775	2.84908	3.09906	2.21787	3.55622	15.3317	16.7825	16.4417	54.8742	55.5608	52.6833	7.51357	8.22772	7.64561
85	low	1	2006-07-27	2006	3	3	4334.9	3.63698	3.49797	17.1598	1	2.33244	5	9.27	9.07	9.75	73.7923	73.56	74.7965	2.79504	2.8775	2.84908	3.09906	2.21787	3.55622	15.3317	16.7825	16.4417	54.8742	55.5608	52.6833	7.51357	8.22772	7.64561
86	low	1	2006-07-27	2006	3	3	4334.9	3.63698	3.49797	17.1598	1	2.33244	5	9.27	9.07	9.75	73.7923	73.56	74.7965	2.79504	2.8775	2.84908	3.09906	2.21787	3.55622	15.3317	16.7825	16.4417	54.8742	55.5608	52.6833	7.51357	8.22772	7.64561
87	low	1	2006-07-27	2006	3	3	4334.9	3.63698	3.49797	17.1598	1	2.33244	5	9.27	9.07	9.75	73.7923	73.56	74.7965	2.79504	2.8775	2.84908	3.09906	2.21787	3.55622	15.3317	16.7825	16.4417	54.8742	55.5608	52.6833	7.51357	8.22772	7.64561
88	low	1	2006-07-27	2006	3	3	4334.9	3.63698	3.49797	17.1598	0	2.33244	5	9.27	9.07	9.75	73.7923	73.56	74.7965	2.79504	2.8775	2.84908	3.09906	2.21787	3.55622	15.3317	16.7825	16.4417	54.8742	55.5608	52.6833	7.51357	8.22772	7.64561
89	low	1	2006-07-27	2006	3	3	4334.9	3.63698	3.49797	17.1598	0	2.33244	5	9.27	9.07	9.75	73.7923	73.56	74.7965	2.79504	2.8775	2.84908	3.09906	2.21787	3.55622	15.3317	16.7825	16.4417	54.8742	55.5608	52.6833	7.51357	8.22772	7.64561
90	low	1	2006-07-27	2006	3	3	4334.9	3.63698	3.49797	17.1598	0	2.33244	5	9.27	9.07	9.75	73.7923	73.56	74.7965	2.79504	2.8775	2.84908	3.09906	2.21787	3.55622	15.3317	16.7825	16.4417	54.8742	55.5608	52.6833	7.51357	8.22772	7.64561
91	low	1	2006-07-27	2006	3	3	4334.9	3.63698	3.49797	17.1598	0	2.33244	5	9.27	9.07	9.75	73.7923	73.56	74.7965	2.79504	2.8775	2.84908	3.09906	2.21787	3.55622	15.3317	16.7825	16.4417	54.8742	55.5608	52.6833	7.51357	8.22772	7.64561
92	low	1	2006-07-27	2006	3	3	4334.9	3.63698	3.49797	17.1598	1	2.33244	5	9.27	9.07	9.75	73.7923	73.56	74.7965	2.79504	2.8775	2.84908	3.09906	2.21787	3.55622	15.3317	16.7825	16.4417	54.8742	55.5608	52.6833	7.51357	8.22772	7.64561
93	low	1	2006-07-27	2006	3	3	4334.9	3.63698	3.49797	17.1598	1	2.33244	5	9.27	9.07	9.75	73.7923	73.56	74.7965	2.79504	2.8775	2.84908	3.09906	2.21787	3.55622	15.3317	16.7825	16.4417	54.8742	55.5608	52.6833	7.51357	8.22772	7.64561
94	low	1	2006-07-27	2006	3	3	4334.9	3.63698	3.49797	17.1598	0	2.33244	5	9.27	9.07	9.75	73.7923	73.56	74.7965	2.79504	2.8775	2.84908	3.09906	2.21787	3.55622	15.3317	16.7825	16.4417	54.8742	55.5608	52.6833	7.51357	8.22772	7.64561
95	low	1	2006-07-27	2006	3	3	4334.9	3.63698	3.49797	17.1598	0	2.33244	5	9.27	9.07	9.75	73.7923	73.56	74.7965	2.79504	2.8775	2.84908	3.09906	2.21787	3.55622	15.3317	16.7825	16.4417	54.8742	55.5608	52.6833	7.51357	8.22772	7.64561
96	low	1	2006-07-27	2006	3	3	4334.9	3.63698	3.49797	17.1598	0	2.33244	5	9.27	9.07	9.75	73.7923	73.56	74.7965	2.79504	2.8775	2.84908	3.09906	2.21787	3.55622	15.3317	16.7825	16.4417	54.8742	55.5608	52.6833	7.51357	8.22772	7.64561
97	low	1	2006-07-27	2006	3	3	4334.9	3.63698	3.49797	17.1598	0	2.33244	5	9.27	9.07	9.75	73.7923	73.56	74.7965	2.79504	2.8775	2.84908	3.09906	2.21787	3.55622	15.3317	16.7825	16.4417	54.8742	55.5608	52.6833	7.51357	8.22772	7.64561
98	low	1	2006-07-27	2006	3	3	4334.9	3.63698	3.49797	17.1598	0	2.33244	5	9.27	9.07	9.75	73.7923	73.56	74.7965	2.79504	2.8775	2.84908	3.09906	2.21787	3.55622	15.3317	16.7825	16.4417	54.8742	55.5608	52.6833	7.51357	8.22772	7.64561
99	low	1	2006-07-27	2006	3	3	4334.9	3.63698	3.49797	17.1598	0	2.33244	5	9.27	9.07	9.75	73.7923	73.56	74.7965	2.79504	2.8775	2.84908	3.09906	2.21787	3.55622	15.3317	16.7825	16.4417	54.8742	55.5608	52.6833	7.51357	8.22772	7.64561
100	low	1	2006-07-27	2006	3	3	4334.9	3.63698	3.49797	17.1598	0	2.33244	5	9.27	9.07	9.75	73.7923	73.56	74.7965	2.79504	2.8775	2.84908	3.09906	2.21787	3.55622	15.3317	16.7825	16.4417	54.8742	55.5608	52.6833	7.51357	8.22772	7.64561
101	low	1	2006-07-27	2006	3	3	4334.9	3.63698	3.49797	17.1598	0	2.33244	5	9.27	9.07	9.75	73.7923	73.56	74.7965	2.79504	2.8775	2.84908	3.09906	2.21787	3.55622	15.3317	16.7825	16.4417	54.8742	55.5608	52.6833	7.51357	8.22772	7.64561
102	low	1	2006-07-27	2006	3	3	4334.9	3.63698	3.49797	17.1598	0	2.33244	5	9.27	9.07	9.75	73.7923	73.56	74.7965	2.79504	2.8775	2.84908	3.09906	2.21787	3.55622	15.3317	16.7825	16.4417	54.8742	55.5608	52.6833	7.51357	8.22772	7.64561
103	low	1	2006-07-27	2006	3	3	4334.9	3.63698	3.49797	17.1598	0	2.33244	5	9.27	9.07	9.75	73.7923	73.56	74.7965	2.79504	2.8775	2.84908	3.09906	2.21787	3.55622	15.3317	16.7825	16.4417	54.8742	55.5608	52.6833	7.51357	8.22772	7.64561
104	low	1	2006-09-01	2006	3	3	4334.9	3.63698	3.49797	17.1598	0	2.3075	5	9.27	9.07	9.75	73.7923	73.56	74.7965	2.79504	2.8775	2.84908	3.09906	2.21787	3.55622	15.3317	16.7825	16.4417	54.8742	55.5608	52.6833	7.51357	8.22772	7.64561
105	low	1	2006-09-01	2006	3	3	4334.9	3.63698	3.49797	17.1598	0	2.3075	5	9.27	9.07	9.75	73.7923	73.56	74.7965	2.79504	2.8775	2.84908	3.09906	2.21787	3.55622	15.3317	16.7825	16.4417	54.8742	55.5608	52.6833	7.51357	8.22772	7.64561
106	low	1	2006-09-01	2006	3	3	4334.9	3.63698	3.49797	17.1598	0	2.3075	5	9.27	9.07	9.75	73.7923	73.56	74.7965	2.79504	2.8775	2.84908	3.09906	2.21787	3.55622	15.3317	16.7825	16.4417	54.8742	55.5608	52.6833	7.51357	8.22772	7.64561
107	low	1	2006-09-01	2006	3	3	4334.9	3.63698	3.49797	17.1598	0	2.3075	5	9.27	9.07	9.75	73.7923	73.56	74.7965	2.79504	2.8775	2.84908	3.09906	2.21787	3.55622	15.3317	16.7825	16.4417	54.8742	55.5608	52.6833	7.51357	8.22772	7.64561
108	low	1	2006-09-01	2006	3	3	4334.9	3.63698	3.49797	17.1598	0	2.3075	5	9.27	9.07	9.75	73.7923	73.56	74.7965	2.79504	2.8775	2.84908	3.09906	2.21787	3.55622	15.3317	16.7825	16.4417	54.8742	55.5608	52.6833	7.51357	8.22772	7.64561
109	low	1	2006-09-01	2006	3	3	4334.9	3.63698	3.49797	17.1598	0	2.3075	5	9.27	9.07	9.75	73.7923	73.56	74.7965	2.79504	2.8775	2.84908	3.09906	2.21787	3.55622	15.3317	16.7825	16.4417	54.8742	55.5608	52.6833	7.51357	8.22772	7.64561
110	low	1	2006-09-01	2006	3	3	4334.9	3.63698	3.49797	17.1598	1	2.3075	5	9.27	9.07	9.75	73.7923	73.56	74.7965	2.79504	2.8775	2.84908	3.09906	2.21787	3.55622	15.3317	16.7825	16.4417	54.8742	55.5608	52.6833	7.51357	8.22772	7.64561
111	low	1	2006-09-01	2006	3	3	4334.9	3.63698	3.49797	17.1598	0	2.3075	5	9.27	9.07	9.75	73.7923	73.56	74.7965	2.79504	2.8775	2.84908	3.09906	2.21787	3.55622	15.3317	16.7825	16.4417	54.8742	55.5608	52.6833	7.51357	8.22772	7.64561
112	low	1	2006-09-01	2006	3	3	4334.9	3.63698	3.49797	17.1598	0	2.3075	5	9.27	9.07	9.75	73.7923	73.56	74.7965	2.79504	2.8775	2.84908	3.09906	2.21787	3.55622	15.3317	16.7825	16.4417	54.8742	55.5608	52.6833	7.51357	8.22772	7.64561
113	low	1	2006-09-01	2006	3	3	4334.9	3.63698	3.49797	17.1598	0	2.3075	5	9.27	9.07	9.75	73.7923	73.56	74.7965	2.79504	2.8775	2.84908	3.09906	2.21787	3.55622	15.3317	16.7825	16.4417	54.8742	55.5608	52.6833	7.51357	8.22772	7.64561
114	low	1	2006-09-01	2006	3	3	4334.9	3.63698	3.49797	17.1598	0	2.3075	5	9.27	9.07	9.75	73.7923	73.56	74.7965	2.79504	2.8775	2.84908	3.09906	2.21787	3.55622	15.3317	16.7825	16.4417	54.8742	55.5608	52.6833	7.51357	8.22772	7.64561
115	low	1	2006-09-01	2006	3	3	4334.9	3.63698	3.49797	17.1598	0	2.3075	5	9.27	9.07	9.75	73.7923	73.56	74.7965	2.79504	2.8775	2.84908	3.09906	2.21787	3.55622	15.3317	16.7825	16.4417	54.8742	55.5608	52.6833	7.51357	8.22772	7.64561
116	low	1	2006-09-01	2006	3	3	4334.9	3.63698	3.49797	17.1598	0	2.3075	5	9.27	9.07	9.75	73.7923	73.56	74.7965	2.79504	2.8775	2.84908	3.09906	2.21787	3.55622	15.3317	16.7825	16.4417	54.8742	55.5608	52.6833	7.51357	8.22772	7.64561
117	low	1	2006-09-01	2006	3	3	4334.9	3.63698	3.49797	17.1598	0	2.3075	5	9.27	9.07	9.75	73.7923	73.56	74.7965	2.79504	2.8775	2.84908	3.09906	2.21787	3.55622	15.3317	16.7825	16.4417	54.8742	55.5608	52.6833	7.51357	8.22772	7.64561
118	low	1	2006-09-01	2006	3	3	4334.9	3.63698	3.49797	17.1598	0	2.3075	5	9.27	9.07	9.75	73.7923	73.56	74.7965	2.79504	2.8775	2.84908	3.09906	2.21787	3.55622	15.3317	16.7825	16.4417	54.8742	55.5608	52.6833	7.51357	8.22772	7.64561
119	low	1	2006-09-01	2006	3	3	4334.9	3.63698	3.49797	17.1598	0	2.3075	5	9.27	9.07	9.75	73.7923	73.56	74.7965	2.79504	2.8775	2.84908	3.09906	2.21787	3.55622	15.3317	16.7825	16.4417	54.8742	55.5608	52.6833	7.51357	8.22772	7.64561
120	low	1	2006-09-01	2006	3	3	4334.9	3.63698	3.49797	17.1598	0	2.3075	5	9.27	9.07	9.75	73.7923	73.56	74.7965	2.79504	2.8775	2.84908	3.09906	2.21787	3.55622	15.3317	16.7825	16.4417	54.8742	55.5608	52.6833	7.51357	8.22772	7.64561
121	low	1	2006-09-01	2006	3	3	4334.9	3.63698	3.49797	17.1598	0	2.3075	5	9.27	9.07	9.75	73.7923	73.56	74.7965	2.79504	2.8775	2.84908	3.09906	2.21787	3.55622	15.3317	16.7825	16.4417	54.8742	55.5608	52.6833	7.51357	8.22772	7.64561
122	low	1	2006-09-01	2006	3	3	4334.9	3.63698	3.49797	17.1598	0	2.3075	5	9.27	9.07	9.75	73.7923	73.56	74.7965	2.79504	2.8775	2.84908	3.09906	2.21787	3.55622	15.3317	16.7825	16.4417	54.8742	55.5608	52.6833	7.51357	8.22772	7.64561
123	low	1	2006-09-01	2006	3	3	4334.9	3.63698	3.49797	17.1598	0	2.3075	5	9.27	9.07	9.75	73.7923	73.56	74.7965	2.79504	2.8775	2.84908	3.09906	2.21787	3.55622	15.3317	16.7825	16.4417	54.8742	55.5608	52.6833	7.51357	8.22772	7.64561
124	low	1	2006-09-29	2006	3	3	4334.9	3.63698	3.49797	17.1598	1	2.30103	5	9.27	9.07	9.75	73.7923	73.56	74.7965	2.79504	2.8775	2.84908	3.09906	2.21787	3.55622	15.3317	16.7825	16.4417	54.8742	55.5608	52.6833	7.51357	8.22772	7.64561
125	low	1	2006-09-29	2006	3	3	4334.9	3.63698	3.49797	17.1598	0	2.30103	5	9.27	9.07	9.75	73.7923	73.56	74.7965	2.79504	2.8775	2.84908	3.09906	2.21787	3.55622	15.3317	16.7825	16.4417	54.8742	55.5608	52.6833	7.51357	8.22772	7.64561
126	low	1	2006-09-29	2006	3	3	4334.9	3.63698	3.49797	17.1598	0	2.30103	5	9.27	9.07	9.75	73.7923	73.56	74.7965	2.79504	2.8775	2.84908	3.09906	2.21787	3.55622	15.3317	16.7825	16.4417	54.8742	55.5608	52.6833	7.51357	8.22772	7.64561
127	low	1	2006-09-29	2006	3	3	4334.9	3.63698	3.49797	17.1598	0	2.30103	5	9.27	9.07	9.75	73.7923	73.56	74.7965	2.79504	2.8775	2.84908	3.09906	2.21787	3.55622	15.3317	16.7825	16.4417	54.8742	55.5608	52.6833	7.51357	8.22772	7.64561
128	low	1	2006-09-29	2006	3	3	4334.9	3.63698	3.49797	17.1598	0	2.30103	5	9.27	9.07	9.75	73.7923	73.56	74.7965	2.79504	2.8775	2.84908	3.09906	2.21787	3.55622	15.3317	16.7825	16.4417	54.8742	55.5608	52.6833	7.51357	8.22772	7.64561
129	low	1	2006-09-29	2006	3	3	4334.9	3.63698	3.49797	17.1598	0	2.30103	5	9.27	9.07	9.75	73.7923	73.56	74.7965	2.79504	2.8775	2.84908	3.09906	2.21787	3.55622	15.3317	16.7825	16.4417	54.8742	55.5608	52.6833	7.51357	8.22772	7.64561
130	low	1	2006-09-29	2006	3	3	4334.9	3.63698	3.49797	17.1598	0	2.30103	5	9.27	9.07	9.75	73.7923	73.56	74.7965	2.79504	2.8775	2.84908	3.09906	2.21787	3.55622	15.3317	16.7825	16.4417	54.8742	55.5608	52.6833	7.51357	8.22772	7.64561
131	low	1	2006-09-29	2006	3	3	4334.9	3.63698	3.49797	17.1598	0	2.30103	5	9.27	9.07	9.75	73.7923	73.56	74.7965	2.79504	2.8775	2.84908	3.09906	2.21787	3.55622	15.3317	16.7825	16.4417	54.8742	55.5608	52.6833	7.51357	8.22772	7.64561
132	low	1	2006-09-29	2006	3	3	4334.9	3.63698	3.49797	17.1598	0	2.30103	5	9.27	9.07	9.75	73.7923	73.56	74.7965	2.79504	2.8775	2.84908	3.09906	2.21787	3.55622	15.3317	16.7825	16.4417	54.8742	55.5608	52.6833	7.51357	8.22772	7.64561
133	low	1	2006-09-29	2006	3	3	4334.9	3.63698	3.49797	17.1598	1	2.30103	5	9.27	9.07	9.75	73.7923	73.56	74.7965	2.79504	2.8775	2.84908	3.09906	2.21787	3.55622	15.3317	16.7825	16.4417	54.8742	55.5608	52.6833	7.51357	8.22772	7.64561
134	low	1	2006-09-29	2006	3	3	4334.9	3.63698	3.49797	17.1598	1	2.30103	5	9.27	9.07	9.75	73.7923	73.56	74.7965	2.79504	2.8775	2.84908	3.09906	2.21787	3.55622	15.3317	16.7825	16.4417	54.8742	55.5608	52.6833	7.51357	8.22772	7.64561
135	low	1	2006-09-29	2006	3	3	4334.9	3.63698	3.49797	17.1598	0	2.30103	5	9.27	9.07	9.75	73.7923	73.56	74.7965	2.79504	2.8775	2.84908	3.09906	2.21787	3.55622	15.3317	16.7825	16.4417	54.8742	55.5608	52.6833	7.51357	8.22772	7.64561
136	low	1	2006-09-29	2006	3	3	4334.9	3.63698	3.49797	17.1598	0	2.30103	5	9.27	9.07	9.75	73.7923	73.56	74.7965	2.79504	2.8775	2.84908	3.09906	2.21787	3.55622	15.3317	16.7825	16.4417	54.8742	55.5608	52.6833	7.51357	8.22772	7.64561
137	low	1	2006-09-29	2006	3	3	4334.9	3.63698	3.49797	17.1598	0	2.30103	5	9.27	9.07	9.75	73.7923	73.56	74.7965	2.79504	2.8775	2.84908	3.09906	2.21787	3.55622	15.3317	16.7825	16.4417	54.8742	55.5608	52.6833	7.51357	8.22772	7.64561
138	low	1	2006-09-29	2006	3	3	4334.9	3.63698	3.49797	17.1598	0	2.30103	5	9.27	9.07	9.75	73.7923	73.56	74.7965	2.79504	2.8775	2.84908	3.09906	2.21787	3.55622	15.3317	16.7825	16.4417	54.8742	55.5608	52.6833	7.51357	8.22772	7.64561
139	low	1	2006-09-29	2006	3	3	4334.9	3.63698	3.49797	17.1598	0	2.30103	5	9.27	9.07	9.75	73.7923	73.56	74.7965	2.79504	2.8775	2.84908	3.09906	2.21787	3.55622	15.3317	16.7825	16.4417	54.8742	55.5608	52.6833	7.51357	8.22772	7.64561
140	low	1	2006-09-29	2006	3	3	4334.9	3.63698	3.49797	17.1598	0	2.30103	5	9.27	9.07	9.75	73.7923	73.56	74.7965	2.79504	2.8775	2.84908	3.09906	2.21787	3.55622	15.3317	16.7825	16.4417	54.8742	55.5608	52.6833	7.51357	8.22772	7.64561
141	low	1	2006-09-29	2006	3	3	4334.9	3.63698	3.49797	17.1598	0	2.30103	5	9.27	9.07	9.75	73.7923	73.56	74.7965	2.79504	2.8775	2.84908	3.09906	2.21787	3.55622	15.3317	16.7825	16.4417	54.8742	55.5608	52.6833	7.51357	8.22772	7.64561
142	low	1	2006-09-29	2006	3	3	4334.9	3.63698	3.49797	17.1598	1	2.30103	5	9.27	9.07	9.75	73.7923	73.56	74.7965	2.79504	2.8775	2.84908	3.09906	2.21787	3.55622	15.3317	16.7825	16.4417	54.8742	55.5608	52.6833	7.51357	8.22772	7.64561
143	low	1	2006-09-29	2006	3	3	4334.9	3.63698	3.49797	17.1598	1	2.30103	5	9.27	9.07	9.75	73.7923	73.56	74.7965	2.79504	2.8775	2.84908	3.09906	2.21787	3.55622	15.3317	16.7825	16.4417	54.8742	55.5608	52.6833	7.51357	8.22772	7.64561
144	low	1	2006-10-27	2006	3	3	4334.9	3.63698	3.49797	17.1598	0	2.25768	5	9.27	9.07	9.75	73.7923	73.56	74.7965	2.79504	2.8775	2.84908	3.09906	2.21787	3.55622	15.3317	16.7825	16.4417	54.8742	55.5608	52.6833	7.51357	8.22772	7.64561
145	low	1	2006-10-27	2006	3	3	4334.9	3.63698	3.49797	17.1598	0	2.25768	5	9.27	9.07	9.75	73.7923	73.56	74.7965	2.79504	2.8775	2.84908	3.09906	2.21787	3.55622	15.3317	16.7825	16.4417	54.8742	55.5608	52.6833	7.51357	8.22772	7.64561
146	low	1	2006-10-27	2006	3	3	4334.9	3.63698	3.49797	17.1598	0	2.25768	5	9.27	9.07	9.75	73.7923	73.56	74.7965	2.79504	2.8775	2.84908	3.09906	2.21787	3.55622	15.3317	16.7825	16.4417	54.8742	55.5608	52.6833	7.51357	8.22772	7.64561
147	low	1	2006-10-27	2006	3	3	4334.9	3.63698	3.49797	17.1598	0	2.25768	5	9.27	9.07	9.75	73.7923	73.56	74.7965	2.79504	2.8775	2.84908	3.09906	2.21787	3.55622	15.3317	16.7825	16.4417	54.8742	55.5608	52.6833	7.51357	8.22772	7.64561
148	low	1	2006-10-27	2006	3	3	4334.9	3.63698	3.49797	17.1598	1	2.25768	5	9.27	9.07	9.75	73.7923	73.56	74.7965	2.79504	2.8775	2.84908	3.09906	2.21787	3.55622	15.3317	16.7825	16.4417	54.8742	55.5608	52.6833	7.51357	8.22772	7.64561
149	low	1	2006-10-27	2006	3	3	4334.9	3.63698	3.49797	17.1598	1	2.25768	5	9.27	9.07	9.75	73.7923	73.56	74.7965	2.79504	2.8775	2.84908	3.09906	2.21787	3.55622	15.3317	16.7825	16.4417	54.8742	55.5608	52.6833	7.51357	8.22772	7.64561
150	low	1	2006-10-27	2006	3	3	4334.9	3.63698	3.49797	17.1598	0	2.25768	5	9.27	9.07	9.75	73.7923	73.56	74.7965	2.79504	2.8775	2.84908	3.09906	2.21787	3.55622	15.3317	16.7825	16.4417	54.8742	55.5608	52.6833	7.51357	8.22772	7.64561
151	low	1	2006-10-27	2006	3	3	4334.9	3.63698	3.49797	17.1598	0	2.25768	5	9.27	9.07	9.75	73.7923	73.56	74.7965	2.79504	2.8775	2.84908	3.09906	2.21787	3.55622	15.3317	16.7825	16.4417	54.8742	55.5608	52.6833	7.51357	8.22772	7.64561
152	low	1	2006-10-27	2006	3	3	4334.9	3.63698	3.49797	17.1598	0	2.25768	5	9.27	9.07	9.75	73.7923	73.56	74.7965	2.79504	2.8775	2.84908	3.09906	2.21787	3.55622	15.3317	16.7825	16.4417	54.8742	55.5608	52.6833	7.51357	8.22772	7.64561
153	low	1	2006-10-27	2006	3	3	4334.9	3.63698	3.49797	17.1598	0	2.25768	5	9.27	9.07	9.75	73.7923	73.56	74.7965	2.79504	2.8775	2.84908	3.09906	2.21787	3.55622	15.3317	16.7825	16.4417	54.8742	55.5608	52.6833	7.51357	8.22772	7.64561
154	low	1	2006-10-27	2006	3	3	4334.9	3.63698	3.49797	17.1598	0	2.25768	5	9.27	9.07	9.75	73.7923	73.56	74.7965	2.79504	2.8775	2.84908	3.09906	2.21787	3.55622	15.3317	16.7825	16.4417	54.8742	55.5608	52.6833	7.51357	8.22772	7.64561
155	low	1	2006-10-27	2006	3	3	4334.9	3.63698	3.49797	17.1598	0	2.25768	5	9.27	9.07	9.75	73.7923	73.56	74.7965	2.79504	2.8775	2.84908	3.09906	2.21787	3.55622	15.3317	16.7825	16.4417	54.8742	55.5608	52.6833	7.51357	8.22772	7.64561
156	low	1	2006-10-27	2006	3	3	4334.9	3.63698	3.49797	17.1598	0	2.25768	5	9.27	9.07	9.75	73.7923	73.56	74.7965	2.79504	2.8775	2.84908	3.09906	2.21787	3.55622	15.3317	16.7825	16.4417	54.8742	55.5608	52.6833	7.51357	8.22772	7.64561
157	low	1	2006-10-27	2006	3	3	4334.9	3.63698	3.49797	17.1598	0	2.25768	5	9.27	9.07	9.75	73.7923	73.56	74.7965	2.79504	2.8775	2.84908	3.09906	2.21787	3.55622	15.3317	16.7825	16.4417	54.8742	55.5608	52.6833	7.51357	8.22772	7.64561
158	low	1	2006-10-27	2006	3	3	4334.9	3.63698	3.49797	17.1598	1	2.25768	5	9.27	9.07	9.75	73.7923	73.56	74.7965	2.79504	2.8775	2.84908	3.09906	2.21787	3.55622	15.3317	16.7825	16.4417	54.8742	55.5608	52.6833	7.51357	8.22772	7.64561
159	low	1	2006-10-27	2006	3	3	4334.9	3.63698	3.49797	17.1598	0	2.25768	5	9.27	9.07	9.75	73.7923	73.56	74.7965	2.79504	2.8775	2.84908	3.09906	2.21787	3.55622	15.3317	16.7825	16.4417	54.8742	55.5608	52.6833	7.51357	8.22772	7.64561
160	low	1	2006-10-27	2006	3	3	4334.9	3.63698	3.49797	17.1598	1	2.25768	5	9.27	9.07	9.75	73.7923	73.56	74.7965	2.79504	2.8775	2.84908	3.09906	2.21787	3.55622	15.3317	16.7825	16.4417	54.8742	55.5608	52.6833	7.51357	8.22772	7.64561
161	low	1	2006-10-27	2006	3	3	4334.9	3.63698	3.49797	17.1598	1	2.25768	5	9.27	9.07	9.75	73.7923	73.56	74.7965	2.79504	2.8775	2.84908	3.09906	2.21787	3.55622	15.3317	16.7825	16.4417	54.8742	55.5608	52.6833	7.51357	8.22772	7.64561
162	low	1	2006-10-27	2006	3	3	4334.9	3.63698	3.49797	17.1598	0	2.25768	5	9.27	9.07	9.75	73.7923	73.56	74.7965	2.79504	2.8775	2.84908	3.09906	2.21787	3.55622	15.3317	16.7825	16.4417	54.8742	55.5608	52.6833	7.51357	8.22772	7.64561
163	low	1	2006-10-27	2006	3	3	4334.9	3.63698	3.49797	17.1598	0	2.25768	5	9.27	9.07	9.75	73.7923	73.56	74.7965	2.79504	2.8775	2.84908	3.09906	2.21787	3.55622	15.3317	16.7825	16.4417	54.8742	55.5608	52.6833	7.51357	8.22772	7.64561
164	low	1	2006-12-01	2006	3	3	4334.9	3.63698	3.49797	17.1598	0	2.18469	5	9.27	9.07	9.75	73.7923	73.56	74.7965	2.79504	2.8775	2.84908	3.09906	2.21787	3.55622	15.3317	16.7825	16.4417	54.8742	55.5608	52.6833	7.51357	8.22772	7.64561
165	low	1	2006-12-01	2006	3	3	4334.9	3.63698	3.49797	17.1598	0	2.18469	5	9.27	9.07	9.75	73.7923	73.56	74.7965	2.79504	2.8775	2.84908	3.09906	2.21787	3.55622	15.3317	16.7825	16.4417	54.8742	55.5608	52.6833	7.51357	8.22772	7.64561
166	low	1	2006-12-01	2006	3	3	4334.9	3.63698	3.49797	17.1598	0	2.18469	5	9.27	9.07	9.75	73.7923	73.56	74.7965	2.79504	2.8775	2.84908	3.09906	2.21787	3.55622	15.3317	16.7825	16.4417	54.8742	55.5608	52.6833	7.51357	8.22772	7.64561
167	low	1	2006-12-01	2006	3	3	4334.9	3.63698	3.49797	17.1598	0	2.18469	5	9.27	9.07	9.75	73.7923	73.56	74.7965	2.79504	2.8775	2.84908	3.09906	2.21787	3.55622	15.3317	16.7825	16.4417	54.8742	55.5608	52.6833	7.51357	8.22772	7.64561
168	low	1	2006-12-01	2006	3	3	4334.9	3.63698	3.49797	17.1598	0	2.18469	5	9.27	9.07	9.75	73.7923	73.56	74.7965	2.79504	2.8775	2.84908	3.09906	2.21787	3.55622	15.3317	16.7825	16.4417	54.8742	55.5608	52.6833	7.51357	8.22772	7.64561
169	low	1	2006-12-01	2006	3	3	4334.9	3.63698	3.49797	17.1598	0	2.18469	5	9.27	9.07	9.75	73.7923	73.56	74.7965	2.79504	2.8775	2.84908	3.09906	2.21787	3.55622	15.3317	16.7825	16.4417	54.8742	55.5608	52.6833	7.51357	8.22772	7.64561
170	low	1	2007-01-17	2007	4	4	2580.55	3.41171	3.63698	15.6863	0	2.04922	1	9.07	9.75	9.84	73.56	74.7965	74.269	2.8775	2.84908	2.74486	2.21787	3.55622	3.69416	16.7825	16.4417	15.7875	55.5608	52.6833	56.2317	8.22772	7.64561	6.83353
171	low	1	2007-01-17	2007	4	4	2580.55	3.41171	3.63698	15.6863	0	2.04922	1	9.07	9.75	9.84	73.56	74.7965	74.269	2.8775	2.84908	2.74486	2.21787	3.55622	3.69416	16.7825	16.4417	15.7875	55.5608	52.6833	56.2317	8.22772	7.64561	6.83353
172	low	1	2007-01-17	2007	4	4	2580.55	3.41171	3.63698	15.6863	0	2.04922	1	9.07	9.75	9.84	73.56	74.7965	74.269	2.8775	2.84908	2.74486	2.21787	3.55622	3.69416	16.7825	16.4417	15.7875	55.5608	52.6833	56.2317	8.22772	7.64561	6.83353
173	low	1	2007-01-17	2007	4	4	2580.55	3.41171	3.63698	15.6863	0	2.04922	1	9.07	9.75	9.84	73.56	74.7965	74.269	2.8775	2.84908	2.74486	2.21787	3.55622	3.69416	16.7825	16.4417	15.7875	55.5608	52.6833	56.2317	8.22772	7.64561	6.83353
174	low	1	2007-01-17	2007	4	4	2580.55	3.41171	3.63698	15.6863	0	2.04922	1	9.07	9.75	9.84	73.56	74.7965	74.269	2.8775	2.84908	2.74486	2.21787	3.55622	3.69416	16.7825	16.4417	15.7875	55.5608	52.6833	56.2317	8.22772	7.64561	6.83353
175	low	1	2007-01-17	2007	4	4	2580.55	3.41171	3.63698	15.6863	0	2.04922	1	9.07	9.75	9.84	73.56	74.7965	74.269	2.8775	2.84908	2.74486	2.21787	3.55622	3.69416	16.7825	16.4417	15.7875	55.5608	52.6833	56.2317	8.22772	7.64561	6.83353
176	low	1	2007-01-17	2007	4	4	2580.55	3.41171	3.63698	15.6863	0	2.04922	1	9.07	9.75	9.84	73.56	74.7965	74.269	2.8775	2.84908	2.74486	2.21787	3.55622	3.69416	16.7825	16.4417	15.7875	55.5608	52.6833	56.2317	8.22772	7.64561	6.83353
177	low	1	2007-01-17	2007	4	4	2580.55	3.41171	3.63698	15.6863	0	2.04922	1	9.07	9.75	9.84	73.56	74.7965	74.269	2.8775	2.84908	2.74486	2.21787	3.55622	3.69416	16.7825	16.4417	15.7875	55.5608	52.6833	56.2317	8.22772	7.64561	6.83353
178	low	1	2007-02-16	2007	4	4	2580.55	3.41171	3.63698	15.6863	1	1.95904	1	9.07	9.75	9.84	73.56	74.7965	74.269	2.8775	2.84908	2.74486	2.21787	3.55622	3.69416	16.7825	16.4417	15.7875	55.5608	52.6833	56.2317	8.22772	7.64561	6.83353
179	low	1	2007-02-16	2007	4	4	2580.55	3.41171	3.63698	15.6863	1	1.95904	1	9.07	9.75	9.84	73.56	74.7965	74.269	2.8775	2.84908	2.74486	2.21787	3.55622	3.69416	16.7825	16.4417	15.7875	55.5608	52.6833	56.2317	8.22772	7.64561	6.83353
180	low	1	2007-02-16	2007	4	4	2580.55	3.41171	3.63698	15.6863	0	1.95904	1	9.07	9.75	9.84	73.56	74.7965	74.269	2.8775	2.84908	2.74486	2.21787	3.55622	3.69416	16.7825	16.4417	15.7875	55.5608	52.6833	56.2317	8.22772	7.64561	6.83353
181	low	1	2007-02-16	2007	4	4	2580.55	3.41171	3.63698	15.6863	0	1.95904	1	9.07	9.75	9.84	73.56	74.7965	74.269	2.8775	2.84908	2.74486	2.21787	3.55622	3.69416	16.7825	16.4417	15.7875	55.5608	52.6833	56.2317	8.22772	7.64561	6.83353
182	low	1	2007-02-16	2007	4	4	2580.55	3.41171	3.63698	15.6863	0	1.95904	1	9.07	9.75	9.84	73.56	74.7965	74.269	2.8775	2.84908	2.74486	2.21787	3.55622	3.69416	16.7825	16.4417	15.7875	55.5608	52.6833	56.2317	8.22772	7.64561	6.83353
183	low	1	2007-02-16	2007	4	4	2580.55	3.41171	3.63698	15.6863	0	1.95904	1	9.07	9.75	9.84	73.56	74.7965	74.269	2.8775	2.84908	2.74486	2.21787	3.55622	3.69416	16.7825	16.4417	15.7875	55.5608	52.6833	56.2317	8.22772	7.64561	6.83353
184	low	1	2007-02-16	2007	4	4	2580.55	3.41171	3.63698	15.6863	0	1.95904	1	9.07	9.75	9.84	73.56	74.7965	74.269	2.8775	2.84908	2.74486	2.21787	3.55622	3.69416	16.7825	16.4417	15.7875	55.5608	52.6833	56.2317	8.22772	7.64561	6.83353
185	low	1	2007-02-16	2007	4	4	2580.55	3.41171	3.63698	15.6863	0	1.95904	1	9.07	9.75	9.84	73.56	74.7965	74.269	2.8775	2.84908	2.74486	2.21787	3.55622	3.69416	16.7825	16.4417	15.7875	55.5608	52.6833	56.2317	8.22772	7.64561	6.83353
186	low	1	2007-02-16	2007	4	4	2580.55	3.41171	3.63698	15.6863	0	1.95904	1	9.07	9.75	9.84	73.56	74.7965	74.269	2.8775	2.84908	2.74486	2.21787	3.55622	3.69416	16.7825	16.4417	15.7875	55.5608	52.6833	56.2317	8.22772	7.64561	6.83353
187	low	1	2007-02-16	2007	4	4	2580.55	3.41171	3.63698	15.6863	0	1.95904	1	9.07	9.75	9.84	73.56	74.7965	74.269	2.8775	2.84908	2.74486	2.21787	3.55622	3.69416	16.7825	16.4417	15.7875	55.5608	52.6833	56.2317	8.22772	7.64561	6.83353
188	low	1	2007-02-16	2007	4	4	2580.55	3.41171	3.63698	15.6863	0	1.95904	1	9.07	9.75	9.84	73.56	74.7965	74.269	2.8775	2.84908	2.74486	2.21787	3.55622	3.69416	16.7825	16.4417	15.7875	55.5608	52.6833	56.2317	8.22772	7.64561	6.83353
189	low	1	2007-02-16	2007	4	4	2580.55	3.41171	3.63698	15.6863	0	1.95904	1	9.07	9.75	9.84	73.56	74.7965	74.269	2.8775	2.84908	2.74486	2.21787	3.55622	3.69416	16.7825	16.4417	15.7875	55.5608	52.6833	56.2317	8.22772	7.64561	6.83353
190	low	1	2007-02-16	2007	4	4	2580.55	3.41171	3.63698	15.6863	0	1.95904	1	9.07	9.75	9.84	73.56	74.7965	74.269	2.8775	2.84908	2.74486	2.21787	3.55622	3.69416	16.7825	16.4417	15.7875	55.5608	52.6833	56.2317	8.22772	7.64561	6.83353
191	low	1	2007-02-16	2007	4	4	2580.55	3.41171	3.63698	15.6863	0	1.95904	1	9.07	9.75	9.84	73.56	74.7965	74.269	2.8775	2.84908	2.74486	2.21787	3.55622	3.69416	16.7825	16.4417	15.7875	55.5608	52.6833	56.2317	8.22772	7.64561	6.83353
192	low	1	2007-02-16	2007	4	4	2580.55	3.41171	3.63698	15.6863	0	1.95904	1	9.07	9.75	9.84	73.56	74.7965	74.269	2.8775	2.84908	2.74486	2.21787	3.55622	3.69416	16.7825	16.4417	15.7875	55.5608	52.6833	56.2317	8.22772	7.64561	6.83353
193	low	1	2007-03-15	2007	4	4	2580.55	3.41171	3.63698	15.6863	0	2.34439	1	9.07	9.75	9.84	73.56	74.7965	74.269	2.8775	2.84908	2.74486	2.21787	3.55622	3.69416	16.7825	16.4417	15.7875	55.5608	52.6833	56.2317	8.22772	7.64561	6.83353
194	low	1	2007-03-15	2007	4	4	2580.55	3.41171	3.63698	15.6863	0	2.34439	1	9.07	9.75	9.84	73.56	74.7965	74.269	2.8775	2.84908	2.74486	2.21787	3.55622	3.69416	16.7825	16.4417	15.7875	55.5608	52.6833	56.2317	8.22772	7.64561	6.83353
195	low	1	2007-03-15	2007	4	4	2580.55	3.41171	3.63698	15.6863	0	2.34439	1	9.07	9.75	9.84	73.56	74.7965	74.269	2.8775	2.84908	2.74486	2.21787	3.55622	3.69416	16.7825	16.4417	15.7875	55.5608	52.6833	56.2317	8.22772	7.64561	6.83353
196	low	1	2007-03-15	2007	4	4	2580.55	3.41171	3.63698	15.6863	1	2.34439	1	9.07	9.75	9.84	73.56	74.7965	74.269	2.8775	2.84908	2.74486	2.21787	3.55622	3.69416	16.7825	16.4417	15.7875	55.5608	52.6833	56.2317	8.22772	7.64561	6.83353
197	low	1	2007-03-15	2007	4	4	2580.55	3.41171	3.63698	15.6863	0	2.34439	1	9.07	9.75	9.84	73.56	74.7965	74.269	2.8775	2.84908	2.74486	2.21787	3.55622	3.69416	16.7825	16.4417	15.7875	55.5608	52.6833	56.2317	8.22772	7.64561	6.83353
198	low	1	2007-03-15	2007	4	4	2580.55	3.41171	3.63698	15.6863	0	2.34439	1	9.07	9.75	9.84	73.56	74.7965	74.269	2.8775	2.84908	2.74486	2.21787	3.55622	3.69416	16.7825	16.4417	15.7875	55.5608	52.6833	56.2317	8.22772	7.64561	6.83353
199	low	1	2007-03-15	2007	4	4	2580.55	3.41171	3.63698	15.6863	0	2.34439	1	9.07	9.75	9.84	73.56	74.7965	74.269	2.8775	2.84908	2.74486	2.21787	3.55622	3.69416	16.7825	16.4417	15.7875	55.5608	52.6833	56.2317	8.22772	7.64561	6.83353
200	low	1	2007-03-15	2007	4	4	2580.55	3.41171	3.63698	15.6863	0	2.34439	1	9.07	9.75	9.84	73.56	74.7965	74.269	2.8775	2.84908	2.74486	2.21787	3.55622	3.69416	16.7825	16.4417	15.7875	55.5608	52.6833	56.2317	8.22772	7.64561	6.83353
201	low	1	2007-03-15	2007	4	4	2580.55	3.41171	3.63698	15.6863	0	2.34439	1	9.07	9.75	9.84	73.56	74.7965	74.269	2.8775	2.84908	2.74486	2.21787	3.55622	3.69416	16.7825	16.4417	15.7875	55.5608	52.6833	56.2317	8.22772	7.64561	6.83353
202	low	1	2007-03-15	2007	4	4	2580.55	3.41171	3.63698	15.6863	0	2.34439	1	9.07	9.75	9.84	73.56	74.7965	74.269	2.8775	2.84908	2.74486	2.21787	3.55622	3.69416	16.7825	16.4417	15.7875	55.5608	52.6833	56.2317	8.22772	7.64561	6.83353
203	low	1	2007-03-15	2007	4	4	2580.55	3.41171	3.63698	15.6863	0	2.34439	1	9.07	9.75	9.84	73.56	74.7965	74.269	2.8775	2.84908	2.74486	2.21787	3.55622	3.69416	16.7825	16.4417	15.7875	55.5608	52.6833	56.2317	8.22772	7.64561	6.83353
204	low	1	2007-03-15	2007	4	4	2580.55	3.41171	3.63698	15.6863	1	2.34439	1	9.07	9.75	9.84	73.56	74.7965	74.269	2.8775	2.84908	2.74486	2.21787	3.55622	3.69416	16.7825	16.4417	15.7875	55.5608	52.6833	56.2317	8.22772	7.64561	6.83353
205	low	1	2007-03-15	2007	4	4	2580.55	3.41171	3.63698	15.6863	1	2.34439	1	9.07	9.75	9.84	73.56	74.7965	74.269	2.8775	2.84908	2.74486	2.21787	3.55622	3.69416	16.7825	16.4417	15.7875	55.5608	52.6833	56.2317	8.22772	7.64561	6.83353
206	low	1	2007-03-15	2007	4	4	2580.55	3.41171	3.63698	15.6863	0	2.34439	1	9.07	9.75	9.84	73.56	74.7965	74.269	2.8775	2.84908	2.74486	2.21787	3.55622	3.69416	16.7825	16.4417	15.7875	55.5608	52.6833	56.2317	8.22772	7.64561	6.83353
207	low	1	2007-03-15	2007	4	4	2580.55	3.41171	3.63698	15.6863	0	2.34439	1	9.07	9.75	9.84	73.56	74.7965	74.269	2.8775	2.84908	2.74486	2.21787	3.55622	3.69416	16.7825	16.4417	15.7875	55.5608	52.6833	56.2317	8.22772	7.64561	6.83353
208	low	1	2007-03-15	2007	4	4	2580.55	3.41171	3.63698	15.6863	1	2.34439	1	9.07	9.75	9.84	73.56	74.7965	74.269	2.8775	2.84908	2.74486	2.21787	3.55622	3.69416	16.7825	16.4417	15.7875	55.5608	52.6833	56.2317	8.22772	7.64561	6.83353
209	low	1	2007-03-15	2007	4	4	2580.55	3.41171	3.63698	15.6863	0	2.34439	1	9.07	9.75	9.84	73.56	74.7965	74.269	2.8775	2.84908	2.74486	2.21787	3.55622	3.69416	16.7825	16.4417	15.7875	55.5608	52.6833	56.2317	8.22772	7.64561	6.83353
210	low	1	2007-03-15	2007	4	4	2580.55	3.41171	3.63698	15.6863	0	2.34439	1	9.07	9.75	9.84	73.56	74.7965	74.269	2.8775	2.84908	2.74486	2.21787	3.55622	3.69416	16.7825	16.4417	15.7875	55.5608	52.6833	56.2317	8.22772	7.64561	6.83353
211	low	1	2007-03-15	2007	4	4	2580.55	3.41171	3.63698	15.6863	0	2.34439	1	9.07	9.75	9.84	73.56	74.7965	74.269	2.8775	2.84908	2.74486	2.21787	3.55622	3.69416	16.7825	16.4417	15.7875	55.5608	52.6833	56.2317	8.22772	7.64561	6.83353
212	low	1	2007-03-15	2007	4	4	2580.55	3.41171	3.63698	15.6863	0	2.34439	1	9.07	9.75	9.84	73.56	74.7965	74.269	2.8775	2.84908	2.74486	2.21787	3.55622	3.69416	16.7825	16.4417	15.7875	55.5608	52.6833	56.2317	8.22772	7.64561	6.83353
213	low	1	2007-04-17	2007	4	4	2580.55	3.41171	3.63698	15.6863	0	1.92942	1	9.07	9.75	9.84	73.56	74.7965	74.269	2.8775	2.84908	2.74486	2.21787	3.55622	3.69416	16.7825	16.4417	15.7875	55.5608	52.6833	56.2317	8.22772	7.64561	6.83353
214	low	1	2007-04-17	2007	4	4	2580.55	3.41171	3.63698	15.6863	0	1.92942	1	9.07	9.75	9.84	73.56	74.7965	74.269	2.8775	2.84908	2.74486	2.21787	3.55622	3.69416	16.7825	16.4417	15.7875	55.5608	52.6833	56.2317	8.22772	7.64561	6.83353
215	low	1	2007-04-17	2007	4	4	2580.55	3.41171	3.63698	15.6863	0	1.92942	1	9.07	9.75	9.84	73.56	74.7965	74.269	2.8775	2.84908	2.74486	2.21787	3.55622	3.69416	16.7825	16.4417	15.7875	55.5608	52.6833	56.2317	8.22772	7.64561	6.83353
216	low	1	2007-04-17	2007	4	4	2580.55	3.41171	3.63698	15.6863	0	1.92942	1	9.07	9.75	9.84	73.56	74.7965	74.269	2.8775	2.84908	2.74486	2.21787	3.55622	3.69416	16.7825	16.4417	15.7875	55.5608	52.6833	56.2317	8.22772	7.64561	6.83353
217	low	1	2007-04-17	2007	4	4	2580.55	3.41171	3.63698	15.6863	0	1.92942	1	9.07	9.75	9.84	73.56	74.7965	74.269	2.8775	2.84908	2.74486	2.21787	3.55622	3.69416	16.7825	16.4417	15.7875	55.5608	52.6833	56.2317	8.22772	7.64561	6.83353
218	low	1	2007-04-17	2007	4	4	2580.55	3.41171	3.63698	15.6863	1	1.92942	1	9.07	9.75	9.84	73.56	74.7965	74.269	2.8775	2.84908	2.74486	2.21787	3.55622	3.69416	16.7825	16.4417	15.7875	55.5608	52.6833	56.2317	8.22772	7.64561	6.83353
219	low	1	2007-04-17	2007	4	4	2580.55	3.41171	3.63698	15.6863	0	1.92942	1	9.07	9.75	9.84	73.56	74.7965	74.269	2.8775	2.84908	2.74486	2.21787	3.55622	3.69416	16.7825	16.4417	15.7875	55.5608	52.6833	56.2317	8.22772	7.64561	6.83353
220	low	1	2007-04-17	2007	4	4	2580.55	3.41171	3.63698	15.6863	0	1.92942	1	9.07	9.75	9.84	73.56	74.7965	74.269	2.8775	2.84908	2.74486	2.21787	3.55622	3.69416	16.7825	16.4417	15.7875	55.5608	52.6833	56.2317	8.22772	7.64561	6.83353
221	low	1	2007-04-17	2007	4	4	2580.55	3.41171	3.63698	15.6863	0	1.92942	1	9.07	9.75	9.84	73.56	74.7965	74.269	2.8775	2.84908	2.74486	2.21787	3.55622	3.69416	16.7825	16.4417	15.7875	55.5608	52.6833	56.2317	8.22772	7.64561	6.83353
222	low	1	2007-04-17	2007	4	4	2580.55	3.41171	3.63698	15.6863	0	1.92942	1	9.07	9.75	9.84	73.56	74.7965	74.269	2.8775	2.84908	2.74486	2.21787	3.55622	3.69416	16.7825	16.4417	15.7875	55.5608	52.6833	56.2317	8.22772	7.64561	6.83353
223	low	1	2007-04-17	2007	4	4	2580.55	3.41171	3.63698	15.6863	0	1.92942	1	9.07	9.75	9.84	73.56	74.7965	74.269	2.8775	2.84908	2.74486	2.21787	3.55622	3.69416	16.7825	16.4417	15.7875	55.5608	52.6833	56.2317	8.22772	7.64561	6.83353
224	low	1	2007-04-17	2007	4	4	2580.55	3.41171	3.63698	15.6863	0	1.92942	1	9.07	9.75	9.84	73.56	74.7965	74.269	2.8775	2.84908	2.74486	2.21787	3.55622	3.69416	16.7825	16.4417	15.7875	55.5608	52.6833	56.2317	8.22772	7.64561	6.83353
225	low	1	2007-04-17	2007	4	4	2580.55	3.41171	3.63698	15.6863	0	1.92942	1	9.07	9.75	9.84	73.56	74.7965	74.269	2.8775	2.84908	2.74486	2.21787	3.55622	3.69416	16.7825	16.4417	15.7875	55.5608	52.6833	56.2317	8.22772	7.64561	6.83353
226	low	1	2007-04-17	2007	4	4	2580.55	3.41171	3.63698	15.6863	0	1.92942	1	9.07	9.75	9.84	73.56	74.7965	74.269	2.8775	2.84908	2.74486	2.21787	3.55622	3.69416	16.7825	16.4417	15.7875	55.5608	52.6833	56.2317	8.22772	7.64561	6.83353
227	low	1	2007-04-17	2007	4	4	2580.55	3.41171	3.63698	15.6863	0	1.92942	1	9.07	9.75	9.84	73.56	74.7965	74.269	2.8775	2.84908	2.74486	2.21787	3.55622	3.69416	16.7825	16.4417	15.7875	55.5608	52.6833	56.2317	8.22772	7.64561	6.83353
228	low	1	2007-04-17	2007	4	4	2580.55	3.41171	3.63698	15.6863	0	1.92942	1	9.07	9.75	9.84	73.56	74.7965	74.269	2.8775	2.84908	2.74486	2.21787	3.55622	3.69416	16.7825	16.4417	15.7875	55.5608	52.6833	56.2317	8.22772	7.64561	6.83353
229	low	1	2007-04-17	2007	4	4	2580.55	3.41171	3.63698	15.6863	1	1.92942	1	9.07	9.75	9.84	73.56	74.7965	74.269	2.8775	2.84908	2.74486	2.21787	3.55622	3.69416	16.7825	16.4417	15.7875	55.5608	52.6833	56.2317	8.22772	7.64561	6.83353
230	low	1	2007-04-17	2007	4	4	2580.55	3.41171	3.63698	15.6863	0	1.92942	1	9.07	9.75	9.84	73.56	74.7965	74.269	2.8775	2.84908	2.74486	2.21787	3.55622	3.69416	16.7825	16.4417	15.7875	55.5608	52.6833	56.2317	8.22772	7.64561	6.83353
231	low	1	2007-04-17	2007	4	4	2580.55	3.41171	3.63698	15.6863	1	1.92942	1	9.07	9.75	9.84	73.56	74.7965	74.269	2.8775	2.84908	2.74486	2.21787	3.55622	3.69416	16.7825	16.4417	15.7875	55.5608	52.6833	56.2317	8.22772	7.64561	6.83353
232	low	1	2007-04-17	2007	4	4	2580.55	3.41171	3.63698	15.6863	0	1.92942	1	9.07	9.75	9.84	73.56	74.7965	74.269	2.8775	2.84908	2.74486	2.21787	3.55622	3.69416	16.7825	16.4417	15.7875	55.5608	52.6833	56.2317	8.22772	7.64561	6.83353
233	low	1	2007-05-23	2007	4	4	2580.55	3.41171	3.63698	15.6863	0	2.1038	1	9.07	9.75	9.84	73.56	74.7965	74.269	2.8775	2.84908	2.74486	2.21787	3.55622	3.69416	16.7825	16.4417	15.7875	55.5608	52.6833	56.2317	8.22772	7.64561	6.83353
234	low	1	2007-05-23	2007	4	4	2580.55	3.41171	3.63698	15.6863	0	2.1038	1	9.07	9.75	9.84	73.56	74.7965	74.269	2.8775	2.84908	2.74486	2.21787	3.55622	3.69416	16.7825	16.4417	15.7875	55.5608	52.6833	56.2317	8.22772	7.64561	6.83353
235	low	1	2007-05-23	2007	4	4	2580.55	3.41171	3.63698	15.6863	0	2.1038	1	9.07	9.75	9.84	73.56	74.7965	74.269	2.8775	2.84908	2.74486	2.21787	3.55622	3.69416	16.7825	16.4417	15.7875	55.5608	52.6833	56.2317	8.22772	7.64561	6.83353
236	low	1	2007-05-23	2007	4	4	2580.55	3.41171	3.63698	15.6863	0	2.1038	1	9.07	9.75	9.84	73.56	74.7965	74.269	2.8775	2.84908	2.74486	2.21787	3.55622	3.69416	16.7825	16.4417	15.7875	55.5608	52.6833	56.2317	8.22772	7.64561	6.83353
237	low	1	2007-05-23	2007	4	4	2580.55	3.41171	3.63698	15.6863	0	2.1038	1	9.07	9.75	9.84	73.56	74.7965	74.269	2.8775	2.84908	2.74486	2.21787	3.55622	3.69416	16.7825	16.4417	15.7875	55.5608	52.6833	56.2317	8.22772	7.64561	6.83353
238	low	1	2007-05-23	2007	4	4	2580.55	3.41171	3.63698	15.6863	0	2.1038	1	9.07	9.75	9.84	73.56	74.7965	74.269	2.8775	2.84908	2.74486	2.21787	3.55622	3.69416	16.7825	16.4417	15.7875	55.5608	52.6833	56.2317	8.22772	7.64561	6.83353
239	low	1	2007-05-23	2007	4	4	2580.55	3.41171	3.63698	15.6863	0	2.1038	1	9.07	9.75	9.84	73.56	74.7965	74.269	2.8775	2.84908	2.74486	2.21787	3.55622	3.69416	16.7825	16.4417	15.7875	55.5608	52.6833	56.2317	8.22772	7.64561	6.83353
240	low	1	2007-05-23	2007	4	4	2580.55	3.41171	3.63698	15.6863	1	2.1038	1	9.07	9.75	9.84	73.56	74.7965	74.269	2.8775	2.84908	2.74486	2.21787	3.55622	3.69416	16.7825	16.4417	15.7875	55.5608	52.6833	56.2317	8.22772	7.64561	6.83353
241	low	1	2007-05-23	2007	4	4	2580.55	3.41171	3.63698	15.6863	0	2.1038	1	9.07	9.75	9.84	73.56	74.7965	74.269	2.8775	2.84908	2.74486	2.21787	3.55622	3.69416	16.7825	16.4417	15.7875	55.5608	52.6833	56.2317	8.22772	7.64561	6.83353
242	low	1	2007-05-23	2007	4	4	2580.55	3.41171	3.63698	15.6863	0	2.1038	1	9.07	9.75	9.84	73.56	74.7965	74.269	2.8775	2.84908	2.74486	2.21787	3.55622	3.69416	16.7825	16.4417	15.7875	55.5608	52.6833	56.2317	8.22772	7.64561	6.83353
243	low	1	2007-05-23	2007	4	4	2580.55	3.41171	3.63698	15.6863	0	2.1038	1	9.07	9.75	9.84	73.56	74.7965	74.269	2.8775	2.84908	2.74486	2.21787	3.55622	3.69416	16.7825	16.4417	15.7875	55.5608	52.6833	56.2317	8.22772	7.64561	6.83353
244	low	1	2007-05-23	2007	4	4	2580.55	3.41171	3.63698	15.6863	0	2.1038	1	9.07	9.75	9.84	73.56	74.7965	74.269	2.8775	2.84908	2.74486	2.21787	3.55622	3.69416	16.7825	16.4417	15.7875	55.5608	52.6833	56.2317	8.22772	7.64561	6.83353
245	low	1	2007-05-23	2007	4	4	2580.55	3.41171	3.63698	15.6863	0	2.1038	1	9.07	9.75	9.84	73.56	74.7965	74.269	2.8775	2.84908	2.74486	2.21787	3.55622	3.69416	16.7825	16.4417	15.7875	55.5608	52.6833	56.2317	8.22772	7.64561	6.83353
246	low	1	2007-05-23	2007	4	4	2580.55	3.41171	3.63698	15.6863	0	2.1038	1	9.07	9.75	9.84	73.56	74.7965	74.269	2.8775	2.84908	2.74486	2.21787	3.55622	3.69416	16.7825	16.4417	15.7875	55.5608	52.6833	56.2317	8.22772	7.64561	6.83353
247	low	1	2007-05-23	2007	4	4	2580.55	3.41171	3.63698	15.6863	0	2.1038	1	9.07	9.75	9.84	73.56	74.7965	74.269	2.8775	2.84908	2.74486	2.21787	3.55622	3.69416	16.7825	16.4417	15.7875	55.5608	52.6833	56.2317	8.22772	7.64561	6.83353
248	low	1	2007-05-23	2007	4	4	2580.55	3.41171	3.63698	15.6863	0	2.1038	1	9.07	9.75	9.84	73.56	74.7965	74.269	2.8775	2.84908	2.74486	2.21787	3.55622	3.69416	16.7825	16.4417	15.7875	55.5608	52.6833	56.2317	8.22772	7.64561	6.83353
249	low	1	2007-05-23	2007	4	4	2580.55	3.41171	3.63698	15.6863	0	2.1038	1	9.07	9.75	9.84	73.56	74.7965	74.269	2.8775	2.84908	2.74486	2.21787	3.55622	3.69416	16.7825	16.4417	15.7875	55.5608	52.6833	56.2317	8.22772	7.64561	6.83353
250	low	1	2007-05-23	2007	4	4	2580.55	3.41171	3.63698	15.6863	0	2.1038	1	9.07	9.75	9.84	73.56	74.7965	74.269	2.8775	2.84908	2.74486	2.21787	3.55622	3.69416	16.7825	16.4417	15.7875	55.5608	52.6833	56.2317	8.22772	7.64561	6.83353
251	low	1	2007-05-23	2007	4	4	2580.55	3.41171	3.63698	15.6863	0	2.1038	1	9.07	9.75	9.84	73.56	74.7965	74.269	2.8775	2.84908	2.74486	2.21787	3.55622	3.69416	16.7825	16.4417	15.7875	55.5608	52.6833	56.2317	8.22772	7.64561	6.83353
252	low	1	2007-05-23	2007	4	4	2580.55	3.41171	3.63698	15.6863	0	2.1038	1	9.07	9.75	9.84	73.56	74.7965	74.269	2.8775	2.84908	2.74486	2.21787	3.55622	3.69416	16.7825	16.4417	15.7875	55.5608	52.6833	56.2317	8.22772	7.64561	6.83353
253	low	1	2007-07-17	2007	4	4	2580.55	3.41171	3.63698	15.6863	0	2.13988	1	9.07	9.75	9.84	73.56	74.7965	74.269	2.8775	2.84908	2.74486	2.21787	3.55622	3.69416	16.7825	16.4417	15.7875	55.5608	52.6833	56.2317	8.22772	7.64561	6.83353
254	low	1	2007-07-17	2007	4	4	2580.55	3.41171	3.63698	15.6863	0	2.13988	1	9.07	9.75	9.84	73.56	74.7965	74.269	2.8775	2.84908	2.74486	2.21787	3.55622	3.69416	16.7825	16.4417	15.7875	55.5608	52.6833	56.2317	8.22772	7.64561	6.83353
255	low	1	2007-07-17	2007	4	4	2580.55	3.41171	3.63698	15.6863	0	2.13988	1	9.07	9.75	9.84	73.56	74.7965	74.269	2.8775	2.84908	2.74486	2.21787	3.55622	3.69416	16.7825	16.4417	15.7875	55.5608	52.6833	56.2317	8.22772	7.64561	6.83353
256	low	1	2007-07-17	2007	4	4	2580.55	3.41171	3.63698	15.6863	0	2.13988	1	9.07	9.75	9.84	73.56	74.7965	74.269	2.8775	2.84908	2.74486	2.21787	3.55622	3.69416	16.7825	16.4417	15.7875	55.5608	52.6833	56.2317	8.22772	7.64561	6.83353
257	low	1	2007-07-17	2007	4	4	2580.55	3.41171	3.63698	15.6863	0	2.13988	1	9.07	9.75	9.84	73.56	74.7965	74.269	2.8775	2.84908	2.74486	2.21787	3.55622	3.69416	16.7825	16.4417	15.7875	55.5608	52.6833	56.2317	8.22772	7.64561	6.83353
258	low	1	2007-07-17	2007	4	4	2580.55	3.41171	3.63698	15.6863	0	2.13988	1	9.07	9.75	9.84	73.56	74.7965	74.269	2.8775	2.84908	2.74486	2.21787	3.55622	3.69416	16.7825	16.4417	15.7875	55.5608	52.6833	56.2317	8.22772	7.64561	6.83353
259	low	1	2007-07-17	2007	4	4	2580.55	3.41171	3.63698	15.6863	0	2.13988	1	9.07	9.75	9.84	73.56	74.7965	74.269	2.8775	2.84908	2.74486	2.21787	3.55622	3.69416	16.7825	16.4417	15.7875	55.5608	52.6833	56.2317	8.22772	7.64561	6.83353
260	low	1	2007-07-17	2007	4	4	2580.55	3.41171	3.63698	15.6863	0	2.13988	1	9.07	9.75	9.84	73.56	74.7965	74.269	2.8775	2.84908	2.74486	2.21787	3.55622	3.69416	16.7825	16.4417	15.7875	55.5608	52.6833	56.2317	8.22772	7.64561	6.83353
261	low	1	2007-07-17	2007	4	4	2580.55	3.41171	3.63698	15.6863	0	2.13988	1	9.07	9.75	9.84	73.56	74.7965	74.269	2.8775	2.84908	2.74486	2.21787	3.55622	3.69416	16.7825	16.4417	15.7875	55.5608	52.6833	56.2317	8.22772	7.64561	6.83353
262	low	1	2007-07-17	2007	4	4	2580.55	3.41171	3.63698	15.6863	0	2.13988	1	9.07	9.75	9.84	73.56	74.7965	74.269	2.8775	2.84908	2.74486	2.21787	3.55622	3.69416	16.7825	16.4417	15.7875	55.5608	52.6833	56.2317	8.22772	7.64561	6.83353
263	low	1	2007-07-17	2007	4	4	2580.55	3.41171	3.63698	15.6863	0	2.13988	1	9.07	9.75	9.84	73.56	74.7965	74.269	2.8775	2.84908	2.74486	2.21787	3.55622	3.69416	16.7825	16.4417	15.7875	55.5608	52.6833	56.2317	8.22772	7.64561	6.83353
264	low	1	2007-07-17	2007	4	4	2580.55	3.41171	3.63698	15.6863	0	2.13988	1	9.07	9.75	9.84	73.56	74.7965	74.269	2.8775	2.84908	2.74486	2.21787	3.55622	3.69416	16.7825	16.4417	15.7875	55.5608	52.6833	56.2317	8.22772	7.64561	6.83353
265	low	1	2007-07-17	2007	4	4	2580.55	3.41171	3.63698	15.6863	0	2.13988	1	9.07	9.75	9.84	73.56	74.7965	74.269	2.8775	2.84908	2.74486	2.21787	3.55622	3.69416	16.7825	16.4417	15.7875	55.5608	52.6833	56.2317	8.22772	7.64561	6.83353
266	low	1	2007-07-17	2007	4	4	2580.55	3.41171	3.63698	15.6863	0	2.13988	1	9.07	9.75	9.84	73.56	74.7965	74.269	2.8775	2.84908	2.74486	2.21787	3.55622	3.69416	16.7825	16.4417	15.7875	55.5608	52.6833	56.2317	8.22772	7.64561	6.83353
267	low	1	2007-07-17	2007	4	4	2580.55	3.41171	3.63698	15.6863	0	2.13988	1	9.07	9.75	9.84	73.56	74.7965	74.269	2.8775	2.84908	2.74486	2.21787	3.55622	3.69416	16.7825	16.4417	15.7875	55.5608	52.6833	56.2317	8.22772	7.64561	6.83353
268	low	1	2007-07-17	2007	4	4	2580.55	3.41171	3.63698	15.6863	0	2.13988	1	9.07	9.75	9.84	73.56	74.7965	74.269	2.8775	2.84908	2.74486	2.21787	3.55622	3.69416	16.7825	16.4417	15.7875	55.5608	52.6833	56.2317	8.22772	7.64561	6.83353
269	low	1	2007-07-17	2007	4	4	2580.55	3.41171	3.63698	15.6863	0	2.13988	1	9.07	9.75	9.84	73.56	74.7965	74.269	2.8775	2.84908	2.74486	2.21787	3.55622	3.69416	16.7825	16.4417	15.7875	55.5608	52.6833	56.2317	8.22772	7.64561	6.83353
270	low	1	2007-07-17	2007	4	4	2580.55	3.41171	3.63698	15.6863	0	2.13988	1	9.07	9.75	9.84	73.56	74.7965	74.269	2.8775	2.84908	2.74486	2.21787	3.55622	3.69416	16.7825	16.4417	15.7875	55.5608	52.6833	56.2317	8.22772	7.64561	6.83353
271	low	1	2007-07-17	2007	4	4	2580.55	3.41171	3.63698	15.6863	0	2.13988	1	9.07	9.75	9.84	73.56	74.7965	74.269	2.8775	2.84908	2.74486	2.21787	3.55622	3.69416	16.7825	16.4417	15.7875	55.5608	52.6833	56.2317	8.22772	7.64561	6.83353
272	low	1	2007-08-01	2007	4	4	2580.55	3.41171	3.63698	15.6863	0	2.01703	1	9.07	9.75	9.84	73.56	74.7965	74.269	2.8775	2.84908	2.74486	2.21787	3.55622	3.69416	16.7825	16.4417	15.7875	55.5608	52.6833	56.2317	8.22772	7.64561	6.83353
273	low	1	2007-08-01	2007	4	4	2580.55	3.41171	3.63698	15.6863	0	2.01703	1	9.07	9.75	9.84	73.56	74.7965	74.269	2.8775	2.84908	2.74486	2.21787	3.55622	3.69416	16.7825	16.4417	15.7875	55.5608	52.6833	56.2317	8.22772	7.64561	6.83353
274	low	1	2007-08-01	2007	4	4	2580.55	3.41171	3.63698	15.6863	0	2.01703	1	9.07	9.75	9.84	73.56	74.7965	74.269	2.8775	2.84908	2.74486	2.21787	3.55622	3.69416	16.7825	16.4417	15.7875	55.5608	52.6833	56.2317	8.22772	7.64561	6.83353
275	low	1	2007-08-01	2007	4	4	2580.55	3.41171	3.63698	15.6863	0	2.01703	1	9.07	9.75	9.84	73.56	74.7965	74.269	2.8775	2.84908	2.74486	2.21787	3.55622	3.69416	16.7825	16.4417	15.7875	55.5608	52.6833	56.2317	8.22772	7.64561	6.83353
276	low	1	2007-08-01	2007	4	4	2580.55	3.41171	3.63698	15.6863	0	2.01703	1	9.07	9.75	9.84	73.56	74.7965	74.269	2.8775	2.84908	2.74486	2.21787	3.55622	3.69416	16.7825	16.4417	15.7875	55.5608	52.6833	56.2317	8.22772	7.64561	6.83353
277	low	1	2007-08-01	2007	4	4	2580.55	3.41171	3.63698	15.6863	0	2.01703	1	9.07	9.75	9.84	73.56	74.7965	74.269	2.8775	2.84908	2.74486	2.21787	3.55622	3.69416	16.7825	16.4417	15.7875	55.5608	52.6833	56.2317	8.22772	7.64561	6.83353
278	low	1	2007-08-01	2007	4	4	2580.55	3.41171	3.63698	15.6863	1	2.01703	1	9.07	9.75	9.84	73.56	74.7965	74.269	2.8775	2.84908	2.74486	2.21787	3.55622	3.69416	16.7825	16.4417	15.7875	55.5608	52.6833	56.2317	8.22772	7.64561	6.83353
279	low	1	2007-08-01	2007	4	4	2580.55	3.41171	3.63698	15.6863	0	2.01703	1	9.07	9.75	9.84	73.56	74.7965	74.269	2.8775	2.84908	2.74486	2.21787	3.55622	3.69416	16.7825	16.4417	15.7875	55.5608	52.6833	56.2317	8.22772	7.64561	6.83353
280	low	1	2007-08-01	2007	4	4	2580.55	3.41171	3.63698	15.6863	0	2.01703	1	9.07	9.75	9.84	73.56	74.7965	74.269	2.8775	2.84908	2.74486	2.21787	3.55622	3.69416	16.7825	16.4417	15.7875	55.5608	52.6833	56.2317	8.22772	7.64561	6.83353
281	low	1	2007-08-01	2007	4	4	2580.55	3.41171	3.63698	15.6863	1	2.01703	1	9.07	9.75	9.84	73.56	74.7965	74.269	2.8775	2.84908	2.74486	2.21787	3.55622	3.69416	16.7825	16.4417	15.7875	55.5608	52.6833	56.2317	8.22772	7.64561	6.83353
282	low	1	2007-08-01	2007	4	4	2580.55	3.41171	3.63698	15.6863	0	2.01703	1	9.07	9.75	9.84	73.56	74.7965	74.269	2.8775	2.84908	2.74486	2.21787	3.55622	3.69416	16.7825	16.4417	15.7875	55.5608	52.6833	56.2317	8.22772	7.64561	6.83353
283	low	1	2007-09-21	2007	4	4	2580.55	3.41171	3.63698	15.6863	0	1.91908	1	9.07	9.75	9.84	73.56	74.7965	74.269	2.8775	2.84908	2.74486	2.21787	3.55622	3.69416	16.7825	16.4417	15.7875	55.5608	52.6833	56.2317	8.22772	7.64561	6.83353
284	low	1	2007-09-21	2007	4	4	2580.55	3.41171	3.63698	15.6863	1	1.91908	1	9.07	9.75	9.84	73.56	74.7965	74.269	2.8775	2.84908	2.74486	2.21787	3.55622	3.69416	16.7825	16.4417	15.7875	55.5608	52.6833	56.2317	8.22772	7.64561	6.83353
285	low	1	2007-09-21	2007	4	4	2580.55	3.41171	3.63698	15.6863	0	1.91908	1	9.07	9.75	9.84	73.56	74.7965	74.269	2.8775	2.84908	2.74486	2.21787	3.55622	3.69416	16.7825	16.4417	15.7875	55.5608	52.6833	56.2317	8.22772	7.64561	6.83353
286	low	1	2007-09-21	2007	4	4	2580.55	3.41171	3.63698	15.6863	0	1.91908	1	9.07	9.75	9.84	73.56	74.7965	74.269	2.8775	2.84908	2.74486	2.21787	3.55622	3.69416	16.7825	16.4417	15.7875	55.5608	52.6833	56.2317	8.22772	7.64561	6.83353
287	low	1	2007-09-21	2007	4	4	2580.55	3.41171	3.63698	15.6863	0	1.91908	1	9.07	9.75	9.84	73.56	74.7965	74.269	2.8775	2.84908	2.74486	2.21787	3.55622	3.69416	16.7825	16.4417	15.7875	55.5608	52.6833	56.2317	8.22772	7.64561	6.83353
288	low	1	2007-09-21	2007	4	4	2580.55	3.41171	3.63698	15.6863	1	1.91908	1	9.07	9.75	9.84	73.56	74.7965	74.269	2.8775	2.84908	2.74486	2.21787	3.55622	3.69416	16.7825	16.4417	15.7875	55.5608	52.6833	56.2317	8.22772	7.64561	6.83353
289	low	1	2007-09-21	2007	4	4	2580.55	3.41171	3.63698	15.6863	1	1.91908	1	9.07	9.75	9.84	73.56	74.7965	74.269	2.8775	2.84908	2.74486	2.21787	3.55622	3.69416	16.7825	16.4417	15.7875	55.5608	52.6833	56.2317	8.22772	7.64561	6.83353
290	low	1	2007-09-21	2007	4	4	2580.55	3.41171	3.63698	15.6863	0	1.91908	1	9.07	9.75	9.84	73.56	74.7965	74.269	2.8775	2.84908	2.74486	2.21787	3.55622	3.69416	16.7825	16.4417	15.7875	55.5608	52.6833	56.2317	8.22772	7.64561	6.83353
291	low	1	2007-09-21	2007	4	4	2580.55	3.41171	3.63698	15.6863	0	1.91908	1	9.07	9.75	9.84	73.56	74.7965	74.269	2.8775	2.84908	2.74486	2.21787	3.55622	3.69416	16.7825	16.4417	15.7875	55.5608	52.6833	56.2317	8.22772	7.64561	6.83353
292	low	1	2007-09-21	2007	4	4	2580.55	3.41171	3.63698	15.6863	0	1.91908	1	9.07	9.75	9.84	73.56	74.7965	74.269	2.8775	2.84908	2.74486	2.21787	3.55622	3.69416	16.7825	16.4417	15.7875	55.5608	52.6833	56.2317	8.22772	7.64561	6.83353
293	low	1	2007-09-21	2007	4	4	2580.55	3.41171	3.63698	15.6863	1	1.91908	1	9.07	9.75	9.84	73.56	74.7965	74.269	2.8775	2.84908	2.74486	2.21787	3.55622	3.69416	16.7825	16.4417	15.7875	55.5608	52.6833	56.2317	8.22772	7.64561	6.83353
294	low	1	2007-09-21	2007	4	4	2580.55	3.41171	3.63698	15.6863	0	1.91908	1	9.07	9.75	9.84	73.56	74.7965	74.269	2.8775	2.84908	2.74486	2.21787	3.55622	3.69416	16.7825	16.4417	15.7875	55.5608	52.6833	56.2317	8.22772	7.64561	6.83353
295	low	1	2007-09-21	2007	4	4	2580.55	3.41171	3.63698	15.6863	0	1.91908	1	9.07	9.75	9.84	73.56	74.7965	74.269	2.8775	2.84908	2.74486	2.21787	3.55622	3.69416	16.7825	16.4417	15.7875	55.5608	52.6833	56.2317	8.22772	7.64561	6.83353
296	low	1	2007-09-21	2007	4	4	2580.55	3.41171	3.63698	15.6863	0	1.91908	1	9.07	9.75	9.84	73.56	74.7965	74.269	2.8775	2.84908	2.74486	2.21787	3.55622	3.69416	16.7825	16.4417	15.7875	55.5608	52.6833	56.2317	8.22772	7.64561	6.83353
297	low	1	2007-09-21	2007	4	4	2580.55	3.41171	3.63698	15.6863	0	1.91908	1	9.07	9.75	9.84	73.56	74.7965	74.269	2.8775	2.84908	2.74486	2.21787	3.55622	3.69416	16.7825	16.4417	15.7875	55.5608	52.6833	56.2317	8.22772	7.64561	6.83353
298	low	1	2007-09-21	2007	4	4	2580.55	3.41171	3.63698	15.6863	1	1.91908	1	9.07	9.75	9.84	73.56	74.7965	74.269	2.8775	2.84908	2.74486	2.21787	3.55622	3.69416	16.7825	16.4417	15.7875	55.5608	52.6833	56.2317	8.22772	7.64561	6.83353
299	low	1	2007-09-21	2007	4	4	2580.55	3.41171	3.63698	15.6863	0	1.91908	1	9.07	9.75	9.84	73.56	74.7965	74.269	2.8775	2.84908	2.74486	2.21787	3.55622	3.69416	16.7825	16.4417	15.7875	55.5608	52.6833	56.2317	8.22772	7.64561	6.83353
300	low	1	2007-09-21	2007	4	4	2580.55	3.41171	3.63698	15.6863	0	1.91908	1	9.07	9.75	9.84	73.56	74.7965	74.269	2.8775	2.84908	2.74486	2.21787	3.55622	3.69416	16.7825	16.4417	15.7875	55.5608	52.6833	56.2317	8.22772	7.64561	6.83353
301	low	1	2007-09-21	2007	4	4	2580.55	3.41171	3.63698	15.6863	0	1.91908	1	9.07	9.75	9.84	73.56	74.7965	74.269	2.8775	2.84908	2.74486	2.21787	3.55622	3.69416	16.7825	16.4417	15.7875	55.5608	52.6833	56.2317	8.22772	7.64561	6.83353
302	low	1	2007-09-21	2007	4	4	2580.55	3.41171	3.63698	15.6863	0	1.91908	1	9.07	9.75	9.84	73.56	74.7965	74.269	2.8775	2.84908	2.74486	2.21787	3.55622	3.69416	16.7825	16.4417	15.7875	55.5608	52.6833	56.2317	8.22772	7.64561	6.83353
303	low	1	2007-11-02	2007	4	4	2580.55	3.41171	3.63698	15.6863	0	1.65321	1	9.07	9.75	9.84	73.56	74.7965	74.269	2.8775	2.84908	2.74486	2.21787	3.55622	3.69416	16.7825	16.4417	15.7875	55.5608	52.6833	56.2317	8.22772	7.64561	6.83353
304	low	1	2007-11-02	2007	4	4	2580.55	3.41171	3.63698	15.6863	0	1.65321	1	9.07	9.75	9.84	73.56	74.7965	74.269	2.8775	2.84908	2.74486	2.21787	3.55622	3.69416	16.7825	16.4417	15.7875	55.5608	52.6833	56.2317	8.22772	7.64561	6.83353
305	low	1	2007-11-02	2007	4	4	2580.55	3.41171	3.63698	15.6863	0	1.65321	1	9.07	9.75	9.84	73.56	74.7965	74.269	2.8775	2.84908	2.74486	2.21787	3.55622	3.69416	16.7825	16.4417	15.7875	55.5608	52.6833	56.2317	8.22772	7.64561	6.83353
306	low	1	2007-11-02	2007	4	4	2580.55	3.41171	3.63698	15.6863	1	1.65321	1	9.07	9.75	9.84	73.56	74.7965	74.269	2.8775	2.84908	2.74486	2.21787	3.55622	3.69416	16.7825	16.4417	15.7875	55.5608	52.6833	56.2317	8.22772	7.64561	6.83353
307	low	1	2007-11-02	2007	4	4	2580.55	3.41171	3.63698	15.6863	0	1.65321	1	9.07	9.75	9.84	73.56	74.7965	74.269	2.8775	2.84908	2.74486	2.21787	3.55622	3.69416	16.7825	16.4417	15.7875	55.5608	52.6833	56.2317	8.22772	7.64561	6.83353
308	low	1	2007-11-02	2007	4	4	2580.55	3.41171	3.63698	15.6863	1	1.65321	1	9.07	9.75	9.84	73.56	74.7965	74.269	2.8775	2.84908	2.74486	2.21787	3.55622	3.69416	16.7825	16.4417	15.7875	55.5608	52.6833	56.2317	8.22772	7.64561	6.83353
309	low	1	2007-11-02	2007	4	4	2580.55	3.41171	3.63698	15.6863	0	1.65321	1	9.07	9.75	9.84	73.56	74.7965	74.269	2.8775	2.84908	2.74486	2.21787	3.55622	3.69416	16.7825	16.4417	15.7875	55.5608	52.6833	56.2317	8.22772	7.64561	6.83353
310	low	1	2007-11-02	2007	4	4	2580.55	3.41171	3.63698	15.6863	0	1.65321	1	9.07	9.75	9.84	73.56	74.7965	74.269	2.8775	2.84908	2.74486	2.21787	3.55622	3.69416	16.7825	16.4417	15.7875	55.5608	52.6833	56.2317	8.22772	7.64561	6.83353
311	low	1	2007-11-02	2007	4	4	2580.55	3.41171	3.63698	15.6863	0	1.65321	1	9.07	9.75	9.84	73.56	74.7965	74.269	2.8775	2.84908	2.74486	2.21787	3.55622	3.69416	16.7825	16.4417	15.7875	55.5608	52.6833	56.2317	8.22772	7.64561	6.83353
312	low	1	2007-11-02	2007	4	4	2580.55	3.41171	3.63698	15.6863	1	1.65321	1	9.07	9.75	9.84	73.56	74.7965	74.269	2.8775	2.84908	2.74486	2.21787	3.55622	3.69416	16.7825	16.4417	15.7875	55.5608	52.6833	56.2317	8.22772	7.64561	6.83353
313	low	1	2007-11-02	2007	4	4	2580.55	3.41171	3.63698	15.6863	0	1.65321	1	9.07	9.75	9.84	73.56	74.7965	74.269	2.8775	2.84908	2.74486	2.21787	3.55622	3.69416	16.7825	16.4417	15.7875	55.5608	52.6833	56.2317	8.22772	7.64561	6.83353
314	low	1	2007-11-02	2007	4	4	2580.55	3.41171	3.63698	15.6863	0	1.65321	1	9.07	9.75	9.84	73.56	74.7965	74.269	2.8775	2.84908	2.74486	2.21787	3.55622	3.69416	16.7825	16.4417	15.7875	55.5608	52.6833	56.2317	8.22772	7.64561	6.83353
315	low	1	2007-11-02	2007	4	4	2580.55	3.41171	3.63698	15.6863	1	1.65321	1	9.07	9.75	9.84	73.56	74.7965	74.269	2.8775	2.84908	2.74486	2.21787	3.55622	3.69416	16.7825	16.4417	15.7875	55.5608	52.6833	56.2317	8.22772	7.64561	6.83353
316	low	1	2007-11-02	2007	4	4	2580.55	3.41171	3.63698	15.6863	0	1.65321	1	9.07	9.75	9.84	73.56	74.7965	74.269	2.8775	2.84908	2.74486	2.21787	3.55622	3.69416	16.7825	16.4417	15.7875	55.5608	52.6833	56.2317	8.22772	7.64561	6.83353
317	low	1	2007-11-02	2007	4	4	2580.55	3.41171	3.63698	15.6863	1	1.65321	1	9.07	9.75	9.84	73.56	74.7965	74.269	2.8775	2.84908	2.74486	2.21787	3.55622	3.69416	16.7825	16.4417	15.7875	55.5608	52.6833	56.2317	8.22772	7.64561	6.83353
318	low	1	2007-11-02	2007	4	4	2580.55	3.41171	3.63698	15.6863	0	1.65321	1	9.07	9.75	9.84	73.56	74.7965	74.269	2.8775	2.84908	2.74486	2.21787	3.55622	3.69416	16.7825	16.4417	15.7875	55.5608	52.6833	56.2317	8.22772	7.64561	6.83353
319	low	1	2007-11-02	2007	4	4	2580.55	3.41171	3.63698	15.6863	1	1.65321	1	9.07	9.75	9.84	73.56	74.7965	74.269	2.8775	2.84908	2.74486	2.21787	3.55622	3.69416	16.7825	16.4417	15.7875	55.5608	52.6833	56.2317	8.22772	7.64561	6.83353
320	low	1	2007-11-02	2007	4	4	2580.55	3.41171	3.63698	15.6863	0	1.65321	1	9.07	9.75	9.84	73.56	74.7965	74.269	2.8775	2.84908	2.74486	2.21787	3.55622	3.69416	16.7825	16.4417	15.7875	55.5608	52.6833	56.2317	8.22772	7.64561	6.83353
321	low	1	2007-11-02	2007	4	4	2580.55	3.41171	3.63698	15.6863	0	1.65321	1	9.07	9.75	9.84	73.56	74.7965	74.269	2.8775	2.84908	2.74486	2.21787	3.55622	3.69416	16.7825	16.4417	15.7875	55.5608	52.6833	56.2317	8.22772	7.64561	6.83353
322	low	1	2007-11-02	2007	4	4	2580.55	3.41171	3.63698	15.6863	1	1.65321	1	9.07	9.75	9.84	73.56	74.7965	74.269	2.8775	2.84908	2.74486	2.21787	3.55622	3.69416	16.7825	16.4417	15.7875	55.5608	52.6833	56.2317	8.22772	7.64561	6.83353
323	low	1	2008-01-28	2008	5	5	5788.59	3.76257	3.41171	24.8619	0	2.18752	4	9.75	9.84	9.31	74.7965	74.269	75.0759	2.84908	2.74486	2.61324	3.55622	3.69416	2.83696	16.4417	15.7875	15.05	52.6833	56.2317	69.1583	7.64561	6.83353	4.47592
324	low	1	2008-01-28	2008	5	5	5788.59	3.76257	3.41171	24.8619	0	2.18752	4	9.75	9.84	9.31	74.7965	74.269	75.0759	2.84908	2.74486	2.61324	3.55622	3.69416	2.83696	16.4417	15.7875	15.05	52.6833	56.2317	69.1583	7.64561	6.83353	4.47592
325	low	1	2008-01-28	2008	5	5	5788.59	3.76257	3.41171	24.8619	1	2.18752	4	9.75	9.84	9.31	74.7965	74.269	75.0759	2.84908	2.74486	2.61324	3.55622	3.69416	2.83696	16.4417	15.7875	15.05	52.6833	56.2317	69.1583	7.64561	6.83353	4.47592
326	low	1	2008-02-25	2008	5	5	5788.59	3.76257	3.41171	24.8619	1	2.11059	4	9.75	9.84	9.31	74.7965	74.269	75.0759	2.84908	2.74486	2.61324	3.55622	3.69416	2.83696	16.4417	15.7875	15.05	52.6833	56.2317	69.1583	7.64561	6.83353	4.47592
327	low	1	2008-02-25	2008	5	5	5788.59	3.76257	3.41171	24.8619	0	2.11059	4	9.75	9.84	9.31	74.7965	74.269	75.0759	2.84908	2.74486	2.61324	3.55622	3.69416	2.83696	16.4417	15.7875	15.05	52.6833	56.2317	69.1583	7.64561	6.83353	4.47592
328	low	1	2008-02-25	2008	5	5	5788.59	3.76257	3.41171	24.8619	0	2.11059	4	9.75	9.84	9.31	74.7965	74.269	75.0759	2.84908	2.74486	2.61324	3.55622	3.69416	2.83696	16.4417	15.7875	15.05	52.6833	56.2317	69.1583	7.64561	6.83353	4.47592
329	low	1	2008-02-25	2008	5	5	5788.59	3.76257	3.41171	24.8619	0	2.11059	4	9.75	9.84	9.31	74.7965	74.269	75.0759	2.84908	2.74486	2.61324	3.55622	3.69416	2.83696	16.4417	15.7875	15.05	52.6833	56.2317	69.1583	7.64561	6.83353	4.47592
330	low	1	2008-02-25	2008	5	5	5788.59	3.76257	3.41171	24.8619	0	2.11059	4	9.75	9.84	9.31	74.7965	74.269	75.0759	2.84908	2.74486	2.61324	3.55622	3.69416	2.83696	16.4417	15.7875	15.05	52.6833	56.2317	69.1583	7.64561	6.83353	4.47592
331	low	1	2008-02-25	2008	5	5	5788.59	3.76257	3.41171	24.8619	0	2.11059	4	9.75	9.84	9.31	74.7965	74.269	75.0759	2.84908	2.74486	2.61324	3.55622	3.69416	2.83696	16.4417	15.7875	15.05	52.6833	56.2317	69.1583	7.64561	6.83353	4.47592
332	low	1	2008-02-25	2008	5	5	5788.59	3.76257	3.41171	24.8619	1	2.11059	4	9.75	9.84	9.31	74.7965	74.269	75.0759	2.84908	2.74486	2.61324	3.55622	3.69416	2.83696	16.4417	15.7875	15.05	52.6833	56.2317	69.1583	7.64561	6.83353	4.47592
333	low	1	2008-02-25	2008	5	5	5788.59	3.76257	3.41171	24.8619	0	2.11059	4	9.75	9.84	9.31	74.7965	74.269	75.0759	2.84908	2.74486	2.61324	3.55622	3.69416	2.83696	16.4417	15.7875	15.05	52.6833	56.2317	69.1583	7.64561	6.83353	4.47592
334	low	1	2008-02-25	2008	5	5	5788.59	3.76257	3.41171	24.8619	0	2.11059	4	9.75	9.84	9.31	74.7965	74.269	75.0759	2.84908	2.74486	2.61324	3.55622	3.69416	2.83696	16.4417	15.7875	15.05	52.6833	56.2317	69.1583	7.64561	6.83353	4.47592
335	low	1	2008-02-25	2008	5	5	5788.59	3.76257	3.41171	24.8619	0	2.11059	4	9.75	9.84	9.31	74.7965	74.269	75.0759	2.84908	2.74486	2.61324	3.55622	3.69416	2.83696	16.4417	15.7875	15.05	52.6833	56.2317	69.1583	7.64561	6.83353	4.47592
336	low	1	2008-02-25	2008	5	5	5788.59	3.76257	3.41171	24.8619	0	2.11059	4	9.75	9.84	9.31	74.7965	74.269	75.0759	2.84908	2.74486	2.61324	3.55622	3.69416	2.83696	16.4417	15.7875	15.05	52.6833	56.2317	69.1583	7.64561	6.83353	4.47592
337	low	1	2008-02-25	2008	5	5	5788.59	3.76257	3.41171	24.8619	0	2.11059	4	9.75	9.84	9.31	74.7965	74.269	75.0759	2.84908	2.74486	2.61324	3.55622	3.69416	2.83696	16.4417	15.7875	15.05	52.6833	56.2317	69.1583	7.64561	6.83353	4.47592
338	low	1	2008-02-25	2008	5	5	5788.59	3.76257	3.41171	24.8619	1	2.11059	4	9.75	9.84	9.31	74.7965	74.269	75.0759	2.84908	2.74486	2.61324	3.55622	3.69416	2.83696	16.4417	15.7875	15.05	52.6833	56.2317	69.1583	7.64561	6.83353	4.47592
339	low	1	2008-02-25	2008	5	5	5788.59	3.76257	3.41171	24.8619	0	2.11059	4	9.75	9.84	9.31	74.7965	74.269	75.0759	2.84908	2.74486	2.61324	3.55622	3.69416	2.83696	16.4417	15.7875	15.05	52.6833	56.2317	69.1583	7.64561	6.83353	4.47592
340	low	1	2008-02-25	2008	5	5	5788.59	3.76257	3.41171	24.8619	0	2.11059	4	9.75	9.84	9.31	74.7965	74.269	75.0759	2.84908	2.74486	2.61324	3.55622	3.69416	2.83696	16.4417	15.7875	15.05	52.6833	56.2317	69.1583	7.64561	6.83353	4.47592
341	low	1	2008-02-25	2008	5	5	5788.59	3.76257	3.41171	24.8619	0	2.11059	4	9.75	9.84	9.31	74.7965	74.269	75.0759	2.84908	2.74486	2.61324	3.55622	3.69416	2.83696	16.4417	15.7875	15.05	52.6833	56.2317	69.1583	7.64561	6.83353	4.47592
342	low	1	2008-02-25	2008	5	5	5788.59	3.76257	3.41171	24.8619	0	2.11059	4	9.75	9.84	9.31	74.7965	74.269	75.0759	2.84908	2.74486	2.61324	3.55622	3.69416	2.83696	16.4417	15.7875	15.05	52.6833	56.2317	69.1583	7.64561	6.83353	4.47592
343	low	1	2008-02-25	2008	5	5	5788.59	3.76257	3.41171	24.8619	0	2.11059	4	9.75	9.84	9.31	74.7965	74.269	75.0759	2.84908	2.74486	2.61324	3.55622	3.69416	2.83696	16.4417	15.7875	15.05	52.6833	56.2317	69.1583	7.64561	6.83353	4.47592
344	low	1	2008-02-25	2008	5	5	5788.59	3.76257	3.41171	24.8619	0	2.11059	4	9.75	9.84	9.31	74.7965	74.269	75.0759	2.84908	2.74486	2.61324	3.55622	3.69416	2.83696	16.4417	15.7875	15.05	52.6833	56.2317	69.1583	7.64561	6.83353	4.47592
345	low	1	2008-02-25	2008	5	5	5788.59	3.76257	3.41171	24.8619	0	2.11059	4	9.75	9.84	9.31	74.7965	74.269	75.0759	2.84908	2.74486	2.61324	3.55622	3.69416	2.83696	16.4417	15.7875	15.05	52.6833	56.2317	69.1583	7.64561	6.83353	4.47592
346	low	1	2008-04-04	2008	5	5	5788.59	3.76257	3.41171	24.8619	1	1.99123	4	9.75	9.84	9.31	74.7965	74.269	75.0759	2.84908	2.74486	2.61324	3.55622	3.69416	2.83696	16.4417	15.7875	15.05	52.6833	56.2317	69.1583	7.64561	6.83353	4.47592
347	low	1	2008-04-04	2008	5	5	5788.59	3.76257	3.41171	24.8619	0	1.99123	4	9.75	9.84	9.31	74.7965	74.269	75.0759	2.84908	2.74486	2.61324	3.55622	3.69416	2.83696	16.4417	15.7875	15.05	52.6833	56.2317	69.1583	7.64561	6.83353	4.47592
348	low	1	2008-04-04	2008	5	5	5788.59	3.76257	3.41171	24.8619	0	1.99123	4	9.75	9.84	9.31	74.7965	74.269	75.0759	2.84908	2.74486	2.61324	3.55622	3.69416	2.83696	16.4417	15.7875	15.05	52.6833	56.2317	69.1583	7.64561	6.83353	4.47592
349	low	1	2008-04-04	2008	5	5	5788.59	3.76257	3.41171	24.8619	0	1.99123	4	9.75	9.84	9.31	74.7965	74.269	75.0759	2.84908	2.74486	2.61324	3.55622	3.69416	2.83696	16.4417	15.7875	15.05	52.6833	56.2317	69.1583	7.64561	6.83353	4.47592
350	low	1	2008-04-04	2008	5	5	5788.59	3.76257	3.41171	24.8619	0	2.11059	4	9.75	9.84	9.31	74.7965	74.269	75.0759	2.84908	2.74486	2.61324	3.55622	3.69416	2.83696	16.4417	15.7875	15.05	52.6833	56.2317	69.1583	7.64561	6.83353	4.47592
351	low	1	2008-04-04	2008	5	5	5788.59	3.76257	3.41171	24.8619	0	1.99123	4	9.75	9.84	9.31	74.7965	74.269	75.0759	2.84908	2.74486	2.61324	3.55622	3.69416	2.83696	16.4417	15.7875	15.05	52.6833	56.2317	69.1583	7.64561	6.83353	4.47592
352	low	1	2008-04-04	2008	5	5	5788.59	3.76257	3.41171	24.8619	0	1.99123	4	9.75	9.84	9.31	74.7965	74.269	75.0759	2.84908	2.74486	2.61324	3.55622	3.69416	2.83696	16.4417	15.7875	15.05	52.6833	56.2317	69.1583	7.64561	6.83353	4.47592
353	low	1	2008-04-04	2008	5	5	5788.59	3.76257	3.41171	24.8619	1	1.99123	4	9.75	9.84	9.31	74.7965	74.269	75.0759	2.84908	2.74486	2.61324	3.55622	3.69416	2.83696	16.4417	15.7875	15.05	52.6833	56.2317	69.1583	7.64561	6.83353	4.47592
354	low	1	2008-04-04	2008	5	5	5788.59	3.76257	3.41171	24.8619	1	1.99123	4	9.75	9.84	9.31	74.7965	74.269	75.0759	2.84908	2.74486	2.61324	3.55622	3.69416	2.83696	16.4417	15.7875	15.05	52.6833	56.2317	69.1583	7.64561	6.83353	4.47592
355	low	1	2008-04-04	2008	5	5	5788.59	3.76257	3.41171	24.8619	0	1.99123	4	9.75	9.84	9.31	74.7965	74.269	75.0759	2.84908	2.74486	2.61324	3.55622	3.69416	2.83696	16.4417	15.7875	15.05	52.6833	56.2317	69.1583	7.64561	6.83353	4.47592
356	low	1	2008-04-04	2008	5	5	5788.59	3.76257	3.41171	24.8619	0	1.99123	4	9.75	9.84	9.31	74.7965	74.269	75.0759	2.84908	2.74486	2.61324	3.55622	3.69416	2.83696	16.4417	15.7875	15.05	52.6833	56.2317	69.1583	7.64561	6.83353	4.47592
357	low	1	2008-04-04	2008	5	5	5788.59	3.76257	3.41171	24.8619	0	1.99123	4	9.75	9.84	9.31	74.7965	74.269	75.0759	2.84908	2.74486	2.61324	3.55622	3.69416	2.83696	16.4417	15.7875	15.05	52.6833	56.2317	69.1583	7.64561	6.83353	4.47592
358	low	1	2008-04-04	2008	5	5	5788.59	3.76257	3.41171	24.8619	0	1.99123	4	9.75	9.84	9.31	74.7965	74.269	75.0759	2.84908	2.74486	2.61324	3.55622	3.69416	2.83696	16.4417	15.7875	15.05	52.6833	56.2317	69.1583	7.64561	6.83353	4.47592
359	low	1	2008-04-04	2008	5	5	5788.59	3.76257	3.41171	24.8619	0	3.57403	4	9.75	9.84	9.31	74.7965	74.269	75.0759	2.84908	2.74486	2.61324	3.55622	3.69416	2.83696	16.4417	15.7875	15.05	52.6833	56.2317	69.1583	7.64561	6.83353	4.47592
360	low	1	2008-04-04	2008	5	5	5788.59	3.76257	3.41171	24.8619	0	1.99123	4	9.75	9.84	9.31	74.7965	74.269	75.0759	2.84908	2.74486	2.61324	3.55622	3.69416	2.83696	16.4417	15.7875	15.05	52.6833	56.2317	69.1583	7.64561	6.83353	4.47592
361	low	1	2008-04-04	2008	5	5	5788.59	3.76257	3.41171	24.8619	0	1.99123	4	9.75	9.84	9.31	74.7965	74.269	75.0759	2.84908	2.74486	2.61324	3.55622	3.69416	2.83696	16.4417	15.7875	15.05	52.6833	56.2317	69.1583	7.64561	6.83353	4.47592
362	low	1	2008-04-04	2008	5	5	5788.59	3.76257	3.41171	24.8619	0	1.99123	4	9.75	9.84	9.31	74.7965	74.269	75.0759	2.84908	2.74486	2.61324	3.55622	3.69416	2.83696	16.4417	15.7875	15.05	52.6833	56.2317	69.1583	7.64561	6.83353	4.47592
363	low	1	2008-04-04	2008	5	5	5788.59	3.76257	3.41171	24.8619	0	1.99123	4	9.75	9.84	9.31	74.7965	74.269	75.0759	2.84908	2.74486	2.61324	3.55622	3.69416	2.83696	16.4417	15.7875	15.05	52.6833	56.2317	69.1583	7.64561	6.83353	4.47592
364	low	1	2008-04-04	2008	5	5	5788.59	3.76257	3.41171	24.8619	0	1.99123	4	9.75	9.84	9.31	74.7965	74.269	75.0759	2.84908	2.74486	2.61324	3.55622	3.69416	2.83696	16.4417	15.7875	15.05	52.6833	56.2317	69.1583	7.64561	6.83353	4.47592
365	low	1	2008-04-04	2008	5	5	5788.59	3.76257	3.41171	24.8619	1	1.99123	4	9.75	9.84	9.31	74.7965	74.269	75.0759	2.84908	2.74486	2.61324	3.55622	3.69416	2.83696	16.4417	15.7875	15.05	52.6833	56.2317	69.1583	7.64561	6.83353	4.47592
366	low	1	2008-04-25	2008	5	5	5788.59	3.76257	3.41171	24.8619	1	1.93952	4	9.75	9.84	9.31	74.7965	74.269	75.0759	2.84908	2.74486	2.61324	3.55622	3.69416	2.83696	16.4417	15.7875	15.05	52.6833	56.2317	69.1583	7.64561	6.83353	4.47592
367	low	1	2008-04-25	2008	5	5	5788.59	3.76257	3.41171	24.8619	0	1.93952	4	9.75	9.84	9.31	74.7965	74.269	75.0759	2.84908	2.74486	2.61324	3.55622	3.69416	2.83696	16.4417	15.7875	15.05	52.6833	56.2317	69.1583	7.64561	6.83353	4.47592
368	low	1	2008-04-25	2008	5	5	5788.59	3.76257	3.41171	24.8619	0	1.93952	4	9.75	9.84	9.31	74.7965	74.269	75.0759	2.84908	2.74486	2.61324	3.55622	3.69416	2.83696	16.4417	15.7875	15.05	52.6833	56.2317	69.1583	7.64561	6.83353	4.47592
369	low	1	2008-04-25	2008	5	5	5788.59	3.76257	3.41171	24.8619	0	1.93952	4	9.75	9.84	9.31	74.7965	74.269	75.0759	2.84908	2.74486	2.61324	3.55622	3.69416	2.83696	16.4417	15.7875	15.05	52.6833	56.2317	69.1583	7.64561	6.83353	4.47592
370	low	1	2008-04-25	2008	5	5	5788.59	3.76257	3.41171	24.8619	1	1.93952	4	9.75	9.84	9.31	74.7965	74.269	75.0759	2.84908	2.74486	2.61324	3.55622	3.69416	2.83696	16.4417	15.7875	15.05	52.6833	56.2317	69.1583	7.64561	6.83353	4.47592
371	low	1	2008-04-25	2008	5	5	5788.59	3.76257	3.41171	24.8619	0	1.93952	4	9.75	9.84	9.31	74.7965	74.269	75.0759	2.84908	2.74486	2.61324	3.55622	3.69416	2.83696	16.4417	15.7875	15.05	52.6833	56.2317	69.1583	7.64561	6.83353	4.47592
372	low	1	2008-04-25	2008	5	5	5788.59	3.76257	3.41171	24.8619	1	1.93952	4	9.75	9.84	9.31	74.7965	74.269	75.0759	2.84908	2.74486	2.61324	3.55622	3.69416	2.83696	16.4417	15.7875	15.05	52.6833	56.2317	69.1583	7.64561	6.83353	4.47592
373	low	1	2008-04-25	2008	5	5	5788.59	3.76257	3.41171	24.8619	0	1.93952	4	9.75	9.84	9.31	74.7965	74.269	75.0759	2.84908	2.74486	2.61324	3.55622	3.69416	2.83696	16.4417	15.7875	15.05	52.6833	56.2317	69.1583	7.64561	6.83353	4.47592
374	low	1	2008-04-25	2008	5	5	5788.59	3.76257	3.41171	24.8619	0	1.93952	4	9.75	9.84	9.31	74.7965	74.269	75.0759	2.84908	2.74486	2.61324	3.55622	3.69416	2.83696	16.4417	15.7875	15.05	52.6833	56.2317	69.1583	7.64561	6.83353	4.47592
375	low	1	2008-04-25	2008	5	5	5788.59	3.76257	3.41171	24.8619	0	1.93952	4	9.75	9.84	9.31	74.7965	74.269	75.0759	2.84908	2.74486	2.61324	3.55622	3.69416	2.83696	16.4417	15.7875	15.05	52.6833	56.2317	69.1583	7.64561	6.83353	4.47592
376	low	1	2008-04-25	2008	5	5	5788.59	3.76257	3.41171	24.8619	0	1.93952	4	9.75	9.84	9.31	74.7965	74.269	75.0759	2.84908	2.74486	2.61324	3.55622	3.69416	2.83696	16.4417	15.7875	15.05	52.6833	56.2317	69.1583	7.64561	6.83353	4.47592
377	low	1	2008-04-25	2008	5	5	5788.59	3.76257	3.41171	24.8619	0	1.93952	4	9.75	9.84	9.31	74.7965	74.269	75.0759	2.84908	2.74486	2.61324	3.55622	3.69416	2.83696	16.4417	15.7875	15.05	52.6833	56.2317	69.1583	7.64561	6.83353	4.47592
378	low	1	2008-04-25	2008	5	5	5788.59	3.76257	3.41171	24.8619	0	1.93952	4	9.75	9.84	9.31	74.7965	74.269	75.0759	2.84908	2.74486	2.61324	3.55622	3.69416	2.83696	16.4417	15.7875	15.05	52.6833	56.2317	69.1583	7.64561	6.83353	4.47592
379	low	1	2008-04-25	2008	5	5	5788.59	3.76257	3.41171	24.8619	1	1.93952	4	9.75	9.84	9.31	74.7965	74.269	75.0759	2.84908	2.74486	2.61324	3.55622	3.69416	2.83696	16.4417	15.7875	15.05	52.6833	56.2317	69.1583	7.64561	6.83353	4.47592
380	low	1	2008-04-25	2008	5	5	5788.59	3.76257	3.41171	24.8619	0	1.93952	4	9.75	9.84	9.31	74.7965	74.269	75.0759	2.84908	2.74486	2.61324	3.55622	3.69416	2.83696	16.4417	15.7875	15.05	52.6833	56.2317	69.1583	7.64561	6.83353	4.47592
381	low	1	2008-04-25	2008	5	5	5788.59	3.76257	3.41171	24.8619	1	1.93952	4	9.75	9.84	9.31	74.7965	74.269	75.0759	2.84908	2.74486	2.61324	3.55622	3.69416	2.83696	16.4417	15.7875	15.05	52.6833	56.2317	69.1583	7.64561	6.83353	4.47592
382	low	1	2008-04-25	2008	5	5	5788.59	3.76257	3.41171	24.8619	1	1.93952	4	9.75	9.84	9.31	74.7965	74.269	75.0759	2.84908	2.74486	2.61324	3.55622	3.69416	2.83696	16.4417	15.7875	15.05	52.6833	56.2317	69.1583	7.64561	6.83353	4.47592
383	low	1	2008-04-25	2008	5	5	5788.59	3.76257	3.41171	24.8619	0	1.93952	4	9.75	9.84	9.31	74.7965	74.269	75.0759	2.84908	2.74486	2.61324	3.55622	3.69416	2.83696	16.4417	15.7875	15.05	52.6833	56.2317	69.1583	7.64561	6.83353	4.47592
384	low	1	2008-04-25	2008	5	5	5788.59	3.76257	3.41171	24.8619	1	1.93952	4	9.75	9.84	9.31	74.7965	74.269	75.0759	2.84908	2.74486	2.61324	3.55622	3.69416	2.83696	16.4417	15.7875	15.05	52.6833	56.2317	69.1583	7.64561	6.83353	4.47592
385	low	1	2008-04-25	2008	5	5	5788.59	3.76257	3.41171	24.8619	0	1.93952	4	9.75	9.84	9.31	74.7965	74.269	75.0759	2.84908	2.74486	2.61324	3.55622	3.69416	2.83696	16.4417	15.7875	15.05	52.6833	56.2317	69.1583	7.64561	6.83353	4.47592
386	low	1	2008-05-28	2008	5	5	5788.59	3.76257	3.41171	24.8619	0	2.7364	4	9.75	9.84	9.31	74.7965	74.269	75.0759	2.84908	2.74486	2.61324	3.55622	3.69416	2.83696	16.4417	15.7875	15.05	52.6833	56.2317	69.1583	7.64561	6.83353	4.47592
387	low	1	2008-05-28	2008	5	5	5788.59	3.76257	3.41171	24.8619	0	2.7364	4	9.75	9.84	9.31	74.7965	74.269	75.0759	2.84908	2.74486	2.61324	3.55622	3.69416	2.83696	16.4417	15.7875	15.05	52.6833	56.2317	69.1583	7.64561	6.83353	4.47592
388	low	1	2008-05-28	2008	5	5	5788.59	3.76257	3.41171	24.8619	0	2.7364	4	9.75	9.84	9.31	74.7965	74.269	75.0759	2.84908	2.74486	2.61324	3.55622	3.69416	2.83696	16.4417	15.7875	15.05	52.6833	56.2317	69.1583	7.64561	6.83353	4.47592
389	low	1	2008-05-28	2008	5	5	5788.59	3.76257	3.41171	24.8619	0	2.7364	4	9.75	9.84	9.31	74.7965	74.269	75.0759	2.84908	2.74486	2.61324	3.55622	3.69416	2.83696	16.4417	15.7875	15.05	52.6833	56.2317	69.1583	7.64561	6.83353	4.47592
390	low	1	2008-05-28	2008	5	5	5788.59	3.76257	3.41171	24.8619	0	2.7364	4	9.75	9.84	9.31	74.7965	74.269	75.0759	2.84908	2.74486	2.61324	3.55622	3.69416	2.83696	16.4417	15.7875	15.05	52.6833	56.2317	69.1583	7.64561	6.83353	4.47592
391	low	1	2008-05-28	2008	5	5	5788.59	3.76257	3.41171	24.8619	1	2.7364	4	9.75	9.84	9.31	74.7965	74.269	75.0759	2.84908	2.74486	2.61324	3.55622	3.69416	2.83696	16.4417	15.7875	15.05	52.6833	56.2317	69.1583	7.64561	6.83353	4.47592
392	low	1	2008-05-28	2008	5	5	5788.59	3.76257	3.41171	24.8619	0	2.7364	4	9.75	9.84	9.31	74.7965	74.269	75.0759	2.84908	2.74486	2.61324	3.55622	3.69416	2.83696	16.4417	15.7875	15.05	52.6833	56.2317	69.1583	7.64561	6.83353	4.47592
393	low	1	2008-05-28	2008	5	5	5788.59	3.76257	3.41171	24.8619	1	2.7364	4	9.75	9.84	9.31	74.7965	74.269	75.0759	2.84908	2.74486	2.61324	3.55622	3.69416	2.83696	16.4417	15.7875	15.05	52.6833	56.2317	69.1583	7.64561	6.83353	4.47592
394	low	1	2008-05-28	2008	5	5	5788.59	3.76257	3.41171	24.8619	0	2.7364	4	9.75	9.84	9.31	74.7965	74.269	75.0759	2.84908	2.74486	2.61324	3.55622	3.69416	2.83696	16.4417	15.7875	15.05	52.6833	56.2317	69.1583	7.64561	6.83353	4.47592
395	low	1	2008-05-28	2008	5	5	5788.59	3.76257	3.41171	24.8619	0	2.7364	4	9.75	9.84	9.31	74.7965	74.269	75.0759	2.84908	2.74486	2.61324	3.55622	3.69416	2.83696	16.4417	15.7875	15.05	52.6833	56.2317	69.1583	7.64561	6.83353	4.47592
396	low	1	2008-05-28	2008	5	5	5788.59	3.76257	3.41171	24.8619	0	2.7364	4	9.75	9.84	9.31	74.7965	74.269	75.0759	2.84908	2.74486	2.61324	3.55622	3.69416	2.83696	16.4417	15.7875	15.05	52.6833	56.2317	69.1583	7.64561	6.83353	4.47592
397	low	1	2008-05-28	2008	5	5	5788.59	3.76257	3.41171	24.8619	0	2.7364	4	9.75	9.84	9.31	74.7965	74.269	75.0759	2.84908	2.74486	2.61324	3.55622	3.69416	2.83696	16.4417	15.7875	15.05	52.6833	56.2317	69.1583	7.64561	6.83353	4.47592
398	low	1	2008-05-28	2008	5	5	5788.59	3.76257	3.41171	24.8619	0	2.7364	4	9.75	9.84	9.31	74.7965	74.269	75.0759	2.84908	2.74486	2.61324	3.55622	3.69416	2.83696	16.4417	15.7875	15.05	52.6833	56.2317	69.1583	7.64561	6.83353	4.47592
399	low	1	2008-05-28	2008	5	5	5788.59	3.76257	3.41171	24.8619	0	2.7364	4	9.75	9.84	9.31	74.7965	74.269	75.0759	2.84908	2.74486	2.61324	3.55622	3.69416	2.83696	16.4417	15.7875	15.05	52.6833	56.2317	69.1583	7.64561	6.83353	4.47592
400	low	1	2008-05-28	2008	5	5	5788.59	3.76257	3.41171	24.8619	1	2.7364	4	9.75	9.84	9.31	74.7965	74.269	75.0759	2.84908	2.74486	2.61324	3.55622	3.69416	2.83696	16.4417	15.7875	15.05	52.6833	56.2317	69.1583	7.64561	6.83353	4.47592
401	low	1	2008-05-28	2008	5	5	5788.59	3.76257	3.41171	24.8619	0	2.7364	4	9.75	9.84	9.31	74.7965	74.269	75.0759	2.84908	2.74486	2.61324	3.55622	3.69416	2.83696	16.4417	15.7875	15.05	52.6833	56.2317	69.1583	7.64561	6.83353	4.47592
402	low	1	2008-05-28	2008	5	5	5788.59	3.76257	3.41171	24.8619	0	2.7364	4	9.75	9.84	9.31	74.7965	74.269	75.0759	2.84908	2.74486	2.61324	3.55622	3.69416	2.83696	16.4417	15.7875	15.05	52.6833	56.2317	69.1583	7.64561	6.83353	4.47592
403	low	1	2008-05-28	2008	5	5	5788.59	3.76257	3.41171	24.8619	0	2.7364	4	9.75	9.84	9.31	74.7965	74.269	75.0759	2.84908	2.74486	2.61324	3.55622	3.69416	2.83696	16.4417	15.7875	15.05	52.6833	56.2317	69.1583	7.64561	6.83353	4.47592
404	low	1	2008-05-28	2008	5	5	5788.59	3.76257	3.41171	24.8619	0	2.7364	4	9.75	9.84	9.31	74.7965	74.269	75.0759	2.84908	2.74486	2.61324	3.55622	3.69416	2.83696	16.4417	15.7875	15.05	52.6833	56.2317	69.1583	7.64561	6.83353	4.47592
405	low	1	2008-05-28	2008	5	5	5788.59	3.76257	3.41171	24.8619	0	2.7364	4	9.75	9.84	9.31	74.7965	74.269	75.0759	2.84908	2.74486	2.61324	3.55622	3.69416	2.83696	16.4417	15.7875	15.05	52.6833	56.2317	69.1583	7.64561	6.83353	4.47592
406	low	1	2008-06-25	2008	5	5	5788.59	3.76257	3.41171	24.8619	0	2.73159	4	9.75	9.84	9.31	74.7965	74.269	75.0759	2.84908	2.74486	2.61324	3.55622	3.69416	2.83696	16.4417	15.7875	15.05	52.6833	56.2317	69.1583	7.64561	6.83353	4.47592
407	low	1	2008-06-25	2008	5	5	5788.59	3.76257	3.41171	24.8619	0	2.73159	4	9.75	9.84	9.31	74.7965	74.269	75.0759	2.84908	2.74486	2.61324	3.55622	3.69416	2.83696	16.4417	15.7875	15.05	52.6833	56.2317	69.1583	7.64561	6.83353	4.47592
408	low	1	2008-06-25	2008	5	5	5788.59	3.76257	3.41171	24.8619	0	2.73159	4	9.75	9.84	9.31	74.7965	74.269	75.0759	2.84908	2.74486	2.61324	3.55622	3.69416	2.83696	16.4417	15.7875	15.05	52.6833	56.2317	69.1583	7.64561	6.83353	4.47592
409	low	1	2008-06-25	2008	5	5	5788.59	3.76257	3.41171	24.8619	0	2.73159	4	9.75	9.84	9.31	74.7965	74.269	75.0759	2.84908	2.74486	2.61324	3.55622	3.69416	2.83696	16.4417	15.7875	15.05	52.6833	56.2317	69.1583	7.64561	6.83353	4.47592
410	low	1	2008-06-25	2008	5	5	5788.59	3.76257	3.41171	24.8619	0	2.73159	4	9.75	9.84	9.31	74.7965	74.269	75.0759	2.84908	2.74486	2.61324	3.55622	3.69416	2.83696	16.4417	15.7875	15.05	52.6833	56.2317	69.1583	7.64561	6.83353	4.47592
411	low	1	2008-06-25	2008	5	5	5788.59	3.76257	3.41171	24.8619	1	2.73159	4	9.75	9.84	9.31	74.7965	74.269	75.0759	2.84908	2.74486	2.61324	3.55622	3.69416	2.83696	16.4417	15.7875	15.05	52.6833	56.2317	69.1583	7.64561	6.83353	4.47592
412	low	1	2008-06-25	2008	5	5	5788.59	3.76257	3.41171	24.8619	1	2.73159	4	9.75	9.84	9.31	74.7965	74.269	75.0759	2.84908	2.74486	2.61324	3.55622	3.69416	2.83696	16.4417	15.7875	15.05	52.6833	56.2317	69.1583	7.64561	6.83353	4.47592
413	low	1	2008-06-25	2008	5	5	5788.59	3.76257	3.41171	24.8619	1	2.73159	4	9.75	9.84	9.31	74.7965	74.269	75.0759	2.84908	2.74486	2.61324	3.55622	3.69416	2.83696	16.4417	15.7875	15.05	52.6833	56.2317	69.1583	7.64561	6.83353	4.47592
414	low	1	2008-06-25	2008	5	5	5788.59	3.76257	3.41171	24.8619	1	2.73159	4	9.75	9.84	9.31	74.7965	74.269	75.0759	2.84908	2.74486	2.61324	3.55622	3.69416	2.83696	16.4417	15.7875	15.05	52.6833	56.2317	69.1583	7.64561	6.83353	4.47592
415	low	1	2008-06-25	2008	5	5	5788.59	3.76257	3.41171	24.8619	0	2.73159	4	9.75	9.84	9.31	74.7965	74.269	75.0759	2.84908	2.74486	2.61324	3.55622	3.69416	2.83696	16.4417	15.7875	15.05	52.6833	56.2317	69.1583	7.64561	6.83353	4.47592
416	low	1	2008-06-25	2008	5	5	5788.59	3.76257	3.41171	24.8619	0	2.73159	4	9.75	9.84	9.31	74.7965	74.269	75.0759	2.84908	2.74486	2.61324	3.55622	3.69416	2.83696	16.4417	15.7875	15.05	52.6833	56.2317	69.1583	7.64561	6.83353	4.47592
417	low	1	2008-06-25	2008	5	5	5788.59	3.76257	3.41171	24.8619	0	2.73159	4	9.75	9.84	9.31	74.7965	74.269	75.0759	2.84908	2.74486	2.61324	3.55622	3.69416	2.83696	16.4417	15.7875	15.05	52.6833	56.2317	69.1583	7.64561	6.83353	4.47592
418	low	1	2008-06-25	2008	5	5	5788.59	3.76257	3.41171	24.8619	1	2.73159	4	9.75	9.84	9.31	74.7965	74.269	75.0759	2.84908	2.74486	2.61324	3.55622	3.69416	2.83696	16.4417	15.7875	15.05	52.6833	56.2317	69.1583	7.64561	6.83353	4.47592
419	low	1	2008-06-25	2008	5	5	5788.59	3.76257	3.41171	24.8619	1	2.73159	4	9.75	9.84	9.31	74.7965	74.269	75.0759	2.84908	2.74486	2.61324	3.55622	3.69416	2.83696	16.4417	15.7875	15.05	52.6833	56.2317	69.1583	7.64561	6.83353	4.47592
420	low	1	2008-06-25	2008	5	5	5788.59	3.76257	3.41171	24.8619	0	2.73159	4	9.75	9.84	9.31	74.7965	74.269	75.0759	2.84908	2.74486	2.61324	3.55622	3.69416	2.83696	16.4417	15.7875	15.05	52.6833	56.2317	69.1583	7.64561	6.83353	4.47592
421	low	1	2008-06-25	2008	5	5	5788.59	3.76257	3.41171	24.8619	0	2.73159	4	9.75	9.84	9.31	74.7965	74.269	75.0759	2.84908	2.74486	2.61324	3.55622	3.69416	2.83696	16.4417	15.7875	15.05	52.6833	56.2317	69.1583	7.64561	6.83353	4.47592
422	low	1	2008-06-25	2008	5	5	5788.59	3.76257	3.41171	24.8619	0	2.73159	4	9.75	9.84	9.31	74.7965	74.269	75.0759	2.84908	2.74486	2.61324	3.55622	3.69416	2.83696	16.4417	15.7875	15.05	52.6833	56.2317	69.1583	7.64561	6.83353	4.47592
423	low	1	2008-06-25	2008	5	5	5788.59	3.76257	3.41171	24.8619	0	2.73159	4	9.75	9.84	9.31	74.7965	74.269	75.0759	2.84908	2.74486	2.61324	3.55622	3.69416	2.83696	16.4417	15.7875	15.05	52.6833	56.2317	69.1583	7.64561	6.83353	4.47592
424	low	1	2008-06-25	2008	5	5	5788.59	3.76257	3.41171	24.8619	0	2.73159	4	9.75	9.84	9.31	74.7965	74.269	75.0759	2.84908	2.74486	2.61324	3.55622	3.69416	2.83696	16.4417	15.7875	15.05	52.6833	56.2317	69.1583	7.64561	6.83353	4.47592
425	low	1	2008-06-25	2008	5	5	5788.59	3.76257	3.41171	24.8619	0	2.73159	4	9.75	9.84	9.31	74.7965	74.269	75.0759	2.84908	2.74486	2.61324	3.55622	3.69416	2.83696	16.4417	15.7875	15.05	52.6833	56.2317	69.1583	7.64561	6.83353	4.47592
426	low	1	2008-07-24	2008	5	5	5788.59	3.76257	3.41171	24.8619	1	2.87448	4	9.75	9.84	9.31	74.7965	74.269	75.0759	2.84908	2.74486	2.61324	3.55622	3.69416	2.83696	16.4417	15.7875	15.05	52.6833	56.2317	69.1583	7.64561	6.83353	4.47592
427	low	1	2008-07-24	2008	5	5	5788.59	3.76257	3.41171	24.8619	0	2.87448	4	9.75	9.84	9.31	74.7965	74.269	75.0759	2.84908	2.74486	2.61324	3.55622	3.69416	2.83696	16.4417	15.7875	15.05	52.6833	56.2317	69.1583	7.64561	6.83353	4.47592
428	low	1	2008-07-24	2008	5	5	5788.59	3.76257	3.41171	24.8619	1	2.87448	4	9.75	9.84	9.31	74.7965	74.269	75.0759	2.84908	2.74486	2.61324	3.55622	3.69416	2.83696	16.4417	15.7875	15.05	52.6833	56.2317	69.1583	7.64561	6.83353	4.47592
429	low	1	2008-07-24	2008	5	5	5788.59	3.76257	3.41171	24.8619	0	2.87448	4	9.75	9.84	9.31	74.7965	74.269	75.0759	2.84908	2.74486	2.61324	3.55622	3.69416	2.83696	16.4417	15.7875	15.05	52.6833	56.2317	69.1583	7.64561	6.83353	4.47592
430	low	1	2008-07-24	2008	5	5	5788.59	3.76257	3.41171	24.8619	1	2.87448	4	9.75	9.84	9.31	74.7965	74.269	75.0759	2.84908	2.74486	2.61324	3.55622	3.69416	2.83696	16.4417	15.7875	15.05	52.6833	56.2317	69.1583	7.64561	6.83353	4.47592
431	low	1	2008-07-24	2008	5	5	5788.59	3.76257	3.41171	24.8619	1	2.87448	4	9.75	9.84	9.31	74.7965	74.269	75.0759	2.84908	2.74486	2.61324	3.55622	3.69416	2.83696	16.4417	15.7875	15.05	52.6833	56.2317	69.1583	7.64561	6.83353	4.47592
432	low	1	2008-07-24	2008	5	5	5788.59	3.76257	3.41171	24.8619	0	2.87448	4	9.75	9.84	9.31	74.7965	74.269	75.0759	2.84908	2.74486	2.61324	3.55622	3.69416	2.83696	16.4417	15.7875	15.05	52.6833	56.2317	69.1583	7.64561	6.83353	4.47592
433	low	1	2008-07-24	2008	5	5	5788.59	3.76257	3.41171	24.8619	1	2.87448	4	9.75	9.84	9.31	74.7965	74.269	75.0759	2.84908	2.74486	2.61324	3.55622	3.69416	2.83696	16.4417	15.7875	15.05	52.6833	56.2317	69.1583	7.64561	6.83353	4.47592
434	low	1	2008-07-24	2008	5	5	5788.59	3.76257	3.41171	24.8619	1	2.87448	4	9.75	9.84	9.31	74.7965	74.269	75.0759	2.84908	2.74486	2.61324	3.55622	3.69416	2.83696	16.4417	15.7875	15.05	52.6833	56.2317	69.1583	7.64561	6.83353	4.47592
435	low	1	2008-07-24	2008	5	5	5788.59	3.76257	3.41171	24.8619	0	2.87448	4	9.75	9.84	9.31	74.7965	74.269	75.0759	2.84908	2.74486	2.61324	3.55622	3.69416	2.83696	16.4417	15.7875	15.05	52.6833	56.2317	69.1583	7.64561	6.83353	4.47592
436	low	1	2008-07-24	2008	5	5	5788.59	3.76257	3.41171	24.8619	1	2.87448	4	9.75	9.84	9.31	74.7965	74.269	75.0759	2.84908	2.74486	2.61324	3.55622	3.69416	2.83696	16.4417	15.7875	15.05	52.6833	56.2317	69.1583	7.64561	6.83353	4.47592
437	low	1	2008-07-24	2008	5	5	5788.59	3.76257	3.41171	24.8619	0	2.87448	4	9.75	9.84	9.31	74.7965	74.269	75.0759	2.84908	2.74486	2.61324	3.55622	3.69416	2.83696	16.4417	15.7875	15.05	52.6833	56.2317	69.1583	7.64561	6.83353	4.47592
438	low	1	2008-07-24	2008	5	5	5788.59	3.76257	3.41171	24.8619	0	2.87448	4	9.75	9.84	9.31	74.7965	74.269	75.0759	2.84908	2.74486	2.61324	3.55622	3.69416	2.83696	16.4417	15.7875	15.05	52.6833	56.2317	69.1583	7.64561	6.83353	4.47592
439	low	1	2008-07-24	2008	5	5	5788.59	3.76257	3.41171	24.8619	0	2.87448	4	9.75	9.84	9.31	74.7965	74.269	75.0759	2.84908	2.74486	2.61324	3.55622	3.69416	2.83696	16.4417	15.7875	15.05	52.6833	56.2317	69.1583	7.64561	6.83353	4.47592
440	low	1	2008-07-24	2008	5	5	5788.59	3.76257	3.41171	24.8619	0	2.87448	4	9.75	9.84	9.31	74.7965	74.269	75.0759	2.84908	2.74486	2.61324	3.55622	3.69416	2.83696	16.4417	15.7875	15.05	52.6833	56.2317	69.1583	7.64561	6.83353	4.47592
441	low	1	2008-07-24	2008	5	5	5788.59	3.76257	3.41171	24.8619	1	2.87448	4	9.75	9.84	9.31	74.7965	74.269	75.0759	2.84908	2.74486	2.61324	3.55622	3.69416	2.83696	16.4417	15.7875	15.05	52.6833	56.2317	69.1583	7.64561	6.83353	4.47592
442	low	1	2008-07-24	2008	5	5	5788.59	3.76257	3.41171	24.8619	1	2.87448	4	9.75	9.84	9.31	74.7965	74.269	75.0759	2.84908	2.74486	2.61324	3.55622	3.69416	2.83696	16.4417	15.7875	15.05	52.6833	56.2317	69.1583	7.64561	6.83353	4.47592
443	low	1	2008-07-24	2008	5	5	5788.59	3.76257	3.41171	24.8619	0	2.87448	4	9.75	9.84	9.31	74.7965	74.269	75.0759	2.84908	2.74486	2.61324	3.55622	3.69416	2.83696	16.4417	15.7875	15.05	52.6833	56.2317	69.1583	7.64561	6.83353	4.47592
444	low	1	2008-08-26	2008	5	5	5788.59	3.76257	3.41171	24.8619	0	3.06521	4	9.75	9.84	9.31	74.7965	74.269	75.0759	2.84908	2.74486	2.61324	3.55622	3.69416	2.83696	16.4417	15.7875	15.05	52.6833	56.2317	69.1583	7.64561	6.83353	4.47592
445	low	1	2008-08-26	2008	5	5	5788.59	3.76257	3.41171	24.8619	0	3.06521	4	9.75	9.84	9.31	74.7965	74.269	75.0759	2.84908	2.74486	2.61324	3.55622	3.69416	2.83696	16.4417	15.7875	15.05	52.6833	56.2317	69.1583	7.64561	6.83353	4.47592
446	low	1	2008-08-26	2008	5	5	5788.59	3.76257	3.41171	24.8619	1	3.06521	4	9.75	9.84	9.31	74.7965	74.269	75.0759	2.84908	2.74486	2.61324	3.55622	3.69416	2.83696	16.4417	15.7875	15.05	52.6833	56.2317	69.1583	7.64561	6.83353	4.47592
447	low	1	2008-08-26	2008	5	5	5788.59	3.76257	3.41171	24.8619	0	3.06521	4	9.75	9.84	9.31	74.7965	74.269	75.0759	2.84908	2.74486	2.61324	3.55622	3.69416	2.83696	16.4417	15.7875	15.05	52.6833	56.2317	69.1583	7.64561	6.83353	4.47592
448	low	1	2008-08-26	2008	5	5	5788.59	3.76257	3.41171	24.8619	0	3.06521	4	9.75	9.84	9.31	74.7965	74.269	75.0759	2.84908	2.74486	2.61324	3.55622	3.69416	2.83696	16.4417	15.7875	15.05	52.6833	56.2317	69.1583	7.64561	6.83353	4.47592
449	low	1	2008-08-26	2008	5	5	5788.59	3.76257	3.41171	24.8619	1	3.06521	4	9.75	9.84	9.31	74.7965	74.269	75.0759	2.84908	2.74486	2.61324	3.55622	3.69416	2.83696	16.4417	15.7875	15.05	52.6833	56.2317	69.1583	7.64561	6.83353	4.47592
450	low	1	2008-08-26	2008	5	5	5788.59	3.76257	3.41171	24.8619	0	3.06521	4	9.75	9.84	9.31	74.7965	74.269	75.0759	2.84908	2.74486	2.61324	3.55622	3.69416	2.83696	16.4417	15.7875	15.05	52.6833	56.2317	69.1583	7.64561	6.83353	4.47592
451	low	1	2008-08-26	2008	5	5	5788.59	3.76257	3.41171	24.8619	0	3.06521	4	9.75	9.84	9.31	74.7965	74.269	75.0759	2.84908	2.74486	2.61324	3.55622	3.69416	2.83696	16.4417	15.7875	15.05	52.6833	56.2317	69.1583	7.64561	6.83353	4.47592
452	low	1	2008-08-26	2008	5	5	5788.59	3.76257	3.41171	24.8619	0	3.06521	4	9.75	9.84	9.31	74.7965	74.269	75.0759	2.84908	2.74486	2.61324	3.55622	3.69416	2.83696	16.4417	15.7875	15.05	52.6833	56.2317	69.1583	7.64561	6.83353	4.47592
453	low	1	2008-08-26	2008	5	5	5788.59	3.76257	3.41171	24.8619	0	3.06521	4	9.75	9.84	9.31	74.7965	74.269	75.0759	2.84908	2.74486	2.61324	3.55622	3.69416	2.83696	16.4417	15.7875	15.05	52.6833	56.2317	69.1583	7.64561	6.83353	4.47592
454	low	1	2008-08-26	2008	5	5	5788.59	3.76257	3.41171	24.8619	1	3.06521	4	9.75	9.84	9.31	74.7965	74.269	75.0759	2.84908	2.74486	2.61324	3.55622	3.69416	2.83696	16.4417	15.7875	15.05	52.6833	56.2317	69.1583	7.64561	6.83353	4.47592
455	low	1	2008-08-26	2008	5	5	5788.59	3.76257	3.41171	24.8619	0	3.06521	4	9.75	9.84	9.31	74.7965	74.269	75.0759	2.84908	2.74486	2.61324	3.55622	3.69416	2.83696	16.4417	15.7875	15.05	52.6833	56.2317	69.1583	7.64561	6.83353	4.47592
456	low	1	2008-08-26	2008	5	5	5788.59	3.76257	3.41171	24.8619	0	3.06521	4	9.75	9.84	9.31	74.7965	74.269	75.0759	2.84908	2.74486	2.61324	3.55622	3.69416	2.83696	16.4417	15.7875	15.05	52.6833	56.2317	69.1583	7.64561	6.83353	4.47592
457	low	1	2008-08-26	2008	5	5	5788.59	3.76257	3.41171	24.8619	0	3.06521	4	9.75	9.84	9.31	74.7965	74.269	75.0759	2.84908	2.74486	2.61324	3.55622	3.69416	2.83696	16.4417	15.7875	15.05	52.6833	56.2317	69.1583	7.64561	6.83353	4.47592
458	low	1	2008-08-26	2008	5	5	5788.59	3.76257	3.41171	24.8619	0	3.06521	4	9.75	9.84	9.31	74.7965	74.269	75.0759	2.84908	2.74486	2.61324	3.55622	3.69416	2.83696	16.4417	15.7875	15.05	52.6833	56.2317	69.1583	7.64561	6.83353	4.47592
459	low	1	2008-08-26	2008	5	5	5788.59	3.76257	3.41171	24.8619	0	3.06521	4	9.75	9.84	9.31	74.7965	74.269	75.0759	2.84908	2.74486	2.61324	3.55622	3.69416	2.83696	16.4417	15.7875	15.05	52.6833	56.2317	69.1583	7.64561	6.83353	4.47592
460	low	1	2008-08-26	2008	5	5	5788.59	3.76257	3.41171	24.8619	0	3.06521	4	9.75	9.84	9.31	74.7965	74.269	75.0759	2.84908	2.74486	2.61324	3.55622	3.69416	2.83696	16.4417	15.7875	15.05	52.6833	56.2317	69.1583	7.64561	6.83353	4.47592
461	low	1	2008-08-26	2008	5	5	5788.59	3.76257	3.41171	24.8619	0	3.06521	4	9.75	9.84	9.31	74.7965	74.269	75.0759	2.84908	2.74486	2.61324	3.55622	3.69416	2.83696	16.4417	15.7875	15.05	52.6833	56.2317	69.1583	7.64561	6.83353	4.47592
462	low	1	2008-08-26	2008	5	5	5788.59	3.76257	3.41171	24.8619	0	3.06521	4	9.75	9.84	9.31	74.7965	74.269	75.0759	2.84908	2.74486	2.61324	3.55622	3.69416	2.83696	16.4417	15.7875	15.05	52.6833	56.2317	69.1583	7.64561	6.83353	4.47592
463	low	1	2008-08-26	2008	5	5	5788.59	3.76257	3.41171	24.8619	0	3.06521	4	9.75	9.84	9.31	74.7965	74.269	75.0759	2.84908	2.74486	2.61324	3.55622	3.69416	2.83696	16.4417	15.7875	15.05	52.6833	56.2317	69.1583	7.64561	6.83353	4.47592
464	low	1	2008-09-10	2008	5	5	5788.59	3.76257	3.41171	24.8619	1	3.0607	4	9.75	9.84	9.31	74.7965	74.269	75.0759	2.84908	2.74486	2.61324	3.55622	3.69416	2.83696	16.4417	15.7875	15.05	52.6833	56.2317	69.1583	7.64561	6.83353	4.47592
465	low	1	2008-09-10	2008	5	5	5788.59	3.76257	3.41171	24.8619	0	3.0607	4	9.75	9.84	9.31	74.7965	74.269	75.0759	2.84908	2.74486	2.61324	3.55622	3.69416	2.83696	16.4417	15.7875	15.05	52.6833	56.2317	69.1583	7.64561	6.83353	4.47592
466	low	1	2008-09-10	2008	5	5	5788.59	3.76257	3.41171	24.8619	0	3.0607	4	9.75	9.84	9.31	74.7965	74.269	75.0759	2.84908	2.74486	2.61324	3.55622	3.69416	2.83696	16.4417	15.7875	15.05	52.6833	56.2317	69.1583	7.64561	6.83353	4.47592
467	low	1	2008-09-10	2008	5	5	5788.59	3.76257	3.41171	24.8619	0	3.0607	4	9.75	9.84	9.31	74.7965	74.269	75.0759	2.84908	2.74486	2.61324	3.55622	3.69416	2.83696	16.4417	15.7875	15.05	52.6833	56.2317	69.1583	7.64561	6.83353	4.47592
468	low	1	2008-09-10	2008	5	5	5788.59	3.76257	3.41171	24.8619	0	3.0607	4	9.75	9.84	9.31	74.7965	74.269	75.0759	2.84908	2.74486	2.61324	3.55622	3.69416	2.83696	16.4417	15.7875	15.05	52.6833	56.2317	69.1583	7.64561	6.83353	4.47592
469	low	1	2008-09-10	2008	5	5	5788.59	3.76257	3.41171	24.8619	0	3.0607	4	9.75	9.84	9.31	74.7965	74.269	75.0759	2.84908	2.74486	2.61324	3.55622	3.69416	2.83696	16.4417	15.7875	15.05	52.6833	56.2317	69.1583	7.64561	6.83353	4.47592
470	low	1	2008-09-10	2008	5	5	5788.59	3.76257	3.41171	24.8619	0	3.0607	4	9.75	9.84	9.31	74.7965	74.269	75.0759	2.84908	2.74486	2.61324	3.55622	3.69416	2.83696	16.4417	15.7875	15.05	52.6833	56.2317	69.1583	7.64561	6.83353	4.47592
471	low	1	2008-09-10	2008	5	5	5788.59	3.76257	3.41171	24.8619	1	3.0607	4	9.75	9.84	9.31	74.7965	74.269	75.0759	2.84908	2.74486	2.61324	3.55622	3.69416	2.83696	16.4417	15.7875	15.05	52.6833	56.2317	69.1583	7.64561	6.83353	4.47592
472	low	1	2008-09-10	2008	5	5	5788.59	3.76257	3.41171	24.8619	0	3.0607	4	9.75	9.84	9.31	74.7965	74.269	75.0759	2.84908	2.74486	2.61324	3.55622	3.69416	2.83696	16.4417	15.7875	15.05	52.6833	56.2317	69.1583	7.64561	6.83353	4.47592
473	low	1	2008-09-10	2008	5	5	5788.59	3.76257	3.41171	24.8619	0	3.0607	4	9.75	9.84	9.31	74.7965	74.269	75.0759	2.84908	2.74486	2.61324	3.55622	3.69416	2.83696	16.4417	15.7875	15.05	52.6833	56.2317	69.1583	7.64561	6.83353	4.47592
474	low	1	2008-09-10	2008	5	5	5788.59	3.76257	3.41171	24.8619	1	3.0607	4	9.75	9.84	9.31	74.7965	74.269	75.0759	2.84908	2.74486	2.61324	3.55622	3.69416	2.83696	16.4417	15.7875	15.05	52.6833	56.2317	69.1583	7.64561	6.83353	4.47592
475	low	1	2008-09-10	2008	5	5	5788.59	3.76257	3.41171	24.8619	0	3.0607	4	9.75	9.84	9.31	74.7965	74.269	75.0759	2.84908	2.74486	2.61324	3.55622	3.69416	2.83696	16.4417	15.7875	15.05	52.6833	56.2317	69.1583	7.64561	6.83353	4.47592
476	low	1	2008-09-10	2008	5	5	5788.59	3.76257	3.41171	24.8619	0	3.0607	4	9.75	9.84	9.31	74.7965	74.269	75.0759	2.84908	2.74486	2.61324	3.55622	3.69416	2.83696	16.4417	15.7875	15.05	52.6833	56.2317	69.1583	7.64561	6.83353	4.47592
477	low	1	2008-09-10	2008	5	5	5788.59	3.76257	3.41171	24.8619	1	3.0607	4	9.75	9.84	9.31	74.7965	74.269	75.0759	2.84908	2.74486	2.61324	3.55622	3.69416	2.83696	16.4417	15.7875	15.05	52.6833	56.2317	69.1583	7.64561	6.83353	4.47592
478	low	1	2008-09-10	2008	5	5	5788.59	3.76257	3.41171	24.8619	0	3.0607	4	9.75	9.84	9.31	74.7965	74.269	75.0759	2.84908	2.74486	2.61324	3.55622	3.69416	2.83696	16.4417	15.7875	15.05	52.6833	56.2317	69.1583	7.64561	6.83353	4.47592
479	low	1	2008-09-10	2008	5	5	5788.59	3.76257	3.41171	24.8619	0	3.0607	4	9.75	9.84	9.31	74.7965	74.269	75.0759	2.84908	2.74486	2.61324	3.55622	3.69416	2.83696	16.4417	15.7875	15.05	52.6833	56.2317	69.1583	7.64561	6.83353	4.47592
480	low	1	2008-09-10	2008	5	5	5788.59	3.76257	3.41171	24.8619	0	3.0607	4	9.75	9.84	9.31	74.7965	74.269	75.0759	2.84908	2.74486	2.61324	3.55622	3.69416	2.83696	16.4417	15.7875	15.05	52.6833	56.2317	69.1583	7.64561	6.83353	4.47592
481	low	1	2008-09-10	2008	5	5	5788.59	3.76257	3.41171	24.8619	0	3.0607	4	9.75	9.84	9.31	74.7965	74.269	75.0759	2.84908	2.74486	2.61324	3.55622	3.69416	2.83696	16.4417	15.7875	15.05	52.6833	56.2317	69.1583	7.64561	6.83353	4.47592
482	low	1	2008-09-10	2008	5	5	5788.59	3.76257	3.41171	24.8619	0	3.0607	4	9.75	9.84	9.31	74.7965	74.269	75.0759	2.84908	2.74486	2.61324	3.55622	3.69416	2.83696	16.4417	15.7875	15.05	52.6833	56.2317	69.1583	7.64561	6.83353	4.47592
483	low	1	2008-09-10	2008	5	5	5788.59	3.76257	3.41171	24.8619	0	3.0607	4	9.75	9.84	9.31	74.7965	74.269	75.0759	2.84908	2.74486	2.61324	3.55622	3.69416	2.83696	16.4417	15.7875	15.05	52.6833	56.2317	69.1583	7.64561	6.83353	4.47592
484	low	1	2008-10-20	2008	5	5	5788.59	3.76257	3.41171	24.8619	0	3.04805	4	9.75	9.84	9.31	74.7965	74.269	75.0759	2.84908	2.74486	2.61324	3.55622	3.69416	2.83696	16.4417	15.7875	15.05	52.6833	56.2317	69.1583	7.64561	6.83353	4.47592
485	low	1	2008-10-20	2008	5	5	5788.59	3.76257	3.41171	24.8619	1	3.04805	4	9.75	9.84	9.31	74.7965	74.269	75.0759	2.84908	2.74486	2.61324	3.55622	3.69416	2.83696	16.4417	15.7875	15.05	52.6833	56.2317	69.1583	7.64561	6.83353	4.47592
486	low	1	2008-10-20	2008	5	5	5788.59	3.76257	3.41171	24.8619	0	3.04805	4	9.75	9.84	9.31	74.7965	74.269	75.0759	2.84908	2.74486	2.61324	3.55622	3.69416	2.83696	16.4417	15.7875	15.05	52.6833	56.2317	69.1583	7.64561	6.83353	4.47592
487	low	1	2008-10-20	2008	5	5	5788.59	3.76257	3.41171	24.8619	0	3.04805	4	9.75	9.84	9.31	74.7965	74.269	75.0759	2.84908	2.74486	2.61324	3.55622	3.69416	2.83696	16.4417	15.7875	15.05	52.6833	56.2317	69.1583	7.64561	6.83353	4.47592
488	low	1	2008-10-20	2008	5	5	5788.59	3.76257	3.41171	24.8619	0	3.04805	4	9.75	9.84	9.31	74.7965	74.269	75.0759	2.84908	2.74486	2.61324	3.55622	3.69416	2.83696	16.4417	15.7875	15.05	52.6833	56.2317	69.1583	7.64561	6.83353	4.47592
489	low	1	2008-10-20	2008	5	5	5788.59	3.76257	3.41171	24.8619	0	3.04805	4	9.75	9.84	9.31	74.7965	74.269	75.0759	2.84908	2.74486	2.61324	3.55622	3.69416	2.83696	16.4417	15.7875	15.05	52.6833	56.2317	69.1583	7.64561	6.83353	4.47592
490	low	1	2008-10-20	2008	5	5	5788.59	3.76257	3.41171	24.8619	1	3.04805	4	9.75	9.84	9.31	74.7965	74.269	75.0759	2.84908	2.74486	2.61324	3.55622	3.69416	2.83696	16.4417	15.7875	15.05	52.6833	56.2317	69.1583	7.64561	6.83353	4.47592
491	low	1	2008-10-20	2008	5	5	5788.59	3.76257	3.41171	24.8619	0	3.04805	4	9.75	9.84	9.31	74.7965	74.269	75.0759	2.84908	2.74486	2.61324	3.55622	3.69416	2.83696	16.4417	15.7875	15.05	52.6833	56.2317	69.1583	7.64561	6.83353	4.47592
492	low	1	2008-10-20	2008	5	5	5788.59	3.76257	3.41171	24.8619	0	3.04805	4	9.75	9.84	9.31	74.7965	74.269	75.0759	2.84908	2.74486	2.61324	3.55622	3.69416	2.83696	16.4417	15.7875	15.05	52.6833	56.2317	69.1583	7.64561	6.83353	4.47592
493	low	1	2008-10-20	2008	5	5	5788.59	3.76257	3.41171	24.8619	0	3.04805	4	9.75	9.84	9.31	74.7965	74.269	75.0759	2.84908	2.74486	2.61324	3.55622	3.69416	2.83696	16.4417	15.7875	15.05	52.6833	56.2317	69.1583	7.64561	6.83353	4.47592
494	low	1	2008-10-20	2008	5	5	5788.59	3.76257	3.41171	24.8619	0	3.04805	4	9.75	9.84	9.31	74.7965	74.269	75.0759	2.84908	2.74486	2.61324	3.55622	3.69416	2.83696	16.4417	15.7875	15.05	52.6833	56.2317	69.1583	7.64561	6.83353	4.47592
495	low	1	2008-10-20	2008	5	5	5788.59	3.76257	3.41171	24.8619	0	3.04805	4	9.75	9.84	9.31	74.7965	74.269	75.0759	2.84908	2.74486	2.61324	3.55622	3.69416	2.83696	16.4417	15.7875	15.05	52.6833	56.2317	69.1583	7.64561	6.83353	4.47592
496	low	1	2008-10-20	2008	5	5	5788.59	3.76257	3.41171	24.8619	1	3.04805	4	9.75	9.84	9.31	74.7965	74.269	75.0759	2.84908	2.74486	2.61324	3.55622	3.69416	2.83696	16.4417	15.7875	15.05	52.6833	56.2317	69.1583	7.64561	6.83353	4.47592
497	low	1	2008-10-20	2008	5	5	5788.59	3.76257	3.41171	24.8619	0	3.04805	4	9.75	9.84	9.31	74.7965	74.269	75.0759	2.84908	2.74486	2.61324	3.55622	3.69416	2.83696	16.4417	15.7875	15.05	52.6833	56.2317	69.1583	7.64561	6.83353	4.47592
498	low	1	2008-10-20	2008	5	5	5788.59	3.76257	3.41171	24.8619	0	3.04805	4	9.75	9.84	9.31	74.7965	74.269	75.0759	2.84908	2.74486	2.61324	3.55622	3.69416	2.83696	16.4417	15.7875	15.05	52.6833	56.2317	69.1583	7.64561	6.83353	4.47592
499	low	1	2008-10-20	2008	5	5	5788.59	3.76257	3.41171	24.8619	1	3.04805	4	9.75	9.84	9.31	74.7965	74.269	75.0759	2.84908	2.74486	2.61324	3.55622	3.69416	2.83696	16.4417	15.7875	15.05	52.6833	56.2317	69.1583	7.64561	6.83353	4.47592
500	low	1	2008-10-20	2008	5	5	5788.59	3.76257	3.41171	24.8619	0	3.04805	4	9.75	9.84	9.31	74.7965	74.269	75.0759	2.84908	2.74486	2.61324	3.55622	3.69416	2.83696	16.4417	15.7875	15.05	52.6833	56.2317	69.1583	7.64561	6.83353	4.47592
501	low	1	2008-10-20	2008	5	5	5788.59	3.76257	3.41171	24.8619	1	3.04805	4	9.75	9.84	9.31	74.7965	74.269	75.0759	2.84908	2.74486	2.61324	3.55622	3.69416	2.83696	16.4417	15.7875	15.05	52.6833	56.2317	69.1583	7.64561	6.83353	4.47592
502	low	1	2008-10-20	2008	5	5	5788.59	3.76257	3.41171	24.8619	0	3.04805	4	9.75	9.84	9.31	74.7965	74.269	75.0759	2.84908	2.74486	2.61324	3.55622	3.69416	2.83696	16.4417	15.7875	15.05	52.6833	56.2317	69.1583	7.64561	6.83353	4.47592
503	low	1	2008-10-20	2008	5	5	5788.59	3.76257	3.41171	24.8619	0	3.04805	4	9.75	9.84	9.31	74.7965	74.269	75.0759	2.84908	2.74486	2.61324	3.55622	3.69416	2.83696	16.4417	15.7875	15.05	52.6833	56.2317	69.1583	7.64561	6.83353	4.47592
504	low	1	2009-03-31	2009	6	6	2476.03	3.39376	3.76257	17.2414	0	2.99211	1	9.84	9.31	9.83	74.269	75.0759	73.746	2.74486	2.61324	3.00677	3.69416	2.83696	2.36716	15.7875	15.05	15.7517	56.2317	69.1583	66.3442	6.83353	4.47592	5.63744
505	low	1	2009-03-31	2009	6	6	2476.03	3.39376	3.76257	17.2414	0	2.99211	1	9.84	9.31	9.83	74.269	75.0759	73.746	2.74486	2.61324	3.00677	3.69416	2.83696	2.36716	15.7875	15.05	15.7517	56.2317	69.1583	66.3442	6.83353	4.47592	5.63744
506	low	1	2009-03-31	2009	6	6	2476.03	3.39376	3.76257	17.2414	0	2.99211	1	9.84	9.31	9.83	74.269	75.0759	73.746	2.74486	2.61324	3.00677	3.69416	2.83696	2.36716	15.7875	15.05	15.7517	56.2317	69.1583	66.3442	6.83353	4.47592	5.63744
507	low	1	2009-03-31	2009	6	6	2476.03	3.39376	3.76257	17.2414	1	2.99211	1	9.84	9.31	9.83	74.269	75.0759	73.746	2.74486	2.61324	3.00677	3.69416	2.83696	2.36716	15.7875	15.05	15.7517	56.2317	69.1583	66.3442	6.83353	4.47592	5.63744
508	low	1	2009-03-31	2009	6	6	2476.03	3.39376	3.76257	17.2414	0	2.99211	1	9.84	9.31	9.83	74.269	75.0759	73.746	2.74486	2.61324	3.00677	3.69416	2.83696	2.36716	15.7875	15.05	15.7517	56.2317	69.1583	66.3442	6.83353	4.47592	5.63744
509	low	1	2009-03-31	2009	6	6	2476.03	3.39376	3.76257	17.2414	0	2.99211	1	9.84	9.31	9.83	74.269	75.0759	73.746	2.74486	2.61324	3.00677	3.69416	2.83696	2.36716	15.7875	15.05	15.7517	56.2317	69.1583	66.3442	6.83353	4.47592	5.63744
510	low	1	2009-03-31	2009	6	6	2476.03	3.39376	3.76257	17.2414	0	2.99211	1	9.84	9.31	9.83	74.269	75.0759	73.746	2.74486	2.61324	3.00677	3.69416	2.83696	2.36716	15.7875	15.05	15.7517	56.2317	69.1583	66.3442	6.83353	4.47592	5.63744
511	low	1	2009-03-31	2009	6	6	2476.03	3.39376	3.76257	17.2414	0	2.99211	1	9.84	9.31	9.83	74.269	75.0759	73.746	2.74486	2.61324	3.00677	3.69416	2.83696	2.36716	15.7875	15.05	15.7517	56.2317	69.1583	66.3442	6.83353	4.47592	5.63744
512	low	1	2009-03-31	2009	6	6	2476.03	3.39376	3.76257	17.2414	0	2.99211	1	9.84	9.31	9.83	74.269	75.0759	73.746	2.74486	2.61324	3.00677	3.69416	2.83696	2.36716	15.7875	15.05	15.7517	56.2317	69.1583	66.3442	6.83353	4.47592	5.63744
513	low	1	2009-03-31	2009	6	6	2476.03	3.39376	3.76257	17.2414	0	2.99211	1	9.84	9.31	9.83	74.269	75.0759	73.746	2.74486	2.61324	3.00677	3.69416	2.83696	2.36716	15.7875	15.05	15.7517	56.2317	69.1583	66.3442	6.83353	4.47592	5.63744
514	low	1	2009-03-31	2009	6	6	2476.03	3.39376	3.76257	17.2414	0	2.99211	1	9.84	9.31	9.83	74.269	75.0759	73.746	2.74486	2.61324	3.00677	3.69416	2.83696	2.36716	15.7875	15.05	15.7517	56.2317	69.1583	66.3442	6.83353	4.47592	5.63744
515	low	1	2009-03-31	2009	6	6	2476.03	3.39376	3.76257	17.2414	1	2.99211	1	9.84	9.31	9.83	74.269	75.0759	73.746	2.74486	2.61324	3.00677	3.69416	2.83696	2.36716	15.7875	15.05	15.7517	56.2317	69.1583	66.3442	6.83353	4.47592	5.63744
516	low	1	2009-03-31	2009	6	6	2476.03	3.39376	3.76257	17.2414	0	2.99211	1	9.84	9.31	9.83	74.269	75.0759	73.746	2.74486	2.61324	3.00677	3.69416	2.83696	2.36716	15.7875	15.05	15.7517	56.2317	69.1583	66.3442	6.83353	4.47592	5.63744
517	low	1	2009-03-31	2009	6	6	2476.03	3.39376	3.76257	17.2414	0	2.99211	1	9.84	9.31	9.83	74.269	75.0759	73.746	2.74486	2.61324	3.00677	3.69416	2.83696	2.36716	15.7875	15.05	15.7517	56.2317	69.1583	66.3442	6.83353	4.47592	5.63744
518	low	1	2009-03-31	2009	6	6	2476.03	3.39376	3.76257	17.2414	0	2.99211	1	9.84	9.31	9.83	74.269	75.0759	73.746	2.74486	2.61324	3.00677	3.69416	2.83696	2.36716	15.7875	15.05	15.7517	56.2317	69.1583	66.3442	6.83353	4.47592	5.63744
519	low	1	2009-03-31	2009	6	6	2476.03	3.39376	3.76257	17.2414	0	2.99211	1	9.84	9.31	9.83	74.269	75.0759	73.746	2.74486	2.61324	3.00677	3.69416	2.83696	2.36716	15.7875	15.05	15.7517	56.2317	69.1583	66.3442	6.83353	4.47592	5.63744
520	low	1	2009-03-31	2009	6	6	2476.03	3.39376	3.76257	17.2414	0	2.99211	1	9.84	9.31	9.83	74.269	75.0759	73.746	2.74486	2.61324	3.00677	3.69416	2.83696	2.36716	15.7875	15.05	15.7517	56.2317	69.1583	66.3442	6.83353	4.47592	5.63744
521	low	1	2009-03-31	2009	6	6	2476.03	3.39376	3.76257	17.2414	0	2.99211	1	9.84	9.31	9.83	74.269	75.0759	73.746	2.74486	2.61324	3.00677	3.69416	2.83696	2.36716	15.7875	15.05	15.7517	56.2317	69.1583	66.3442	6.83353	4.47592	5.63744
522	low	1	2009-03-31	2009	6	6	2476.03	3.39376	3.76257	17.2414	0	2.99211	1	9.84	9.31	9.83	74.269	75.0759	73.746	2.74486	2.61324	3.00677	3.69416	2.83696	2.36716	15.7875	15.05	15.7517	56.2317	69.1583	66.3442	6.83353	4.47592	5.63744
523	low	1	2009-03-31	2009	6	6	2476.03	3.39376	3.76257	17.2414	0	2.99211	1	9.84	9.31	9.83	74.269	75.0759	73.746	2.74486	2.61324	3.00677	3.69416	2.83696	2.36716	15.7875	15.05	15.7517	56.2317	69.1583	66.3442	6.83353	4.47592	5.63744
524	low	1	2009-04-24	2009	6	6	2476.03	3.39376	3.76257	17.2414	0	3.23045	1	9.84	9.31	9.83	74.269	75.0759	73.746	2.74486	2.61324	3.00677	3.69416	2.83696	2.36716	15.7875	15.05	15.7517	56.2317	69.1583	66.3442	6.83353	4.47592	5.63744
525	low	1	2009-04-24	2009	6	6	2476.03	3.39376	3.76257	17.2414	0	3.23045	1	9.84	9.31	9.83	74.269	75.0759	73.746	2.74486	2.61324	3.00677	3.69416	2.83696	2.36716	15.7875	15.05	15.7517	56.2317	69.1583	66.3442	6.83353	4.47592	5.63744
526	low	1	2009-04-24	2009	6	6	2476.03	3.39376	3.76257	17.2414	0	3.23045	1	9.84	9.31	9.83	74.269	75.0759	73.746	2.74486	2.61324	3.00677	3.69416	2.83696	2.36716	15.7875	15.05	15.7517	56.2317	69.1583	66.3442	6.83353	4.47592	5.63744
527	low	1	2009-04-24	2009	6	6	2476.03	3.39376	3.76257	17.2414	0	3.23045	1	9.84	9.31	9.83	74.269	75.0759	73.746	2.74486	2.61324	3.00677	3.69416	2.83696	2.36716	15.7875	15.05	15.7517	56.2317	69.1583	66.3442	6.83353	4.47592	5.63744
528	low	1	2009-04-24	2009	6	6	2476.03	3.39376	3.76257	17.2414	1	3.23045	1	9.84	9.31	9.83	74.269	75.0759	73.746	2.74486	2.61324	3.00677	3.69416	2.83696	2.36716	15.7875	15.05	15.7517	56.2317	69.1583	66.3442	6.83353	4.47592	5.63744
529	low	1	2009-04-24	2009	6	6	2476.03	3.39376	3.76257	17.2414	0	3.23045	1	9.84	9.31	9.83	74.269	75.0759	73.746	2.74486	2.61324	3.00677	3.69416	2.83696	2.36716	15.7875	15.05	15.7517	56.2317	69.1583	66.3442	6.83353	4.47592	5.63744
530	low	1	2009-04-24	2009	6	6	2476.03	3.39376	3.76257	17.2414	0	3.23045	1	9.84	9.31	9.83	74.269	75.0759	73.746	2.74486	2.61324	3.00677	3.69416	2.83696	2.36716	15.7875	15.05	15.7517	56.2317	69.1583	66.3442	6.83353	4.47592	5.63744
531	low	1	2009-04-24	2009	6	6	2476.03	3.39376	3.76257	17.2414	0	3.23045	1	9.84	9.31	9.83	74.269	75.0759	73.746	2.74486	2.61324	3.00677	3.69416	2.83696	2.36716	15.7875	15.05	15.7517	56.2317	69.1583	66.3442	6.83353	4.47592	5.63744
532	low	1	2009-04-24	2009	6	6	2476.03	3.39376	3.76257	17.2414	1	3.23045	1	9.84	9.31	9.83	74.269	75.0759	73.746	2.74486	2.61324	3.00677	3.69416	2.83696	2.36716	15.7875	15.05	15.7517	56.2317	69.1583	66.3442	6.83353	4.47592	5.63744
533	low	1	2009-04-24	2009	6	6	2476.03	3.39376	3.76257	17.2414	1	3.23045	1	9.84	9.31	9.83	74.269	75.0759	73.746	2.74486	2.61324	3.00677	3.69416	2.83696	2.36716	15.7875	15.05	15.7517	56.2317	69.1583	66.3442	6.83353	4.47592	5.63744
534	low	1	2009-04-24	2009	6	6	2476.03	3.39376	3.76257	17.2414	0	3.23045	1	9.84	9.31	9.83	74.269	75.0759	73.746	2.74486	2.61324	3.00677	3.69416	2.83696	2.36716	15.7875	15.05	15.7517	56.2317	69.1583	66.3442	6.83353	4.47592	5.63744
535	low	1	2009-04-24	2009	6	6	2476.03	3.39376	3.76257	17.2414	1	3.23045	1	9.84	9.31	9.83	74.269	75.0759	73.746	2.74486	2.61324	3.00677	3.69416	2.83696	2.36716	15.7875	15.05	15.7517	56.2317	69.1583	66.3442	6.83353	4.47592	5.63744
536	low	1	2009-04-24	2009	6	6	2476.03	3.39376	3.76257	17.2414	0	3.23045	1	9.84	9.31	9.83	74.269	75.0759	73.746	2.74486	2.61324	3.00677	3.69416	2.83696	2.36716	15.7875	15.05	15.7517	56.2317	69.1583	66.3442	6.83353	4.47592	5.63744
537	low	1	2009-04-24	2009	6	6	2476.03	3.39376	3.76257	17.2414	0	3.23045	1	9.84	9.31	9.83	74.269	75.0759	73.746	2.74486	2.61324	3.00677	3.69416	2.83696	2.36716	15.7875	15.05	15.7517	56.2317	69.1583	66.3442	6.83353	4.47592	5.63744
538	low	1	2009-04-24	2009	6	6	2476.03	3.39376	3.76257	17.2414	0	3.23045	1	9.84	9.31	9.83	74.269	75.0759	73.746	2.74486	2.61324	3.00677	3.69416	2.83696	2.36716	15.7875	15.05	15.7517	56.2317	69.1583	66.3442	6.83353	4.47592	5.63744
539	low	1	2009-04-24	2009	6	6	2476.03	3.39376	3.76257	17.2414	0	3.23045	1	9.84	9.31	9.83	74.269	75.0759	73.746	2.74486	2.61324	3.00677	3.69416	2.83696	2.36716	15.7875	15.05	15.7517	56.2317	69.1583	66.3442	6.83353	4.47592	5.63744
540	low	1	2009-04-24	2009	6	6	2476.03	3.39376	3.76257	17.2414	0	3.23045	1	9.84	9.31	9.83	74.269	75.0759	73.746	2.74486	2.61324	3.00677	3.69416	2.83696	2.36716	15.7875	15.05	15.7517	56.2317	69.1583	66.3442	6.83353	4.47592	5.63744
541	low	1	2009-04-24	2009	6	6	2476.03	3.39376	3.76257	17.2414	1	3.23045	1	9.84	9.31	9.83	74.269	75.0759	73.746	2.74486	2.61324	3.00677	3.69416	2.83696	2.36716	15.7875	15.05	15.7517	56.2317	69.1583	66.3442	6.83353	4.47592	5.63744
542	low	1	2009-04-24	2009	6	6	2476.03	3.39376	3.76257	17.2414	0	3.23045	1	9.84	9.31	9.83	74.269	75.0759	73.746	2.74486	2.61324	3.00677	3.69416	2.83696	2.36716	15.7875	15.05	15.7517	56.2317	69.1583	66.3442	6.83353	4.47592	5.63744
543	low	1	2009-04-24	2009	6	6	2476.03	3.39376	3.76257	17.2414	0	3.23045	1	9.84	9.31	9.83	74.269	75.0759	73.746	2.74486	2.61324	3.00677	3.69416	2.83696	2.36716	15.7875	15.05	15.7517	56.2317	69.1583	66.3442	6.83353	4.47592	5.63744
544	low	1	2009-05-25	2009	6	6	2476.03	3.39376	3.76257	17.2414	0	3.22063	1	9.84	9.31	9.83	74.269	75.0759	73.746	2.74486	2.61324	3.00677	3.69416	2.83696	2.36716	15.7875	15.05	15.7517	56.2317	69.1583	66.3442	6.83353	4.47592	5.63744
545	low	1	2009-05-25	2009	6	6	2476.03	3.39376	3.76257	17.2414	0	3.22063	1	9.84	9.31	9.83	74.269	75.0759	73.746	2.74486	2.61324	3.00677	3.69416	2.83696	2.36716	15.7875	15.05	15.7517	56.2317	69.1583	66.3442	6.83353	4.47592	5.63744
546	low	1	2009-05-25	2009	6	6	2476.03	3.39376	3.76257	17.2414	0	3.22063	1	9.84	9.31	9.83	74.269	75.0759	73.746	2.74486	2.61324	3.00677	3.69416	2.83696	2.36716	15.7875	15.05	15.7517	56.2317	69.1583	66.3442	6.83353	4.47592	5.63744
547	low	1	2009-05-25	2009	6	6	2476.03	3.39376	3.76257	17.2414	0	3.22063	1	9.84	9.31	9.83	74.269	75.0759	73.746	2.74486	2.61324	3.00677	3.69416	2.83696	2.36716	15.7875	15.05	15.7517	56.2317	69.1583	66.3442	6.83353	4.47592	5.63744
548	low	1	2009-05-25	2009	6	6	2476.03	3.39376	3.76257	17.2414	0	3.22063	1	9.84	9.31	9.83	74.269	75.0759	73.746	2.74486	2.61324	3.00677	3.69416	2.83696	2.36716	15.7875	15.05	15.7517	56.2317	69.1583	66.3442	6.83353	4.47592	5.63744
549	low	1	2009-05-25	2009	6	6	2476.03	3.39376	3.76257	17.2414	0	3.22063	1	9.84	9.31	9.83	74.269	75.0759	73.746	2.74486	2.61324	3.00677	3.69416	2.83696	2.36716	15.7875	15.05	15.7517	56.2317	69.1583	66.3442	6.83353	4.47592	5.63744
550	low	1	2009-05-25	2009	6	6	2476.03	3.39376	3.76257	17.2414	0	3.22063	1	9.84	9.31	9.83	74.269	75.0759	73.746	2.74486	2.61324	3.00677	3.69416	2.83696	2.36716	15.7875	15.05	15.7517	56.2317	69.1583	66.3442	6.83353	4.47592	5.63744
551	low	1	2009-05-25	2009	6	6	2476.03	3.39376	3.76257	17.2414	0	3.22063	1	9.84	9.31	9.83	74.269	75.0759	73.746	2.74486	2.61324	3.00677	3.69416	2.83696	2.36716	15.7875	15.05	15.7517	56.2317	69.1583	66.3442	6.83353	4.47592	5.63744
552	low	1	2009-05-25	2009	6	6	2476.03	3.39376	3.76257	17.2414	0	3.22063	1	9.84	9.31	9.83	74.269	75.0759	73.746	2.74486	2.61324	3.00677	3.69416	2.83696	2.36716	15.7875	15.05	15.7517	56.2317	69.1583	66.3442	6.83353	4.47592	5.63744
553	low	1	2009-05-25	2009	6	6	2476.03	3.39376	3.76257	17.2414	1	3.22063	1	9.84	9.31	9.83	74.269	75.0759	73.746	2.74486	2.61324	3.00677	3.69416	2.83696	2.36716	15.7875	15.05	15.7517	56.2317	69.1583	66.3442	6.83353	4.47592	5.63744
554	low	1	2009-05-25	2009	6	6	2476.03	3.39376	3.76257	17.2414	0	3.22063	1	9.84	9.31	9.83	74.269	75.0759	73.746	2.74486	2.61324	3.00677	3.69416	2.83696	2.36716	15.7875	15.05	15.7517	56.2317	69.1583	66.3442	6.83353	4.47592	5.63744
555	low	1	2009-05-25	2009	6	6	2476.03	3.39376	3.76257	17.2414	1	3.22063	1	9.84	9.31	9.83	74.269	75.0759	73.746	2.74486	2.61324	3.00677	3.69416	2.83696	2.36716	15.7875	15.05	15.7517	56.2317	69.1583	66.3442	6.83353	4.47592	5.63744
556	low	1	2009-05-25	2009	6	6	2476.03	3.39376	3.76257	17.2414	0	3.22063	1	9.84	9.31	9.83	74.269	75.0759	73.746	2.74486	2.61324	3.00677	3.69416	2.83696	2.36716	15.7875	15.05	15.7517	56.2317	69.1583	66.3442	6.83353	4.47592	5.63744
557	low	1	2009-05-25	2009	6	6	2476.03	3.39376	3.76257	17.2414	0	3.22063	1	9.84	9.31	9.83	74.269	75.0759	73.746	2.74486	2.61324	3.00677	3.69416	2.83696	2.36716	15.7875	15.05	15.7517	56.2317	69.1583	66.3442	6.83353	4.47592	5.63744
558	low	1	2009-05-25	2009	6	6	2476.03	3.39376	3.76257	17.2414	0	3.22063	1	9.84	9.31	9.83	74.269	75.0759	73.746	2.74486	2.61324	3.00677	3.69416	2.83696	2.36716	15.7875	15.05	15.7517	56.2317	69.1583	66.3442	6.83353	4.47592	5.63744
559	low	1	2009-05-25	2009	6	6	2476.03	3.39376	3.76257	17.2414	1	3.22063	1	9.84	9.31	9.83	74.269	75.0759	73.746	2.74486	2.61324	3.00677	3.69416	2.83696	2.36716	15.7875	15.05	15.7517	56.2317	69.1583	66.3442	6.83353	4.47592	5.63744
560	low	1	2009-05-25	2009	6	6	2476.03	3.39376	3.76257	17.2414	1	3.22063	1	9.84	9.31	9.83	74.269	75.0759	73.746	2.74486	2.61324	3.00677	3.69416	2.83696	2.36716	15.7875	15.05	15.7517	56.2317	69.1583	66.3442	6.83353	4.47592	5.63744
561	low	1	2009-05-25	2009	6	6	2476.03	3.39376	3.76257	17.2414	0	3.22063	1	9.84	9.31	9.83	74.269	75.0759	73.746	2.74486	2.61324	3.00677	3.69416	2.83696	2.36716	15.7875	15.05	15.7517	56.2317	69.1583	66.3442	6.83353	4.47592	5.63744
562	low	1	2009-05-25	2009	6	6	2476.03	3.39376	3.76257	17.2414	1	3.22063	1	9.84	9.31	9.83	74.269	75.0759	73.746	2.74486	2.61324	3.00677	3.69416	2.83696	2.36716	15.7875	15.05	15.7517	56.2317	69.1583	66.3442	6.83353	4.47592	5.63744
563	low	1	2009-05-25	2009	6	6	2476.03	3.39376	3.76257	17.2414	0	3.22063	1	9.84	9.31	9.83	74.269	75.0759	73.746	2.74486	2.61324	3.00677	3.69416	2.83696	2.36716	15.7875	15.05	15.7517	56.2317	69.1583	66.3442	6.83353	4.47592	5.63744
564	low	1	2009-06-18	2009	6	6	2476.03	3.39376	3.76257	17.2414	0	3.22376	1	9.84	9.31	9.83	74.269	75.0759	73.746	2.74486	2.61324	3.00677	3.69416	2.83696	2.36716	15.7875	15.05	15.7517	56.2317	69.1583	66.3442	6.83353	4.47592	5.63744
565	low	1	2009-06-18	2009	6	6	2476.03	3.39376	3.76257	17.2414	0	3.22376	1	9.84	9.31	9.83	74.269	75.0759	73.746	2.74486	2.61324	3.00677	3.69416	2.83696	2.36716	15.7875	15.05	15.7517	56.2317	69.1583	66.3442	6.83353	4.47592	5.63744
566	low	1	2009-06-18	2009	6	6	2476.03	3.39376	3.76257	17.2414	0	3.22376	1	9.84	9.31	9.83	74.269	75.0759	73.746	2.74486	2.61324	3.00677	3.69416	2.83696	2.36716	15.7875	15.05	15.7517	56.2317	69.1583	66.3442	6.83353	4.47592	5.63744
567	low	1	2009-06-18	2009	6	6	2476.03	3.39376	3.76257	17.2414	0	3.22376	1	9.84	9.31	9.83	74.269	75.0759	73.746	2.74486	2.61324	3.00677	3.69416	2.83696	2.36716	15.7875	15.05	15.7517	56.2317	69.1583	66.3442	6.83353	4.47592	5.63744
568	low	1	2009-06-18	2009	6	6	2476.03	3.39376	3.76257	17.2414	1	3.22376	1	9.84	9.31	9.83	74.269	75.0759	73.746	2.74486	2.61324	3.00677	3.69416	2.83696	2.36716	15.7875	15.05	15.7517	56.2317	69.1583	66.3442	6.83353	4.47592	5.63744
569	low	1	2009-06-18	2009	6	6	2476.03	3.39376	3.76257	17.2414	0	3.22376	1	9.84	9.31	9.83	74.269	75.0759	73.746	2.74486	2.61324	3.00677	3.69416	2.83696	2.36716	15.7875	15.05	15.7517	56.2317	69.1583	66.3442	6.83353	4.47592	5.63744
570	low	1	2009-06-18	2009	6	6	2476.03	3.39376	3.76257	17.2414	0	3.22376	1	9.84	9.31	9.83	74.269	75.0759	73.746	2.74486	2.61324	3.00677	3.69416	2.83696	2.36716	15.7875	15.05	15.7517	56.2317	69.1583	66.3442	6.83353	4.47592	5.63744
571	low	1	2009-06-18	2009	6	6	2476.03	3.39376	3.76257	17.2414	0	3.22376	1	9.84	9.31	9.83	74.269	75.0759	73.746	2.74486	2.61324	3.00677	3.69416	2.83696	2.36716	15.7875	15.05	15.7517	56.2317	69.1583	66.3442	6.83353	4.47592	5.63744
572	low	1	2009-06-18	2009	6	6	2476.03	3.39376	3.76257	17.2414	0	3.22376	1	9.84	9.31	9.83	74.269	75.0759	73.746	2.74486	2.61324	3.00677	3.69416	2.83696	2.36716	15.7875	15.05	15.7517	56.2317	69.1583	66.3442	6.83353	4.47592	5.63744
573	low	1	2009-06-18	2009	6	6	2476.03	3.39376	3.76257	17.2414	0	3.22376	1	9.84	9.31	9.83	74.269	75.0759	73.746	2.74486	2.61324	3.00677	3.69416	2.83696	2.36716	15.7875	15.05	15.7517	56.2317	69.1583	66.3442	6.83353	4.47592	5.63744
574	low	1	2009-06-18	2009	6	6	2476.03	3.39376	3.76257	17.2414	0	3.22376	1	9.84	9.31	9.83	74.269	75.0759	73.746	2.74486	2.61324	3.00677	3.69416	2.83696	2.36716	15.7875	15.05	15.7517	56.2317	69.1583	66.3442	6.83353	4.47592	5.63744
575	low	1	2009-06-18	2009	6	6	2476.03	3.39376	3.76257	17.2414	0	3.22376	1	9.84	9.31	9.83	74.269	75.0759	73.746	2.74486	2.61324	3.00677	3.69416	2.83696	2.36716	15.7875	15.05	15.7517	56.2317	69.1583	66.3442	6.83353	4.47592	5.63744
576	low	1	2009-06-18	2009	6	6	2476.03	3.39376	3.76257	17.2414	1	3.22376	1	9.84	9.31	9.83	74.269	75.0759	73.746	2.74486	2.61324	3.00677	3.69416	2.83696	2.36716	15.7875	15.05	15.7517	56.2317	69.1583	66.3442	6.83353	4.47592	5.63744
577	low	1	2009-06-18	2009	6	6	2476.03	3.39376	3.76257	17.2414	0	3.22376	1	9.84	9.31	9.83	74.269	75.0759	73.746	2.74486	2.61324	3.00677	3.69416	2.83696	2.36716	15.7875	15.05	15.7517	56.2317	69.1583	66.3442	6.83353	4.47592	5.63744
578	low	1	2009-06-18	2009	6	6	2476.03	3.39376	3.76257	17.2414	0	3.22376	1	9.84	9.31	9.83	74.269	75.0759	73.746	2.74486	2.61324	3.00677	3.69416	2.83696	2.36716	15.7875	15.05	15.7517	56.2317	69.1583	66.3442	6.83353	4.47592	5.63744
579	low	1	2009-06-18	2009	6	6	2476.03	3.39376	3.76257	17.2414	0	3.22376	1	9.84	9.31	9.83	74.269	75.0759	73.746	2.74486	2.61324	3.00677	3.69416	2.83696	2.36716	15.7875	15.05	15.7517	56.2317	69.1583	66.3442	6.83353	4.47592	5.63744
580	low	1	2009-06-18	2009	6	6	2476.03	3.39376	3.76257	17.2414	1	3.22376	1	9.84	9.31	9.83	74.269	75.0759	73.746	2.74486	2.61324	3.00677	3.69416	2.83696	2.36716	15.7875	15.05	15.7517	56.2317	69.1583	66.3442	6.83353	4.47592	5.63744
581	low	1	2009-06-18	2009	6	6	2476.03	3.39376	3.76257	17.2414	0	3.22376	1	9.84	9.31	9.83	74.269	75.0759	73.746	2.74486	2.61324	3.00677	3.69416	2.83696	2.36716	15.7875	15.05	15.7517	56.2317	69.1583	66.3442	6.83353	4.47592	5.63744
582	low	1	2009-06-18	2009	6	6	2476.03	3.39376	3.76257	17.2414	0	3.22376	1	9.84	9.31	9.83	74.269	75.0759	73.746	2.74486	2.61324	3.00677	3.69416	2.83696	2.36716	15.7875	15.05	15.7517	56.2317	69.1583	66.3442	6.83353	4.47592	5.63744
583	low	1	2009-06-18	2009	6	6	2476.03	3.39376	3.76257	17.2414	0	3.22376	1	9.84	9.31	9.83	74.269	75.0759	73.746	2.74486	2.61324	3.00677	3.69416	2.83696	2.36716	15.7875	15.05	15.7517	56.2317	69.1583	66.3442	6.83353	4.47592	5.63744
584	low	1	2009-07-29	2009	6	6	2476.03	3.39376	3.76257	17.2414	0	2.93952	1	9.84	9.31	9.83	74.269	75.0759	73.746	2.74486	2.61324	3.00677	3.69416	2.83696	2.36716	15.7875	15.05	15.7517	56.2317	69.1583	66.3442	6.83353	4.47592	5.63744
585	low	1	2009-07-29	2009	6	6	2476.03	3.39376	3.76257	17.2414	0	2.93952	1	9.84	9.31	9.83	74.269	75.0759	73.746	2.74486	2.61324	3.00677	3.69416	2.83696	2.36716	15.7875	15.05	15.7517	56.2317	69.1583	66.3442	6.83353	4.47592	5.63744
586	low	1	2009-07-29	2009	6	6	2476.03	3.39376	3.76257	17.2414	0	2.93952	1	9.84	9.31	9.83	74.269	75.0759	73.746	2.74486	2.61324	3.00677	3.69416	2.83696	2.36716	15.7875	15.05	15.7517	56.2317	69.1583	66.3442	6.83353	4.47592	5.63744
587	low	1	2009-07-29	2009	6	6	2476.03	3.39376	3.76257	17.2414	0	2.93952	1	9.84	9.31	9.83	74.269	75.0759	73.746	2.74486	2.61324	3.00677	3.69416	2.83696	2.36716	15.7875	15.05	15.7517	56.2317	69.1583	66.3442	6.83353	4.47592	5.63744
588	low	1	2009-07-29	2009	6	6	2476.03	3.39376	3.76257	17.2414	0	2.93952	1	9.84	9.31	9.83	74.269	75.0759	73.746	2.74486	2.61324	3.00677	3.69416	2.83696	2.36716	15.7875	15.05	15.7517	56.2317	69.1583	66.3442	6.83353	4.47592	5.63744
589	low	1	2009-07-29	2009	6	6	2476.03	3.39376	3.76257	17.2414	0	2.93952	1	9.84	9.31	9.83	74.269	75.0759	73.746	2.74486	2.61324	3.00677	3.69416	2.83696	2.36716	15.7875	15.05	15.7517	56.2317	69.1583	66.3442	6.83353	4.47592	5.63744
590	low	1	2009-07-29	2009	6	6	2476.03	3.39376	3.76257	17.2414	0	2.93952	1	9.84	9.31	9.83	74.269	75.0759	73.746	2.74486	2.61324	3.00677	3.69416	2.83696	2.36716	15.7875	15.05	15.7517	56.2317	69.1583	66.3442	6.83353	4.47592	5.63744
591	low	1	2009-07-29	2009	6	6	2476.03	3.39376	3.76257	17.2414	0	2.93952	1	9.84	9.31	9.83	74.269	75.0759	73.746	2.74486	2.61324	3.00677	3.69416	2.83696	2.36716	15.7875	15.05	15.7517	56.2317	69.1583	66.3442	6.83353	4.47592	5.63744
592	low	1	2009-07-29	2009	6	6	2476.03	3.39376	3.76257	17.2414	0	2.93952	1	9.84	9.31	9.83	74.269	75.0759	73.746	2.74486	2.61324	3.00677	3.69416	2.83696	2.36716	15.7875	15.05	15.7517	56.2317	69.1583	66.3442	6.83353	4.47592	5.63744
593	low	1	2009-07-29	2009	6	6	2476.03	3.39376	3.76257	17.2414	1	2.93952	1	9.84	9.31	9.83	74.269	75.0759	73.746	2.74486	2.61324	3.00677	3.69416	2.83696	2.36716	15.7875	15.05	15.7517	56.2317	69.1583	66.3442	6.83353	4.47592	5.63744
594	low	1	2009-07-29	2009	6	6	2476.03	3.39376	3.76257	17.2414	0	2.93952	1	9.84	9.31	9.83	74.269	75.0759	73.746	2.74486	2.61324	3.00677	3.69416	2.83696	2.36716	15.7875	15.05	15.7517	56.2317	69.1583	66.3442	6.83353	4.47592	5.63744
595	low	1	2009-07-29	2009	6	6	2476.03	3.39376	3.76257	17.2414	0	2.93952	1	9.84	9.31	9.83	74.269	75.0759	73.746	2.74486	2.61324	3.00677	3.69416	2.83696	2.36716	15.7875	15.05	15.7517	56.2317	69.1583	66.3442	6.83353	4.47592	5.63744
596	low	1	2009-07-29	2009	6	6	2476.03	3.39376	3.76257	17.2414	0	2.93952	1	9.84	9.31	9.83	74.269	75.0759	73.746	2.74486	2.61324	3.00677	3.69416	2.83696	2.36716	15.7875	15.05	15.7517	56.2317	69.1583	66.3442	6.83353	4.47592	5.63744
597	low	1	2009-07-29	2009	6	6	2476.03	3.39376	3.76257	17.2414	0	2.93952	1	9.84	9.31	9.83	74.269	75.0759	73.746	2.74486	2.61324	3.00677	3.69416	2.83696	2.36716	15.7875	15.05	15.7517	56.2317	69.1583	66.3442	6.83353	4.47592	5.63744
598	low	1	2009-07-29	2009	6	6	2476.03	3.39376	3.76257	17.2414	1	2.93952	1	9.84	9.31	9.83	74.269	75.0759	73.746	2.74486	2.61324	3.00677	3.69416	2.83696	2.36716	15.7875	15.05	15.7517	56.2317	69.1583	66.3442	6.83353	4.47592	5.63744
599	low	1	2009-07-29	2009	6	6	2476.03	3.39376	3.76257	17.2414	0	2.93952	1	9.84	9.31	9.83	74.269	75.0759	73.746	2.74486	2.61324	3.00677	3.69416	2.83696	2.36716	15.7875	15.05	15.7517	56.2317	69.1583	66.3442	6.83353	4.47592	5.63744
600	low	1	2009-07-29	2009	6	6	2476.03	3.39376	3.76257	17.2414	0	2.93952	1	9.84	9.31	9.83	74.269	75.0759	73.746	2.74486	2.61324	3.00677	3.69416	2.83696	2.36716	15.7875	15.05	15.7517	56.2317	69.1583	66.3442	6.83353	4.47592	5.63744
601	low	1	2009-07-29	2009	6	6	2476.03	3.39376	3.76257	17.2414	0	2.93952	1	9.84	9.31	9.83	74.269	75.0759	73.746	2.74486	2.61324	3.00677	3.69416	2.83696	2.36716	15.7875	15.05	15.7517	56.2317	69.1583	66.3442	6.83353	4.47592	5.63744
602	low	1	2009-07-29	2009	6	6	2476.03	3.39376	3.76257	17.2414	0	2.93952	1	9.84	9.31	9.83	74.269	75.0759	73.746	2.74486	2.61324	3.00677	3.69416	2.83696	2.36716	15.7875	15.05	15.7517	56.2317	69.1583	66.3442	6.83353	4.47592	5.63744
603	low	1	2009-07-29	2009	6	6	2476.03	3.39376	3.76257	17.2414	0	2.93952	1	9.84	9.31	9.83	74.269	75.0759	73.746	2.74486	2.61324	3.00677	3.69416	2.83696	2.36716	15.7875	15.05	15.7517	56.2317	69.1583	66.3442	6.83353	4.47592	5.63744
604	low	1	2009-08-27	2009	6	6	2476.03	3.39376	3.76257	17.2414	1	2.95085	1	9.84	9.31	9.83	74.269	75.0759	73.746	2.74486	2.61324	3.00677	3.69416	2.83696	2.36716	15.7875	15.05	15.7517	56.2317	69.1583	66.3442	6.83353	4.47592	5.63744
605	low	1	2009-08-27	2009	6	6	2476.03	3.39376	3.76257	17.2414	0	2.95085	1	9.84	9.31	9.83	74.269	75.0759	73.746	2.74486	2.61324	3.00677	3.69416	2.83696	2.36716	15.7875	15.05	15.7517	56.2317	69.1583	66.3442	6.83353	4.47592	5.63744
606	low	1	2009-08-27	2009	6	6	2476.03	3.39376	3.76257	17.2414	0	2.95085	1	9.84	9.31	9.83	74.269	75.0759	73.746	2.74486	2.61324	3.00677	3.69416	2.83696	2.36716	15.7875	15.05	15.7517	56.2317	69.1583	66.3442	6.83353	4.47592	5.63744
607	low	1	2009-08-27	2009	6	6	2476.03	3.39376	3.76257	17.2414	0	2.95085	1	9.84	9.31	9.83	74.269	75.0759	73.746	2.74486	2.61324	3.00677	3.69416	2.83696	2.36716	15.7875	15.05	15.7517	56.2317	69.1583	66.3442	6.83353	4.47592	5.63744
608	low	1	2009-08-27	2009	6	6	2476.03	3.39376	3.76257	17.2414	0	2.95085	1	9.84	9.31	9.83	74.269	75.0759	73.746	2.74486	2.61324	3.00677	3.69416	2.83696	2.36716	15.7875	15.05	15.7517	56.2317	69.1583	66.3442	6.83353	4.47592	5.63744
609	low	1	2009-08-27	2009	6	6	2476.03	3.39376	3.76257	17.2414	1	2.95085	1	9.84	9.31	9.83	74.269	75.0759	73.746	2.74486	2.61324	3.00677	3.69416	2.83696	2.36716	15.7875	15.05	15.7517	56.2317	69.1583	66.3442	6.83353	4.47592	5.63744
610	low	1	2009-08-27	2009	6	6	2476.03	3.39376	3.76257	17.2414	0	2.95085	1	9.84	9.31	9.83	74.269	75.0759	73.746	2.74486	2.61324	3.00677	3.69416	2.83696	2.36716	15.7875	15.05	15.7517	56.2317	69.1583	66.3442	6.83353	4.47592	5.63744
611	low	1	2009-08-27	2009	6	6	2476.03	3.39376	3.76257	17.2414	0	2.95085	1	9.84	9.31	9.83	74.269	75.0759	73.746	2.74486	2.61324	3.00677	3.69416	2.83696	2.36716	15.7875	15.05	15.7517	56.2317	69.1583	66.3442	6.83353	4.47592	5.63744
612	low	1	2009-08-27	2009	6	6	2476.03	3.39376	3.76257	17.2414	0	2.95085	1	9.84	9.31	9.83	74.269	75.0759	73.746	2.74486	2.61324	3.00677	3.69416	2.83696	2.36716	15.7875	15.05	15.7517	56.2317	69.1583	66.3442	6.83353	4.47592	5.63744
613	low	1	2009-08-27	2009	6	6	2476.03	3.39376	3.76257	17.2414	0	2.95085	1	9.84	9.31	9.83	74.269	75.0759	73.746	2.74486	2.61324	3.00677	3.69416	2.83696	2.36716	15.7875	15.05	15.7517	56.2317	69.1583	66.3442	6.83353	4.47592	5.63744
614	low	1	2009-08-27	2009	6	6	2476.03	3.39376	3.76257	17.2414	1	2.95085	1	9.84	9.31	9.83	74.269	75.0759	73.746	2.74486	2.61324	3.00677	3.69416	2.83696	2.36716	15.7875	15.05	15.7517	56.2317	69.1583	66.3442	6.83353	4.47592	5.63744
615	low	1	2009-08-27	2009	6	6	2476.03	3.39376	3.76257	17.2414	0	2.95085	1	9.84	9.31	9.83	74.269	75.0759	73.746	2.74486	2.61324	3.00677	3.69416	2.83696	2.36716	15.7875	15.05	15.7517	56.2317	69.1583	66.3442	6.83353	4.47592	5.63744
616	low	1	2009-08-27	2009	6	6	2476.03	3.39376	3.76257	17.2414	0	2.95085	1	9.84	9.31	9.83	74.269	75.0759	73.746	2.74486	2.61324	3.00677	3.69416	2.83696	2.36716	15.7875	15.05	15.7517	56.2317	69.1583	66.3442	6.83353	4.47592	5.63744
617	low	1	2009-08-27	2009	6	6	2476.03	3.39376	3.76257	17.2414	0	2.95085	1	9.84	9.31	9.83	74.269	75.0759	73.746	2.74486	2.61324	3.00677	3.69416	2.83696	2.36716	15.7875	15.05	15.7517	56.2317	69.1583	66.3442	6.83353	4.47592	5.63744
618	low	1	2009-08-27	2009	6	6	2476.03	3.39376	3.76257	17.2414	0	2.95085	1	9.84	9.31	9.83	74.269	75.0759	73.746	2.74486	2.61324	3.00677	3.69416	2.83696	2.36716	15.7875	15.05	15.7517	56.2317	69.1583	66.3442	6.83353	4.47592	5.63744
619	low	1	2009-08-27	2009	6	6	2476.03	3.39376	3.76257	17.2414	1	2.95085	1	9.84	9.31	9.83	74.269	75.0759	73.746	2.74486	2.61324	3.00677	3.69416	2.83696	2.36716	15.7875	15.05	15.7517	56.2317	69.1583	66.3442	6.83353	4.47592	5.63744
620	low	1	2009-10-05	2009	6	6	2476.03	3.39376	3.76257	17.2414	0	2.93247	1	9.84	9.31	9.83	74.269	75.0759	73.746	2.74486	2.61324	3.00677	3.69416	2.83696	2.36716	15.7875	15.05	15.7517	56.2317	69.1583	66.3442	6.83353	4.47592	5.63744
621	low	1	2009-10-05	2009	6	6	2476.03	3.39376	3.76257	17.2414	0	2.93247	1	9.84	9.31	9.83	74.269	75.0759	73.746	2.74486	2.61324	3.00677	3.69416	2.83696	2.36716	15.7875	15.05	15.7517	56.2317	69.1583	66.3442	6.83353	4.47592	5.63744
622	low	1	2009-10-05	2009	6	6	2476.03	3.39376	3.76257	17.2414	1	2.93247	1	9.84	9.31	9.83	74.269	75.0759	73.746	2.74486	2.61324	3.00677	3.69416	2.83696	2.36716	15.7875	15.05	15.7517	56.2317	69.1583	66.3442	6.83353	4.47592	5.63744
623	low	1	2009-10-05	2009	6	6	2476.03	3.39376	3.76257	17.2414	0	2.93247	1	9.84	9.31	9.83	74.269	75.0759	73.746	2.74486	2.61324	3.00677	3.69416	2.83696	2.36716	15.7875	15.05	15.7517	56.2317	69.1583	66.3442	6.83353	4.47592	5.63744
624	low	1	2009-10-05	2009	6	6	2476.03	3.39376	3.76257	17.2414	0	2.93247	1	9.84	9.31	9.83	74.269	75.0759	73.746	2.74486	2.61324	3.00677	3.69416	2.83696	2.36716	15.7875	15.05	15.7517	56.2317	69.1583	66.3442	6.83353	4.47592	5.63744
625	low	1	2009-10-05	2009	6	6	2476.03	3.39376	3.76257	17.2414	0	2.93247	1	9.84	9.31	9.83	74.269	75.0759	73.746	2.74486	2.61324	3.00677	3.69416	2.83696	2.36716	15.7875	15.05	15.7517	56.2317	69.1583	66.3442	6.83353	4.47592	5.63744
626	low	1	2009-10-05	2009	6	6	2476.03	3.39376	3.76257	17.2414	0	2.93247	1	9.84	9.31	9.83	74.269	75.0759	73.746	2.74486	2.61324	3.00677	3.69416	2.83696	2.36716	15.7875	15.05	15.7517	56.2317	69.1583	66.3442	6.83353	4.47592	5.63744
627	low	1	2009-10-05	2009	6	6	2476.03	3.39376	3.76257	17.2414	0	2.93247	1	9.84	9.31	9.83	74.269	75.0759	73.746	2.74486	2.61324	3.00677	3.69416	2.83696	2.36716	15.7875	15.05	15.7517	56.2317	69.1583	66.3442	6.83353	4.47592	5.63744
628	low	1	2009-10-27	2009	6	6	2476.03	3.39376	3.76257	17.2414	1	2.92221	1	9.84	9.31	9.83	74.269	75.0759	73.746	2.74486	2.61324	3.00677	3.69416	2.83696	2.36716	15.7875	15.05	15.7517	56.2317	69.1583	66.3442	6.83353	4.47592	5.63744
629	low	1	2009-10-27	2009	6	6	2476.03	3.39376	3.76257	17.2414	1	2.92221	1	9.84	9.31	9.83	74.269	75.0759	73.746	2.74486	2.61324	3.00677	3.69416	2.83696	2.36716	15.7875	15.05	15.7517	56.2317	69.1583	66.3442	6.83353	4.47592	5.63744
630	low	1	2009-10-27	2009	6	6	2476.03	3.39376	3.76257	17.2414	0	2.92221	1	9.84	9.31	9.83	74.269	75.0759	73.746	2.74486	2.61324	3.00677	3.69416	2.83696	2.36716	15.7875	15.05	15.7517	56.2317	69.1583	66.3442	6.83353	4.47592	5.63744
631	low	1	2009-10-27	2009	6	6	2476.03	3.39376	3.76257	17.2414	0	2.92221	1	9.84	9.31	9.83	74.269	75.0759	73.746	2.74486	2.61324	3.00677	3.69416	2.83696	2.36716	15.7875	15.05	15.7517	56.2317	69.1583	66.3442	6.83353	4.47592	5.63744
632	low	1	2009-10-27	2009	6	6	2476.03	3.39376	3.76257	17.2414	0	2.92221	1	9.84	9.31	9.83	74.269	75.0759	73.746	2.74486	2.61324	3.00677	3.69416	2.83696	2.36716	15.7875	15.05	15.7517	56.2317	69.1583	66.3442	6.83353	4.47592	5.63744
633	low	1	2009-10-27	2009	6	6	2476.03	3.39376	3.76257	17.2414	0	2.92221	1	9.84	9.31	9.83	74.269	75.0759	73.746	2.74486	2.61324	3.00677	3.69416	2.83696	2.36716	15.7875	15.05	15.7517	56.2317	69.1583	66.3442	6.83353	4.47592	5.63744
634	low	1	2009-10-27	2009	6	6	2476.03	3.39376	3.76257	17.2414	0	2.92221	1	9.84	9.31	9.83	74.269	75.0759	73.746	2.74486	2.61324	3.00677	3.69416	2.83696	2.36716	15.7875	15.05	15.7517	56.2317	69.1583	66.3442	6.83353	4.47592	5.63744
635	low	1	2009-10-27	2009	6	6	2476.03	3.39376	3.76257	17.2414	0	2.92221	1	9.84	9.31	9.83	74.269	75.0759	73.746	2.74486	2.61324	3.00677	3.69416	2.83696	2.36716	15.7875	15.05	15.7517	56.2317	69.1583	66.3442	6.83353	4.47592	5.63744
636	low	1	2009-10-27	2009	6	6	2476.03	3.39376	3.76257	17.2414	1	2.92221	1	9.84	9.31	9.83	74.269	75.0759	73.746	2.74486	2.61324	3.00677	3.69416	2.83696	2.36716	15.7875	15.05	15.7517	56.2317	69.1583	66.3442	6.83353	4.47592	5.63744
637	low	1	2009-10-27	2009	6	6	2476.03	3.39376	3.76257	17.2414	0	2.92221	1	9.84	9.31	9.83	74.269	75.0759	73.746	2.74486	2.61324	3.00677	3.69416	2.83696	2.36716	15.7875	15.05	15.7517	56.2317	69.1583	66.3442	6.83353	4.47592	5.63744
638	low	1	2009-10-27	2009	6	6	2476.03	3.39376	3.76257	17.2414	0	2.92221	1	9.84	9.31	9.83	74.269	75.0759	73.746	2.74486	2.61324	3.00677	3.69416	2.83696	2.36716	15.7875	15.05	15.7517	56.2317	69.1583	66.3442	6.83353	4.47592	5.63744
639	low	1	2009-10-27	2009	6	6	2476.03	3.39376	3.76257	17.2414	0	2.92221	1	9.84	9.31	9.83	74.269	75.0759	73.746	2.74486	2.61324	3.00677	3.69416	2.83696	2.36716	15.7875	15.05	15.7517	56.2317	69.1583	66.3442	6.83353	4.47592	5.63744
640	low	1	2009-11-19	2009	6	6	2476.03	3.39376	3.76257	17.2414	0	3.18298	1	9.84	9.31	9.83	74.269	75.0759	73.746	2.74486	2.61324	3.00677	3.69416	2.83696	2.36716	15.7875	15.05	15.7517	56.2317	69.1583	66.3442	6.83353	4.47592	5.63744
641	low	1	2009-11-19	2009	6	6	2476.03	3.39376	3.76257	17.2414	0	3.18298	1	9.84	9.31	9.83	74.269	75.0759	73.746	2.74486	2.61324	3.00677	3.69416	2.83696	2.36716	15.7875	15.05	15.7517	56.2317	69.1583	66.3442	6.83353	4.47592	5.63744
642	low	1	2009-11-19	2009	6	6	2476.03	3.39376	3.76257	17.2414	0	3.18298	1	9.84	9.31	9.83	74.269	75.0759	73.746	2.74486	2.61324	3.00677	3.69416	2.83696	2.36716	15.7875	15.05	15.7517	56.2317	69.1583	66.3442	6.83353	4.47592	5.63744
643	low	1	2009-11-19	2009	6	6	2476.03	3.39376	3.76257	17.2414	0	3.18298	1	9.84	9.31	9.83	74.269	75.0759	73.746	2.74486	2.61324	3.00677	3.69416	2.83696	2.36716	15.7875	15.05	15.7517	56.2317	69.1583	66.3442	6.83353	4.47592	5.63744
644	low	1	2009-11-19	2009	6	6	2476.03	3.39376	3.76257	17.2414	0	3.18298	1	9.84	9.31	9.83	74.269	75.0759	73.746	2.74486	2.61324	3.00677	3.69416	2.83696	2.36716	15.7875	15.05	15.7517	56.2317	69.1583	66.3442	6.83353	4.47592	5.63744
645	low	1	2009-11-19	2009	6	6	2476.03	3.39376	3.76257	17.2414	0	3.18298	1	9.84	9.31	9.83	74.269	75.0759	73.746	2.74486	2.61324	3.00677	3.69416	2.83696	2.36716	15.7875	15.05	15.7517	56.2317	69.1583	66.3442	6.83353	4.47592	5.63744
646	low	1	2009-11-19	2009	6	6	2476.03	3.39376	3.76257	17.2414	0	3.18298	1	9.84	9.31	9.83	74.269	75.0759	73.746	2.74486	2.61324	3.00677	3.69416	2.83696	2.36716	15.7875	15.05	15.7517	56.2317	69.1583	66.3442	6.83353	4.47592	5.63744
647	low	1	2009-11-19	2009	6	6	2476.03	3.39376	3.76257	17.2414	0	3.18298	1	9.84	9.31	9.83	74.269	75.0759	73.746	2.74486	2.61324	3.00677	3.69416	2.83696	2.36716	15.7875	15.05	15.7517	56.2317	69.1583	66.3442	6.83353	4.47592	5.63744
648	low	1	2009-11-19	2009	6	6	2476.03	3.39376	3.76257	17.2414	0	3.18298	1	9.84	9.31	9.83	74.269	75.0759	73.746	2.74486	2.61324	3.00677	3.69416	2.83696	2.36716	15.7875	15.05	15.7517	56.2317	69.1583	66.3442	6.83353	4.47592	5.63744
649	low	1	2010-03-03	2010	7	7	1952.3	3.29055	3.39376	17.7305	0	2.90255	1	9.31	9.83	8.74	75.0759	73.746	73.7561	2.61324	3.00677	2.82423	2.83696	2.36716	2.20622	15.05	15.7517	13.45	69.1583	66.3442	63.2983	4.47592	5.63744	5.58844
650	low	1	2010-03-03	2010	7	7	1952.3	3.29055	3.39376	17.7305	0	2.90255	1	9.31	9.83	8.74	75.0759	73.746	73.7561	2.61324	3.00677	2.82423	2.83696	2.36716	2.20622	15.05	15.7517	13.45	69.1583	66.3442	63.2983	4.47592	5.63744	5.58844
651	low	1	2010-03-03	2010	7	7	1952.3	3.29055	3.39376	17.7305	0	2.90255	1	9.31	9.83	8.74	75.0759	73.746	73.7561	2.61324	3.00677	2.82423	2.83696	2.36716	2.20622	15.05	15.7517	13.45	69.1583	66.3442	63.2983	4.47592	5.63744	5.58844
652	low	1	2010-03-03	2010	7	7	1952.3	3.29055	3.39376	17.7305	0	2.90255	1	9.31	9.83	8.74	75.0759	73.746	73.7561	2.61324	3.00677	2.82423	2.83696	2.36716	2.20622	15.05	15.7517	13.45	69.1583	66.3442	63.2983	4.47592	5.63744	5.58844
653	low	1	2010-03-03	2010	7	7	1952.3	3.29055	3.39376	17.7305	0	2.90255	1	9.31	9.83	8.74	75.0759	73.746	73.7561	2.61324	3.00677	2.82423	2.83696	2.36716	2.20622	15.05	15.7517	13.45	69.1583	66.3442	63.2983	4.47592	5.63744	5.58844
654	low	1	2010-03-03	2010	7	7	1952.3	3.29055	3.39376	17.7305	0	2.90255	1	9.31	9.83	8.74	75.0759	73.746	73.7561	2.61324	3.00677	2.82423	2.83696	2.36716	2.20622	15.05	15.7517	13.45	69.1583	66.3442	63.2983	4.47592	5.63744	5.58844
655	low	1	2010-03-23	2010	7	7	1952.3	3.29055	3.39376	17.7305	0	2.91751	1	9.31	9.83	8.74	75.0759	73.746	73.7561	2.61324	3.00677	2.82423	2.83696	2.36716	2.20622	15.05	15.7517	13.45	69.1583	66.3442	63.2983	4.47592	5.63744	5.58844
656	low	1	2010-03-23	2010	7	7	1952.3	3.29055	3.39376	17.7305	0	2.91751	1	9.31	9.83	8.74	75.0759	73.746	73.7561	2.61324	3.00677	2.82423	2.83696	2.36716	2.20622	15.05	15.7517	13.45	69.1583	66.3442	63.2983	4.47592	5.63744	5.58844
657	low	1	2010-03-23	2010	7	7	1952.3	3.29055	3.39376	17.7305	0	2.91751	1	9.31	9.83	8.74	75.0759	73.746	73.7561	2.61324	3.00677	2.82423	2.83696	2.36716	2.20622	15.05	15.7517	13.45	69.1583	66.3442	63.2983	4.47592	5.63744	5.58844
658	low	1	2010-03-23	2010	7	7	1952.3	3.29055	3.39376	17.7305	0	2.91751	1	9.31	9.83	8.74	75.0759	73.746	73.7561	2.61324	3.00677	2.82423	2.83696	2.36716	2.20622	15.05	15.7517	13.45	69.1583	66.3442	63.2983	4.47592	5.63744	5.58844
659	low	1	2010-03-23	2010	7	7	1952.3	3.29055	3.39376	17.7305	0	2.91751	1	9.31	9.83	8.74	75.0759	73.746	73.7561	2.61324	3.00677	2.82423	2.83696	2.36716	2.20622	15.05	15.7517	13.45	69.1583	66.3442	63.2983	4.47592	5.63744	5.58844
660	low	1	2010-03-23	2010	7	7	1952.3	3.29055	3.39376	17.7305	0	2.91751	1	9.31	9.83	8.74	75.0759	73.746	73.7561	2.61324	3.00677	2.82423	2.83696	2.36716	2.20622	15.05	15.7517	13.45	69.1583	66.3442	63.2983	4.47592	5.63744	5.58844
661	low	1	2010-03-23	2010	7	7	1952.3	3.29055	3.39376	17.7305	1	2.91751	1	9.31	9.83	8.74	75.0759	73.746	73.7561	2.61324	3.00677	2.82423	2.83696	2.36716	2.20622	15.05	15.7517	13.45	69.1583	66.3442	63.2983	4.47592	5.63744	5.58844
662	low	1	2010-03-23	2010	7	7	1952.3	3.29055	3.39376	17.7305	1	2.91751	1	9.31	9.83	8.74	75.0759	73.746	73.7561	2.61324	3.00677	2.82423	2.83696	2.36716	2.20622	15.05	15.7517	13.45	69.1583	66.3442	63.2983	4.47592	5.63744	5.58844
663	low	1	2010-03-23	2010	7	7	1952.3	3.29055	3.39376	17.7305	0	2.91751	1	9.31	9.83	8.74	75.0759	73.746	73.7561	2.61324	3.00677	2.82423	2.83696	2.36716	2.20622	15.05	15.7517	13.45	69.1583	66.3442	63.2983	4.47592	5.63744	5.58844
664	low	1	2010-03-23	2010	7	7	1952.3	3.29055	3.39376	17.7305	0	2.91751	1	9.31	9.83	8.74	75.0759	73.746	73.7561	2.61324	3.00677	2.82423	2.83696	2.36716	2.20622	15.05	15.7517	13.45	69.1583	66.3442	63.2983	4.47592	5.63744	5.58844
665	low	1	2010-03-23	2010	7	7	1952.3	3.29055	3.39376	17.7305	0	2.91751	1	9.31	9.83	8.74	75.0759	73.746	73.7561	2.61324	3.00677	2.82423	2.83696	2.36716	2.20622	15.05	15.7517	13.45	69.1583	66.3442	63.2983	4.47592	5.63744	5.58844
666	low	1	2010-03-23	2010	7	7	1952.3	3.29055	3.39376	17.7305	1	2.91751	1	9.31	9.83	8.74	75.0759	73.746	73.7561	2.61324	3.00677	2.82423	2.83696	2.36716	2.20622	15.05	15.7517	13.45	69.1583	66.3442	63.2983	4.47592	5.63744	5.58844
667	low	1	2010-03-23	2010	7	7	1952.3	3.29055	3.39376	17.7305	0	2.91751	1	9.31	9.83	8.74	75.0759	73.746	73.7561	2.61324	3.00677	2.82423	2.83696	2.36716	2.20622	15.05	15.7517	13.45	69.1583	66.3442	63.2983	4.47592	5.63744	5.58844
668	low	1	2010-03-23	2010	7	7	1952.3	3.29055	3.39376	17.7305	1	2.91751	1	9.31	9.83	8.74	75.0759	73.746	73.7561	2.61324	3.00677	2.82423	2.83696	2.36716	2.20622	15.05	15.7517	13.45	69.1583	66.3442	63.2983	4.47592	5.63744	5.58844
669	low	1	2010-03-23	2010	7	7	1952.3	3.29055	3.39376	17.7305	0	2.91751	1	9.31	9.83	8.74	75.0759	73.746	73.7561	2.61324	3.00677	2.82423	2.83696	2.36716	2.20622	15.05	15.7517	13.45	69.1583	66.3442	63.2983	4.47592	5.63744	5.58844
670	low	1	2010-03-23	2010	7	7	1952.3	3.29055	3.39376	17.7305	0	2.91751	1	9.31	9.83	8.74	75.0759	73.746	73.7561	2.61324	3.00677	2.82423	2.83696	2.36716	2.20622	15.05	15.7517	13.45	69.1583	66.3442	63.2983	4.47592	5.63744	5.58844
671	low	1	2010-03-23	2010	7	7	1952.3	3.29055	3.39376	17.7305	0	2.91751	1	9.31	9.83	8.74	75.0759	73.746	73.7561	2.61324	3.00677	2.82423	2.83696	2.36716	2.20622	15.05	15.7517	13.45	69.1583	66.3442	63.2983	4.47592	5.63744	5.58844
672	low	1	2010-03-23	2010	7	7	1952.3	3.29055	3.39376	17.7305	1	2.91751	1	9.31	9.83	8.74	75.0759	73.746	73.7561	2.61324	3.00677	2.82423	2.83696	2.36716	2.20622	15.05	15.7517	13.45	69.1583	66.3442	63.2983	4.47592	5.63744	5.58844
673	low	1	2010-03-23	2010	7	7	1952.3	3.29055	3.39376	17.7305	0	2.91751	1	9.31	9.83	8.74	75.0759	73.746	73.7561	2.61324	3.00677	2.82423	2.83696	2.36716	2.20622	15.05	15.7517	13.45	69.1583	66.3442	63.2983	4.47592	5.63744	5.58844
674	low	1	2010-03-23	2010	7	7	1952.3	3.29055	3.39376	17.7305	0	2.91751	1	9.31	9.83	8.74	75.0759	73.746	73.7561	2.61324	3.00677	2.82423	2.83696	2.36716	2.20622	15.05	15.7517	13.45	69.1583	66.3442	63.2983	4.47592	5.63744	5.58844
675	low	1	2010-04-28	2010	7	7	1952.3	3.29055	3.39376	17.7305	0	3.54245	1	9.31	9.83	8.74	75.0759	73.746	73.7561	2.61324	3.00677	2.82423	2.83696	2.36716	2.20622	15.05	15.7517	13.45	69.1583	66.3442	63.2983	4.47592	5.63744	5.58844
676	low	1	2010-04-28	2010	7	7	1952.3	3.29055	3.39376	17.7305	0	3.54245	1	9.31	9.83	8.74	75.0759	73.746	73.7561	2.61324	3.00677	2.82423	2.83696	2.36716	2.20622	15.05	15.7517	13.45	69.1583	66.3442	63.2983	4.47592	5.63744	5.58844
677	low	1	2010-04-28	2010	7	7	1952.3	3.29055	3.39376	17.7305	0	3.54245	1	9.31	9.83	8.74	75.0759	73.746	73.7561	2.61324	3.00677	2.82423	2.83696	2.36716	2.20622	15.05	15.7517	13.45	69.1583	66.3442	63.2983	4.47592	5.63744	5.58844
678	low	1	2010-04-28	2010	7	7	1952.3	3.29055	3.39376	17.7305	0	3.54245	1	9.31	9.83	8.74	75.0759	73.746	73.7561	2.61324	3.00677	2.82423	2.83696	2.36716	2.20622	15.05	15.7517	13.45	69.1583	66.3442	63.2983	4.47592	5.63744	5.58844
679	low	1	2010-04-28	2010	7	7	1952.3	3.29055	3.39376	17.7305	0	3.54245	1	9.31	9.83	8.74	75.0759	73.746	73.7561	2.61324	3.00677	2.82423	2.83696	2.36716	2.20622	15.05	15.7517	13.45	69.1583	66.3442	63.2983	4.47592	5.63744	5.58844
680	low	1	2010-04-28	2010	7	7	1952.3	3.29055	3.39376	17.7305	1	3.54245	1	9.31	9.83	8.74	75.0759	73.746	73.7561	2.61324	3.00677	2.82423	2.83696	2.36716	2.20622	15.05	15.7517	13.45	69.1583	66.3442	63.2983	4.47592	5.63744	5.58844
681	low	1	2010-04-28	2010	7	7	1952.3	3.29055	3.39376	17.7305	0	3.54245	1	9.31	9.83	8.74	75.0759	73.746	73.7561	2.61324	3.00677	2.82423	2.83696	2.36716	2.20622	15.05	15.7517	13.45	69.1583	66.3442	63.2983	4.47592	5.63744	5.58844
682	low	1	2010-04-28	2010	7	7	1952.3	3.29055	3.39376	17.7305	0	3.54245	1	9.31	9.83	8.74	75.0759	73.746	73.7561	2.61324	3.00677	2.82423	2.83696	2.36716	2.20622	15.05	15.7517	13.45	69.1583	66.3442	63.2983	4.47592	5.63744	5.58844
683	low	1	2010-04-28	2010	7	7	1952.3	3.29055	3.39376	17.7305	0	3.54245	1	9.31	9.83	8.74	75.0759	73.746	73.7561	2.61324	3.00677	2.82423	2.83696	2.36716	2.20622	15.05	15.7517	13.45	69.1583	66.3442	63.2983	4.47592	5.63744	5.58844
684	low	1	2010-04-28	2010	7	7	1952.3	3.29055	3.39376	17.7305	0	3.54245	1	9.31	9.83	8.74	75.0759	73.746	73.7561	2.61324	3.00677	2.82423	2.83696	2.36716	2.20622	15.05	15.7517	13.45	69.1583	66.3442	63.2983	4.47592	5.63744	5.58844
685	low	1	2010-04-28	2010	7	7	1952.3	3.29055	3.39376	17.7305	0	3.54245	1	9.31	9.83	8.74	75.0759	73.746	73.7561	2.61324	3.00677	2.82423	2.83696	2.36716	2.20622	15.05	15.7517	13.45	69.1583	66.3442	63.2983	4.47592	5.63744	5.58844
686	low	1	2010-04-28	2010	7	7	1952.3	3.29055	3.39376	17.7305	0	3.54245	1	9.31	9.83	8.74	75.0759	73.746	73.7561	2.61324	3.00677	2.82423	2.83696	2.36716	2.20622	15.05	15.7517	13.45	69.1583	66.3442	63.2983	4.47592	5.63744	5.58844
687	low	1	2010-04-28	2010	7	7	1952.3	3.29055	3.39376	17.7305	1	3.54245	1	9.31	9.83	8.74	75.0759	73.746	73.7561	2.61324	3.00677	2.82423	2.83696	2.36716	2.20622	15.05	15.7517	13.45	69.1583	66.3442	63.2983	4.47592	5.63744	5.58844
688	low	1	2010-04-28	2010	7	7	1952.3	3.29055	3.39376	17.7305	1	3.54245	1	9.31	9.83	8.74	75.0759	73.746	73.7561	2.61324	3.00677	2.82423	2.83696	2.36716	2.20622	15.05	15.7517	13.45	69.1583	66.3442	63.2983	4.47592	5.63744	5.58844
689	low	1	2010-04-28	2010	7	7	1952.3	3.29055	3.39376	17.7305	0	3.54245	1	9.31	9.83	8.74	75.0759	73.746	73.7561	2.61324	3.00677	2.82423	2.83696	2.36716	2.20622	15.05	15.7517	13.45	69.1583	66.3442	63.2983	4.47592	5.63744	5.58844
690	low	1	2010-04-28	2010	7	7	1952.3	3.29055	3.39376	17.7305	0	3.54245	1	9.31	9.83	8.74	75.0759	73.746	73.7561	2.61324	3.00677	2.82423	2.83696	2.36716	2.20622	15.05	15.7517	13.45	69.1583	66.3442	63.2983	4.47592	5.63744	5.58844
691	low	1	2010-04-28	2010	7	7	1952.3	3.29055	3.39376	17.7305	0	3.54245	1	9.31	9.83	8.74	75.0759	73.746	73.7561	2.61324	3.00677	2.82423	2.83696	2.36716	2.20622	15.05	15.7517	13.45	69.1583	66.3442	63.2983	4.47592	5.63744	5.58844
692	low	1	2010-04-28	2010	7	7	1952.3	3.29055	3.39376	17.7305	0	3.54245	1	9.31	9.83	8.74	75.0759	73.746	73.7561	2.61324	3.00677	2.82423	2.83696	2.36716	2.20622	15.05	15.7517	13.45	69.1583	66.3442	63.2983	4.47592	5.63744	5.58844
693	low	1	2010-04-28	2010	7	7	1952.3	3.29055	3.39376	17.7305	0	3.54245	1	9.31	9.83	8.74	75.0759	73.746	73.7561	2.61324	3.00677	2.82423	2.83696	2.36716	2.20622	15.05	15.7517	13.45	69.1583	66.3442	63.2983	4.47592	5.63744	5.58844
694	low	1	2010-04-28	2010	7	7	1952.3	3.29055	3.39376	17.7305	0	3.54245	1	9.31	9.83	8.74	75.0759	73.746	73.7561	2.61324	3.00677	2.82423	2.83696	2.36716	2.20622	15.05	15.7517	13.45	69.1583	66.3442	63.2983	4.47592	5.63744	5.58844
695	low	1	2010-05-21	2010	7	7	1952.3	3.29055	3.39376	17.7305	0	3.53706	1	9.31	9.83	8.74	75.0759	73.746	73.7561	2.61324	3.00677	2.82423	2.83696	2.36716	2.20622	15.05	15.7517	13.45	69.1583	66.3442	63.2983	4.47592	5.63744	5.58844
696	low	1	2010-05-21	2010	7	7	1952.3	3.29055	3.39376	17.7305	0	3.53706	1	9.31	9.83	8.74	75.0759	73.746	73.7561	2.61324	3.00677	2.82423	2.83696	2.36716	2.20622	15.05	15.7517	13.45	69.1583	66.3442	63.2983	4.47592	5.63744	5.58844
697	low	1	2010-05-21	2010	7	7	1952.3	3.29055	3.39376	17.7305	0	3.53706	1	9.31	9.83	8.74	75.0759	73.746	73.7561	2.61324	3.00677	2.82423	2.83696	2.36716	2.20622	15.05	15.7517	13.45	69.1583	66.3442	63.2983	4.47592	5.63744	5.58844
698	low	1	2010-05-21	2010	7	7	1952.3	3.29055	3.39376	17.7305	0	3.53706	1	9.31	9.83	8.74	75.0759	73.746	73.7561	2.61324	3.00677	2.82423	2.83696	2.36716	2.20622	15.05	15.7517	13.45	69.1583	66.3442	63.2983	4.47592	5.63744	5.58844
699	low	1	2010-05-21	2010	7	7	1952.3	3.29055	3.39376	17.7305	0	3.53706	1	9.31	9.83	8.74	75.0759	73.746	73.7561	2.61324	3.00677	2.82423	2.83696	2.36716	2.20622	15.05	15.7517	13.45	69.1583	66.3442	63.2983	4.47592	5.63744	5.58844
700	low	1	2010-05-21	2010	7	7	1952.3	3.29055	3.39376	17.7305	0	3.53706	1	9.31	9.83	8.74	75.0759	73.746	73.7561	2.61324	3.00677	2.82423	2.83696	2.36716	2.20622	15.05	15.7517	13.45	69.1583	66.3442	63.2983	4.47592	5.63744	5.58844
701	low	1	2010-05-21	2010	7	7	1952.3	3.29055	3.39376	17.7305	0	3.53706	1	9.31	9.83	8.74	75.0759	73.746	73.7561	2.61324	3.00677	2.82423	2.83696	2.36716	2.20622	15.05	15.7517	13.45	69.1583	66.3442	63.2983	4.47592	5.63744	5.58844
702	low	1	2010-05-21	2010	7	7	1952.3	3.29055	3.39376	17.7305	0	3.53706	1	9.31	9.83	8.74	75.0759	73.746	73.7561	2.61324	3.00677	2.82423	2.83696	2.36716	2.20622	15.05	15.7517	13.45	69.1583	66.3442	63.2983	4.47592	5.63744	5.58844
703	low	1	2010-05-21	2010	7	7	1952.3	3.29055	3.39376	17.7305	0	3.53706	1	9.31	9.83	8.74	75.0759	73.746	73.7561	2.61324	3.00677	2.82423	2.83696	2.36716	2.20622	15.05	15.7517	13.45	69.1583	66.3442	63.2983	4.47592	5.63744	5.58844
704	low	1	2010-05-21	2010	7	7	1952.3	3.29055	3.39376	17.7305	0	3.53706	1	9.31	9.83	8.74	75.0759	73.746	73.7561	2.61324	3.00677	2.82423	2.83696	2.36716	2.20622	15.05	15.7517	13.45	69.1583	66.3442	63.2983	4.47592	5.63744	5.58844
705	low	1	2010-05-21	2010	7	7	1952.3	3.29055	3.39376	17.7305	0	3.53706	1	9.31	9.83	8.74	75.0759	73.746	73.7561	2.61324	3.00677	2.82423	2.83696	2.36716	2.20622	15.05	15.7517	13.45	69.1583	66.3442	63.2983	4.47592	5.63744	5.58844
706	low	1	2010-05-21	2010	7	7	1952.3	3.29055	3.39376	17.7305	0	3.53706	1	9.31	9.83	8.74	75.0759	73.746	73.7561	2.61324	3.00677	2.82423	2.83696	2.36716	2.20622	15.05	15.7517	13.45	69.1583	66.3442	63.2983	4.47592	5.63744	5.58844
707	low	1	2010-05-21	2010	7	7	1952.3	3.29055	3.39376	17.7305	0	3.53706	1	9.31	9.83	8.74	75.0759	73.746	73.7561	2.61324	3.00677	2.82423	2.83696	2.36716	2.20622	15.05	15.7517	13.45	69.1583	66.3442	63.2983	4.47592	5.63744	5.58844
708	low	1	2010-05-21	2010	7	7	1952.3	3.29055	3.39376	17.7305	1	3.53706	1	9.31	9.83	8.74	75.0759	73.746	73.7561	2.61324	3.00677	2.82423	2.83696	2.36716	2.20622	15.05	15.7517	13.45	69.1583	66.3442	63.2983	4.47592	5.63744	5.58844
709	low	1	2010-05-21	2010	7	7	1952.3	3.29055	3.39376	17.7305	0	3.53706	1	9.31	9.83	8.74	75.0759	73.746	73.7561	2.61324	3.00677	2.82423	2.83696	2.36716	2.20622	15.05	15.7517	13.45	69.1583	66.3442	63.2983	4.47592	5.63744	5.58844
710	low	1	2010-05-21	2010	7	7	1952.3	3.29055	3.39376	17.7305	0	3.53706	1	9.31	9.83	8.74	75.0759	73.746	73.7561	2.61324	3.00677	2.82423	2.83696	2.36716	2.20622	15.05	15.7517	13.45	69.1583	66.3442	63.2983	4.47592	5.63744	5.58844
711	low	1	2010-05-21	2010	7	7	1952.3	3.29055	3.39376	17.7305	0	3.53706	1	9.31	9.83	8.74	75.0759	73.746	73.7561	2.61324	3.00677	2.82423	2.83696	2.36716	2.20622	15.05	15.7517	13.45	69.1583	66.3442	63.2983	4.47592	5.63744	5.58844
712	low	1	2010-05-21	2010	7	7	1952.3	3.29055	3.39376	17.7305	0	3.53706	1	9.31	9.83	8.74	75.0759	73.746	73.7561	2.61324	3.00677	2.82423	2.83696	2.36716	2.20622	15.05	15.7517	13.45	69.1583	66.3442	63.2983	4.47592	5.63744	5.58844
713	low	1	2010-05-21	2010	7	7	1952.3	3.29055	3.39376	17.7305	0	3.53706	1	9.31	9.83	8.74	75.0759	73.746	73.7561	2.61324	3.00677	2.82423	2.83696	2.36716	2.20622	15.05	15.7517	13.45	69.1583	66.3442	63.2983	4.47592	5.63744	5.58844
714	low	1	2010-05-21	2010	7	7	1952.3	3.29055	3.39376	17.7305	0	3.53706	1	9.31	9.83	8.74	75.0759	73.746	73.7561	2.61324	3.00677	2.82423	2.83696	2.36716	2.20622	15.05	15.7517	13.45	69.1583	66.3442	63.2983	4.47592	5.63744	5.58844
715	low	1	2010-06-22	2010	7	7	1952.3	3.29055	3.39376	17.7305	0	3.53466	1	9.31	9.83	8.74	75.0759	73.746	73.7561	2.61324	3.00677	2.82423	2.83696	2.36716	2.20622	15.05	15.7517	13.45	69.1583	66.3442	63.2983	4.47592	5.63744	5.58844
716	low	1	2010-06-22	2010	7	7	1952.3	3.29055	3.39376	17.7305	0	3.53466	1	9.31	9.83	8.74	75.0759	73.746	73.7561	2.61324	3.00677	2.82423	2.83696	2.36716	2.20622	15.05	15.7517	13.45	69.1583	66.3442	63.2983	4.47592	5.63744	5.58844
717	low	1	2010-06-22	2010	7	7	1952.3	3.29055	3.39376	17.7305	0	3.53466	1	9.31	9.83	8.74	75.0759	73.746	73.7561	2.61324	3.00677	2.82423	2.83696	2.36716	2.20622	15.05	15.7517	13.45	69.1583	66.3442	63.2983	4.47592	5.63744	5.58844
718	low	1	2010-06-22	2010	7	7	1952.3	3.29055	3.39376	17.7305	0	3.53466	1	9.31	9.83	8.74	75.0759	73.746	73.7561	2.61324	3.00677	2.82423	2.83696	2.36716	2.20622	15.05	15.7517	13.45	69.1583	66.3442	63.2983	4.47592	5.63744	5.58844
719	low	1	2010-06-22	2010	7	7	1952.3	3.29055	3.39376	17.7305	0	3.53466	1	9.31	9.83	8.74	75.0759	73.746	73.7561	2.61324	3.00677	2.82423	2.83696	2.36716	2.20622	15.05	15.7517	13.45	69.1583	66.3442	63.2983	4.47592	5.63744	5.58844
720	low	1	2010-06-22	2010	7	7	1952.3	3.29055	3.39376	17.7305	0	3.53466	1	9.31	9.83	8.74	75.0759	73.746	73.7561	2.61324	3.00677	2.82423	2.83696	2.36716	2.20622	15.05	15.7517	13.45	69.1583	66.3442	63.2983	4.47592	5.63744	5.58844
721	low	1	2010-06-22	2010	7	7	1952.3	3.29055	3.39376	17.7305	0	3.53466	1	9.31	9.83	8.74	75.0759	73.746	73.7561	2.61324	3.00677	2.82423	2.83696	2.36716	2.20622	15.05	15.7517	13.45	69.1583	66.3442	63.2983	4.47592	5.63744	5.58844
722	low	1	2010-06-22	2010	7	7	1952.3	3.29055	3.39376	17.7305	0	3.53466	1	9.31	9.83	8.74	75.0759	73.746	73.7561	2.61324	3.00677	2.82423	2.83696	2.36716	2.20622	15.05	15.7517	13.45	69.1583	66.3442	63.2983	4.47592	5.63744	5.58844
723	low	1	2010-06-22	2010	7	7	1952.3	3.29055	3.39376	17.7305	0	3.53466	1	9.31	9.83	8.74	75.0759	73.746	73.7561	2.61324	3.00677	2.82423	2.83696	2.36716	2.20622	15.05	15.7517	13.45	69.1583	66.3442	63.2983	4.47592	5.63744	5.58844
724	low	1	2010-06-22	2010	7	7	1952.3	3.29055	3.39376	17.7305	1	3.53466	1	9.31	9.83	8.74	75.0759	73.746	73.7561	2.61324	3.00677	2.82423	2.83696	2.36716	2.20622	15.05	15.7517	13.45	69.1583	66.3442	63.2983	4.47592	5.63744	5.58844
725	low	1	2010-06-22	2010	7	7	1952.3	3.29055	3.39376	17.7305	0	3.53466	1	9.31	9.83	8.74	75.0759	73.746	73.7561	2.61324	3.00677	2.82423	2.83696	2.36716	2.20622	15.05	15.7517	13.45	69.1583	66.3442	63.2983	4.47592	5.63744	5.58844
726	low	1	2010-06-22	2010	7	7	1952.3	3.29055	3.39376	17.7305	0	3.53466	1	9.31	9.83	8.74	75.0759	73.746	73.7561	2.61324	3.00677	2.82423	2.83696	2.36716	2.20622	15.05	15.7517	13.45	69.1583	66.3442	63.2983	4.47592	5.63744	5.58844
727	low	1	2010-06-22	2010	7	7	1952.3	3.29055	3.39376	17.7305	0	3.53466	1	9.31	9.83	8.74	75.0759	73.746	73.7561	2.61324	3.00677	2.82423	2.83696	2.36716	2.20622	15.05	15.7517	13.45	69.1583	66.3442	63.2983	4.47592	5.63744	5.58844
728	low	1	2010-06-22	2010	7	7	1952.3	3.29055	3.39376	17.7305	0	3.53466	1	9.31	9.83	8.74	75.0759	73.746	73.7561	2.61324	3.00677	2.82423	2.83696	2.36716	2.20622	15.05	15.7517	13.45	69.1583	66.3442	63.2983	4.47592	5.63744	5.58844
729	low	1	2010-06-22	2010	7	7	1952.3	3.29055	3.39376	17.7305	0	3.53466	1	9.31	9.83	8.74	75.0759	73.746	73.7561	2.61324	3.00677	2.82423	2.83696	2.36716	2.20622	15.05	15.7517	13.45	69.1583	66.3442	63.2983	4.47592	5.63744	5.58844
730	low	1	2010-06-22	2010	7	7	1952.3	3.29055	3.39376	17.7305	0	3.53466	1	9.31	9.83	8.74	75.0759	73.746	73.7561	2.61324	3.00677	2.82423	2.83696	2.36716	2.20622	15.05	15.7517	13.45	69.1583	66.3442	63.2983	4.47592	5.63744	5.58844
731	low	1	2010-06-22	2010	7	7	1952.3	3.29055	3.39376	17.7305	0	3.53466	1	9.31	9.83	8.74	75.0759	73.746	73.7561	2.61324	3.00677	2.82423	2.83696	2.36716	2.20622	15.05	15.7517	13.45	69.1583	66.3442	63.2983	4.47592	5.63744	5.58844
732	low	1	2010-06-22	2010	7	7	1952.3	3.29055	3.39376	17.7305	0	3.53466	1	9.31	9.83	8.74	75.0759	73.746	73.7561	2.61324	3.00677	2.82423	2.83696	2.36716	2.20622	15.05	15.7517	13.45	69.1583	66.3442	63.2983	4.47592	5.63744	5.58844
733	low	1	2010-06-22	2010	7	7	1952.3	3.29055	3.39376	17.7305	0	3.53466	1	9.31	9.83	8.74	75.0759	73.746	73.7561	2.61324	3.00677	2.82423	2.83696	2.36716	2.20622	15.05	15.7517	13.45	69.1583	66.3442	63.2983	4.47592	5.63744	5.58844
734	low	1	2010-06-22	2010	7	7	1952.3	3.29055	3.39376	17.7305	0	3.53466	1	9.31	9.83	8.74	75.0759	73.746	73.7561	2.61324	3.00677	2.82423	2.83696	2.36716	2.20622	15.05	15.7517	13.45	69.1583	66.3442	63.2983	4.47592	5.63744	5.58844
735	low	1	2010-07-27	2010	7	7	1952.3	3.29055	3.39376	17.7305	0	2.85914	1	9.31	9.83	8.74	75.0759	73.746	73.7561	2.61324	3.00677	2.82423	2.83696	2.36716	2.20622	15.05	15.7517	13.45	69.1583	66.3442	63.2983	4.47592	5.63744	5.58844
736	low	1	2010-07-27	2010	7	7	1952.3	3.29055	3.39376	17.7305	0	2.85914	1	9.31	9.83	8.74	75.0759	73.746	73.7561	2.61324	3.00677	2.82423	2.83696	2.36716	2.20622	15.05	15.7517	13.45	69.1583	66.3442	63.2983	4.47592	5.63744	5.58844
737	low	1	2010-07-27	2010	7	7	1952.3	3.29055	3.39376	17.7305	1	2.85914	1	9.31	9.83	8.74	75.0759	73.746	73.7561	2.61324	3.00677	2.82423	2.83696	2.36716	2.20622	15.05	15.7517	13.45	69.1583	66.3442	63.2983	4.47592	5.63744	5.58844
738	low	1	2010-07-27	2010	7	7	1952.3	3.29055	3.39376	17.7305	0	2.85914	1	9.31	9.83	8.74	75.0759	73.746	73.7561	2.61324	3.00677	2.82423	2.83696	2.36716	2.20622	15.05	15.7517	13.45	69.1583	66.3442	63.2983	4.47592	5.63744	5.58844
739	low	1	2010-07-27	2010	7	7	1952.3	3.29055	3.39376	17.7305	0	2.85914	1	9.31	9.83	8.74	75.0759	73.746	73.7561	2.61324	3.00677	2.82423	2.83696	2.36716	2.20622	15.05	15.7517	13.45	69.1583	66.3442	63.2983	4.47592	5.63744	5.58844
740	low	1	2010-07-27	2010	7	7	1952.3	3.29055	3.39376	17.7305	0	2.85914	1	9.31	9.83	8.74	75.0759	73.746	73.7561	2.61324	3.00677	2.82423	2.83696	2.36716	2.20622	15.05	15.7517	13.45	69.1583	66.3442	63.2983	4.47592	5.63744	5.58844
741	low	1	2010-07-27	2010	7	7	1952.3	3.29055	3.39376	17.7305	0	2.85914	1	9.31	9.83	8.74	75.0759	73.746	73.7561	2.61324	3.00677	2.82423	2.83696	2.36716	2.20622	15.05	15.7517	13.45	69.1583	66.3442	63.2983	4.47592	5.63744	5.58844
742	low	1	2010-07-27	2010	7	7	1952.3	3.29055	3.39376	17.7305	0	2.85914	1	9.31	9.83	8.74	75.0759	73.746	73.7561	2.61324	3.00677	2.82423	2.83696	2.36716	2.20622	15.05	15.7517	13.45	69.1583	66.3442	63.2983	4.47592	5.63744	5.58844
743	low	1	2010-07-27	2010	7	7	1952.3	3.29055	3.39376	17.7305	1	2.85914	1	9.31	9.83	8.74	75.0759	73.746	73.7561	2.61324	3.00677	2.82423	2.83696	2.36716	2.20622	15.05	15.7517	13.45	69.1583	66.3442	63.2983	4.47592	5.63744	5.58844
744	low	1	2010-07-27	2010	7	7	1952.3	3.29055	3.39376	17.7305	1	2.85914	1	9.31	9.83	8.74	75.0759	73.746	73.7561	2.61324	3.00677	2.82423	2.83696	2.36716	2.20622	15.05	15.7517	13.45	69.1583	66.3442	63.2983	4.47592	5.63744	5.58844
745	low	1	2010-07-27	2010	7	7	1952.3	3.29055	3.39376	17.7305	0	2.85914	1	9.31	9.83	8.74	75.0759	73.746	73.7561	2.61324	3.00677	2.82423	2.83696	2.36716	2.20622	15.05	15.7517	13.45	69.1583	66.3442	63.2983	4.47592	5.63744	5.58844
746	low	1	2010-08-26	2010	7	7	1952.3	3.29055	3.39376	17.7305	0	2.8537	1	9.31	9.83	8.74	75.0759	73.746	73.7561	2.61324	3.00677	2.82423	2.83696	2.36716	2.20622	15.05	15.7517	13.45	69.1583	66.3442	63.2983	4.47592	5.63744	5.58844
747	low	1	2010-08-26	2010	7	7	1952.3	3.29055	3.39376	17.7305	0	2.8537	1	9.31	9.83	8.74	75.0759	73.746	73.7561	2.61324	3.00677	2.82423	2.83696	2.36716	2.20622	15.05	15.7517	13.45	69.1583	66.3442	63.2983	4.47592	5.63744	5.58844
748	low	1	2010-08-26	2010	7	7	1952.3	3.29055	3.39376	17.7305	0	2.8537	1	9.31	9.83	8.74	75.0759	73.746	73.7561	2.61324	3.00677	2.82423	2.83696	2.36716	2.20622	15.05	15.7517	13.45	69.1583	66.3442	63.2983	4.47592	5.63744	5.58844
749	low	1	2010-08-26	2010	7	7	1952.3	3.29055	3.39376	17.7305	1	2.8537	1	9.31	9.83	8.74	75.0759	73.746	73.7561	2.61324	3.00677	2.82423	2.83696	2.36716	2.20622	15.05	15.7517	13.45	69.1583	66.3442	63.2983	4.47592	5.63744	5.58844
750	low	1	2010-09-28	2010	7	7	1952.3	3.29055	3.39376	17.7305	0	2.83315	1	9.31	9.83	8.74	75.0759	73.746	73.7561	2.61324	3.00677	2.82423	2.83696	2.36716	2.20622	15.05	15.7517	13.45	69.1583	66.3442	63.2983	4.47592	5.63744	5.58844
751	low	1	2010-09-28	2010	7	7	1952.3	3.29055	3.39376	17.7305	0	2.83315	1	9.31	9.83	8.74	75.0759	73.746	73.7561	2.61324	3.00677	2.82423	2.83696	2.36716	2.20622	15.05	15.7517	13.45	69.1583	66.3442	63.2983	4.47592	5.63744	5.58844
752	low	1	2010-09-28	2010	7	7	1952.3	3.29055	3.39376	17.7305	0	2.83315	1	9.31	9.83	8.74	75.0759	73.746	73.7561	2.61324	3.00677	2.82423	2.83696	2.36716	2.20622	15.05	15.7517	13.45	69.1583	66.3442	63.2983	4.47592	5.63744	5.58844
753	low	1	2010-09-28	2010	7	7	1952.3	3.29055	3.39376	17.7305	0	2.83315	1	9.31	9.83	8.74	75.0759	73.746	73.7561	2.61324	3.00677	2.82423	2.83696	2.36716	2.20622	15.05	15.7517	13.45	69.1583	66.3442	63.2983	4.47592	5.63744	5.58844
754	low	1	2010-09-28	2010	7	7	1952.3	3.29055	3.39376	17.7305	1	2.83315	1	9.31	9.83	8.74	75.0759	73.746	73.7561	2.61324	3.00677	2.82423	2.83696	2.36716	2.20622	15.05	15.7517	13.45	69.1583	66.3442	63.2983	4.47592	5.63744	5.58844
755	low	1	2010-09-28	2010	7	7	1952.3	3.29055	3.39376	17.7305	0	2.83315	1	9.31	9.83	8.74	75.0759	73.746	73.7561	2.61324	3.00677	2.82423	2.83696	2.36716	2.20622	15.05	15.7517	13.45	69.1583	66.3442	63.2983	4.47592	5.63744	5.58844
756	low	1	2010-09-28	2010	7	7	1952.3	3.29055	3.39376	17.7305	0	2.83315	1	9.31	9.83	8.74	75.0759	73.746	73.7561	2.61324	3.00677	2.82423	2.83696	2.36716	2.20622	15.05	15.7517	13.45	69.1583	66.3442	63.2983	4.47592	5.63744	5.58844
757	low	1	2010-09-28	2010	7	7	1952.3	3.29055	3.39376	17.7305	0	2.83315	1	9.31	9.83	8.74	75.0759	73.746	73.7561	2.61324	3.00677	2.82423	2.83696	2.36716	2.20622	15.05	15.7517	13.45	69.1583	66.3442	63.2983	4.47592	5.63744	5.58844
758	low	1	2010-09-28	2010	7	7	1952.3	3.29055	3.39376	17.7305	0	2.83315	1	9.31	9.83	8.74	75.0759	73.746	73.7561	2.61324	3.00677	2.82423	2.83696	2.36716	2.20622	15.05	15.7517	13.45	69.1583	66.3442	63.2983	4.47592	5.63744	5.58844
759	low	1	2010-09-28	2010	7	7	1952.3	3.29055	3.39376	17.7305	0	2.83315	1	9.31	9.83	8.74	75.0759	73.746	73.7561	2.61324	3.00677	2.82423	2.83696	2.36716	2.20622	15.05	15.7517	13.45	69.1583	66.3442	63.2983	4.47592	5.63744	5.58844
760	low	1	2010-09-28	2010	7	7	1952.3	3.29055	3.39376	17.7305	1	2.83315	1	9.31	9.83	8.74	75.0759	73.746	73.7561	2.61324	3.00677	2.82423	2.83696	2.36716	2.20622	15.05	15.7517	13.45	69.1583	66.3442	63.2983	4.47592	5.63744	5.58844
761	low	1	2010-09-28	2010	7	7	1952.3	3.29055	3.39376	17.7305	0	2.83315	1	9.31	9.83	8.74	75.0759	73.746	73.7561	2.61324	3.00677	2.82423	2.83696	2.36716	2.20622	15.05	15.7517	13.45	69.1583	66.3442	63.2983	4.47592	5.63744	5.58844
762	low	1	2010-09-28	2010	7	7	1952.3	3.29055	3.39376	17.7305	1	2.83315	1	9.31	9.83	8.74	75.0759	73.746	73.7561	2.61324	3.00677	2.82423	2.83696	2.36716	2.20622	15.05	15.7517	13.45	69.1583	66.3442	63.2983	4.47592	5.63744	5.58844
763	low	1	2010-09-28	2010	7	7	1952.3	3.29055	3.39376	17.7305	1	2.83315	1	9.31	9.83	8.74	75.0759	73.746	73.7561	2.61324	3.00677	2.82423	2.83696	2.36716	2.20622	15.05	15.7517	13.45	69.1583	66.3442	63.2983	4.47592	5.63744	5.58844
764	low	1	2010-09-28	2010	7	7	1952.3	3.29055	3.39376	17.7305	0	2.83315	1	9.31	9.83	8.74	75.0759	73.746	73.7561	2.61324	3.00677	2.82423	2.83696	2.36716	2.20622	15.05	15.7517	13.45	69.1583	66.3442	63.2983	4.47592	5.63744	5.58844
765	low	1	2010-09-28	2010	7	7	1952.3	3.29055	3.39376	17.7305	0	2.83315	1	9.31	9.83	8.74	75.0759	73.746	73.7561	2.61324	3.00677	2.82423	2.83696	2.36716	2.20622	15.05	15.7517	13.45	69.1583	66.3442	63.2983	4.47592	5.63744	5.58844
766	low	1	2010-09-28	2010	7	7	1952.3	3.29055	3.39376	17.7305	1	2.83315	1	9.31	9.83	8.74	75.0759	73.746	73.7561	2.61324	3.00677	2.82423	2.83696	2.36716	2.20622	15.05	15.7517	13.45	69.1583	66.3442	63.2983	4.47592	5.63744	5.58844
767	low	1	2010-09-28	2010	7	7	1952.3	3.29055	3.39376	17.7305	0	2.83315	1	9.31	9.83	8.74	75.0759	73.746	73.7561	2.61324	3.00677	2.82423	2.83696	2.36716	2.20622	15.05	15.7517	13.45	69.1583	66.3442	63.2983	4.47592	5.63744	5.58844
768	low	1	2010-09-28	2010	7	7	1952.3	3.29055	3.39376	17.7305	0	2.83315	1	9.31	9.83	8.74	75.0759	73.746	73.7561	2.61324	3.00677	2.82423	2.83696	2.36716	2.20622	15.05	15.7517	13.45	69.1583	66.3442	63.2983	4.47592	5.63744	5.58844
769	low	1	2010-09-28	2010	7	7	1952.3	3.29055	3.39376	17.7305	0	2.83315	1	9.31	9.83	8.74	75.0759	73.746	73.7561	2.61324	3.00677	2.82423	2.83696	2.36716	2.20622	15.05	15.7517	13.45	69.1583	66.3442	63.2983	4.47592	5.63744	5.58844
770	low	1	2010-10-28	2010	7	7	1952.3	3.29055	3.39376	17.7305	1	2.81291	1	9.31	9.83	8.74	75.0759	73.746	73.7561	2.61324	3.00677	2.82423	2.83696	2.36716	2.20622	15.05	15.7517	13.45	69.1583	66.3442	63.2983	4.47592	5.63744	5.58844
771	low	1	2010-10-28	2010	7	7	1952.3	3.29055	3.39376	17.7305	1	2.81291	1	9.31	9.83	8.74	75.0759	73.746	73.7561	2.61324	3.00677	2.82423	2.83696	2.36716	2.20622	15.05	15.7517	13.45	69.1583	66.3442	63.2983	4.47592	5.63744	5.58844
772	low	1	2010-10-28	2010	7	7	1952.3	3.29055	3.39376	17.7305	0	2.81291	1	9.31	9.83	8.74	75.0759	73.746	73.7561	2.61324	3.00677	2.82423	2.83696	2.36716	2.20622	15.05	15.7517	13.45	69.1583	66.3442	63.2983	4.47592	5.63744	5.58844
773	low	1	2010-10-28	2010	7	7	1952.3	3.29055	3.39376	17.7305	0	2.81291	1	9.31	9.83	8.74	75.0759	73.746	73.7561	2.61324	3.00677	2.82423	2.83696	2.36716	2.20622	15.05	15.7517	13.45	69.1583	66.3442	63.2983	4.47592	5.63744	5.58844
774	low	1	2010-10-28	2010	7	7	1952.3	3.29055	3.39376	17.7305	0	2.81291	1	9.31	9.83	8.74	75.0759	73.746	73.7561	2.61324	3.00677	2.82423	2.83696	2.36716	2.20622	15.05	15.7517	13.45	69.1583	66.3442	63.2983	4.47592	5.63744	5.58844
775	low	1	2010-10-28	2010	7	7	1952.3	3.29055	3.39376	17.7305	0	2.81291	1	9.31	9.83	8.74	75.0759	73.746	73.7561	2.61324	3.00677	2.82423	2.83696	2.36716	2.20622	15.05	15.7517	13.45	69.1583	66.3442	63.2983	4.47592	5.63744	5.58844
776	low	1	2010-10-28	2010	7	7	1952.3	3.29055	3.39376	17.7305	0	2.81291	1	9.31	9.83	8.74	75.0759	73.746	73.7561	2.61324	3.00677	2.82423	2.83696	2.36716	2.20622	15.05	15.7517	13.45	69.1583	66.3442	63.2983	4.47592	5.63744	5.58844
777	low	1	2010-10-28	2010	7	7	1952.3	3.29055	3.39376	17.7305	0	2.81291	1	9.31	9.83	8.74	75.0759	73.746	73.7561	2.61324	3.00677	2.82423	2.83696	2.36716	2.20622	15.05	15.7517	13.45	69.1583	66.3442	63.2983	4.47592	5.63744	5.58844
778	low	1	2010-10-28	2010	7	7	1952.3	3.29055	3.39376	17.7305	0	2.81291	1	9.31	9.83	8.74	75.0759	73.746	73.7561	2.61324	3.00677	2.82423	2.83696	2.36716	2.20622	15.05	15.7517	13.45	69.1583	66.3442	63.2983	4.47592	5.63744	5.58844
779	low	1	2010-10-28	2010	7	7	1952.3	3.29055	3.39376	17.7305	0	2.81291	1	9.31	9.83	8.74	75.0759	73.746	73.7561	2.61324	3.00677	2.82423	2.83696	2.36716	2.20622	15.05	15.7517	13.45	69.1583	66.3442	63.2983	4.47592	5.63744	5.58844
780	low	1	2010-10-28	2010	7	7	1952.3	3.29055	3.39376	17.7305	1	2.81291	1	9.31	9.83	8.74	75.0759	73.746	73.7561	2.61324	3.00677	2.82423	2.83696	2.36716	2.20622	15.05	15.7517	13.45	69.1583	66.3442	63.2983	4.47592	5.63744	5.58844
781	low	1	2010-10-28	2010	7	7	1952.3	3.29055	3.39376	17.7305	1	2.81291	1	9.31	9.83	8.74	75.0759	73.746	73.7561	2.61324	3.00677	2.82423	2.83696	2.36716	2.20622	15.05	15.7517	13.45	69.1583	66.3442	63.2983	4.47592	5.63744	5.58844
782	low	1	2010-10-28	2010	7	7	1952.3	3.29055	3.39376	17.7305	1	2.81291	1	9.31	9.83	8.74	75.0759	73.746	73.7561	2.61324	3.00677	2.82423	2.83696	2.36716	2.20622	15.05	15.7517	13.45	69.1583	66.3442	63.2983	4.47592	5.63744	5.58844
783	low	1	2010-10-28	2010	7	7	1952.3	3.29055	3.39376	17.7305	0	2.81291	1	9.31	9.83	8.74	75.0759	73.746	73.7561	2.61324	3.00677	2.82423	2.83696	2.36716	2.20622	15.05	15.7517	13.45	69.1583	66.3442	63.2983	4.47592	5.63744	5.58844
784	low	1	2010-10-28	2010	7	7	1952.3	3.29055	3.39376	17.7305	0	2.81291	1	9.31	9.83	8.74	75.0759	73.746	73.7561	2.61324	3.00677	2.82423	2.83696	2.36716	2.20622	15.05	15.7517	13.45	69.1583	66.3442	63.2983	4.47592	5.63744	5.58844
785	low	1	2010-10-28	2010	7	7	1952.3	3.29055	3.39376	17.7305	0	2.81291	1	9.31	9.83	8.74	75.0759	73.746	73.7561	2.61324	3.00677	2.82423	2.83696	2.36716	2.20622	15.05	15.7517	13.45	69.1583	66.3442	63.2983	4.47592	5.63744	5.58844
786	low	1	2010-10-28	2010	7	7	1952.3	3.29055	3.39376	17.7305	0	2.81291	1	9.31	9.83	8.74	75.0759	73.746	73.7561	2.61324	3.00677	2.82423	2.83696	2.36716	2.20622	15.05	15.7517	13.45	69.1583	66.3442	63.2983	4.47592	5.63744	5.58844
787	low	1	2010-10-28	2010	7	7	1952.3	3.29055	3.39376	17.7305	0	2.81291	1	9.31	9.83	8.74	75.0759	73.746	73.7561	2.61324	3.00677	2.82423	2.83696	2.36716	2.20622	15.05	15.7517	13.45	69.1583	66.3442	63.2983	4.47592	5.63744	5.58844
788	low	1	2010-10-28	2010	7	7	1952.3	3.29055	3.39376	17.7305	0	2.81291	1	9.31	9.83	8.74	75.0759	73.746	73.7561	2.61324	3.00677	2.82423	2.83696	2.36716	2.20622	15.05	15.7517	13.45	69.1583	66.3442	63.2983	4.47592	5.63744	5.58844
789	low	1	2010-10-28	2010	7	7	1952.3	3.29055	3.39376	17.7305	1	2.81291	1	9.31	9.83	8.74	75.0759	73.746	73.7561	2.61324	3.00677	2.82423	2.83696	2.36716	2.20622	15.05	15.7517	13.45	69.1583	66.3442	63.2983	4.47592	5.63744	5.58844
790	low	1	2011-01-17	2011	8	8	4491.02	3.65235	3.29055	18.8976	0	2.79518	5	9.83	8.74	10.42	73.746	73.7561	73.5716	3.00677	2.82423	3.0305	2.36716	2.20622	2.15895	15.7517	13.45	16.0833	66.3442	63.2983	70.6833	5.63744	5.58844	5.77977
791	low	1	2011-02-18	2011	8	8	4491.02	3.65235	3.29055	18.8976	0	2.77232	5	9.83	8.74	10.42	73.746	73.7561	73.5716	3.00677	2.82423	3.0305	2.36716	2.20622	2.15895	15.7517	13.45	16.0833	66.3442	63.2983	70.6833	5.63744	5.58844	5.77977
792	low	1	2011-02-18	2011	8	8	4491.02	3.65235	3.29055	18.8976	0	2.77232	5	9.83	8.74	10.42	73.746	73.7561	73.5716	3.00677	2.82423	3.0305	2.36716	2.20622	2.15895	15.7517	13.45	16.0833	66.3442	63.2983	70.6833	5.63744	5.58844	5.77977
793	low	1	2011-02-18	2011	8	8	4491.02	3.65235	3.29055	18.8976	0	2.77232	5	9.83	8.74	10.42	73.746	73.7561	73.5716	3.00677	2.82423	3.0305	2.36716	2.20622	2.15895	15.7517	13.45	16.0833	66.3442	63.2983	70.6833	5.63744	5.58844	5.77977
794	low	1	2011-02-18	2011	8	8	4491.02	3.65235	3.29055	18.8976	0	2.77232	5	9.83	8.74	10.42	73.746	73.7561	73.5716	3.00677	2.82423	3.0305	2.36716	2.20622	2.15895	15.7517	13.45	16.0833	66.3442	63.2983	70.6833	5.63744	5.58844	5.77977
795	low	1	2011-02-18	2011	8	8	4491.02	3.65235	3.29055	18.8976	0	2.77232	5	9.83	8.74	10.42	73.746	73.7561	73.5716	3.00677	2.82423	3.0305	2.36716	2.20622	2.15895	15.7517	13.45	16.0833	66.3442	63.2983	70.6833	5.63744	5.58844	5.77977
796	low	1	2011-02-18	2011	8	8	4491.02	3.65235	3.29055	18.8976	0	2.77232	5	9.83	8.74	10.42	73.746	73.7561	73.5716	3.00677	2.82423	3.0305	2.36716	2.20622	2.15895	15.7517	13.45	16.0833	66.3442	63.2983	70.6833	5.63744	5.58844	5.77977
797	low	1	2011-02-18	2011	8	8	4491.02	3.65235	3.29055	18.8976	0	2.77232	5	9.83	8.74	10.42	73.746	73.7561	73.5716	3.00677	2.82423	3.0305	2.36716	2.20622	2.15895	15.7517	13.45	16.0833	66.3442	63.2983	70.6833	5.63744	5.58844	5.77977
798	low	1	2011-02-18	2011	8	8	4491.02	3.65235	3.29055	18.8976	0	2.77232	5	9.83	8.74	10.42	73.746	73.7561	73.5716	3.00677	2.82423	3.0305	2.36716	2.20622	2.15895	15.7517	13.45	16.0833	66.3442	63.2983	70.6833	5.63744	5.58844	5.77977
799	low	1	2011-02-18	2011	8	8	4491.02	3.65235	3.29055	18.8976	1	2.77232	5	9.83	8.74	10.42	73.746	73.7561	73.5716	3.00677	2.82423	3.0305	2.36716	2.20622	2.15895	15.7517	13.45	16.0833	66.3442	63.2983	70.6833	5.63744	5.58844	5.77977
800	low	1	2011-02-18	2011	8	8	4491.02	3.65235	3.29055	18.8976	0	2.77232	5	9.83	8.74	10.42	73.746	73.7561	73.5716	3.00677	2.82423	3.0305	2.36716	2.20622	2.15895	15.7517	13.45	16.0833	66.3442	63.2983	70.6833	5.63744	5.58844	5.77977
801	low	1	2011-02-18	2011	8	8	4491.02	3.65235	3.29055	18.8976	0	2.77232	5	9.83	8.74	10.42	73.746	73.7561	73.5716	3.00677	2.82423	3.0305	2.36716	2.20622	2.15895	15.7517	13.45	16.0833	66.3442	63.2983	70.6833	5.63744	5.58844	5.77977
802	low	1	2011-02-18	2011	8	8	4491.02	3.65235	3.29055	18.8976	0	2.77232	5	9.83	8.74	10.42	73.746	73.7561	73.5716	3.00677	2.82423	3.0305	2.36716	2.20622	2.15895	15.7517	13.45	16.0833	66.3442	63.2983	70.6833	5.63744	5.58844	5.77977
803	low	1	2011-02-18	2011	8	8	4491.02	3.65235	3.29055	18.8976	0	2.77232	5	9.83	8.74	10.42	73.746	73.7561	73.5716	3.00677	2.82423	3.0305	2.36716	2.20622	2.15895	15.7517	13.45	16.0833	66.3442	63.2983	70.6833	5.63744	5.58844	5.77977
804	low	1	2011-02-18	2011	8	8	4491.02	3.65235	3.29055	18.8976	0	2.77232	5	9.83	8.74	10.42	73.746	73.7561	73.5716	3.00677	2.82423	3.0305	2.36716	2.20622	2.15895	15.7517	13.45	16.0833	66.3442	63.2983	70.6833	5.63744	5.58844	5.77977
805	low	1	2011-02-18	2011	8	8	4491.02	3.65235	3.29055	18.8976	0	2.77232	5	9.83	8.74	10.42	73.746	73.7561	73.5716	3.00677	2.82423	3.0305	2.36716	2.20622	2.15895	15.7517	13.45	16.0833	66.3442	63.2983	70.6833	5.63744	5.58844	5.77977
806	low	1	2011-02-18	2011	8	8	4491.02	3.65235	3.29055	18.8976	0	2.77232	5	9.83	8.74	10.42	73.746	73.7561	73.5716	3.00677	2.82423	3.0305	2.36716	2.20622	2.15895	15.7517	13.45	16.0833	66.3442	63.2983	70.6833	5.63744	5.58844	5.77977
807	low	1	2011-02-18	2011	8	8	4491.02	3.65235	3.29055	18.8976	1	2.77232	5	9.83	8.74	10.42	73.746	73.7561	73.5716	3.00677	2.82423	3.0305	2.36716	2.20622	2.15895	15.7517	13.45	16.0833	66.3442	63.2983	70.6833	5.63744	5.58844	5.77977
808	low	1	2011-02-18	2011	8	8	4491.02	3.65235	3.29055	18.8976	0	2.77232	5	9.83	8.74	10.42	73.746	73.7561	73.5716	3.00677	2.82423	3.0305	2.36716	2.20622	2.15895	15.7517	13.45	16.0833	66.3442	63.2983	70.6833	5.63744	5.58844	5.77977
809	low	1	2011-02-18	2011	8	8	4491.02	3.65235	3.29055	18.8976	0	2.77232	5	9.83	8.74	10.42	73.746	73.7561	73.5716	3.00677	2.82423	3.0305	2.36716	2.20622	2.15895	15.7517	13.45	16.0833	66.3442	63.2983	70.6833	5.63744	5.58844	5.77977
810	low	1	2011-02-18	2011	8	8	4491.02	3.65235	3.29055	18.8976	0	2.77232	5	9.83	8.74	10.42	73.746	73.7561	73.5716	3.00677	2.82423	3.0305	2.36716	2.20622	2.15895	15.7517	13.45	16.0833	66.3442	63.2983	70.6833	5.63744	5.58844	5.77977
811	low	1	2011-03-29	2011	8	8	4491.02	3.65235	3.29055	18.8976	0	2.74194	5	9.83	8.74	10.42	73.746	73.7561	73.5716	3.00677	2.82423	3.0305	2.36716	2.20622	2.15895	15.7517	13.45	16.0833	66.3442	63.2983	70.6833	5.63744	5.58844	5.77977
812	low	1	2011-03-29	2011	8	8	4491.02	3.65235	3.29055	18.8976	0	2.74194	5	9.83	8.74	10.42	73.746	73.7561	73.5716	3.00677	2.82423	3.0305	2.36716	2.20622	2.15895	15.7517	13.45	16.0833	66.3442	63.2983	70.6833	5.63744	5.58844	5.77977
813	low	1	2011-03-29	2011	8	8	4491.02	3.65235	3.29055	18.8976	1	2.74194	5	9.83	8.74	10.42	73.746	73.7561	73.5716	3.00677	2.82423	3.0305	2.36716	2.20622	2.15895	15.7517	13.45	16.0833	66.3442	63.2983	70.6833	5.63744	5.58844	5.77977
814	low	1	2011-03-29	2011	8	8	4491.02	3.65235	3.29055	18.8976	0	2.74194	5	9.83	8.74	10.42	73.746	73.7561	73.5716	3.00677	2.82423	3.0305	2.36716	2.20622	2.15895	15.7517	13.45	16.0833	66.3442	63.2983	70.6833	5.63744	5.58844	5.77977
815	low	1	2011-03-29	2011	8	8	4491.02	3.65235	3.29055	18.8976	0	2.74194	5	9.83	8.74	10.42	73.746	73.7561	73.5716	3.00677	2.82423	3.0305	2.36716	2.20622	2.15895	15.7517	13.45	16.0833	66.3442	63.2983	70.6833	5.63744	5.58844	5.77977
816	low	1	2011-03-29	2011	8	8	4491.02	3.65235	3.29055	18.8976	0	2.74194	5	9.83	8.74	10.42	73.746	73.7561	73.5716	3.00677	2.82423	3.0305	2.36716	2.20622	2.15895	15.7517	13.45	16.0833	66.3442	63.2983	70.6833	5.63744	5.58844	5.77977
817	low	1	2011-03-29	2011	8	8	4491.02	3.65235	3.29055	18.8976	0	2.74194	5	9.83	8.74	10.42	73.746	73.7561	73.5716	3.00677	2.82423	3.0305	2.36716	2.20622	2.15895	15.7517	13.45	16.0833	66.3442	63.2983	70.6833	5.63744	5.58844	5.77977
818	low	1	2011-03-29	2011	8	8	4491.02	3.65235	3.29055	18.8976	0	2.74194	5	9.83	8.74	10.42	73.746	73.7561	73.5716	3.00677	2.82423	3.0305	2.36716	2.20622	2.15895	15.7517	13.45	16.0833	66.3442	63.2983	70.6833	5.63744	5.58844	5.77977
819	low	1	2011-03-29	2011	8	8	4491.02	3.65235	3.29055	18.8976	1	2.74194	5	9.83	8.74	10.42	73.746	73.7561	73.5716	3.00677	2.82423	3.0305	2.36716	2.20622	2.15895	15.7517	13.45	16.0833	66.3442	63.2983	70.6833	5.63744	5.58844	5.77977
820	low	1	2011-03-29	2011	8	8	4491.02	3.65235	3.29055	18.8976	0	2.74194	5	9.83	8.74	10.42	73.746	73.7561	73.5716	3.00677	2.82423	3.0305	2.36716	2.20622	2.15895	15.7517	13.45	16.0833	66.3442	63.2983	70.6833	5.63744	5.58844	5.77977
821	low	1	2011-03-29	2011	8	8	4491.02	3.65235	3.29055	18.8976	1	2.74194	5	9.83	8.74	10.42	73.746	73.7561	73.5716	3.00677	2.82423	3.0305	2.36716	2.20622	2.15895	15.7517	13.45	16.0833	66.3442	63.2983	70.6833	5.63744	5.58844	5.77977
822	low	1	2011-03-29	2011	8	8	4491.02	3.65235	3.29055	18.8976	0	2.74194	5	9.83	8.74	10.42	73.746	73.7561	73.5716	3.00677	2.82423	3.0305	2.36716	2.20622	2.15895	15.7517	13.45	16.0833	66.3442	63.2983	70.6833	5.63744	5.58844	5.77977
823	low	1	2011-03-29	2011	8	8	4491.02	3.65235	3.29055	18.8976	0	2.74194	5	9.83	8.74	10.42	73.746	73.7561	73.5716	3.00677	2.82423	3.0305	2.36716	2.20622	2.15895	15.7517	13.45	16.0833	66.3442	63.2983	70.6833	5.63744	5.58844	5.77977
824	low	1	2011-03-29	2011	8	8	4491.02	3.65235	3.29055	18.8976	1	2.74194	5	9.83	8.74	10.42	73.746	73.7561	73.5716	3.00677	2.82423	3.0305	2.36716	2.20622	2.15895	15.7517	13.45	16.0833	66.3442	63.2983	70.6833	5.63744	5.58844	5.77977
825	low	1	2011-03-29	2011	8	8	4491.02	3.65235	3.29055	18.8976	0	2.74194	5	9.83	8.74	10.42	73.746	73.7561	73.5716	3.00677	2.82423	3.0305	2.36716	2.20622	2.15895	15.7517	13.45	16.0833	66.3442	63.2983	70.6833	5.63744	5.58844	5.77977
826	low	1	2011-03-29	2011	8	8	4491.02	3.65235	3.29055	18.8976	0	2.74194	5	9.83	8.74	10.42	73.746	73.7561	73.5716	3.00677	2.82423	3.0305	2.36716	2.20622	2.15895	15.7517	13.45	16.0833	66.3442	63.2983	70.6833	5.63744	5.58844	5.77977
827	low	1	2011-03-29	2011	8	8	4491.02	3.65235	3.29055	18.8976	0	2.74194	5	9.83	8.74	10.42	73.746	73.7561	73.5716	3.00677	2.82423	3.0305	2.36716	2.20622	2.15895	15.7517	13.45	16.0833	66.3442	63.2983	70.6833	5.63744	5.58844	5.77977
828	low	1	2011-03-29	2011	8	8	4491.02	3.65235	3.29055	18.8976	0	2.74194	5	9.83	8.74	10.42	73.746	73.7561	73.5716	3.00677	2.82423	3.0305	2.36716	2.20622	2.15895	15.7517	13.45	16.0833	66.3442	63.2983	70.6833	5.63744	5.58844	5.77977
829	low	1	2011-03-29	2011	8	8	4491.02	3.65235	3.29055	18.8976	0	2.74194	5	9.83	8.74	10.42	73.746	73.7561	73.5716	3.00677	2.82423	3.0305	2.36716	2.20622	2.15895	15.7517	13.45	16.0833	66.3442	63.2983	70.6833	5.63744	5.58844	5.77977
830	low	1	2011-03-29	2011	8	8	4491.02	3.65235	3.29055	18.8976	0	2.74194	5	9.83	8.74	10.42	73.746	73.7561	73.5716	3.00677	2.82423	3.0305	2.36716	2.20622	2.15895	15.7517	13.45	16.0833	66.3442	63.2983	70.6833	5.63744	5.58844	5.77977
831	low	1	2011-03-29	2011	8	8	4491.02	3.65235	3.29055	18.8976	0	2.74273	5	9.83	8.74	10.42	73.746	73.7561	73.5716	3.00677	2.82423	3.0305	2.36716	2.20622	2.15895	15.7517	13.45	16.0833	66.3442	63.2983	70.6833	5.63744	5.58844	5.77977
832	low	1	2011-03-29	2011	8	8	4491.02	3.65235	3.29055	18.8976	0	2.74273	5	9.83	8.74	10.42	73.746	73.7561	73.5716	3.00677	2.82423	3.0305	2.36716	2.20622	2.15895	15.7517	13.45	16.0833	66.3442	63.2983	70.6833	5.63744	5.58844	5.77977
833	low	1	2011-03-29	2011	8	8	4491.02	3.65235	3.29055	18.8976	0	2.74273	5	9.83	8.74	10.42	73.746	73.7561	73.5716	3.00677	2.82423	3.0305	2.36716	2.20622	2.15895	15.7517	13.45	16.0833	66.3442	63.2983	70.6833	5.63744	5.58844	5.77977
834	low	1	2011-03-29	2011	8	8	4491.02	3.65235	3.29055	18.8976	0	2.74273	5	9.83	8.74	10.42	73.746	73.7561	73.5716	3.00677	2.82423	3.0305	2.36716	2.20622	2.15895	15.7517	13.45	16.0833	66.3442	63.2983	70.6833	5.63744	5.58844	5.77977
835	low	1	2011-03-29	2011	8	8	4491.02	3.65235	3.29055	18.8976	0	2.74273	5	9.83	8.74	10.42	73.746	73.7561	73.5716	3.00677	2.82423	3.0305	2.36716	2.20622	2.15895	15.7517	13.45	16.0833	66.3442	63.2983	70.6833	5.63744	5.58844	5.77977
836	low	1	2011-03-29	2011	8	8	4491.02	3.65235	3.29055	18.8976	0	2.74273	5	9.83	8.74	10.42	73.746	73.7561	73.5716	3.00677	2.82423	3.0305	2.36716	2.20622	2.15895	15.7517	13.45	16.0833	66.3442	63.2983	70.6833	5.63744	5.58844	5.77977
837	low	1	2011-04-20	2011	8	8	4491.02	3.65235	3.29055	18.8976	0	2.72099	5	9.83	8.74	10.42	73.746	73.7561	73.5716	3.00677	2.82423	3.0305	2.36716	2.20622	2.15895	15.7517	13.45	16.0833	66.3442	63.2983	70.6833	5.63744	5.58844	5.77977
838	low	1	2011-04-20	2011	8	8	4491.02	3.65235	3.29055	18.8976	0	2.72099	5	9.83	8.74	10.42	73.746	73.7561	73.5716	3.00677	2.82423	3.0305	2.36716	2.20622	2.15895	15.7517	13.45	16.0833	66.3442	63.2983	70.6833	5.63744	5.58844	5.77977
839	low	1	2011-04-20	2011	8	8	4491.02	3.65235	3.29055	18.8976	1	2.72099	5	9.83	8.74	10.42	73.746	73.7561	73.5716	3.00677	2.82423	3.0305	2.36716	2.20622	2.15895	15.7517	13.45	16.0833	66.3442	63.2983	70.6833	5.63744	5.58844	5.77977
840	low	1	2011-04-20	2011	8	8	4491.02	3.65235	3.29055	18.8976	0	2.72099	5	9.83	8.74	10.42	73.746	73.7561	73.5716	3.00677	2.82423	3.0305	2.36716	2.20622	2.15895	15.7517	13.45	16.0833	66.3442	63.2983	70.6833	5.63744	5.58844	5.77977
841	low	1	2011-04-20	2011	8	8	4491.02	3.65235	3.29055	18.8976	1	2.72099	5	9.83	8.74	10.42	73.746	73.7561	73.5716	3.00677	2.82423	3.0305	2.36716	2.20622	2.15895	15.7517	13.45	16.0833	66.3442	63.2983	70.6833	5.63744	5.58844	5.77977
842	low	1	2011-04-20	2011	8	8	4491.02	3.65235	3.29055	18.8976	0	2.72099	5	9.83	8.74	10.42	73.746	73.7561	73.5716	3.00677	2.82423	3.0305	2.36716	2.20622	2.15895	15.7517	13.45	16.0833	66.3442	63.2983	70.6833	5.63744	5.58844	5.77977
843	low	1	2011-04-20	2011	8	8	4491.02	3.65235	3.29055	18.8976	0	2.72099	5	9.83	8.74	10.42	73.746	73.7561	73.5716	3.00677	2.82423	3.0305	2.36716	2.20622	2.15895	15.7517	13.45	16.0833	66.3442	63.2983	70.6833	5.63744	5.58844	5.77977
844	low	1	2011-04-20	2011	8	8	4491.02	3.65235	3.29055	18.8976	0	2.72099	5	9.83	8.74	10.42	73.746	73.7561	73.5716	3.00677	2.82423	3.0305	2.36716	2.20622	2.15895	15.7517	13.45	16.0833	66.3442	63.2983	70.6833	5.63744	5.58844	5.77977
845	low	1	2011-04-20	2011	8	8	4491.02	3.65235	3.29055	18.8976	0	2.72099	5	9.83	8.74	10.42	73.746	73.7561	73.5716	3.00677	2.82423	3.0305	2.36716	2.20622	2.15895	15.7517	13.45	16.0833	66.3442	63.2983	70.6833	5.63744	5.58844	5.77977
846	low	1	2011-04-20	2011	8	8	4491.02	3.65235	3.29055	18.8976	1	2.72099	5	9.83	8.74	10.42	73.746	73.7561	73.5716	3.00677	2.82423	3.0305	2.36716	2.20622	2.15895	15.7517	13.45	16.0833	66.3442	63.2983	70.6833	5.63744	5.58844	5.77977
847	low	1	2011-04-20	2011	8	8	4491.02	3.65235	3.29055	18.8976	1	2.72099	5	9.83	8.74	10.42	73.746	73.7561	73.5716	3.00677	2.82423	3.0305	2.36716	2.20622	2.15895	15.7517	13.45	16.0833	66.3442	63.2983	70.6833	5.63744	5.58844	5.77977
848	low	1	2011-04-20	2011	8	8	4491.02	3.65235	3.29055	18.8976	1	2.72099	5	9.83	8.74	10.42	73.746	73.7561	73.5716	3.00677	2.82423	3.0305	2.36716	2.20622	2.15895	15.7517	13.45	16.0833	66.3442	63.2983	70.6833	5.63744	5.58844	5.77977
849	low	1	2011-04-20	2011	8	8	4491.02	3.65235	3.29055	18.8976	0	2.72099	5	9.83	8.74	10.42	73.746	73.7561	73.5716	3.00677	2.82423	3.0305	2.36716	2.20622	2.15895	15.7517	13.45	16.0833	66.3442	63.2983	70.6833	5.63744	5.58844	5.77977
850	low	1	2011-04-20	2011	8	8	4491.02	3.65235	3.29055	18.8976	0	2.72099	5	9.83	8.74	10.42	73.746	73.7561	73.5716	3.00677	2.82423	3.0305	2.36716	2.20622	2.15895	15.7517	13.45	16.0833	66.3442	63.2983	70.6833	5.63744	5.58844	5.77977
851	low	1	2011-04-20	2011	8	8	4491.02	3.65235	3.29055	18.8976	0	2.72099	5	9.83	8.74	10.42	73.746	73.7561	73.5716	3.00677	2.82423	3.0305	2.36716	2.20622	2.15895	15.7517	13.45	16.0833	66.3442	63.2983	70.6833	5.63744	5.58844	5.77977
852	low	1	2011-04-20	2011	8	8	4491.02	3.65235	3.29055	18.8976	1	2.72099	5	9.83	8.74	10.42	73.746	73.7561	73.5716	3.00677	2.82423	3.0305	2.36716	2.20622	2.15895	15.7517	13.45	16.0833	66.3442	63.2983	70.6833	5.63744	5.58844	5.77977
853	low	1	2011-04-20	2011	8	8	4491.02	3.65235	3.29055	18.8976	0	2.72099	5	9.83	8.74	10.42	73.746	73.7561	73.5716	3.00677	2.82423	3.0305	2.36716	2.20622	2.15895	15.7517	13.45	16.0833	66.3442	63.2983	70.6833	5.63744	5.58844	5.77977
854	low	1	2011-04-20	2011	8	8	4491.02	3.65235	3.29055	18.8976	0	2.72099	5	9.83	8.74	10.42	73.746	73.7561	73.5716	3.00677	2.82423	3.0305	2.36716	2.20622	2.15895	15.7517	13.45	16.0833	66.3442	63.2983	70.6833	5.63744	5.58844	5.77977
855	low	1	2011-04-20	2011	8	8	4491.02	3.65235	3.29055	18.8976	0	2.72099	5	9.83	8.74	10.42	73.746	73.7561	73.5716	3.00677	2.82423	3.0305	2.36716	2.20622	2.15895	15.7517	13.45	16.0833	66.3442	63.2983	70.6833	5.63744	5.58844	5.77977
856	low	1	2011-04-20	2011	8	8	4491.02	3.65235	3.29055	18.8976	0	2.72099	5	9.83	8.74	10.42	73.746	73.7561	73.5716	3.00677	2.82423	3.0305	2.36716	2.20622	2.15895	15.7517	13.45	16.0833	66.3442	63.2983	70.6833	5.63744	5.58844	5.77977
857	low	1	2011-05-18	2011	8	8	4491.02	3.65235	3.29055	18.8976	0	2.70415	5	9.83	8.74	10.42	73.746	73.7561	73.5716	3.00677	2.82423	3.0305	2.36716	2.20622	2.15895	15.7517	13.45	16.0833	66.3442	63.2983	70.6833	5.63744	5.58844	5.77977
858	low	1	2011-05-18	2011	8	8	4491.02	3.65235	3.29055	18.8976	0	2.70415	5	9.83	8.74	10.42	73.746	73.7561	73.5716	3.00677	2.82423	3.0305	2.36716	2.20622	2.15895	15.7517	13.45	16.0833	66.3442	63.2983	70.6833	5.63744	5.58844	5.77977
859	low	1	2011-05-18	2011	8	8	4491.02	3.65235	3.29055	18.8976	0	2.70415	5	9.83	8.74	10.42	73.746	73.7561	73.5716	3.00677	2.82423	3.0305	2.36716	2.20622	2.15895	15.7517	13.45	16.0833	66.3442	63.2983	70.6833	5.63744	5.58844	5.77977
860	low	1	2011-05-18	2011	8	8	4491.02	3.65235	3.29055	18.8976	0	2.70415	5	9.83	8.74	10.42	73.746	73.7561	73.5716	3.00677	2.82423	3.0305	2.36716	2.20622	2.15895	15.7517	13.45	16.0833	66.3442	63.2983	70.6833	5.63744	5.58844	5.77977
861	low	1	2011-05-18	2011	8	8	4491.02	3.65235	3.29055	18.8976	0	2.70415	5	9.83	8.74	10.42	73.746	73.7561	73.5716	3.00677	2.82423	3.0305	2.36716	2.20622	2.15895	15.7517	13.45	16.0833	66.3442	63.2983	70.6833	5.63744	5.58844	5.77977
862	low	1	2011-05-18	2011	8	8	4491.02	3.65235	3.29055	18.8976	0	2.70415	5	9.83	8.74	10.42	73.746	73.7561	73.5716	3.00677	2.82423	3.0305	2.36716	2.20622	2.15895	15.7517	13.45	16.0833	66.3442	63.2983	70.6833	5.63744	5.58844	5.77977
863	low	1	2011-05-18	2011	8	8	4491.02	3.65235	3.29055	18.8976	0	2.70415	5	9.83	8.74	10.42	73.746	73.7561	73.5716	3.00677	2.82423	3.0305	2.36716	2.20622	2.15895	15.7517	13.45	16.0833	66.3442	63.2983	70.6833	5.63744	5.58844	5.77977
864	low	1	2011-05-18	2011	8	8	4491.02	3.65235	3.29055	18.8976	1	2.70415	5	9.83	8.74	10.42	73.746	73.7561	73.5716	3.00677	2.82423	3.0305	2.36716	2.20622	2.15895	15.7517	13.45	16.0833	66.3442	63.2983	70.6833	5.63744	5.58844	5.77977
865	low	1	2011-05-18	2011	8	8	4491.02	3.65235	3.29055	18.8976	1	2.70415	5	9.83	8.74	10.42	73.746	73.7561	73.5716	3.00677	2.82423	3.0305	2.36716	2.20622	2.15895	15.7517	13.45	16.0833	66.3442	63.2983	70.6833	5.63744	5.58844	5.77977
866	low	1	2011-05-18	2011	8	8	4491.02	3.65235	3.29055	18.8976	1	2.70415	5	9.83	8.74	10.42	73.746	73.7561	73.5716	3.00677	2.82423	3.0305	2.36716	2.20622	2.15895	15.7517	13.45	16.0833	66.3442	63.2983	70.6833	5.63744	5.58844	5.77977
867	low	1	2011-05-18	2011	8	8	4491.02	3.65235	3.29055	18.8976	0	2.70415	5	9.83	8.74	10.42	73.746	73.7561	73.5716	3.00677	2.82423	3.0305	2.36716	2.20622	2.15895	15.7517	13.45	16.0833	66.3442	63.2983	70.6833	5.63744	5.58844	5.77977
868	low	1	2011-05-18	2011	8	8	4491.02	3.65235	3.29055	18.8976	0	2.70415	5	9.83	8.74	10.42	73.746	73.7561	73.5716	3.00677	2.82423	3.0305	2.36716	2.20622	2.15895	15.7517	13.45	16.0833	66.3442	63.2983	70.6833	5.63744	5.58844	5.77977
869	low	1	2011-05-18	2011	8	8	4491.02	3.65235	3.29055	18.8976	0	2.70415	5	9.83	8.74	10.42	73.746	73.7561	73.5716	3.00677	2.82423	3.0305	2.36716	2.20622	2.15895	15.7517	13.45	16.0833	66.3442	63.2983	70.6833	5.63744	5.58844	5.77977
870	low	1	2011-05-18	2011	8	8	4491.02	3.65235	3.29055	18.8976	0	2.70415	5	9.83	8.74	10.42	73.746	73.7561	73.5716	3.00677	2.82423	3.0305	2.36716	2.20622	2.15895	15.7517	13.45	16.0833	66.3442	63.2983	70.6833	5.63744	5.58844	5.77977
871	low	1	2011-05-18	2011	8	8	4491.02	3.65235	3.29055	18.8976	0	2.70415	5	9.83	8.74	10.42	73.746	73.7561	73.5716	3.00677	2.82423	3.0305	2.36716	2.20622	2.15895	15.7517	13.45	16.0833	66.3442	63.2983	70.6833	5.63744	5.58844	5.77977
872	low	1	2011-05-18	2011	8	8	4491.02	3.65235	3.29055	18.8976	0	2.70415	5	9.83	8.74	10.42	73.746	73.7561	73.5716	3.00677	2.82423	3.0305	2.36716	2.20622	2.15895	15.7517	13.45	16.0833	66.3442	63.2983	70.6833	5.63744	5.58844	5.77977
873	low	1	2011-05-18	2011	8	8	4491.02	3.65235	3.29055	18.8976	0	2.70415	5	9.83	8.74	10.42	73.746	73.7561	73.5716	3.00677	2.82423	3.0305	2.36716	2.20622	2.15895	15.7517	13.45	16.0833	66.3442	63.2983	70.6833	5.63744	5.58844	5.77977
874	low	1	2011-05-18	2011	8	8	4491.02	3.65235	3.29055	18.8976	0	2.70415	5	9.83	8.74	10.42	73.746	73.7561	73.5716	3.00677	2.82423	3.0305	2.36716	2.20622	2.15895	15.7517	13.45	16.0833	66.3442	63.2983	70.6833	5.63744	5.58844	5.77977
875	low	1	2011-05-18	2011	8	8	4491.02	3.65235	3.29055	18.8976	1	2.70415	5	9.83	8.74	10.42	73.746	73.7561	73.5716	3.00677	2.82423	3.0305	2.36716	2.20622	2.15895	15.7517	13.45	16.0833	66.3442	63.2983	70.6833	5.63744	5.58844	5.77977
876	low	1	2011-05-18	2011	8	8	4491.02	3.65235	3.29055	18.8976	0	2.70415	5	9.83	8.74	10.42	73.746	73.7561	73.5716	3.00677	2.82423	3.0305	2.36716	2.20622	2.15895	15.7517	13.45	16.0833	66.3442	63.2983	70.6833	5.63744	5.58844	5.77977
877	low	1	2011-06-28	2011	8	8	4491.02	3.65235	3.29055	18.8976	1	2.67117	5	9.83	8.74	10.42	73.746	73.7561	73.5716	3.00677	2.82423	3.0305	2.36716	2.20622	2.15895	15.7517	13.45	16.0833	66.3442	63.2983	70.6833	5.63744	5.58844	5.77977
878	low	1	2011-06-28	2011	8	8	4491.02	3.65235	3.29055	18.8976	0	2.67117	5	9.83	8.74	10.42	73.746	73.7561	73.5716	3.00677	2.82423	3.0305	2.36716	2.20622	2.15895	15.7517	13.45	16.0833	66.3442	63.2983	70.6833	5.63744	5.58844	5.77977
879	low	1	2011-06-28	2011	8	8	4491.02	3.65235	3.29055	18.8976	0	2.67117	5	9.83	8.74	10.42	73.746	73.7561	73.5716	3.00677	2.82423	3.0305	2.36716	2.20622	2.15895	15.7517	13.45	16.0833	66.3442	63.2983	70.6833	5.63744	5.58844	5.77977
880	low	1	2011-06-28	2011	8	8	4491.02	3.65235	3.29055	18.8976	0	2.67117	5	9.83	8.74	10.42	73.746	73.7561	73.5716	3.00677	2.82423	3.0305	2.36716	2.20622	2.15895	15.7517	13.45	16.0833	66.3442	63.2983	70.6833	5.63744	5.58844	5.77977
881	low	1	2011-06-28	2011	8	8	4491.02	3.65235	3.29055	18.8976	1	2.67117	5	9.83	8.74	10.42	73.746	73.7561	73.5716	3.00677	2.82423	3.0305	2.36716	2.20622	2.15895	15.7517	13.45	16.0833	66.3442	63.2983	70.6833	5.63744	5.58844	5.77977
882	low	1	2011-06-28	2011	8	8	4491.02	3.65235	3.29055	18.8976	1	2.67117	5	9.83	8.74	10.42	73.746	73.7561	73.5716	3.00677	2.82423	3.0305	2.36716	2.20622	2.15895	15.7517	13.45	16.0833	66.3442	63.2983	70.6833	5.63744	5.58844	5.77977
883	low	1	2011-06-28	2011	8	8	4491.02	3.65235	3.29055	18.8976	0	2.67117	5	9.83	8.74	10.42	73.746	73.7561	73.5716	3.00677	2.82423	3.0305	2.36716	2.20622	2.15895	15.7517	13.45	16.0833	66.3442	63.2983	70.6833	5.63744	5.58844	5.77977
884	low	1	2011-06-28	2011	8	8	4491.02	3.65235	3.29055	18.8976	0	2.67117	5	9.83	8.74	10.42	73.746	73.7561	73.5716	3.00677	2.82423	3.0305	2.36716	2.20622	2.15895	15.7517	13.45	16.0833	66.3442	63.2983	70.6833	5.63744	5.58844	5.77977
885	low	1	2011-06-28	2011	8	8	4491.02	3.65235	3.29055	18.8976	0	2.67117	5	9.83	8.74	10.42	73.746	73.7561	73.5716	3.00677	2.82423	3.0305	2.36716	2.20622	2.15895	15.7517	13.45	16.0833	66.3442	63.2983	70.6833	5.63744	5.58844	5.77977
886	low	1	2011-06-28	2011	8	8	4491.02	3.65235	3.29055	18.8976	0	2.67117	5	9.83	8.74	10.42	73.746	73.7561	73.5716	3.00677	2.82423	3.0305	2.36716	2.20622	2.15895	15.7517	13.45	16.0833	66.3442	63.2983	70.6833	5.63744	5.58844	5.77977
887	low	1	2011-06-28	2011	8	8	4491.02	3.65235	3.29055	18.8976	0	2.67117	5	9.83	8.74	10.42	73.746	73.7561	73.5716	3.00677	2.82423	3.0305	2.36716	2.20622	2.15895	15.7517	13.45	16.0833	66.3442	63.2983	70.6833	5.63744	5.58844	5.77977
888	low	1	2011-06-28	2011	8	8	4491.02	3.65235	3.29055	18.8976	0	2.67117	5	9.83	8.74	10.42	73.746	73.7561	73.5716	3.00677	2.82423	3.0305	2.36716	2.20622	2.15895	15.7517	13.45	16.0833	66.3442	63.2983	70.6833	5.63744	5.58844	5.77977
889	low	1	2011-06-28	2011	8	8	4491.02	3.65235	3.29055	18.8976	1	2.67117	5	9.83	8.74	10.42	73.746	73.7561	73.5716	3.00677	2.82423	3.0305	2.36716	2.20622	2.15895	15.7517	13.45	16.0833	66.3442	63.2983	70.6833	5.63744	5.58844	5.77977
890	low	1	2011-06-28	2011	8	8	4491.02	3.65235	3.29055	18.8976	1	2.67117	5	9.83	8.74	10.42	73.746	73.7561	73.5716	3.00677	2.82423	3.0305	2.36716	2.20622	2.15895	15.7517	13.45	16.0833	66.3442	63.2983	70.6833	5.63744	5.58844	5.77977
891	low	1	2011-06-28	2011	8	8	4491.02	3.65235	3.29055	18.8976	0	2.67117	5	9.83	8.74	10.42	73.746	73.7561	73.5716	3.00677	2.82423	3.0305	2.36716	2.20622	2.15895	15.7517	13.45	16.0833	66.3442	63.2983	70.6833	5.63744	5.58844	5.77977
892	low	1	2011-06-28	2011	8	8	4491.02	3.65235	3.29055	18.8976	0	2.67117	5	9.83	8.74	10.42	73.746	73.7561	73.5716	3.00677	2.82423	3.0305	2.36716	2.20622	2.15895	15.7517	13.45	16.0833	66.3442	63.2983	70.6833	5.63744	5.58844	5.77977
893	low	1	2011-06-28	2011	8	8	4491.02	3.65235	3.29055	18.8976	0	2.67117	5	9.83	8.74	10.42	73.746	73.7561	73.5716	3.00677	2.82423	3.0305	2.36716	2.20622	2.15895	15.7517	13.45	16.0833	66.3442	63.2983	70.6833	5.63744	5.58844	5.77977
894	low	1	2011-06-28	2011	8	8	4491.02	3.65235	3.29055	18.8976	0	2.67117	5	9.83	8.74	10.42	73.746	73.7561	73.5716	3.00677	2.82423	3.0305	2.36716	2.20622	2.15895	15.7517	13.45	16.0833	66.3442	63.2983	70.6833	5.63744	5.58844	5.77977
895	low	1	2011-06-28	2011	8	8	4491.02	3.65235	3.29055	18.8976	1	2.67117	5	9.83	8.74	10.42	73.746	73.7561	73.5716	3.00677	2.82423	3.0305	2.36716	2.20622	2.15895	15.7517	13.45	16.0833	66.3442	63.2983	70.6833	5.63744	5.58844	5.77977
896	low	1	2011-06-28	2011	8	8	4491.02	3.65235	3.29055	18.8976	0	2.67117	5	9.83	8.74	10.42	73.746	73.7561	73.5716	3.00677	2.82423	3.0305	2.36716	2.20622	2.15895	15.7517	13.45	16.0833	66.3442	63.2983	70.6833	5.63744	5.58844	5.77977
897	low	1	2011-07-29	2011	8	8	4491.02	3.65235	3.29055	18.8976	0	2.64147	5	9.83	8.74	10.42	73.746	73.7561	73.5716	3.00677	2.82423	3.0305	2.36716	2.20622	2.15895	15.7517	13.45	16.0833	66.3442	63.2983	70.6833	5.63744	5.58844	5.77977
898	low	1	2011-07-29	2011	8	8	4491.02	3.65235	3.29055	18.8976	0	2.64147	5	9.83	8.74	10.42	73.746	73.7561	73.5716	3.00677	2.82423	3.0305	2.36716	2.20622	2.15895	15.7517	13.45	16.0833	66.3442	63.2983	70.6833	5.63744	5.58844	5.77977
899	low	1	2011-07-29	2011	8	8	4491.02	3.65235	3.29055	18.8976	0	2.64147	5	9.83	8.74	10.42	73.746	73.7561	73.5716	3.00677	2.82423	3.0305	2.36716	2.20622	2.15895	15.7517	13.45	16.0833	66.3442	63.2983	70.6833	5.63744	5.58844	5.77977
900	low	1	2011-07-29	2011	8	8	4491.02	3.65235	3.29055	18.8976	0	2.64147	5	9.83	8.74	10.42	73.746	73.7561	73.5716	3.00677	2.82423	3.0305	2.36716	2.20622	2.15895	15.7517	13.45	16.0833	66.3442	63.2983	70.6833	5.63744	5.58844	5.77977
901	low	1	2011-07-29	2011	8	8	4491.02	3.65235	3.29055	18.8976	1	2.64147	5	9.83	8.74	10.42	73.746	73.7561	73.5716	3.00677	2.82423	3.0305	2.36716	2.20622	2.15895	15.7517	13.45	16.0833	66.3442	63.2983	70.6833	5.63744	5.58844	5.77977
902	low	1	2011-07-29	2011	8	8	4491.02	3.65235	3.29055	18.8976	0	2.64147	5	9.83	8.74	10.42	73.746	73.7561	73.5716	3.00677	2.82423	3.0305	2.36716	2.20622	2.15895	15.7517	13.45	16.0833	66.3442	63.2983	70.6833	5.63744	5.58844	5.77977
903	low	1	2011-07-29	2011	8	8	4491.02	3.65235	3.29055	18.8976	0	2.64147	5	9.83	8.74	10.42	73.746	73.7561	73.5716	3.00677	2.82423	3.0305	2.36716	2.20622	2.15895	15.7517	13.45	16.0833	66.3442	63.2983	70.6833	5.63744	5.58844	5.77977
904	low	1	2011-07-29	2011	8	8	4491.02	3.65235	3.29055	18.8976	1	2.64147	5	9.83	8.74	10.42	73.746	73.7561	73.5716	3.00677	2.82423	3.0305	2.36716	2.20622	2.15895	15.7517	13.45	16.0833	66.3442	63.2983	70.6833	5.63744	5.58844	5.77977
905	low	1	2011-07-29	2011	8	8	4491.02	3.65235	3.29055	18.8976	0	2.64147	5	9.83	8.74	10.42	73.746	73.7561	73.5716	3.00677	2.82423	3.0305	2.36716	2.20622	2.15895	15.7517	13.45	16.0833	66.3442	63.2983	70.6833	5.63744	5.58844	5.77977
906	low	1	2011-07-29	2011	8	8	4491.02	3.65235	3.29055	18.8976	0	2.64147	5	9.83	8.74	10.42	73.746	73.7561	73.5716	3.00677	2.82423	3.0305	2.36716	2.20622	2.15895	15.7517	13.45	16.0833	66.3442	63.2983	70.6833	5.63744	5.58844	5.77977
907	low	1	2011-07-29	2011	8	8	4491.02	3.65235	3.29055	18.8976	0	2.64147	5	9.83	8.74	10.42	73.746	73.7561	73.5716	3.00677	2.82423	3.0305	2.36716	2.20622	2.15895	15.7517	13.45	16.0833	66.3442	63.2983	70.6833	5.63744	5.58844	5.77977
908	low	1	2011-07-29	2011	8	8	4491.02	3.65235	3.29055	18.8976	0	2.64147	5	9.83	8.74	10.42	73.746	73.7561	73.5716	3.00677	2.82423	3.0305	2.36716	2.20622	2.15895	15.7517	13.45	16.0833	66.3442	63.2983	70.6833	5.63744	5.58844	5.77977
909	low	1	2011-07-29	2011	8	8	4491.02	3.65235	3.29055	18.8976	0	2.64147	5	9.83	8.74	10.42	73.746	73.7561	73.5716	3.00677	2.82423	3.0305	2.36716	2.20622	2.15895	15.7517	13.45	16.0833	66.3442	63.2983	70.6833	5.63744	5.58844	5.77977
910	low	1	2011-07-29	2011	8	8	4491.02	3.65235	3.29055	18.8976	0	2.64147	5	9.83	8.74	10.42	73.746	73.7561	73.5716	3.00677	2.82423	3.0305	2.36716	2.20622	2.15895	15.7517	13.45	16.0833	66.3442	63.2983	70.6833	5.63744	5.58844	5.77977
911	low	1	2011-07-29	2011	8	8	4491.02	3.65235	3.29055	18.8976	0	2.64147	5	9.83	8.74	10.42	73.746	73.7561	73.5716	3.00677	2.82423	3.0305	2.36716	2.20622	2.15895	15.7517	13.45	16.0833	66.3442	63.2983	70.6833	5.63744	5.58844	5.77977
912	low	1	2011-07-29	2011	8	8	4491.02	3.65235	3.29055	18.8976	0	2.64147	5	9.83	8.74	10.42	73.746	73.7561	73.5716	3.00677	2.82423	3.0305	2.36716	2.20622	2.15895	15.7517	13.45	16.0833	66.3442	63.2983	70.6833	5.63744	5.58844	5.77977
913	low	1	2011-07-29	2011	8	8	4491.02	3.65235	3.29055	18.8976	0	2.64147	5	9.83	8.74	10.42	73.746	73.7561	73.5716	3.00677	2.82423	3.0305	2.36716	2.20622	2.15895	15.7517	13.45	16.0833	66.3442	63.2983	70.6833	5.63744	5.58844	5.77977
914	low	1	2011-07-29	2011	8	8	4491.02	3.65235	3.29055	18.8976	0	2.64147	5	9.83	8.74	10.42	73.746	73.7561	73.5716	3.00677	2.82423	3.0305	2.36716	2.20622	2.15895	15.7517	13.45	16.0833	66.3442	63.2983	70.6833	5.63744	5.58844	5.77977
915	low	1	2011-07-29	2011	8	8	4491.02	3.65235	3.29055	18.8976	0	2.64147	5	9.83	8.74	10.42	73.746	73.7561	73.5716	3.00677	2.82423	3.0305	2.36716	2.20622	2.15895	15.7517	13.45	16.0833	66.3442	63.2983	70.6833	5.63744	5.58844	5.77977
916	low	1	2011-07-29	2011	8	8	4491.02	3.65235	3.29055	18.8976	0	2.64147	5	9.83	8.74	10.42	73.746	73.7561	73.5716	3.00677	2.82423	3.0305	2.36716	2.20622	2.15895	15.7517	13.45	16.0833	66.3442	63.2983	70.6833	5.63744	5.58844	5.77977
917	low	1	2012-02-24	2012	9	9	1772.05	3.24848	3.65235	9.87654	0	3.08314	1	8.74	10.42	9.66	73.7561	73.5716	74.5203	2.82423	3.0305	2.80601	2.20622	2.15895	3.31418	13.45	16.0833	14.8892	63.2983	70.6833	71.3575	5.58844	5.77977	4.47688
918	low	1	2012-03-22	2012	9	9	1772.05	3.24848	3.65235	9.87654	0	3.36736	1	8.74	10.42	9.66	73.7561	73.5716	74.5203	2.82423	3.0305	2.80601	2.20622	2.15895	3.31418	13.45	16.0833	14.8892	63.2983	70.6833	71.3575	5.58844	5.77977	4.47688
919	low	1	2012-03-22	2012	9	9	1772.05	3.24848	3.65235	9.87654	0	3.36736	1	8.74	10.42	9.66	73.7561	73.5716	74.5203	2.82423	3.0305	2.80601	2.20622	2.15895	3.31418	13.45	16.0833	14.8892	63.2983	70.6833	71.3575	5.58844	5.77977	4.47688
920	low	1	2012-03-22	2012	9	9	1772.05	3.24848	3.65235	9.87654	0	3.36736	1	8.74	10.42	9.66	73.7561	73.5716	74.5203	2.82423	3.0305	2.80601	2.20622	2.15895	3.31418	13.45	16.0833	14.8892	63.2983	70.6833	71.3575	5.58844	5.77977	4.47688
921	low	1	2012-03-22	2012	9	9	1772.05	3.24848	3.65235	9.87654	0	3.36736	1	8.74	10.42	9.66	73.7561	73.5716	74.5203	2.82423	3.0305	2.80601	2.20622	2.15895	3.31418	13.45	16.0833	14.8892	63.2983	70.6833	71.3575	5.58844	5.77977	4.47688
922	low	1	2012-03-22	2012	9	9	1772.05	3.24848	3.65235	9.87654	0	3.36736	1	8.74	10.42	9.66	73.7561	73.5716	74.5203	2.82423	3.0305	2.80601	2.20622	2.15895	3.31418	13.45	16.0833	14.8892	63.2983	70.6833	71.3575	5.58844	5.77977	4.47688
923	low	1	2012-03-22	2012	9	9	1772.05	3.24848	3.65235	9.87654	0	3.36736	1	8.74	10.42	9.66	73.7561	73.5716	74.5203	2.82423	3.0305	2.80601	2.20622	2.15895	3.31418	13.45	16.0833	14.8892	63.2983	70.6833	71.3575	5.58844	5.77977	4.47688
924	low	1	2012-03-22	2012	9	9	1772.05	3.24848	3.65235	9.87654	0	3.36736	1	8.74	10.42	9.66	73.7561	73.5716	74.5203	2.82423	3.0305	2.80601	2.20622	2.15895	3.31418	13.45	16.0833	14.8892	63.2983	70.6833	71.3575	5.58844	5.77977	4.47688
925	low	1	2012-03-22	2012	9	9	1772.05	3.24848	3.65235	9.87654	0	3.36736	1	8.74	10.42	9.66	73.7561	73.5716	74.5203	2.82423	3.0305	2.80601	2.20622	2.15895	3.31418	13.45	16.0833	14.8892	63.2983	70.6833	71.3575	5.58844	5.77977	4.47688
926	low	1	2012-03-22	2012	9	9	1772.05	3.24848	3.65235	9.87654	0	3.36736	1	8.74	10.42	9.66	73.7561	73.5716	74.5203	2.82423	3.0305	2.80601	2.20622	2.15895	3.31418	13.45	16.0833	14.8892	63.2983	70.6833	71.3575	5.58844	5.77977	4.47688
927	low	1	2012-03-22	2012	9	9	1772.05	3.24848	3.65235	9.87654	0	3.36736	1	8.74	10.42	9.66	73.7561	73.5716	74.5203	2.82423	3.0305	2.80601	2.20622	2.15895	3.31418	13.45	16.0833	14.8892	63.2983	70.6833	71.3575	5.58844	5.77977	4.47688
928	low	1	2012-03-22	2012	9	9	1772.05	3.24848	3.65235	9.87654	0	3.36736	1	8.74	10.42	9.66	73.7561	73.5716	74.5203	2.82423	3.0305	2.80601	2.20622	2.15895	3.31418	13.45	16.0833	14.8892	63.2983	70.6833	71.3575	5.58844	5.77977	4.47688
929	low	1	2012-03-22	2012	9	9	1772.05	3.24848	3.65235	9.87654	0	3.36736	1	8.74	10.42	9.66	73.7561	73.5716	74.5203	2.82423	3.0305	2.80601	2.20622	2.15895	3.31418	13.45	16.0833	14.8892	63.2983	70.6833	71.3575	5.58844	5.77977	4.47688
930	low	1	2012-03-22	2012	9	9	1772.05	3.24848	3.65235	9.87654	0	3.36736	1	8.74	10.42	9.66	73.7561	73.5716	74.5203	2.82423	3.0305	2.80601	2.20622	2.15895	3.31418	13.45	16.0833	14.8892	63.2983	70.6833	71.3575	5.58844	5.77977	4.47688
931	low	1	2012-03-22	2012	9	9	1772.05	3.24848	3.65235	9.87654	0	3.36736	1	8.74	10.42	9.66	73.7561	73.5716	74.5203	2.82423	3.0305	2.80601	2.20622	2.15895	3.31418	13.45	16.0833	14.8892	63.2983	70.6833	71.3575	5.58844	5.77977	4.47688
932	low	1	2012-03-22	2012	9	9	1772.05	3.24848	3.65235	9.87654	0	3.36736	1	8.74	10.42	9.66	73.7561	73.5716	74.5203	2.82423	3.0305	2.80601	2.20622	2.15895	3.31418	13.45	16.0833	14.8892	63.2983	70.6833	71.3575	5.58844	5.77977	4.47688
933	low	1	2012-03-22	2012	9	9	1772.05	3.24848	3.65235	9.87654	0	3.36736	1	8.74	10.42	9.66	73.7561	73.5716	74.5203	2.82423	3.0305	2.80601	2.20622	2.15895	3.31418	13.45	16.0833	14.8892	63.2983	70.6833	71.3575	5.58844	5.77977	4.47688
934	low	1	2012-03-22	2012	9	9	1772.05	3.24848	3.65235	9.87654	0	3.36736	1	8.74	10.42	9.66	73.7561	73.5716	74.5203	2.82423	3.0305	2.80601	2.20622	2.15895	3.31418	13.45	16.0833	14.8892	63.2983	70.6833	71.3575	5.58844	5.77977	4.47688
935	low	1	2012-03-22	2012	9	9	1772.05	3.24848	3.65235	9.87654	0	3.36736	1	8.74	10.42	9.66	73.7561	73.5716	74.5203	2.82423	3.0305	2.80601	2.20622	2.15895	3.31418	13.45	16.0833	14.8892	63.2983	70.6833	71.3575	5.58844	5.77977	4.47688
936	low	1	2012-03-22	2012	9	9	1772.05	3.24848	3.65235	9.87654	0	3.36736	1	8.74	10.42	9.66	73.7561	73.5716	74.5203	2.82423	3.0305	2.80601	2.20622	2.15895	3.31418	13.45	16.0833	14.8892	63.2983	70.6833	71.3575	5.58844	5.77977	4.47688
937	low	1	2012-03-22	2012	9	9	1772.05	3.24848	3.65235	9.87654	1	3.36736	1	8.74	10.42	9.66	73.7561	73.5716	74.5203	2.82423	3.0305	2.80601	2.20622	2.15895	3.31418	13.45	16.0833	14.8892	63.2983	70.6833	71.3575	5.58844	5.77977	4.47688
938	low	1	2012-04-26	2012	9	9	1772.05	3.24848	3.65235	9.87654	0	2.2878	1	8.74	10.42	9.66	73.7561	73.5716	74.5203	2.82423	3.0305	2.80601	2.20622	2.15895	3.31418	13.45	16.0833	14.8892	63.2983	70.6833	71.3575	5.58844	5.77977	4.47688
939	low	1	2012-04-26	2012	9	9	1772.05	3.24848	3.65235	9.87654	0	2.2878	1	8.74	10.42	9.66	73.7561	73.5716	74.5203	2.82423	3.0305	2.80601	2.20622	2.15895	3.31418	13.45	16.0833	14.8892	63.2983	70.6833	71.3575	5.58844	5.77977	4.47688
940	low	1	2012-04-26	2012	9	9	1772.05	3.24848	3.65235	9.87654	0	2.2878	1	8.74	10.42	9.66	73.7561	73.5716	74.5203	2.82423	3.0305	2.80601	2.20622	2.15895	3.31418	13.45	16.0833	14.8892	63.2983	70.6833	71.3575	5.58844	5.77977	4.47688
941	low	1	2012-04-26	2012	9	9	1772.05	3.24848	3.65235	9.87654	0	2.2878	1	8.74	10.42	9.66	73.7561	73.5716	74.5203	2.82423	3.0305	2.80601	2.20622	2.15895	3.31418	13.45	16.0833	14.8892	63.2983	70.6833	71.3575	5.58844	5.77977	4.47688
942	low	1	2012-04-26	2012	9	9	1772.05	3.24848	3.65235	9.87654	1	2.2878	1	8.74	10.42	9.66	73.7561	73.5716	74.5203	2.82423	3.0305	2.80601	2.20622	2.15895	3.31418	13.45	16.0833	14.8892	63.2983	70.6833	71.3575	5.58844	5.77977	4.47688
943	low	1	2012-04-26	2012	9	9	1772.05	3.24848	3.65235	9.87654	0	2.2878	1	8.74	10.42	9.66	73.7561	73.5716	74.5203	2.82423	3.0305	2.80601	2.20622	2.15895	3.31418	13.45	16.0833	14.8892	63.2983	70.6833	71.3575	5.58844	5.77977	4.47688
944	low	1	2012-04-26	2012	9	9	1772.05	3.24848	3.65235	9.87654	0	2.2878	1	8.74	10.42	9.66	73.7561	73.5716	74.5203	2.82423	3.0305	2.80601	2.20622	2.15895	3.31418	13.45	16.0833	14.8892	63.2983	70.6833	71.3575	5.58844	5.77977	4.47688
945	low	1	2012-04-26	2012	9	9	1772.05	3.24848	3.65235	9.87654	0	2.2878	1	8.74	10.42	9.66	73.7561	73.5716	74.5203	2.82423	3.0305	2.80601	2.20622	2.15895	3.31418	13.45	16.0833	14.8892	63.2983	70.6833	71.3575	5.58844	5.77977	4.47688
946	low	1	2012-04-26	2012	9	9	1772.05	3.24848	3.65235	9.87654	0	2.2878	1	8.74	10.42	9.66	73.7561	73.5716	74.5203	2.82423	3.0305	2.80601	2.20622	2.15895	3.31418	13.45	16.0833	14.8892	63.2983	70.6833	71.3575	5.58844	5.77977	4.47688
947	low	1	2012-04-26	2012	9	9	1772.05	3.24848	3.65235	9.87654	1	2.2878	1	8.74	10.42	9.66	73.7561	73.5716	74.5203	2.82423	3.0305	2.80601	2.20622	2.15895	3.31418	13.45	16.0833	14.8892	63.2983	70.6833	71.3575	5.58844	5.77977	4.47688
948	low	1	2012-04-26	2012	9	9	1772.05	3.24848	3.65235	9.87654	1	2.2878	1	8.74	10.42	9.66	73.7561	73.5716	74.5203	2.82423	3.0305	2.80601	2.20622	2.15895	3.31418	13.45	16.0833	14.8892	63.2983	70.6833	71.3575	5.58844	5.77977	4.47688
949	low	1	2012-04-26	2012	9	9	1772.05	3.24848	3.65235	9.87654	0	2.2878	1	8.74	10.42	9.66	73.7561	73.5716	74.5203	2.82423	3.0305	2.80601	2.20622	2.15895	3.31418	13.45	16.0833	14.8892	63.2983	70.6833	71.3575	5.58844	5.77977	4.47688
950	low	1	2012-04-26	2012	9	9	1772.05	3.24848	3.65235	9.87654	0	2.2878	1	8.74	10.42	9.66	73.7561	73.5716	74.5203	2.82423	3.0305	2.80601	2.20622	2.15895	3.31418	13.45	16.0833	14.8892	63.2983	70.6833	71.3575	5.58844	5.77977	4.47688
951	low	1	2012-04-26	2012	9	9	1772.05	3.24848	3.65235	9.87654	1	2.2878	1	8.74	10.42	9.66	73.7561	73.5716	74.5203	2.82423	3.0305	2.80601	2.20622	2.15895	3.31418	13.45	16.0833	14.8892	63.2983	70.6833	71.3575	5.58844	5.77977	4.47688
952	low	1	2012-04-26	2012	9	9	1772.05	3.24848	3.65235	9.87654	1	2.2878	1	8.74	10.42	9.66	73.7561	73.5716	74.5203	2.82423	3.0305	2.80601	2.20622	2.15895	3.31418	13.45	16.0833	14.8892	63.2983	70.6833	71.3575	5.58844	5.77977	4.47688
953	low	1	2012-04-26	2012	9	9	1772.05	3.24848	3.65235	9.87654	0	2.2878	1	8.74	10.42	9.66	73.7561	73.5716	74.5203	2.82423	3.0305	2.80601	2.20622	2.15895	3.31418	13.45	16.0833	14.8892	63.2983	70.6833	71.3575	5.58844	5.77977	4.47688
954	low	1	2012-04-26	2012	9	9	1772.05	3.24848	3.65235	9.87654	0	2.2878	1	8.74	10.42	9.66	73.7561	73.5716	74.5203	2.82423	3.0305	2.80601	2.20622	2.15895	3.31418	13.45	16.0833	14.8892	63.2983	70.6833	71.3575	5.58844	5.77977	4.47688
955	low	1	2012-04-26	2012	9	9	1772.05	3.24848	3.65235	9.87654	0	2.2878	1	8.74	10.42	9.66	73.7561	73.5716	74.5203	2.82423	3.0305	2.80601	2.20622	2.15895	3.31418	13.45	16.0833	14.8892	63.2983	70.6833	71.3575	5.58844	5.77977	4.47688
956	low	1	2012-04-26	2012	9	9	1772.05	3.24848	3.65235	9.87654	0	2.28556	1	8.74	10.42	9.66	73.7561	73.5716	74.5203	2.82423	3.0305	2.80601	2.20622	2.15895	3.31418	13.45	16.0833	14.8892	63.2983	70.6833	71.3575	5.58844	5.77977	4.47688
957	low	1	2012-04-26	2012	9	9	1772.05	3.24848	3.65235	9.87654	0	2.2878	1	8.74	10.42	9.66	73.7561	73.5716	74.5203	2.82423	3.0305	2.80601	2.20622	2.15895	3.31418	13.45	16.0833	14.8892	63.2983	70.6833	71.3575	5.58844	5.77977	4.47688
958	low	1	2012-05-24	2012	9	9	1772.05	3.24848	3.65235	9.87654	0	2.20683	1	8.74	10.42	9.66	73.7561	73.5716	74.5203	2.82423	3.0305	2.80601	2.20622	2.15895	3.31418	13.45	16.0833	14.8892	63.2983	70.6833	71.3575	5.58844	5.77977	4.47688
959	low	1	2012-05-24	2012	9	9	1772.05	3.24848	3.65235	9.87654	0	2.20683	1	8.74	10.42	9.66	73.7561	73.5716	74.5203	2.82423	3.0305	2.80601	2.20622	2.15895	3.31418	13.45	16.0833	14.8892	63.2983	70.6833	71.3575	5.58844	5.77977	4.47688
960	low	1	2012-05-24	2012	9	9	1772.05	3.24848	3.65235	9.87654	0	2.20683	1	8.74	10.42	9.66	73.7561	73.5716	74.5203	2.82423	3.0305	2.80601	2.20622	2.15895	3.31418	13.45	16.0833	14.8892	63.2983	70.6833	71.3575	5.58844	5.77977	4.47688
961	low	1	2012-05-24	2012	9	9	1772.05	3.24848	3.65235	9.87654	0	2.20683	1	8.74	10.42	9.66	73.7561	73.5716	74.5203	2.82423	3.0305	2.80601	2.20622	2.15895	3.31418	13.45	16.0833	14.8892	63.2983	70.6833	71.3575	5.58844	5.77977	4.47688
962	low	1	2012-05-24	2012	9	9	1772.05	3.24848	3.65235	9.87654	0	2.20683	1	8.74	10.42	9.66	73.7561	73.5716	74.5203	2.82423	3.0305	2.80601	2.20622	2.15895	3.31418	13.45	16.0833	14.8892	63.2983	70.6833	71.3575	5.58844	5.77977	4.47688
963	low	1	2012-05-24	2012	9	9	1772.05	3.24848	3.65235	9.87654	1	2.20683	1	8.74	10.42	9.66	73.7561	73.5716	74.5203	2.82423	3.0305	2.80601	2.20622	2.15895	3.31418	13.45	16.0833	14.8892	63.2983	70.6833	71.3575	5.58844	5.77977	4.47688
964	low	1	2012-05-24	2012	9	9	1772.05	3.24848	3.65235	9.87654	0	2.20683	1	8.74	10.42	9.66	73.7561	73.5716	74.5203	2.82423	3.0305	2.80601	2.20622	2.15895	3.31418	13.45	16.0833	14.8892	63.2983	70.6833	71.3575	5.58844	5.77977	4.47688
965	low	1	2012-05-24	2012	9	9	1772.05	3.24848	3.65235	9.87654	1	2.20683	1	8.74	10.42	9.66	73.7561	73.5716	74.5203	2.82423	3.0305	2.80601	2.20622	2.15895	3.31418	13.45	16.0833	14.8892	63.2983	70.6833	71.3575	5.58844	5.77977	4.47688
966	low	1	2012-05-24	2012	9	9	1772.05	3.24848	3.65235	9.87654	1	2.20683	1	8.74	10.42	9.66	73.7561	73.5716	74.5203	2.82423	3.0305	2.80601	2.20622	2.15895	3.31418	13.45	16.0833	14.8892	63.2983	70.6833	71.3575	5.58844	5.77977	4.47688
967	low	1	2012-05-24	2012	9	9	1772.05	3.24848	3.65235	9.87654	1	2.20683	1	8.74	10.42	9.66	73.7561	73.5716	74.5203	2.82423	3.0305	2.80601	2.20622	2.15895	3.31418	13.45	16.0833	14.8892	63.2983	70.6833	71.3575	5.58844	5.77977	4.47688
968	low	1	2012-05-24	2012	9	9	1772.05	3.24848	3.65235	9.87654	0	2.20683	1	8.74	10.42	9.66	73.7561	73.5716	74.5203	2.82423	3.0305	2.80601	2.20622	2.15895	3.31418	13.45	16.0833	14.8892	63.2983	70.6833	71.3575	5.58844	5.77977	4.47688
969	low	1	2012-05-24	2012	9	9	1772.05	3.24848	3.65235	9.87654	0	2.20683	1	8.74	10.42	9.66	73.7561	73.5716	74.5203	2.82423	3.0305	2.80601	2.20622	2.15895	3.31418	13.45	16.0833	14.8892	63.2983	70.6833	71.3575	5.58844	5.77977	4.47688
970	low	1	2012-05-24	2012	9	9	1772.05	3.24848	3.65235	9.87654	0	2.20683	1	8.74	10.42	9.66	73.7561	73.5716	74.5203	2.82423	3.0305	2.80601	2.20622	2.15895	3.31418	13.45	16.0833	14.8892	63.2983	70.6833	71.3575	5.58844	5.77977	4.47688
971	low	1	2012-05-24	2012	9	9	1772.05	3.24848	3.65235	9.87654	0	2.20683	1	8.74	10.42	9.66	73.7561	73.5716	74.5203	2.82423	3.0305	2.80601	2.20622	2.15895	3.31418	13.45	16.0833	14.8892	63.2983	70.6833	71.3575	5.58844	5.77977	4.47688
972	low	1	2012-05-24	2012	9	9	1772.05	3.24848	3.65235	9.87654	0	2.20683	1	8.74	10.42	9.66	73.7561	73.5716	74.5203	2.82423	3.0305	2.80601	2.20622	2.15895	3.31418	13.45	16.0833	14.8892	63.2983	70.6833	71.3575	5.58844	5.77977	4.47688
973	low	1	2012-05-24	2012	9	9	1772.05	3.24848	3.65235	9.87654	0	2.20683	1	8.74	10.42	9.66	73.7561	73.5716	74.5203	2.82423	3.0305	2.80601	2.20622	2.15895	3.31418	13.45	16.0833	14.8892	63.2983	70.6833	71.3575	5.58844	5.77977	4.47688
974	low	1	2012-05-24	2012	9	9	1772.05	3.24848	3.65235	9.87654	0	2.20683	1	8.74	10.42	9.66	73.7561	73.5716	74.5203	2.82423	3.0305	2.80601	2.20622	2.15895	3.31418	13.45	16.0833	14.8892	63.2983	70.6833	71.3575	5.58844	5.77977	4.47688
975	low	1	2012-05-24	2012	9	9	1772.05	3.24848	3.65235	9.87654	0	2.20683	1	8.74	10.42	9.66	73.7561	73.5716	74.5203	2.82423	3.0305	2.80601	2.20622	2.15895	3.31418	13.45	16.0833	14.8892	63.2983	70.6833	71.3575	5.58844	5.77977	4.47688
976	low	1	2012-05-24	2012	9	9	1772.05	3.24848	3.65235	9.87654	0	2.20683	1	8.74	10.42	9.66	73.7561	73.5716	74.5203	2.82423	3.0305	2.80601	2.20622	2.15895	3.31418	13.45	16.0833	14.8892	63.2983	70.6833	71.3575	5.58844	5.77977	4.47688
977	low	1	2012-05-24	2012	9	9	1772.05	3.24848	3.65235	9.87654	1	2.20683	1	8.74	10.42	9.66	73.7561	73.5716	74.5203	2.82423	3.0305	2.80601	2.20622	2.15895	3.31418	13.45	16.0833	14.8892	63.2983	70.6833	71.3575	5.58844	5.77977	4.47688
978	low	1	2012-06-22	2012	9	9	1772.05	3.24848	3.65235	9.87654	0	2.12385	1	8.74	10.42	9.66	73.7561	73.5716	74.5203	2.82423	3.0305	2.80601	2.20622	2.15895	3.31418	13.45	16.0833	14.8892	63.2983	70.6833	71.3575	5.58844	5.77977	4.47688
979	low	1	2012-06-22	2012	9	9	1772.05	3.24848	3.65235	9.87654	0	2.12385	1	8.74	10.42	9.66	73.7561	73.5716	74.5203	2.82423	3.0305	2.80601	2.20622	2.15895	3.31418	13.45	16.0833	14.8892	63.2983	70.6833	71.3575	5.58844	5.77977	4.47688
980	low	1	2012-06-22	2012	9	9	1772.05	3.24848	3.65235	9.87654	0	2.12385	1	8.74	10.42	9.66	73.7561	73.5716	74.5203	2.82423	3.0305	2.80601	2.20622	2.15895	3.31418	13.45	16.0833	14.8892	63.2983	70.6833	71.3575	5.58844	5.77977	4.47688
981	low	1	2012-06-22	2012	9	9	1772.05	3.24848	3.65235	9.87654	0	2.12385	1	8.74	10.42	9.66	73.7561	73.5716	74.5203	2.82423	3.0305	2.80601	2.20622	2.15895	3.31418	13.45	16.0833	14.8892	63.2983	70.6833	71.3575	5.58844	5.77977	4.47688
982	low	1	2012-06-22	2012	9	9	1772.05	3.24848	3.65235	9.87654	0	2.12385	1	8.74	10.42	9.66	73.7561	73.5716	74.5203	2.82423	3.0305	2.80601	2.20622	2.15895	3.31418	13.45	16.0833	14.8892	63.2983	70.6833	71.3575	5.58844	5.77977	4.47688
983	low	1	2012-06-22	2012	9	9	1772.05	3.24848	3.65235	9.87654	0	2.12385	1	8.74	10.42	9.66	73.7561	73.5716	74.5203	2.82423	3.0305	2.80601	2.20622	2.15895	3.31418	13.45	16.0833	14.8892	63.2983	70.6833	71.3575	5.58844	5.77977	4.47688
984	low	1	2012-06-22	2012	9	9	1772.05	3.24848	3.65235	9.87654	0	2.12385	1	8.74	10.42	9.66	73.7561	73.5716	74.5203	2.82423	3.0305	2.80601	2.20622	2.15895	3.31418	13.45	16.0833	14.8892	63.2983	70.6833	71.3575	5.58844	5.77977	4.47688
985	low	1	2012-06-22	2012	9	9	1772.05	3.24848	3.65235	9.87654	0	2.12385	1	8.74	10.42	9.66	73.7561	73.5716	74.5203	2.82423	3.0305	2.80601	2.20622	2.15895	3.31418	13.45	16.0833	14.8892	63.2983	70.6833	71.3575	5.58844	5.77977	4.47688
986	low	1	2012-06-22	2012	9	9	1772.05	3.24848	3.65235	9.87654	0	2.12385	1	8.74	10.42	9.66	73.7561	73.5716	74.5203	2.82423	3.0305	2.80601	2.20622	2.15895	3.31418	13.45	16.0833	14.8892	63.2983	70.6833	71.3575	5.58844	5.77977	4.47688
987	low	1	2012-06-22	2012	9	9	1772.05	3.24848	3.65235	9.87654	0	2.12385	1	8.74	10.42	9.66	73.7561	73.5716	74.5203	2.82423	3.0305	2.80601	2.20622	2.15895	3.31418	13.45	16.0833	14.8892	63.2983	70.6833	71.3575	5.58844	5.77977	4.47688
988	low	1	2012-06-22	2012	9	9	1772.05	3.24848	3.65235	9.87654	1	2.12385	1	8.74	10.42	9.66	73.7561	73.5716	74.5203	2.82423	3.0305	2.80601	2.20622	2.15895	3.31418	13.45	16.0833	14.8892	63.2983	70.6833	71.3575	5.58844	5.77977	4.47688
989	low	1	2012-06-22	2012	9	9	1772.05	3.24848	3.65235	9.87654	0	2.12385	1	8.74	10.42	9.66	73.7561	73.5716	74.5203	2.82423	3.0305	2.80601	2.20622	2.15895	3.31418	13.45	16.0833	14.8892	63.2983	70.6833	71.3575	5.58844	5.77977	4.47688
990	low	1	2012-06-22	2012	9	9	1772.05	3.24848	3.65235	9.87654	0	2.12385	1	8.74	10.42	9.66	73.7561	73.5716	74.5203	2.82423	3.0305	2.80601	2.20622	2.15895	3.31418	13.45	16.0833	14.8892	63.2983	70.6833	71.3575	5.58844	5.77977	4.47688
991	low	1	2012-06-22	2012	9	9	1772.05	3.24848	3.65235	9.87654	0	2.12385	1	8.74	10.42	9.66	73.7561	73.5716	74.5203	2.82423	3.0305	2.80601	2.20622	2.15895	3.31418	13.45	16.0833	14.8892	63.2983	70.6833	71.3575	5.58844	5.77977	4.47688
992	low	1	2012-06-22	2012	9	9	1772.05	3.24848	3.65235	9.87654	0	2.12385	1	8.74	10.42	9.66	73.7561	73.5716	74.5203	2.82423	3.0305	2.80601	2.20622	2.15895	3.31418	13.45	16.0833	14.8892	63.2983	70.6833	71.3575	5.58844	5.77977	4.47688
993	low	1	2012-06-22	2012	9	9	1772.05	3.24848	3.65235	9.87654	0	2.12385	1	8.74	10.42	9.66	73.7561	73.5716	74.5203	2.82423	3.0305	2.80601	2.20622	2.15895	3.31418	13.45	16.0833	14.8892	63.2983	70.6833	71.3575	5.58844	5.77977	4.47688
994	low	1	2012-06-22	2012	9	9	1772.05	3.24848	3.65235	9.87654	0	2.12385	1	8.74	10.42	9.66	73.7561	73.5716	74.5203	2.82423	3.0305	2.80601	2.20622	2.15895	3.31418	13.45	16.0833	14.8892	63.2983	70.6833	71.3575	5.58844	5.77977	4.47688
995	low	1	2012-06-22	2012	9	9	1772.05	3.24848	3.65235	9.87654	0	2.12385	1	8.74	10.42	9.66	73.7561	73.5716	74.5203	2.82423	3.0305	2.80601	2.20622	2.15895	3.31418	13.45	16.0833	14.8892	63.2983	70.6833	71.3575	5.58844	5.77977	4.47688
996	low	1	2012-06-22	2012	9	9	1772.05	3.24848	3.65235	9.87654	0	2.12385	1	8.74	10.42	9.66	73.7561	73.5716	74.5203	2.82423	3.0305	2.80601	2.20622	2.15895	3.31418	13.45	16.0833	14.8892	63.2983	70.6833	71.3575	5.58844	5.77977	4.47688
997	low	1	2012-06-22	2012	9	9	1772.05	3.24848	3.65235	9.87654	0	2.12385	1	8.74	10.42	9.66	73.7561	73.5716	74.5203	2.82423	3.0305	2.80601	2.20622	2.15895	3.31418	13.45	16.0833	14.8892	63.2983	70.6833	71.3575	5.58844	5.77977	4.47688
998	low	1	2012-07-18	2012	9	9	1772.05	3.24848	3.65235	9.87654	0	3.35832	1	8.74	10.42	9.66	73.7561	73.5716	74.5203	2.82423	3.0305	2.80601	2.20622	2.15895	3.31418	13.45	16.0833	14.8892	63.2983	70.6833	71.3575	5.58844	5.77977	4.47688
999	low	1	2012-07-18	2012	9	9	1772.05	3.24848	3.65235	9.87654	0	3.35832	1	8.74	10.42	9.66	73.7561	73.5716	74.5203	2.82423	3.0305	2.80601	2.20622	2.15895	3.31418	13.45	16.0833	14.8892	63.2983	70.6833	71.3575	5.58844	5.77977	4.47688
1000	low	1	2012-07-18	2012	9	9	1772.05	3.24848	3.65235	9.87654	0	3.35832	1	8.74	10.42	9.66	73.7561	73.5716	74.5203	2.82423	3.0305	2.80601	2.20622	2.15895	3.31418	13.45	16.0833	14.8892	63.2983	70.6833	71.3575	5.58844	5.77977	4.47688
1001	low	1	2012-07-18	2012	9	9	1772.05	3.24848	3.65235	9.87654	0	3.35832	1	8.74	10.42	9.66	73.7561	73.5716	74.5203	2.82423	3.0305	2.80601	2.20622	2.15895	3.31418	13.45	16.0833	14.8892	63.2983	70.6833	71.3575	5.58844	5.77977	4.47688
1002	low	1	2012-07-18	2012	9	9	1772.05	3.24848	3.65235	9.87654	0	3.35832	1	8.74	10.42	9.66	73.7561	73.5716	74.5203	2.82423	3.0305	2.80601	2.20622	2.15895	3.31418	13.45	16.0833	14.8892	63.2983	70.6833	71.3575	5.58844	5.77977	4.47688
1003	low	1	2012-08-28	2012	9	9	1772.05	3.24848	3.65235	9.87654	0	3.35315	1	8.74	10.42	9.66	73.7561	73.5716	74.5203	2.82423	3.0305	2.80601	2.20622	2.15895	3.31418	13.45	16.0833	14.8892	63.2983	70.6833	71.3575	5.58844	5.77977	4.47688
1004	low	1	2012-08-28	2012	9	9	1772.05	3.24848	3.65235	9.87654	0	3.4183	1	8.74	10.42	9.66	73.7561	73.5716	74.5203	2.82423	3.0305	2.80601	2.20622	2.15895	3.31418	13.45	16.0833	14.8892	63.2983	70.6833	71.3575	5.58844	5.77977	4.47688
1005	low	1	2012-08-28	2012	9	9	1772.05	3.24848	3.65235	9.87654	0	3.35315	1	8.74	10.42	9.66	73.7561	73.5716	74.5203	2.82423	3.0305	2.80601	2.20622	2.15895	3.31418	13.45	16.0833	14.8892	63.2983	70.6833	71.3575	5.58844	5.77977	4.47688
1006	low	1	2012-08-28	2012	9	9	1772.05	3.24848	3.65235	9.87654	0	3.35315	1	8.74	10.42	9.66	73.7561	73.5716	74.5203	2.82423	3.0305	2.80601	2.20622	2.15895	3.31418	13.45	16.0833	14.8892	63.2983	70.6833	71.3575	5.58844	5.77977	4.47688
1007	low	1	2012-08-28	2012	9	9	1772.05	3.24848	3.65235	9.87654	0	3.35315	1	8.74	10.42	9.66	73.7561	73.5716	74.5203	2.82423	3.0305	2.80601	2.20622	2.15895	3.31418	13.45	16.0833	14.8892	63.2983	70.6833	71.3575	5.58844	5.77977	4.47688
1008	low	1	2012-08-28	2012	9	9	1772.05	3.24848	3.65235	9.87654	0	3.35315	1	8.74	10.42	9.66	73.7561	73.5716	74.5203	2.82423	3.0305	2.80601	2.20622	2.15895	3.31418	13.45	16.0833	14.8892	63.2983	70.6833	71.3575	5.58844	5.77977	4.47688
1009	low	1	2012-08-28	2012	9	9	1772.05	3.24848	3.65235	9.87654	0	3.35315	1	8.74	10.42	9.66	73.7561	73.5716	74.5203	2.82423	3.0305	2.80601	2.20622	2.15895	3.31418	13.45	16.0833	14.8892	63.2983	70.6833	71.3575	5.58844	5.77977	4.47688
1010	low	1	2012-08-28	2012	9	9	1772.05	3.24848	3.65235	9.87654	0	3.35315	1	8.74	10.42	9.66	73.7561	73.5716	74.5203	2.82423	3.0305	2.80601	2.20622	2.15895	3.31418	13.45	16.0833	14.8892	63.2983	70.6833	71.3575	5.58844	5.77977	4.47688
1011	low	1	2012-08-28	2012	9	9	1772.05	3.24848	3.65235	9.87654	1	3.35315	1	8.74	10.42	9.66	73.7561	73.5716	74.5203	2.82423	3.0305	2.80601	2.20622	2.15895	3.31418	13.45	16.0833	14.8892	63.2983	70.6833	71.3575	5.58844	5.77977	4.47688
1012	low	1	2012-08-28	2012	9	9	1772.05	3.24848	3.65235	9.87654	1	3.35315	1	8.74	10.42	9.66	73.7561	73.5716	74.5203	2.82423	3.0305	2.80601	2.20622	2.15895	3.31418	13.45	16.0833	14.8892	63.2983	70.6833	71.3575	5.58844	5.77977	4.47688
1013	low	1	2012-08-28	2012	9	9	1772.05	3.24848	3.65235	9.87654	0	3.35315	1	8.74	10.42	9.66	73.7561	73.5716	74.5203	2.82423	3.0305	2.80601	2.20622	2.15895	3.31418	13.45	16.0833	14.8892	63.2983	70.6833	71.3575	5.58844	5.77977	4.47688
1014	low	1	2012-08-28	2012	9	9	1772.05	3.24848	3.65235	9.87654	0	3.35315	1	8.74	10.42	9.66	73.7561	73.5716	74.5203	2.82423	3.0305	2.80601	2.20622	2.15895	3.31418	13.45	16.0833	14.8892	63.2983	70.6833	71.3575	5.58844	5.77977	4.47688
1015	low	1	2012-08-28	2012	9	9	1772.05	3.24848	3.65235	9.87654	0	3.35315	1	8.74	10.42	9.66	73.7561	73.5716	74.5203	2.82423	3.0305	2.80601	2.20622	2.15895	3.31418	13.45	16.0833	14.8892	63.2983	70.6833	71.3575	5.58844	5.77977	4.47688
1016	low	1	2012-08-28	2012	9	9	1772.05	3.24848	3.65235	9.87654	0	3.35315	1	8.74	10.42	9.66	73.7561	73.5716	74.5203	2.82423	3.0305	2.80601	2.20622	2.15895	3.31418	13.45	16.0833	14.8892	63.2983	70.6833	71.3575	5.58844	5.77977	4.47688
1017	low	1	2012-08-28	2012	9	9	1772.05	3.24848	3.65235	9.87654	0	3.35315	1	8.74	10.42	9.66	73.7561	73.5716	74.5203	2.82423	3.0305	2.80601	2.20622	2.15895	3.31418	13.45	16.0833	14.8892	63.2983	70.6833	71.3575	5.58844	5.77977	4.47688
1018	low	1	2012-08-28	2012	9	9	1772.05	3.24848	3.65235	9.87654	1	3.35315	1	8.74	10.42	9.66	73.7561	73.5716	74.5203	2.82423	3.0305	2.80601	2.20622	2.15895	3.31418	13.45	16.0833	14.8892	63.2983	70.6833	71.3575	5.58844	5.77977	4.47688
1019	low	1	2012-08-28	2012	9	9	1772.05	3.24848	3.65235	9.87654	0	3.35315	1	8.74	10.42	9.66	73.7561	73.5716	74.5203	2.82423	3.0305	2.80601	2.20622	2.15895	3.31418	13.45	16.0833	14.8892	63.2983	70.6833	71.3575	5.58844	5.77977	4.47688
1020	low	1	2012-08-28	2012	9	9	1772.05	3.24848	3.65235	9.87654	0	3.35315	1	8.74	10.42	9.66	73.7561	73.5716	74.5203	2.82423	3.0305	2.80601	2.20622	2.15895	3.31418	13.45	16.0833	14.8892	63.2983	70.6833	71.3575	5.58844	5.77977	4.47688
1021	low	1	2012-08-28	2012	9	9	1772.05	3.24848	3.65235	9.87654	0	3.35315	1	8.74	10.42	9.66	73.7561	73.5716	74.5203	2.82423	3.0305	2.80601	2.20622	2.15895	3.31418	13.45	16.0833	14.8892	63.2983	70.6833	71.3575	5.58844	5.77977	4.47688
1022	low	1	2012-08-28	2012	9	9	1772.05	3.24848	3.65235	9.87654	0	3.35315	1	8.74	10.42	9.66	73.7561	73.5716	74.5203	2.82423	3.0305	2.80601	2.20622	2.15895	3.31418	13.45	16.0833	14.8892	63.2983	70.6833	71.3575	5.58844	5.77977	4.47688
1023	low	1	2012-09-20	2012	9	9	1772.05	3.24848	3.65235	9.87654	0	3.34908	1	8.74	10.42	9.66	73.7561	73.5716	74.5203	2.82423	3.0305	2.80601	2.20622	2.15895	3.31418	13.45	16.0833	14.8892	63.2983	70.6833	71.3575	5.58844	5.77977	4.47688
1024	low	1	2012-09-20	2012	9	9	1772.05	3.24848	3.65235	9.87654	0	3.34908	1	8.74	10.42	9.66	73.7561	73.5716	74.5203	2.82423	3.0305	2.80601	2.20622	2.15895	3.31418	13.45	16.0833	14.8892	63.2983	70.6833	71.3575	5.58844	5.77977	4.47688
1025	low	1	2012-09-20	2012	9	9	1772.05	3.24848	3.65235	9.87654	0	3.34908	1	8.74	10.42	9.66	73.7561	73.5716	74.5203	2.82423	3.0305	2.80601	2.20622	2.15895	3.31418	13.45	16.0833	14.8892	63.2983	70.6833	71.3575	5.58844	5.77977	4.47688
1026	low	1	2012-09-20	2012	9	9	1772.05	3.24848	3.65235	9.87654	0	3.34908	1	8.74	10.42	9.66	73.7561	73.5716	74.5203	2.82423	3.0305	2.80601	2.20622	2.15895	3.31418	13.45	16.0833	14.8892	63.2983	70.6833	71.3575	5.58844	5.77977	4.47688
1027	low	1	2012-09-20	2012	9	9	1772.05	3.24848	3.65235	9.87654	0	3.34908	1	8.74	10.42	9.66	73.7561	73.5716	74.5203	2.82423	3.0305	2.80601	2.20622	2.15895	3.31418	13.45	16.0833	14.8892	63.2983	70.6833	71.3575	5.58844	5.77977	4.47688
1028	low	1	2012-09-20	2012	9	9	1772.05	3.24848	3.65235	9.87654	0	3.34908	1	8.74	10.42	9.66	73.7561	73.5716	74.5203	2.82423	3.0305	2.80601	2.20622	2.15895	3.31418	13.45	16.0833	14.8892	63.2983	70.6833	71.3575	5.58844	5.77977	4.47688
1029	low	1	2012-09-20	2012	9	9	1772.05	3.24848	3.65235	9.87654	0	3.34908	1	8.74	10.42	9.66	73.7561	73.5716	74.5203	2.82423	3.0305	2.80601	2.20622	2.15895	3.31418	13.45	16.0833	14.8892	63.2983	70.6833	71.3575	5.58844	5.77977	4.47688
1030	low	1	2012-09-20	2012	9	9	1772.05	3.24848	3.65235	9.87654	0	3.34908	1	8.74	10.42	9.66	73.7561	73.5716	74.5203	2.82423	3.0305	2.80601	2.20622	2.15895	3.31418	13.45	16.0833	14.8892	63.2983	70.6833	71.3575	5.58844	5.77977	4.47688
1031	low	1	2012-09-20	2012	9	9	1772.05	3.24848	3.65235	9.87654	0	3.34908	1	8.74	10.42	9.66	73.7561	73.5716	74.5203	2.82423	3.0305	2.80601	2.20622	2.15895	3.31418	13.45	16.0833	14.8892	63.2983	70.6833	71.3575	5.58844	5.77977	4.47688
1032	low	1	2012-09-20	2012	9	9	1772.05	3.24848	3.65235	9.87654	0	3.34908	1	8.74	10.42	9.66	73.7561	73.5716	74.5203	2.82423	3.0305	2.80601	2.20622	2.15895	3.31418	13.45	16.0833	14.8892	63.2983	70.6833	71.3575	5.58844	5.77977	4.47688
1033	low	1	2012-09-20	2012	9	9	1772.05	3.24848	3.65235	9.87654	0	3.34908	1	8.74	10.42	9.66	73.7561	73.5716	74.5203	2.82423	3.0305	2.80601	2.20622	2.15895	3.31418	13.45	16.0833	14.8892	63.2983	70.6833	71.3575	5.58844	5.77977	4.47688
1034	low	1	2012-09-20	2012	9	9	1772.05	3.24848	3.65235	9.87654	0	3.34908	1	8.74	10.42	9.66	73.7561	73.5716	74.5203	2.82423	3.0305	2.80601	2.20622	2.15895	3.31418	13.45	16.0833	14.8892	63.2983	70.6833	71.3575	5.58844	5.77977	4.47688
1035	low	1	2012-09-20	2012	9	9	1772.05	3.24848	3.65235	9.87654	0	3.34908	1	8.74	10.42	9.66	73.7561	73.5716	74.5203	2.82423	3.0305	2.80601	2.20622	2.15895	3.31418	13.45	16.0833	14.8892	63.2983	70.6833	71.3575	5.58844	5.77977	4.47688
1036	low	1	2012-09-20	2012	9	9	1772.05	3.24848	3.65235	9.87654	0	3.34908	1	8.74	10.42	9.66	73.7561	73.5716	74.5203	2.82423	3.0305	2.80601	2.20622	2.15895	3.31418	13.45	16.0833	14.8892	63.2983	70.6833	71.3575	5.58844	5.77977	4.47688
1037	low	1	2012-09-20	2012	9	9	1772.05	3.24848	3.65235	9.87654	0	3.34908	1	8.74	10.42	9.66	73.7561	73.5716	74.5203	2.82423	3.0305	2.80601	2.20622	2.15895	3.31418	13.45	16.0833	14.8892	63.2983	70.6833	71.3575	5.58844	5.77977	4.47688
1038	low	1	2012-09-20	2012	9	9	1772.05	3.24848	3.65235	9.87654	0	3.34908	1	8.74	10.42	9.66	73.7561	73.5716	74.5203	2.82423	3.0305	2.80601	2.20622	2.15895	3.31418	13.45	16.0833	14.8892	63.2983	70.6833	71.3575	5.58844	5.77977	4.47688
1039	low	1	2012-09-20	2012	9	9	1772.05	3.24848	3.65235	9.87654	0	3.34908	1	8.74	10.42	9.66	73.7561	73.5716	74.5203	2.82423	3.0305	2.80601	2.20622	2.15895	3.31418	13.45	16.0833	14.8892	63.2983	70.6833	71.3575	5.58844	5.77977	4.47688
1040	low	1	2012-09-20	2012	9	9	1772.05	3.24848	3.65235	9.87654	0	3.34908	1	8.74	10.42	9.66	73.7561	73.5716	74.5203	2.82423	3.0305	2.80601	2.20622	2.15895	3.31418	13.45	16.0833	14.8892	63.2983	70.6833	71.3575	5.58844	5.77977	4.47688
1041	low	1	2012-09-20	2012	9	9	1772.05	3.24848	3.65235	9.87654	1	3.34908	1	8.74	10.42	9.66	73.7561	73.5716	74.5203	2.82423	3.0305	2.80601	2.20622	2.15895	3.31418	13.45	16.0833	14.8892	63.2983	70.6833	71.3575	5.58844	5.77977	4.47688
1042	low	1	2012-09-20	2012	9	9	1772.05	3.24848	3.65235	9.87654	0	3.34908	1	8.74	10.42	9.66	73.7561	73.5716	74.5203	2.82423	3.0305	2.80601	2.20622	2.15895	3.31418	13.45	16.0833	14.8892	63.2983	70.6833	71.3575	5.58844	5.77977	4.47688
1043	low	1	2012-10-23	2012	9	9	1772.05	3.24848	3.65235	9.87654	0	3.34341	1	8.74	10.42	9.66	73.7561	73.5716	74.5203	2.82423	3.0305	2.80601	2.20622	2.15895	3.31418	13.45	16.0833	14.8892	63.2983	70.6833	71.3575	5.58844	5.77977	4.47688
1044	low	1	2012-10-23	2012	9	9	1772.05	3.24848	3.65235	9.87654	0	3.34341	1	8.74	10.42	9.66	73.7561	73.5716	74.5203	2.82423	3.0305	2.80601	2.20622	2.15895	3.31418	13.45	16.0833	14.8892	63.2983	70.6833	71.3575	5.58844	5.77977	4.47688
1045	low	1	2012-10-23	2012	9	9	1772.05	3.24848	3.65235	9.87654	0	3.34341	1	8.74	10.42	9.66	73.7561	73.5716	74.5203	2.82423	3.0305	2.80601	2.20622	2.15895	3.31418	13.45	16.0833	14.8892	63.2983	70.6833	71.3575	5.58844	5.77977	4.47688
1046	low	1	2012-10-23	2012	9	9	1772.05	3.24848	3.65235	9.87654	0	3.34341	1	8.74	10.42	9.66	73.7561	73.5716	74.5203	2.82423	3.0305	2.80601	2.20622	2.15895	3.31418	13.45	16.0833	14.8892	63.2983	70.6833	71.3575	5.58844	5.77977	4.47688
1047	low	1	2012-10-23	2012	9	9	1772.05	3.24848	3.65235	9.87654	0	3.34341	1	8.74	10.42	9.66	73.7561	73.5716	74.5203	2.82423	3.0305	2.80601	2.20622	2.15895	3.31418	13.45	16.0833	14.8892	63.2983	70.6833	71.3575	5.58844	5.77977	4.47688
1048	low	1	2012-10-23	2012	9	9	1772.05	3.24848	3.65235	9.87654	0	3.34341	1	8.74	10.42	9.66	73.7561	73.5716	74.5203	2.82423	3.0305	2.80601	2.20622	2.15895	3.31418	13.45	16.0833	14.8892	63.2983	70.6833	71.3575	5.58844	5.77977	4.47688
1049	low	1	2012-10-23	2012	9	9	1772.05	3.24848	3.65235	9.87654	0	3.34341	1	8.74	10.42	9.66	73.7561	73.5716	74.5203	2.82423	3.0305	2.80601	2.20622	2.15895	3.31418	13.45	16.0833	14.8892	63.2983	70.6833	71.3575	5.58844	5.77977	4.47688
1050	low	1	2012-10-23	2012	9	9	1772.05	3.24848	3.65235	9.87654	0	3.34341	1	8.74	10.42	9.66	73.7561	73.5716	74.5203	2.82423	3.0305	2.80601	2.20622	2.15895	3.31418	13.45	16.0833	14.8892	63.2983	70.6833	71.3575	5.58844	5.77977	4.47688
1051	low	1	2012-10-23	2012	9	9	1772.05	3.24848	3.65235	9.87654	0	3.34341	1	8.74	10.42	9.66	73.7561	73.5716	74.5203	2.82423	3.0305	2.80601	2.20622	2.15895	3.31418	13.45	16.0833	14.8892	63.2983	70.6833	71.3575	5.58844	5.77977	4.47688
1052	low	1	2012-10-23	2012	9	9	1772.05	3.24848	3.65235	9.87654	0	3.34341	1	8.74	10.42	9.66	73.7561	73.5716	74.5203	2.82423	3.0305	2.80601	2.20622	2.15895	3.31418	13.45	16.0833	14.8892	63.2983	70.6833	71.3575	5.58844	5.77977	4.47688
1053	low	1	2012-10-23	2012	9	9	1772.05	3.24848	3.65235	9.87654	0	3.34341	1	8.74	10.42	9.66	73.7561	73.5716	74.5203	2.82423	3.0305	2.80601	2.20622	2.15895	3.31418	13.45	16.0833	14.8892	63.2983	70.6833	71.3575	5.58844	5.77977	4.47688
1054	low	1	2012-10-23	2012	9	9	1772.05	3.24848	3.65235	9.87654	0	3.34341	1	8.74	10.42	9.66	73.7561	73.5716	74.5203	2.82423	3.0305	2.80601	2.20622	2.15895	3.31418	13.45	16.0833	14.8892	63.2983	70.6833	71.3575	5.58844	5.77977	4.47688
1055	low	1	2012-10-23	2012	9	9	1772.05	3.24848	3.65235	9.87654	0	3.34341	1	8.74	10.42	9.66	73.7561	73.5716	74.5203	2.82423	3.0305	2.80601	2.20622	2.15895	3.31418	13.45	16.0833	14.8892	63.2983	70.6833	71.3575	5.58844	5.77977	4.47688
1056	low	1	2012-10-23	2012	9	9	1772.05	3.24848	3.65235	9.87654	0	3.34341	1	8.74	10.42	9.66	73.7561	73.5716	74.5203	2.82423	3.0305	2.80601	2.20622	2.15895	3.31418	13.45	16.0833	14.8892	63.2983	70.6833	71.3575	5.58844	5.77977	4.47688
1057	low	1	2012-10-23	2012	9	9	1772.05	3.24848	3.65235	9.87654	0	3.34341	1	8.74	10.42	9.66	73.7561	73.5716	74.5203	2.82423	3.0305	2.80601	2.20622	2.15895	3.31418	13.45	16.0833	14.8892	63.2983	70.6833	71.3575	5.58844	5.77977	4.47688
1058	low	1	2012-10-23	2012	9	9	1772.05	3.24848	3.65235	9.87654	0	3.34341	1	8.74	10.42	9.66	73.7561	73.5716	74.5203	2.82423	3.0305	2.80601	2.20622	2.15895	3.31418	13.45	16.0833	14.8892	63.2983	70.6833	71.3575	5.58844	5.77977	4.47688
1059	low	1	2012-10-23	2012	9	9	1772.05	3.24848	3.65235	9.87654	0	3.34341	1	8.74	10.42	9.66	73.7561	73.5716	74.5203	2.82423	3.0305	2.80601	2.20622	2.15895	3.31418	13.45	16.0833	14.8892	63.2983	70.6833	71.3575	5.58844	5.77977	4.47688
1060	low	1	2012-10-23	2012	9	9	1772.05	3.24848	3.65235	9.87654	0	3.34341	1	8.74	10.42	9.66	73.7561	73.5716	74.5203	2.82423	3.0305	2.80601	2.20622	2.15895	3.31418	13.45	16.0833	14.8892	63.2983	70.6833	71.3575	5.58844	5.77977	4.47688
1061	low	1	2012-10-23	2012	9	9	1772.05	3.24848	3.65235	9.87654	0	3.34341	1	8.74	10.42	9.66	73.7561	73.5716	74.5203	2.82423	3.0305	2.80601	2.20622	2.15895	3.31418	13.45	16.0833	14.8892	63.2983	70.6833	71.3575	5.58844	5.77977	4.47688
1062	low	1	2012-10-23	2012	9	9	1772.05	3.24848	3.65235	9.87654	0	3.34341	1	8.74	10.42	9.66	73.7561	73.5716	74.5203	2.82423	3.0305	2.80601	2.20622	2.15895	3.31418	13.45	16.0833	14.8892	63.2983	70.6833	71.3575	5.58844	5.77977	4.47688
1063	low	1	2012-11-21	2012	9	9	1772.05	3.24848	3.65235	9.87654	0	3.33786	1	8.74	10.42	9.66	73.7561	73.5716	74.5203	2.82423	3.0305	2.80601	2.20622	2.15895	3.31418	13.45	16.0833	14.8892	63.2983	70.6833	71.3575	5.58844	5.77977	4.47688
1064	low	1	2012-11-21	2012	9	9	1772.05	3.24848	3.65235	9.87654	0	3.33786	1	8.74	10.42	9.66	73.7561	73.5716	74.5203	2.82423	3.0305	2.80601	2.20622	2.15895	3.31418	13.45	16.0833	14.8892	63.2983	70.6833	71.3575	5.58844	5.77977	4.47688
1065	low	1	2012-11-21	2012	9	9	1772.05	3.24848	3.65235	9.87654	0	3.33786	1	8.74	10.42	9.66	73.7561	73.5716	74.5203	2.82423	3.0305	2.80601	2.20622	2.15895	3.31418	13.45	16.0833	14.8892	63.2983	70.6833	71.3575	5.58844	5.77977	4.47688
1066	low	1	2012-11-21	2012	9	9	1772.05	3.24848	3.65235	9.87654	0	3.33786	1	8.74	10.42	9.66	73.7561	73.5716	74.5203	2.82423	3.0305	2.80601	2.20622	2.15895	3.31418	13.45	16.0833	14.8892	63.2983	70.6833	71.3575	5.58844	5.77977	4.47688
1067	low	1	2012-11-21	2012	9	9	1772.05	3.24848	3.65235	9.87654	0	3.33786	1	8.74	10.42	9.66	73.7561	73.5716	74.5203	2.82423	3.0305	2.80601	2.20622	2.15895	3.31418	13.45	16.0833	14.8892	63.2983	70.6833	71.3575	5.58844	5.77977	4.47688
1068	low	1	2012-11-21	2012	9	9	1772.05	3.24848	3.65235	9.87654	0	3.33786	1	8.74	10.42	9.66	73.7561	73.5716	74.5203	2.82423	3.0305	2.80601	2.20622	2.15895	3.31418	13.45	16.0833	14.8892	63.2983	70.6833	71.3575	5.58844	5.77977	4.47688
1069	low	1	2012-11-21	2012	9	9	1772.05	3.24848	3.65235	9.87654	0	3.33786	1	8.74	10.42	9.66	73.7561	73.5716	74.5203	2.82423	3.0305	2.80601	2.20622	2.15895	3.31418	13.45	16.0833	14.8892	63.2983	70.6833	71.3575	5.58844	5.77977	4.47688
1070	low	1	2012-11-21	2012	9	9	1772.05	3.24848	3.65235	9.87654	0	3.33786	1	8.74	10.42	9.66	73.7561	73.5716	74.5203	2.82423	3.0305	2.80601	2.20622	2.15895	3.31418	13.45	16.0833	14.8892	63.2983	70.6833	71.3575	5.58844	5.77977	4.47688
1071	low	1	2012-11-21	2012	9	9	1772.05	3.24848	3.65235	9.87654	0	3.33786	1	8.74	10.42	9.66	73.7561	73.5716	74.5203	2.82423	3.0305	2.80601	2.20622	2.15895	3.31418	13.45	16.0833	14.8892	63.2983	70.6833	71.3575	5.58844	5.77977	4.47688
1072	low	1	2012-11-21	2012	9	9	1772.05	3.24848	3.65235	9.87654	0	3.33786	1	8.74	10.42	9.66	73.7561	73.5716	74.5203	2.82423	3.0305	2.80601	2.20622	2.15895	3.31418	13.45	16.0833	14.8892	63.2983	70.6833	71.3575	5.58844	5.77977	4.47688
1073	low	1	2012-11-21	2012	9	9	1772.05	3.24848	3.65235	9.87654	0	3.33786	1	8.74	10.42	9.66	73.7561	73.5716	74.5203	2.82423	3.0305	2.80601	2.20622	2.15895	3.31418	13.45	16.0833	14.8892	63.2983	70.6833	71.3575	5.58844	5.77977	4.47688
1074	low	1	2012-11-21	2012	9	9	1772.05	3.24848	3.65235	9.87654	0	3.33786	1	8.74	10.42	9.66	73.7561	73.5716	74.5203	2.82423	3.0305	2.80601	2.20622	2.15895	3.31418	13.45	16.0833	14.8892	63.2983	70.6833	71.3575	5.58844	5.77977	4.47688
1075	low	1	2012-11-21	2012	9	9	1772.05	3.24848	3.65235	9.87654	0	3.33786	1	8.74	10.42	9.66	73.7561	73.5716	74.5203	2.82423	3.0305	2.80601	2.20622	2.15895	3.31418	13.45	16.0833	14.8892	63.2983	70.6833	71.3575	5.58844	5.77977	4.47688
1076	low	1	2012-11-21	2012	9	9	1772.05	3.24848	3.65235	9.87654	0	3.33786	1	8.74	10.42	9.66	73.7561	73.5716	74.5203	2.82423	3.0305	2.80601	2.20622	2.15895	3.31418	13.45	16.0833	14.8892	63.2983	70.6833	71.3575	5.58844	5.77977	4.47688
1077	low	1	2012-11-21	2012	9	9	1772.05	3.24848	3.65235	9.87654	0	3.33786	1	8.74	10.42	9.66	73.7561	73.5716	74.5203	2.82423	3.0305	2.80601	2.20622	2.15895	3.31418	13.45	16.0833	14.8892	63.2983	70.6833	71.3575	5.58844	5.77977	4.47688
1078	low	1	2012-11-21	2012	9	9	1772.05	3.24848	3.65235	9.87654	0	3.33786	1	8.74	10.42	9.66	73.7561	73.5716	74.5203	2.82423	3.0305	2.80601	2.20622	2.15895	3.31418	13.45	16.0833	14.8892	63.2983	70.6833	71.3575	5.58844	5.77977	4.47688
1079	low	1	2013-04-24	2013	10	10	1333.95	3.12514	3.24848	7.79221	0	3.30707	5	10.42	9.66	9.08	73.5716	74.5203	76.1685	3.0305	2.80601	2.64845	2.15895	3.31418	3.11293	16.0833	14.8892	12.8083	70.6833	71.3575	65.6417	5.77977	4.47688	5.24608
1080	low	1	2013-04-24	2013	10	10	1333.95	3.12514	3.24848	7.79221	1	3.30707	5	10.42	9.66	9.08	73.5716	74.5203	76.1685	3.0305	2.80601	2.64845	2.15895	3.31418	3.11293	16.0833	14.8892	12.8083	70.6833	71.3575	65.6417	5.77977	4.47688	5.24608
1081	low	1	2013-04-24	2013	10	10	1333.95	3.12514	3.24848	7.79221	1	3.30707	5	10.42	9.66	9.08	73.5716	74.5203	76.1685	3.0305	2.80601	2.64845	2.15895	3.31418	3.11293	16.0833	14.8892	12.8083	70.6833	71.3575	65.6417	5.77977	4.47688	5.24608
1082	low	1	2013-04-24	2013	10	10	1333.95	3.12514	3.24848	7.79221	0	3.30707	5	10.42	9.66	9.08	73.5716	74.5203	76.1685	3.0305	2.80601	2.64845	2.15895	3.31418	3.11293	16.0833	14.8892	12.8083	70.6833	71.3575	65.6417	5.77977	4.47688	5.24608
1083	low	1	2013-04-24	2013	10	10	1333.95	3.12514	3.24848	7.79221	0	3.30707	5	10.42	9.66	9.08	73.5716	74.5203	76.1685	3.0305	2.80601	2.64845	2.15895	3.31418	3.11293	16.0833	14.8892	12.8083	70.6833	71.3575	65.6417	5.77977	4.47688	5.24608
1084	low	1	2013-04-24	2013	10	10	1333.95	3.12514	3.24848	7.79221	0	3.30707	5	10.42	9.66	9.08	73.5716	74.5203	76.1685	3.0305	2.80601	2.64845	2.15895	3.31418	3.11293	16.0833	14.8892	12.8083	70.6833	71.3575	65.6417	5.77977	4.47688	5.24608
1085	low	1	2013-04-24	2013	10	10	1333.95	3.12514	3.24848	7.79221	0	3.30707	5	10.42	9.66	9.08	73.5716	74.5203	76.1685	3.0305	2.80601	2.64845	2.15895	3.31418	3.11293	16.0833	14.8892	12.8083	70.6833	71.3575	65.6417	5.77977	4.47688	5.24608
1086	low	1	2013-04-24	2013	10	10	1333.95	3.12514	3.24848	7.79221	0	3.30707	5	10.42	9.66	9.08	73.5716	74.5203	76.1685	3.0305	2.80601	2.64845	2.15895	3.31418	3.11293	16.0833	14.8892	12.8083	70.6833	71.3575	65.6417	5.77977	4.47688	5.24608
1087	low	1	2013-04-24	2013	10	10	1333.95	3.12514	3.24848	7.79221	0	3.30707	5	10.42	9.66	9.08	73.5716	74.5203	76.1685	3.0305	2.80601	2.64845	2.15895	3.31418	3.11293	16.0833	14.8892	12.8083	70.6833	71.3575	65.6417	5.77977	4.47688	5.24608
1088	low	1	2013-04-24	2013	10	10	1333.95	3.12514	3.24848	7.79221	0	3.30707	5	10.42	9.66	9.08	73.5716	74.5203	76.1685	3.0305	2.80601	2.64845	2.15895	3.31418	3.11293	16.0833	14.8892	12.8083	70.6833	71.3575	65.6417	5.77977	4.47688	5.24608
1089	low	1	2013-04-24	2013	10	10	1333.95	3.12514	3.24848	7.79221	0	3.30707	5	10.42	9.66	9.08	73.5716	74.5203	76.1685	3.0305	2.80601	2.64845	2.15895	3.31418	3.11293	16.0833	14.8892	12.8083	70.6833	71.3575	65.6417	5.77977	4.47688	5.24608
1090	low	1	2013-04-24	2013	10	10	1333.95	3.12514	3.24848	7.79221	0	3.30707	5	10.42	9.66	9.08	73.5716	74.5203	76.1685	3.0305	2.80601	2.64845	2.15895	3.31418	3.11293	16.0833	14.8892	12.8083	70.6833	71.3575	65.6417	5.77977	4.47688	5.24608
1091	low	1	2013-04-24	2013	10	10	1333.95	3.12514	3.24848	7.79221	0	3.30707	5	10.42	9.66	9.08	73.5716	74.5203	76.1685	3.0305	2.80601	2.64845	2.15895	3.31418	3.11293	16.0833	14.8892	12.8083	70.6833	71.3575	65.6417	5.77977	4.47688	5.24608
1092	low	1	2013-04-24	2013	10	10	1333.95	3.12514	3.24848	7.79221	0	3.30707	5	10.42	9.66	9.08	73.5716	74.5203	76.1685	3.0305	2.80601	2.64845	2.15895	3.31418	3.11293	16.0833	14.8892	12.8083	70.6833	71.3575	65.6417	5.77977	4.47688	5.24608
1093	low	1	2013-04-24	2013	10	10	1333.95	3.12514	3.24848	7.79221	0	3.30707	5	10.42	9.66	9.08	73.5716	74.5203	76.1685	3.0305	2.80601	2.64845	2.15895	3.31418	3.11293	16.0833	14.8892	12.8083	70.6833	71.3575	65.6417	5.77977	4.47688	5.24608
1094	low	1	2013-04-24	2013	10	10	1333.95	3.12514	3.24848	7.79221	0	3.30707	5	10.42	9.66	9.08	73.5716	74.5203	76.1685	3.0305	2.80601	2.64845	2.15895	3.31418	3.11293	16.0833	14.8892	12.8083	70.6833	71.3575	65.6417	5.77977	4.47688	5.24608
1095	low	1	2013-04-24	2013	10	10	1333.95	3.12514	3.24848	7.79221	0	3.30707	5	10.42	9.66	9.08	73.5716	74.5203	76.1685	3.0305	2.80601	2.64845	2.15895	3.31418	3.11293	16.0833	14.8892	12.8083	70.6833	71.3575	65.6417	5.77977	4.47688	5.24608
1096	low	1	2013-04-24	2013	10	10	1333.95	3.12514	3.24848	7.79221	0	3.30707	5	10.42	9.66	9.08	73.5716	74.5203	76.1685	3.0305	2.80601	2.64845	2.15895	3.31418	3.11293	16.0833	14.8892	12.8083	70.6833	71.3575	65.6417	5.77977	4.47688	5.24608
1097	low	1	2013-04-24	2013	10	10	1333.95	3.12514	3.24848	7.79221	0	3.30707	5	10.42	9.66	9.08	73.5716	74.5203	76.1685	3.0305	2.80601	2.64845	2.15895	3.31418	3.11293	16.0833	14.8892	12.8083	70.6833	71.3575	65.6417	5.77977	4.47688	5.24608
1098	low	1	2013-04-24	2013	10	10	1333.95	3.12514	3.24848	7.79221	0	3.30707	5	10.42	9.66	9.08	73.5716	74.5203	76.1685	3.0305	2.80601	2.64845	2.15895	3.31418	3.11293	16.0833	14.8892	12.8083	70.6833	71.3575	65.6417	5.77977	4.47688	5.24608
1099	low	1	2013-05-28	2013	10	10	1333.95	3.12514	3.24848	7.79221	0	3.30298	5	10.42	9.66	9.08	73.5716	74.5203	76.1685	3.0305	2.80601	2.64845	2.15895	3.31418	3.11293	16.0833	14.8892	12.8083	70.6833	71.3575	65.6417	5.77977	4.47688	5.24608
1100	low	1	2013-05-28	2013	10	10	1333.95	3.12514	3.24848	7.79221	0	3.30298	5	10.42	9.66	9.08	73.5716	74.5203	76.1685	3.0305	2.80601	2.64845	2.15895	3.31418	3.11293	16.0833	14.8892	12.8083	70.6833	71.3575	65.6417	5.77977	4.47688	5.24608
1101	low	1	2013-05-28	2013	10	10	1333.95	3.12514	3.24848	7.79221	0	3.30298	5	10.42	9.66	9.08	73.5716	74.5203	76.1685	3.0305	2.80601	2.64845	2.15895	3.31418	3.11293	16.0833	14.8892	12.8083	70.6833	71.3575	65.6417	5.77977	4.47688	5.24608
1102	low	1	2013-05-28	2013	10	10	1333.95	3.12514	3.24848	7.79221	0	3.30298	5	10.42	9.66	9.08	73.5716	74.5203	76.1685	3.0305	2.80601	2.64845	2.15895	3.31418	3.11293	16.0833	14.8892	12.8083	70.6833	71.3575	65.6417	5.77977	4.47688	5.24608
1103	low	1	2013-05-28	2013	10	10	1333.95	3.12514	3.24848	7.79221	0	3.30298	5	10.42	9.66	9.08	73.5716	74.5203	76.1685	3.0305	2.80601	2.64845	2.15895	3.31418	3.11293	16.0833	14.8892	12.8083	70.6833	71.3575	65.6417	5.77977	4.47688	5.24608
1104	low	1	2013-05-28	2013	10	10	1333.95	3.12514	3.24848	7.79221	0	3.30298	5	10.42	9.66	9.08	73.5716	74.5203	76.1685	3.0305	2.80601	2.64845	2.15895	3.31418	3.11293	16.0833	14.8892	12.8083	70.6833	71.3575	65.6417	5.77977	4.47688	5.24608
1105	low	1	2013-05-28	2013	10	10	1333.95	3.12514	3.24848	7.79221	0	3.30298	5	10.42	9.66	9.08	73.5716	74.5203	76.1685	3.0305	2.80601	2.64845	2.15895	3.31418	3.11293	16.0833	14.8892	12.8083	70.6833	71.3575	65.6417	5.77977	4.47688	5.24608
1106	low	1	2013-05-28	2013	10	10	1333.95	3.12514	3.24848	7.79221	0	3.30298	5	10.42	9.66	9.08	73.5716	74.5203	76.1685	3.0305	2.80601	2.64845	2.15895	3.31418	3.11293	16.0833	14.8892	12.8083	70.6833	71.3575	65.6417	5.77977	4.47688	5.24608
1107	low	1	2013-05-28	2013	10	10	1333.95	3.12514	3.24848	7.79221	0	3.30298	5	10.42	9.66	9.08	73.5716	74.5203	76.1685	3.0305	2.80601	2.64845	2.15895	3.31418	3.11293	16.0833	14.8892	12.8083	70.6833	71.3575	65.6417	5.77977	4.47688	5.24608
1108	low	1	2013-05-28	2013	10	10	1333.95	3.12514	3.24848	7.79221	0	3.30298	5	10.42	9.66	9.08	73.5716	74.5203	76.1685	3.0305	2.80601	2.64845	2.15895	3.31418	3.11293	16.0833	14.8892	12.8083	70.6833	71.3575	65.6417	5.77977	4.47688	5.24608
1109	low	1	2013-05-28	2013	10	10	1333.95	3.12514	3.24848	7.79221	0	3.30298	5	10.42	9.66	9.08	73.5716	74.5203	76.1685	3.0305	2.80601	2.64845	2.15895	3.31418	3.11293	16.0833	14.8892	12.8083	70.6833	71.3575	65.6417	5.77977	4.47688	5.24608
1110	low	1	2013-05-28	2013	10	10	1333.95	3.12514	3.24848	7.79221	0	3.30298	5	10.42	9.66	9.08	73.5716	74.5203	76.1685	3.0305	2.80601	2.64845	2.15895	3.31418	3.11293	16.0833	14.8892	12.8083	70.6833	71.3575	65.6417	5.77977	4.47688	5.24608
1111	low	1	2013-05-28	2013	10	10	1333.95	3.12514	3.24848	7.79221	0	3.30298	5	10.42	9.66	9.08	73.5716	74.5203	76.1685	3.0305	2.80601	2.64845	2.15895	3.31418	3.11293	16.0833	14.8892	12.8083	70.6833	71.3575	65.6417	5.77977	4.47688	5.24608
1112	low	1	2013-05-28	2013	10	10	1333.95	3.12514	3.24848	7.79221	0	3.30298	5	10.42	9.66	9.08	73.5716	74.5203	76.1685	3.0305	2.80601	2.64845	2.15895	3.31418	3.11293	16.0833	14.8892	12.8083	70.6833	71.3575	65.6417	5.77977	4.47688	5.24608
1113	low	1	2013-05-28	2013	10	10	1333.95	3.12514	3.24848	7.79221	0	3.30298	5	10.42	9.66	9.08	73.5716	74.5203	76.1685	3.0305	2.80601	2.64845	2.15895	3.31418	3.11293	16.0833	14.8892	12.8083	70.6833	71.3575	65.6417	5.77977	4.47688	5.24608
1114	low	1	2013-05-28	2013	10	10	1333.95	3.12514	3.24848	7.79221	0	3.30298	5	10.42	9.66	9.08	73.5716	74.5203	76.1685	3.0305	2.80601	2.64845	2.15895	3.31418	3.11293	16.0833	14.8892	12.8083	70.6833	71.3575	65.6417	5.77977	4.47688	5.24608
1115	low	1	2013-05-28	2013	10	10	1333.95	3.12514	3.24848	7.79221	0	3.30298	5	10.42	9.66	9.08	73.5716	74.5203	76.1685	3.0305	2.80601	2.64845	2.15895	3.31418	3.11293	16.0833	14.8892	12.8083	70.6833	71.3575	65.6417	5.77977	4.47688	5.24608
1116	low	1	2013-05-28	2013	10	10	1333.95	3.12514	3.24848	7.79221	0	3.30298	5	10.42	9.66	9.08	73.5716	74.5203	76.1685	3.0305	2.80601	2.64845	2.15895	3.31418	3.11293	16.0833	14.8892	12.8083	70.6833	71.3575	65.6417	5.77977	4.47688	5.24608
1117	low	1	2013-05-28	2013	10	10	1333.95	3.12514	3.24848	7.79221	0	3.30298	5	10.42	9.66	9.08	73.5716	74.5203	76.1685	3.0305	2.80601	2.64845	2.15895	3.31418	3.11293	16.0833	14.8892	12.8083	70.6833	71.3575	65.6417	5.77977	4.47688	5.24608
1118	low	1	2013-05-28	2013	10	10	1333.95	3.12514	3.24848	7.79221	0	3.30298	5	10.42	9.66	9.08	73.5716	74.5203	76.1685	3.0305	2.80601	2.64845	2.15895	3.31418	3.11293	16.0833	14.8892	12.8083	70.6833	71.3575	65.6417	5.77977	4.47688	5.24608
1119	low	1	2013-06-28	2013	10	10	1333.95	3.12514	3.24848	7.79221	0	3.29776	5	10.42	9.66	9.08	73.5716	74.5203	76.1685	3.0305	2.80601	2.64845	2.15895	3.31418	3.11293	16.0833	14.8892	12.8083	70.6833	71.3575	65.6417	5.77977	4.47688	5.24608
1120	low	1	2013-06-28	2013	10	10	1333.95	3.12514	3.24848	7.79221	0	3.29776	5	10.42	9.66	9.08	73.5716	74.5203	76.1685	3.0305	2.80601	2.64845	2.15895	3.31418	3.11293	16.0833	14.8892	12.8083	70.6833	71.3575	65.6417	5.77977	4.47688	5.24608
1121	low	1	2013-06-28	2013	10	10	1333.95	3.12514	3.24848	7.79221	0	3.29776	5	10.42	9.66	9.08	73.5716	74.5203	76.1685	3.0305	2.80601	2.64845	2.15895	3.31418	3.11293	16.0833	14.8892	12.8083	70.6833	71.3575	65.6417	5.77977	4.47688	5.24608
1122	low	1	2013-06-28	2013	10	10	1333.95	3.12514	3.24848	7.79221	0	3.29776	5	10.42	9.66	9.08	73.5716	74.5203	76.1685	3.0305	2.80601	2.64845	2.15895	3.31418	3.11293	16.0833	14.8892	12.8083	70.6833	71.3575	65.6417	5.77977	4.47688	5.24608
1123	low	1	2013-06-28	2013	10	10	1333.95	3.12514	3.24848	7.79221	0	3.29776	5	10.42	9.66	9.08	73.5716	74.5203	76.1685	3.0305	2.80601	2.64845	2.15895	3.31418	3.11293	16.0833	14.8892	12.8083	70.6833	71.3575	65.6417	5.77977	4.47688	5.24608
1124	low	1	2013-06-28	2013	10	10	1333.95	3.12514	3.24848	7.79221	0	3.29776	5	10.42	9.66	9.08	73.5716	74.5203	76.1685	3.0305	2.80601	2.64845	2.15895	3.31418	3.11293	16.0833	14.8892	12.8083	70.6833	71.3575	65.6417	5.77977	4.47688	5.24608
1125	low	1	2013-06-28	2013	10	10	1333.95	3.12514	3.24848	7.79221	0	3.29776	5	10.42	9.66	9.08	73.5716	74.5203	76.1685	3.0305	2.80601	2.64845	2.15895	3.31418	3.11293	16.0833	14.8892	12.8083	70.6833	71.3575	65.6417	5.77977	4.47688	5.24608
1126	low	1	2013-06-28	2013	10	10	1333.95	3.12514	3.24848	7.79221	0	3.29776	5	10.42	9.66	9.08	73.5716	74.5203	76.1685	3.0305	2.80601	2.64845	2.15895	3.31418	3.11293	16.0833	14.8892	12.8083	70.6833	71.3575	65.6417	5.77977	4.47688	5.24608
1127	low	1	2013-06-28	2013	10	10	1333.95	3.12514	3.24848	7.79221	0	3.29776	5	10.42	9.66	9.08	73.5716	74.5203	76.1685	3.0305	2.80601	2.64845	2.15895	3.31418	3.11293	16.0833	14.8892	12.8083	70.6833	71.3575	65.6417	5.77977	4.47688	5.24608
1128	low	1	2013-06-28	2013	10	10	1333.95	3.12514	3.24848	7.79221	0	3.29776	5	10.42	9.66	9.08	73.5716	74.5203	76.1685	3.0305	2.80601	2.64845	2.15895	3.31418	3.11293	16.0833	14.8892	12.8083	70.6833	71.3575	65.6417	5.77977	4.47688	5.24608
1129	low	1	2013-06-28	2013	10	10	1333.95	3.12514	3.24848	7.79221	0	3.29776	5	10.42	9.66	9.08	73.5716	74.5203	76.1685	3.0305	2.80601	2.64845	2.15895	3.31418	3.11293	16.0833	14.8892	12.8083	70.6833	71.3575	65.6417	5.77977	4.47688	5.24608
1130	low	1	2013-06-28	2013	10	10	1333.95	3.12514	3.24848	7.79221	0	3.29776	5	10.42	9.66	9.08	73.5716	74.5203	76.1685	3.0305	2.80601	2.64845	2.15895	3.31418	3.11293	16.0833	14.8892	12.8083	70.6833	71.3575	65.6417	5.77977	4.47688	5.24608
1131	low	1	2013-06-28	2013	10	10	1333.95	3.12514	3.24848	7.79221	0	3.29776	5	10.42	9.66	9.08	73.5716	74.5203	76.1685	3.0305	2.80601	2.64845	2.15895	3.31418	3.11293	16.0833	14.8892	12.8083	70.6833	71.3575	65.6417	5.77977	4.47688	5.24608
1132	low	1	2013-06-28	2013	10	10	1333.95	3.12514	3.24848	7.79221	0	3.29776	5	10.42	9.66	9.08	73.5716	74.5203	76.1685	3.0305	2.80601	2.64845	2.15895	3.31418	3.11293	16.0833	14.8892	12.8083	70.6833	71.3575	65.6417	5.77977	4.47688	5.24608
1133	low	1	2013-06-28	2013	10	10	1333.95	3.12514	3.24848	7.79221	0	3.29776	5	10.42	9.66	9.08	73.5716	74.5203	76.1685	3.0305	2.80601	2.64845	2.15895	3.31418	3.11293	16.0833	14.8892	12.8083	70.6833	71.3575	65.6417	5.77977	4.47688	5.24608
1134	low	1	2013-06-28	2013	10	10	1333.95	3.12514	3.24848	7.79221	0	3.29776	5	10.42	9.66	9.08	73.5716	74.5203	76.1685	3.0305	2.80601	2.64845	2.15895	3.31418	3.11293	16.0833	14.8892	12.8083	70.6833	71.3575	65.6417	5.77977	4.47688	5.24608
1135	low	1	2013-06-28	2013	10	10	1333.95	3.12514	3.24848	7.79221	0	3.29776	5	10.42	9.66	9.08	73.5716	74.5203	76.1685	3.0305	2.80601	2.64845	2.15895	3.31418	3.11293	16.0833	14.8892	12.8083	70.6833	71.3575	65.6417	5.77977	4.47688	5.24608
1136	low	1	2013-06-28	2013	10	10	1333.95	3.12514	3.24848	7.79221	0	3.29776	5	10.42	9.66	9.08	73.5716	74.5203	76.1685	3.0305	2.80601	2.64845	2.15895	3.31418	3.11293	16.0833	14.8892	12.8083	70.6833	71.3575	65.6417	5.77977	4.47688	5.24608
1137	low	1	2013-06-28	2013	10	10	1333.95	3.12514	3.24848	7.79221	0	3.29776	5	10.42	9.66	9.08	73.5716	74.5203	76.1685	3.0305	2.80601	2.64845	2.15895	3.31418	3.11293	16.0833	14.8892	12.8083	70.6833	71.3575	65.6417	5.77977	4.47688	5.24608
1138	low	1	2013-06-28	2013	10	10	1333.95	3.12514	3.24848	7.79221	0	3.29776	5	10.42	9.66	9.08	73.5716	74.5203	76.1685	3.0305	2.80601	2.64845	2.15895	3.31418	3.11293	16.0833	14.8892	12.8083	70.6833	71.3575	65.6417	5.77977	4.47688	5.24608
1139	low	1	2013-07-23	2013	10	10	1333.95	3.12514	3.24848	7.79221	0	3.29358	5	10.42	9.66	9.08	73.5716	74.5203	76.1685	3.0305	2.80601	2.64845	2.15895	3.31418	3.11293	16.0833	14.8892	12.8083	70.6833	71.3575	65.6417	5.77977	4.47688	5.24608
1140	low	1	2013-07-23	2013	10	10	1333.95	3.12514	3.24848	7.79221	0	3.29358	5	10.42	9.66	9.08	73.5716	74.5203	76.1685	3.0305	2.80601	2.64845	2.15895	3.31418	3.11293	16.0833	14.8892	12.8083	70.6833	71.3575	65.6417	5.77977	4.47688	5.24608
1141	low	1	2013-07-23	2013	10	10	1333.95	3.12514	3.24848	7.79221	0	3.29358	5	10.42	9.66	9.08	73.5716	74.5203	76.1685	3.0305	2.80601	2.64845	2.15895	3.31418	3.11293	16.0833	14.8892	12.8083	70.6833	71.3575	65.6417	5.77977	4.47688	5.24608
1142	low	1	2013-07-23	2013	10	10	1333.95	3.12514	3.24848	7.79221	0	3.29358	5	10.42	9.66	9.08	73.5716	74.5203	76.1685	3.0305	2.80601	2.64845	2.15895	3.31418	3.11293	16.0833	14.8892	12.8083	70.6833	71.3575	65.6417	5.77977	4.47688	5.24608
1143	low	1	2013-07-23	2013	10	10	1333.95	3.12514	3.24848	7.79221	0	3.29358	5	10.42	9.66	9.08	73.5716	74.5203	76.1685	3.0305	2.80601	2.64845	2.15895	3.31418	3.11293	16.0833	14.8892	12.8083	70.6833	71.3575	65.6417	5.77977	4.47688	5.24608
1144	low	1	2013-07-23	2013	10	10	1333.95	3.12514	3.24848	7.79221	0	3.29358	5	10.42	9.66	9.08	73.5716	74.5203	76.1685	3.0305	2.80601	2.64845	2.15895	3.31418	3.11293	16.0833	14.8892	12.8083	70.6833	71.3575	65.6417	5.77977	4.47688	5.24608
1145	low	1	2013-07-23	2013	10	10	1333.95	3.12514	3.24848	7.79221	0	3.29358	5	10.42	9.66	9.08	73.5716	74.5203	76.1685	3.0305	2.80601	2.64845	2.15895	3.31418	3.11293	16.0833	14.8892	12.8083	70.6833	71.3575	65.6417	5.77977	4.47688	5.24608
1146	low	1	2013-07-23	2013	10	10	1333.95	3.12514	3.24848	7.79221	0	3.29358	5	10.42	9.66	9.08	73.5716	74.5203	76.1685	3.0305	2.80601	2.64845	2.15895	3.31418	3.11293	16.0833	14.8892	12.8083	70.6833	71.3575	65.6417	5.77977	4.47688	5.24608
1147	low	1	2013-07-23	2013	10	10	1333.95	3.12514	3.24848	7.79221	0	3.29358	5	10.42	9.66	9.08	73.5716	74.5203	76.1685	3.0305	2.80601	2.64845	2.15895	3.31418	3.11293	16.0833	14.8892	12.8083	70.6833	71.3575	65.6417	5.77977	4.47688	5.24608
1148	low	1	2013-07-23	2013	10	10	1333.95	3.12514	3.24848	7.79221	0	3.29358	5	10.42	9.66	9.08	73.5716	74.5203	76.1685	3.0305	2.80601	2.64845	2.15895	3.31418	3.11293	16.0833	14.8892	12.8083	70.6833	71.3575	65.6417	5.77977	4.47688	5.24608
1149	low	1	2013-07-23	2013	10	10	1333.95	3.12514	3.24848	7.79221	0	3.29358	5	10.42	9.66	9.08	73.5716	74.5203	76.1685	3.0305	2.80601	2.64845	2.15895	3.31418	3.11293	16.0833	14.8892	12.8083	70.6833	71.3575	65.6417	5.77977	4.47688	5.24608
1150	low	1	2013-07-23	2013	10	10	1333.95	3.12514	3.24848	7.79221	0	3.29358	5	10.42	9.66	9.08	73.5716	74.5203	76.1685	3.0305	2.80601	2.64845	2.15895	3.31418	3.11293	16.0833	14.8892	12.8083	70.6833	71.3575	65.6417	5.77977	4.47688	5.24608
1151	low	1	2013-07-23	2013	10	10	1333.95	3.12514	3.24848	7.79221	0	3.29358	5	10.42	9.66	9.08	73.5716	74.5203	76.1685	3.0305	2.80601	2.64845	2.15895	3.31418	3.11293	16.0833	14.8892	12.8083	70.6833	71.3575	65.6417	5.77977	4.47688	5.24608
1152	low	1	2013-07-23	2013	10	10	1333.95	3.12514	3.24848	7.79221	0	3.29358	5	10.42	9.66	9.08	73.5716	74.5203	76.1685	3.0305	2.80601	2.64845	2.15895	3.31418	3.11293	16.0833	14.8892	12.8083	70.6833	71.3575	65.6417	5.77977	4.47688	5.24608
1153	low	1	2013-07-23	2013	10	10	1333.95	3.12514	3.24848	7.79221	0	3.29358	5	10.42	9.66	9.08	73.5716	74.5203	76.1685	3.0305	2.80601	2.64845	2.15895	3.31418	3.11293	16.0833	14.8892	12.8083	70.6833	71.3575	65.6417	5.77977	4.47688	5.24608
1154	low	1	2013-07-23	2013	10	10	1333.95	3.12514	3.24848	7.79221	0	3.29358	5	10.42	9.66	9.08	73.5716	74.5203	76.1685	3.0305	2.80601	2.64845	2.15895	3.31418	3.11293	16.0833	14.8892	12.8083	70.6833	71.3575	65.6417	5.77977	4.47688	5.24608
1155	low	1	2013-07-23	2013	10	10	1333.95	3.12514	3.24848	7.79221	0	3.29358	5	10.42	9.66	9.08	73.5716	74.5203	76.1685	3.0305	2.80601	2.64845	2.15895	3.31418	3.11293	16.0833	14.8892	12.8083	70.6833	71.3575	65.6417	5.77977	4.47688	5.24608
1156	low	1	2013-07-23	2013	10	10	1333.95	3.12514	3.24848	7.79221	0	3.29358	5	10.42	9.66	9.08	73.5716	74.5203	76.1685	3.0305	2.80601	2.64845	2.15895	3.31418	3.11293	16.0833	14.8892	12.8083	70.6833	71.3575	65.6417	5.77977	4.47688	5.24608
1157	low	1	2013-07-23	2013	10	10	1333.95	3.12514	3.24848	7.79221	0	3.29358	5	10.42	9.66	9.08	73.5716	74.5203	76.1685	3.0305	2.80601	2.64845	2.15895	3.31418	3.11293	16.0833	14.8892	12.8083	70.6833	71.3575	65.6417	5.77977	4.47688	5.24608
1158	low	1	2013-07-23	2013	10	10	1333.95	3.12514	3.24848	7.79221	0	3.29358	5	10.42	9.66	9.08	73.5716	74.5203	76.1685	3.0305	2.80601	2.64845	2.15895	3.31418	3.11293	16.0833	14.8892	12.8083	70.6833	71.3575	65.6417	5.77977	4.47688	5.24608
1159	low	1	2013-08-22	2013	10	10	1333.95	3.12514	3.24848	7.79221	0	3.28735	5	10.42	9.66	9.08	73.5716	74.5203	76.1685	3.0305	2.80601	2.64845	2.15895	3.31418	3.11293	16.0833	14.8892	12.8083	70.6833	71.3575	65.6417	5.77977	4.47688	5.24608
1160	low	1	2013-08-22	2013	10	10	1333.95	3.12514	3.24848	7.79221	0	3.28735	5	10.42	9.66	9.08	73.5716	74.5203	76.1685	3.0305	2.80601	2.64845	2.15895	3.31418	3.11293	16.0833	14.8892	12.8083	70.6833	71.3575	65.6417	5.77977	4.47688	5.24608
1161	low	1	2013-08-22	2013	10	10	1333.95	3.12514	3.24848	7.79221	0	3.28735	5	10.42	9.66	9.08	73.5716	74.5203	76.1685	3.0305	2.80601	2.64845	2.15895	3.31418	3.11293	16.0833	14.8892	12.8083	70.6833	71.3575	65.6417	5.77977	4.47688	5.24608
1162	low	1	2013-08-22	2013	10	10	1333.95	3.12514	3.24848	7.79221	1	3.28735	5	10.42	9.66	9.08	73.5716	74.5203	76.1685	3.0305	2.80601	2.64845	2.15895	3.31418	3.11293	16.0833	14.8892	12.8083	70.6833	71.3575	65.6417	5.77977	4.47688	5.24608
1163	low	1	2013-08-22	2013	10	10	1333.95	3.12514	3.24848	7.79221	0	3.28735	5	10.42	9.66	9.08	73.5716	74.5203	76.1685	3.0305	2.80601	2.64845	2.15895	3.31418	3.11293	16.0833	14.8892	12.8083	70.6833	71.3575	65.6417	5.77977	4.47688	5.24608
1164	low	1	2013-08-22	2013	10	10	1333.95	3.12514	3.24848	7.79221	1	3.28735	5	10.42	9.66	9.08	73.5716	74.5203	76.1685	3.0305	2.80601	2.64845	2.15895	3.31418	3.11293	16.0833	14.8892	12.8083	70.6833	71.3575	65.6417	5.77977	4.47688	5.24608
1165	low	1	2013-08-22	2013	10	10	1333.95	3.12514	3.24848	7.79221	0	3.28735	5	10.42	9.66	9.08	73.5716	74.5203	76.1685	3.0305	2.80601	2.64845	2.15895	3.31418	3.11293	16.0833	14.8892	12.8083	70.6833	71.3575	65.6417	5.77977	4.47688	5.24608
1166	low	1	2013-08-22	2013	10	10	1333.95	3.12514	3.24848	7.79221	0	3.28735	5	10.42	9.66	9.08	73.5716	74.5203	76.1685	3.0305	2.80601	2.64845	2.15895	3.31418	3.11293	16.0833	14.8892	12.8083	70.6833	71.3575	65.6417	5.77977	4.47688	5.24608
1167	low	1	2013-08-22	2013	10	10	1333.95	3.12514	3.24848	7.79221	0	3.28735	5	10.42	9.66	9.08	73.5716	74.5203	76.1685	3.0305	2.80601	2.64845	2.15895	3.31418	3.11293	16.0833	14.8892	12.8083	70.6833	71.3575	65.6417	5.77977	4.47688	5.24608
1168	low	1	2013-08-22	2013	10	10	1333.95	3.12514	3.24848	7.79221	0	3.28735	5	10.42	9.66	9.08	73.5716	74.5203	76.1685	3.0305	2.80601	2.64845	2.15895	3.31418	3.11293	16.0833	14.8892	12.8083	70.6833	71.3575	65.6417	5.77977	4.47688	5.24608
1169	low	1	2013-08-22	2013	10	10	1333.95	3.12514	3.24848	7.79221	0	3.28735	5	10.42	9.66	9.08	73.5716	74.5203	76.1685	3.0305	2.80601	2.64845	2.15895	3.31418	3.11293	16.0833	14.8892	12.8083	70.6833	71.3575	65.6417	5.77977	4.47688	5.24608
1170	low	1	2013-08-22	2013	10	10	1333.95	3.12514	3.24848	7.79221	0	3.28735	5	10.42	9.66	9.08	73.5716	74.5203	76.1685	3.0305	2.80601	2.64845	2.15895	3.31418	3.11293	16.0833	14.8892	12.8083	70.6833	71.3575	65.6417	5.77977	4.47688	5.24608
1171	low	1	2013-08-22	2013	10	10	1333.95	3.12514	3.24848	7.79221	0	3.28735	5	10.42	9.66	9.08	73.5716	74.5203	76.1685	3.0305	2.80601	2.64845	2.15895	3.31418	3.11293	16.0833	14.8892	12.8083	70.6833	71.3575	65.6417	5.77977	4.47688	5.24608
1172	low	1	2013-08-22	2013	10	10	1333.95	3.12514	3.24848	7.79221	0	3.28735	5	10.42	9.66	9.08	73.5716	74.5203	76.1685	3.0305	2.80601	2.64845	2.15895	3.31418	3.11293	16.0833	14.8892	12.8083	70.6833	71.3575	65.6417	5.77977	4.47688	5.24608
1173	low	1	2013-08-22	2013	10	10	1333.95	3.12514	3.24848	7.79221	0	3.28735	5	10.42	9.66	9.08	73.5716	74.5203	76.1685	3.0305	2.80601	2.64845	2.15895	3.31418	3.11293	16.0833	14.8892	12.8083	70.6833	71.3575	65.6417	5.77977	4.47688	5.24608
1174	low	1	2013-08-22	2013	10	10	1333.95	3.12514	3.24848	7.79221	0	3.28735	5	10.42	9.66	9.08	73.5716	74.5203	76.1685	3.0305	2.80601	2.64845	2.15895	3.31418	3.11293	16.0833	14.8892	12.8083	70.6833	71.3575	65.6417	5.77977	4.47688	5.24608
1175	low	1	2013-09-25	2013	10	10	1333.95	3.12514	3.24848	7.79221	0	3.28012	5	10.42	9.66	9.08	73.5716	74.5203	76.1685	3.0305	2.80601	2.64845	2.15895	3.31418	3.11293	16.0833	14.8892	12.8083	70.6833	71.3575	65.6417	5.77977	4.47688	5.24608
1176	low	1	2013-09-25	2013	10	10	1333.95	3.12514	3.24848	7.79221	1	3.28012	5	10.42	9.66	9.08	73.5716	74.5203	76.1685	3.0305	2.80601	2.64845	2.15895	3.31418	3.11293	16.0833	14.8892	12.8083	70.6833	71.3575	65.6417	5.77977	4.47688	5.24608
1177	low	1	2013-09-25	2013	10	10	1333.95	3.12514	3.24848	7.79221	0	3.28012	5	10.42	9.66	9.08	73.5716	74.5203	76.1685	3.0305	2.80601	2.64845	2.15895	3.31418	3.11293	16.0833	14.8892	12.8083	70.6833	71.3575	65.6417	5.77977	4.47688	5.24608
1178	low	1	2013-09-25	2013	10	10	1333.95	3.12514	3.24848	7.79221	0	3.28012	5	10.42	9.66	9.08	73.5716	74.5203	76.1685	3.0305	2.80601	2.64845	2.15895	3.31418	3.11293	16.0833	14.8892	12.8083	70.6833	71.3575	65.6417	5.77977	4.47688	5.24608
1179	low	1	2013-09-25	2013	10	10	1333.95	3.12514	3.24848	7.79221	0	3.28012	5	10.42	9.66	9.08	73.5716	74.5203	76.1685	3.0305	2.80601	2.64845	2.15895	3.31418	3.11293	16.0833	14.8892	12.8083	70.6833	71.3575	65.6417	5.77977	4.47688	5.24608
1180	low	1	2013-09-25	2013	10	10	1333.95	3.12514	3.24848	7.79221	0	3.28012	5	10.42	9.66	9.08	73.5716	74.5203	76.1685	3.0305	2.80601	2.64845	2.15895	3.31418	3.11293	16.0833	14.8892	12.8083	70.6833	71.3575	65.6417	5.77977	4.47688	5.24608
1181	low	1	2013-09-25	2013	10	10	1333.95	3.12514	3.24848	7.79221	0	3.28012	5	10.42	9.66	9.08	73.5716	74.5203	76.1685	3.0305	2.80601	2.64845	2.15895	3.31418	3.11293	16.0833	14.8892	12.8083	70.6833	71.3575	65.6417	5.77977	4.47688	5.24608
1182	low	1	2013-09-25	2013	10	10	1333.95	3.12514	3.24848	7.79221	0	3.28012	5	10.42	9.66	9.08	73.5716	74.5203	76.1685	3.0305	2.80601	2.64845	2.15895	3.31418	3.11293	16.0833	14.8892	12.8083	70.6833	71.3575	65.6417	5.77977	4.47688	5.24608
1183	low	1	2013-09-25	2013	10	10	1333.95	3.12514	3.24848	7.79221	1	3.28012	5	10.42	9.66	9.08	73.5716	74.5203	76.1685	3.0305	2.80601	2.64845	2.15895	3.31418	3.11293	16.0833	14.8892	12.8083	70.6833	71.3575	65.6417	5.77977	4.47688	5.24608
1184	low	1	2013-09-25	2013	10	10	1333.95	3.12514	3.24848	7.79221	0	3.28012	5	10.42	9.66	9.08	73.5716	74.5203	76.1685	3.0305	2.80601	2.64845	2.15895	3.31418	3.11293	16.0833	14.8892	12.8083	70.6833	71.3575	65.6417	5.77977	4.47688	5.24608
1185	low	1	2013-09-25	2013	10	10	1333.95	3.12514	3.24848	7.79221	0	3.28012	5	10.42	9.66	9.08	73.5716	74.5203	76.1685	3.0305	2.80601	2.64845	2.15895	3.31418	3.11293	16.0833	14.8892	12.8083	70.6833	71.3575	65.6417	5.77977	4.47688	5.24608
1186	low	1	2013-09-25	2013	10	10	1333.95	3.12514	3.24848	7.79221	0	3.28012	5	10.42	9.66	9.08	73.5716	74.5203	76.1685	3.0305	2.80601	2.64845	2.15895	3.31418	3.11293	16.0833	14.8892	12.8083	70.6833	71.3575	65.6417	5.77977	4.47688	5.24608
1187	low	1	2013-09-25	2013	10	10	1333.95	3.12514	3.24848	7.79221	1	3.28012	5	10.42	9.66	9.08	73.5716	74.5203	76.1685	3.0305	2.80601	2.64845	2.15895	3.31418	3.11293	16.0833	14.8892	12.8083	70.6833	71.3575	65.6417	5.77977	4.47688	5.24608
1188	low	1	2013-09-25	2013	10	10	1333.95	3.12514	3.24848	7.79221	0	3.28012	5	10.42	9.66	9.08	73.5716	74.5203	76.1685	3.0305	2.80601	2.64845	2.15895	3.31418	3.11293	16.0833	14.8892	12.8083	70.6833	71.3575	65.6417	5.77977	4.47688	5.24608
1189	low	1	2013-09-25	2013	10	10	1333.95	3.12514	3.24848	7.79221	0	3.28012	5	10.42	9.66	9.08	73.5716	74.5203	76.1685	3.0305	2.80601	2.64845	2.15895	3.31418	3.11293	16.0833	14.8892	12.8083	70.6833	71.3575	65.6417	5.77977	4.47688	5.24608
1190	low	1	2013-09-25	2013	10	10	1333.95	3.12514	3.24848	7.79221	0	3.28012	5	10.42	9.66	9.08	73.5716	74.5203	76.1685	3.0305	2.80601	2.64845	2.15895	3.31418	3.11293	16.0833	14.8892	12.8083	70.6833	71.3575	65.6417	5.77977	4.47688	5.24608
1191	low	1	2013-09-25	2013	10	10	1333.95	3.12514	3.24848	7.79221	1	3.28012	5	10.42	9.66	9.08	73.5716	74.5203	76.1685	3.0305	2.80601	2.64845	2.15895	3.31418	3.11293	16.0833	14.8892	12.8083	70.6833	71.3575	65.6417	5.77977	4.47688	5.24608
1192	low	1	2013-09-25	2013	10	10	1333.95	3.12514	3.24848	7.79221	0	3.28012	5	10.42	9.66	9.08	73.5716	74.5203	76.1685	3.0305	2.80601	2.64845	2.15895	3.31418	3.11293	16.0833	14.8892	12.8083	70.6833	71.3575	65.6417	5.77977	4.47688	5.24608
1193	low	1	2013-09-25	2013	10	10	1333.95	3.12514	3.24848	7.79221	0	3.28012	5	10.42	9.66	9.08	73.5716	74.5203	76.1685	3.0305	2.80601	2.64845	2.15895	3.31418	3.11293	16.0833	14.8892	12.8083	70.6833	71.3575	65.6417	5.77977	4.47688	5.24608
1194	low	1	2013-09-25	2013	10	10	1333.95	3.12514	3.24848	7.79221	0	3.28012	5	10.42	9.66	9.08	73.5716	74.5203	76.1685	3.0305	2.80601	2.64845	2.15895	3.31418	3.11293	16.0833	14.8892	12.8083	70.6833	71.3575	65.6417	5.77977	4.47688	5.24608
1195	low	1	2013-10-18	2013	10	10	1333.95	3.12514	3.24848	7.79221	0	3.27623	5	10.42	9.66	9.08	73.5716	74.5203	76.1685	3.0305	2.80601	2.64845	2.15895	3.31418	3.11293	16.0833	14.8892	12.8083	70.6833	71.3575	65.6417	5.77977	4.47688	5.24608
1196	low	1	2013-10-18	2013	10	10	1333.95	3.12514	3.24848	7.79221	0	3.27623	5	10.42	9.66	9.08	73.5716	74.5203	76.1685	3.0305	2.80601	2.64845	2.15895	3.31418	3.11293	16.0833	14.8892	12.8083	70.6833	71.3575	65.6417	5.77977	4.47688	5.24608
1197	low	1	2013-10-18	2013	10	10	1333.95	3.12514	3.24848	7.79221	0	3.27623	5	10.42	9.66	9.08	73.5716	74.5203	76.1685	3.0305	2.80601	2.64845	2.15895	3.31418	3.11293	16.0833	14.8892	12.8083	70.6833	71.3575	65.6417	5.77977	4.47688	5.24608
1198	low	1	2013-10-18	2013	10	10	1333.95	3.12514	3.24848	7.79221	0	3.27623	5	10.42	9.66	9.08	73.5716	74.5203	76.1685	3.0305	2.80601	2.64845	2.15895	3.31418	3.11293	16.0833	14.8892	12.8083	70.6833	71.3575	65.6417	5.77977	4.47688	5.24608
1199	low	1	2013-10-18	2013	10	10	1333.95	3.12514	3.24848	7.79221	1	3.27623	5	10.42	9.66	9.08	73.5716	74.5203	76.1685	3.0305	2.80601	2.64845	2.15895	3.31418	3.11293	16.0833	14.8892	12.8083	70.6833	71.3575	65.6417	5.77977	4.47688	5.24608
1200	low	1	2013-10-18	2013	10	10	1333.95	3.12514	3.24848	7.79221	0	3.27623	5	10.42	9.66	9.08	73.5716	74.5203	76.1685	3.0305	2.80601	2.64845	2.15895	3.31418	3.11293	16.0833	14.8892	12.8083	70.6833	71.3575	65.6417	5.77977	4.47688	5.24608
1201	low	1	2013-10-18	2013	10	10	1333.95	3.12514	3.24848	7.79221	0	3.27623	5	10.42	9.66	9.08	73.5716	74.5203	76.1685	3.0305	2.80601	2.64845	2.15895	3.31418	3.11293	16.0833	14.8892	12.8083	70.6833	71.3575	65.6417	5.77977	4.47688	5.24608
1202	low	1	2013-10-18	2013	10	10	1333.95	3.12514	3.24848	7.79221	0	3.27623	5	10.42	9.66	9.08	73.5716	74.5203	76.1685	3.0305	2.80601	2.64845	2.15895	3.31418	3.11293	16.0833	14.8892	12.8083	70.6833	71.3575	65.6417	5.77977	4.47688	5.24608
1203	low	1	2013-10-18	2013	10	10	1333.95	3.12514	3.24848	7.79221	0	3.27623	5	10.42	9.66	9.08	73.5716	74.5203	76.1685	3.0305	2.80601	2.64845	2.15895	3.31418	3.11293	16.0833	14.8892	12.8083	70.6833	71.3575	65.6417	5.77977	4.47688	5.24608
1204	low	1	2013-10-18	2013	10	10	1333.95	3.12514	3.24848	7.79221	0	3.27623	5	10.42	9.66	9.08	73.5716	74.5203	76.1685	3.0305	2.80601	2.64845	2.15895	3.31418	3.11293	16.0833	14.8892	12.8083	70.6833	71.3575	65.6417	5.77977	4.47688	5.24608
1205	low	1	2013-10-18	2013	10	10	1333.95	3.12514	3.24848	7.79221	1	3.27623	5	10.42	9.66	9.08	73.5716	74.5203	76.1685	3.0305	2.80601	2.64845	2.15895	3.31418	3.11293	16.0833	14.8892	12.8083	70.6833	71.3575	65.6417	5.77977	4.47688	5.24608
1206	low	1	2013-10-18	2013	10	10	1333.95	3.12514	3.24848	7.79221	0	3.27623	5	10.42	9.66	9.08	73.5716	74.5203	76.1685	3.0305	2.80601	2.64845	2.15895	3.31418	3.11293	16.0833	14.8892	12.8083	70.6833	71.3575	65.6417	5.77977	4.47688	5.24608
1207	low	1	2013-10-18	2013	10	10	1333.95	3.12514	3.24848	7.79221	1	3.27623	5	10.42	9.66	9.08	73.5716	74.5203	76.1685	3.0305	2.80601	2.64845	2.15895	3.31418	3.11293	16.0833	14.8892	12.8083	70.6833	71.3575	65.6417	5.77977	4.47688	5.24608
1208	low	1	2013-10-18	2013	10	10	1333.95	3.12514	3.24848	7.79221	1	3.27623	5	10.42	9.66	9.08	73.5716	74.5203	76.1685	3.0305	2.80601	2.64845	2.15895	3.31418	3.11293	16.0833	14.8892	12.8083	70.6833	71.3575	65.6417	5.77977	4.47688	5.24608
1209	low	1	2013-10-18	2013	10	10	1333.95	3.12514	3.24848	7.79221	0	3.27623	5	10.42	9.66	9.08	73.5716	74.5203	76.1685	3.0305	2.80601	2.64845	2.15895	3.31418	3.11293	16.0833	14.8892	12.8083	70.6833	71.3575	65.6417	5.77977	4.47688	5.24608
1210	low	1	2013-10-18	2013	10	10	1333.95	3.12514	3.24848	7.79221	0	3.27623	5	10.42	9.66	9.08	73.5716	74.5203	76.1685	3.0305	2.80601	2.64845	2.15895	3.31418	3.11293	16.0833	14.8892	12.8083	70.6833	71.3575	65.6417	5.77977	4.47688	5.24608
1211	low	1	2013-10-18	2013	10	10	1333.95	3.12514	3.24848	7.79221	0	3.27623	5	10.42	9.66	9.08	73.5716	74.5203	76.1685	3.0305	2.80601	2.64845	2.15895	3.31418	3.11293	16.0833	14.8892	12.8083	70.6833	71.3575	65.6417	5.77977	4.47688	5.24608
1212	low	1	2013-10-18	2013	10	10	1333.95	3.12514	3.24848	7.79221	0	3.27623	5	10.42	9.66	9.08	73.5716	74.5203	76.1685	3.0305	2.80601	2.64845	2.15895	3.31418	3.11293	16.0833	14.8892	12.8083	70.6833	71.3575	65.6417	5.77977	4.47688	5.24608
1213	low	1	2014-02-20	2014	11	11	472.238	2.67416	3.12514	2.76243	0	3.26834	1	9.66	9.08	10.42	74.5203	76.1685	76.6972	2.80601	2.64845	2.58654	3.31418	3.11293	2.64958	14.8892	12.8083	15.2083	71.3575	65.6417	64.1	4.47688	5.24608	5.56116
1214	low	1	2014-02-20	2014	11	11	472.238	2.67416	3.12514	2.76243	0	3.26834	1	9.66	9.08	10.42	74.5203	76.1685	76.6972	2.80601	2.64845	2.58654	3.31418	3.11293	2.64958	14.8892	12.8083	15.2083	71.3575	65.6417	64.1	4.47688	5.24608	5.56116
1215	low	1	2014-02-20	2014	11	11	472.238	2.67416	3.12514	2.76243	0	3.26834	1	9.66	9.08	10.42	74.5203	76.1685	76.6972	2.80601	2.64845	2.58654	3.31418	3.11293	2.64958	14.8892	12.8083	15.2083	71.3575	65.6417	64.1	4.47688	5.24608	5.56116
1216	low	1	2014-02-20	2014	11	11	472.238	2.67416	3.12514	2.76243	0	3.26834	1	9.66	9.08	10.42	74.5203	76.1685	76.6972	2.80601	2.64845	2.58654	3.31418	3.11293	2.64958	14.8892	12.8083	15.2083	71.3575	65.6417	64.1	4.47688	5.24608	5.56116
1217	low	1	2014-02-20	2014	11	11	472.238	2.67416	3.12514	2.76243	0	3.26834	1	9.66	9.08	10.42	74.5203	76.1685	76.6972	2.80601	2.64845	2.58654	3.31418	3.11293	2.64958	14.8892	12.8083	15.2083	71.3575	65.6417	64.1	4.47688	5.24608	5.56116
1218	low	1	2014-02-20	2014	11	11	472.238	2.67416	3.12514	2.76243	0	3.26834	1	9.66	9.08	10.42	74.5203	76.1685	76.6972	2.80601	2.64845	2.58654	3.31418	3.11293	2.64958	14.8892	12.8083	15.2083	71.3575	65.6417	64.1	4.47688	5.24608	5.56116
1219	low	1	2014-02-20	2014	11	11	472.238	2.67416	3.12514	2.76243	0	3.26834	1	9.66	9.08	10.42	74.5203	76.1685	76.6972	2.80601	2.64845	2.58654	3.31418	3.11293	2.64958	14.8892	12.8083	15.2083	71.3575	65.6417	64.1	4.47688	5.24608	5.56116
1220	low	1	2014-02-20	2014	11	11	472.238	2.67416	3.12514	2.76243	0	3.26834	1	9.66	9.08	10.42	74.5203	76.1685	76.6972	2.80601	2.64845	2.58654	3.31418	3.11293	2.64958	14.8892	12.8083	15.2083	71.3575	65.6417	64.1	4.47688	5.24608	5.56116
1221	low	1	2014-02-20	2014	11	11	472.238	2.67416	3.12514	2.76243	0	3.26834	1	9.66	9.08	10.42	74.5203	76.1685	76.6972	2.80601	2.64845	2.58654	3.31418	3.11293	2.64958	14.8892	12.8083	15.2083	71.3575	65.6417	64.1	4.47688	5.24608	5.56116
1222	low	1	2014-02-20	2014	11	11	472.238	2.67416	3.12514	2.76243	0	3.26834	1	9.66	9.08	10.42	74.5203	76.1685	76.6972	2.80601	2.64845	2.58654	3.31418	3.11293	2.64958	14.8892	12.8083	15.2083	71.3575	65.6417	64.1	4.47688	5.24608	5.56116
1223	low	1	2014-02-20	2014	11	11	472.238	2.67416	3.12514	2.76243	0	3.26834	1	9.66	9.08	10.42	74.5203	76.1685	76.6972	2.80601	2.64845	2.58654	3.31418	3.11293	2.64958	14.8892	12.8083	15.2083	71.3575	65.6417	64.1	4.47688	5.24608	5.56116
1224	low	1	2014-02-20	2014	11	11	472.238	2.67416	3.12514	2.76243	0	3.26834	1	9.66	9.08	10.42	74.5203	76.1685	76.6972	2.80601	2.64845	2.58654	3.31418	3.11293	2.64958	14.8892	12.8083	15.2083	71.3575	65.6417	64.1	4.47688	5.24608	5.56116
1225	low	1	2014-02-20	2014	11	11	472.238	2.67416	3.12514	2.76243	0	3.26834	1	9.66	9.08	10.42	74.5203	76.1685	76.6972	2.80601	2.64845	2.58654	3.31418	3.11293	2.64958	14.8892	12.8083	15.2083	71.3575	65.6417	64.1	4.47688	5.24608	5.56116
1226	low	1	2014-02-20	2014	11	11	472.238	2.67416	3.12514	2.76243	0	3.26834	1	9.66	9.08	10.42	74.5203	76.1685	76.6972	2.80601	2.64845	2.58654	3.31418	3.11293	2.64958	14.8892	12.8083	15.2083	71.3575	65.6417	64.1	4.47688	5.24608	5.56116
1227	low	1	2014-02-20	2014	11	11	472.238	2.67416	3.12514	2.76243	0	3.26834	1	9.66	9.08	10.42	74.5203	76.1685	76.6972	2.80601	2.64845	2.58654	3.31418	3.11293	2.64958	14.8892	12.8083	15.2083	71.3575	65.6417	64.1	4.47688	5.24608	5.56116
1228	low	1	2014-03-18	2014	11	11	472.238	2.67416	3.12514	2.76243	0	3.26694	1	9.66	9.08	10.42	74.5203	76.1685	76.6972	2.80601	2.64845	2.58654	3.31418	3.11293	2.64958	14.8892	12.8083	15.2083	71.3575	65.6417	64.1	4.47688	5.24608	5.56116
1229	low	1	2014-03-18	2014	11	11	472.238	2.67416	3.12514	2.76243	0	3.26694	1	9.66	9.08	10.42	74.5203	76.1685	76.6972	2.80601	2.64845	2.58654	3.31418	3.11293	2.64958	14.8892	12.8083	15.2083	71.3575	65.6417	64.1	4.47688	5.24608	5.56116
1230	low	1	2014-03-18	2014	11	11	472.238	2.67416	3.12514	2.76243	0	3.26694	1	9.66	9.08	10.42	74.5203	76.1685	76.6972	2.80601	2.64845	2.58654	3.31418	3.11293	2.64958	14.8892	12.8083	15.2083	71.3575	65.6417	64.1	4.47688	5.24608	5.56116
1231	low	1	2014-03-18	2014	11	11	472.238	2.67416	3.12514	2.76243	0	3.26694	1	9.66	9.08	10.42	74.5203	76.1685	76.6972	2.80601	2.64845	2.58654	3.31418	3.11293	2.64958	14.8892	12.8083	15.2083	71.3575	65.6417	64.1	4.47688	5.24608	5.56116
1232	low	1	2014-03-18	2014	11	11	472.238	2.67416	3.12514	2.76243	0	3.26694	1	9.66	9.08	10.42	74.5203	76.1685	76.6972	2.80601	2.64845	2.58654	3.31418	3.11293	2.64958	14.8892	12.8083	15.2083	71.3575	65.6417	64.1	4.47688	5.24608	5.56116
1233	low	1	2014-03-18	2014	11	11	472.238	2.67416	3.12514	2.76243	0	3.26694	1	9.66	9.08	10.42	74.5203	76.1685	76.6972	2.80601	2.64845	2.58654	3.31418	3.11293	2.64958	14.8892	12.8083	15.2083	71.3575	65.6417	64.1	4.47688	5.24608	5.56116
1234	low	1	2014-03-18	2014	11	11	472.238	2.67416	3.12514	2.76243	0	3.26694	1	9.66	9.08	10.42	74.5203	76.1685	76.6972	2.80601	2.64845	2.58654	3.31418	3.11293	2.64958	14.8892	12.8083	15.2083	71.3575	65.6417	64.1	4.47688	5.24608	5.56116
1235	low	1	2014-03-18	2014	11	11	472.238	2.67416	3.12514	2.76243	0	3.26694	1	9.66	9.08	10.42	74.5203	76.1685	76.6972	2.80601	2.64845	2.58654	3.31418	3.11293	2.64958	14.8892	12.8083	15.2083	71.3575	65.6417	64.1	4.47688	5.24608	5.56116
1236	low	1	2014-03-18	2014	11	11	472.238	2.67416	3.12514	2.76243	0	3.26694	1	9.66	9.08	10.42	74.5203	76.1685	76.6972	2.80601	2.64845	2.58654	3.31418	3.11293	2.64958	14.8892	12.8083	15.2083	71.3575	65.6417	64.1	4.47688	5.24608	5.56116
1237	low	1	2014-03-18	2014	11	11	472.238	2.67416	3.12514	2.76243	0	3.26694	1	9.66	9.08	10.42	74.5203	76.1685	76.6972	2.80601	2.64845	2.58654	3.31418	3.11293	2.64958	14.8892	12.8083	15.2083	71.3575	65.6417	64.1	4.47688	5.24608	5.56116
1238	low	1	2014-03-18	2014	11	11	472.238	2.67416	3.12514	2.76243	0	3.26694	1	9.66	9.08	10.42	74.5203	76.1685	76.6972	2.80601	2.64845	2.58654	3.31418	3.11293	2.64958	14.8892	12.8083	15.2083	71.3575	65.6417	64.1	4.47688	5.24608	5.56116
1239	low	1	2014-03-18	2014	11	11	472.238	2.67416	3.12514	2.76243	0	3.26694	1	9.66	9.08	10.42	74.5203	76.1685	76.6972	2.80601	2.64845	2.58654	3.31418	3.11293	2.64958	14.8892	12.8083	15.2083	71.3575	65.6417	64.1	4.47688	5.24608	5.56116
1240	low	1	2014-03-18	2014	11	11	472.238	2.67416	3.12514	2.76243	0	3.26694	1	9.66	9.08	10.42	74.5203	76.1685	76.6972	2.80601	2.64845	2.58654	3.31418	3.11293	2.64958	14.8892	12.8083	15.2083	71.3575	65.6417	64.1	4.47688	5.24608	5.56116
1241	low	1	2014-03-18	2014	11	11	472.238	2.67416	3.12514	2.76243	0	3.26694	1	9.66	9.08	10.42	74.5203	76.1685	76.6972	2.80601	2.64845	2.58654	3.31418	3.11293	2.64958	14.8892	12.8083	15.2083	71.3575	65.6417	64.1	4.47688	5.24608	5.56116
1242	low	1	2014-03-18	2014	11	11	472.238	2.67416	3.12514	2.76243	0	3.26694	1	9.66	9.08	10.42	74.5203	76.1685	76.6972	2.80601	2.64845	2.58654	3.31418	3.11293	2.64958	14.8892	12.8083	15.2083	71.3575	65.6417	64.1	4.47688	5.24608	5.56116
1243	low	1	2014-03-18	2014	11	11	472.238	2.67416	3.12514	2.76243	0	3.26694	1	9.66	9.08	10.42	74.5203	76.1685	76.6972	2.80601	2.64845	2.58654	3.31418	3.11293	2.64958	14.8892	12.8083	15.2083	71.3575	65.6417	64.1	4.47688	5.24608	5.56116
1244	low	1	2014-03-18	2014	11	11	472.238	2.67416	3.12514	2.76243	0	3.26694	1	9.66	9.08	10.42	74.5203	76.1685	76.6972	2.80601	2.64845	2.58654	3.31418	3.11293	2.64958	14.8892	12.8083	15.2083	71.3575	65.6417	64.1	4.47688	5.24608	5.56116
1245	low	1	2014-03-18	2014	11	11	472.238	2.67416	3.12514	2.76243	0	3.26694	1	9.66	9.08	10.42	74.5203	76.1685	76.6972	2.80601	2.64845	2.58654	3.31418	3.11293	2.64958	14.8892	12.8083	15.2083	71.3575	65.6417	64.1	4.47688	5.24608	5.56116
1246	low	1	2014-03-18	2014	11	11	472.238	2.67416	3.12514	2.76243	0	3.26694	1	9.66	9.08	10.42	74.5203	76.1685	76.6972	2.80601	2.64845	2.58654	3.31418	3.11293	2.64958	14.8892	12.8083	15.2083	71.3575	65.6417	64.1	4.47688	5.24608	5.56116
1247	low	1	2014-03-18	2014	11	11	472.238	2.67416	3.12514	2.76243	0	3.26694	1	9.66	9.08	10.42	74.5203	76.1685	76.6972	2.80601	2.64845	2.58654	3.31418	3.11293	2.64958	14.8892	12.8083	15.2083	71.3575	65.6417	64.1	4.47688	5.24608	5.56116
1248	low	1	2014-04-24	2014	11	11	472.238	2.67416	3.12514	2.76243	0	3.26623	1	9.66	9.08	10.42	74.5203	76.1685	76.6972	2.80601	2.64845	2.58654	3.31418	3.11293	2.64958	14.8892	12.8083	15.2083	71.3575	65.6417	64.1	4.47688	5.24608	5.56116
1249	low	1	2014-04-24	2014	11	11	472.238	2.67416	3.12514	2.76243	0	3.26623	1	9.66	9.08	10.42	74.5203	76.1685	76.6972	2.80601	2.64845	2.58654	3.31418	3.11293	2.64958	14.8892	12.8083	15.2083	71.3575	65.6417	64.1	4.47688	5.24608	5.56116
1250	low	1	2014-04-24	2014	11	11	472.238	2.67416	3.12514	2.76243	0	3.26623	1	9.66	9.08	10.42	74.5203	76.1685	76.6972	2.80601	2.64845	2.58654	3.31418	3.11293	2.64958	14.8892	12.8083	15.2083	71.3575	65.6417	64.1	4.47688	5.24608	5.56116
1251	low	1	2014-04-24	2014	11	11	472.238	2.67416	3.12514	2.76243	0	3.26623	1	9.66	9.08	10.42	74.5203	76.1685	76.6972	2.80601	2.64845	2.58654	3.31418	3.11293	2.64958	14.8892	12.8083	15.2083	71.3575	65.6417	64.1	4.47688	5.24608	5.56116
1252	low	1	2014-04-24	2014	11	11	472.238	2.67416	3.12514	2.76243	0	3.26623	1	9.66	9.08	10.42	74.5203	76.1685	76.6972	2.80601	2.64845	2.58654	3.31418	3.11293	2.64958	14.8892	12.8083	15.2083	71.3575	65.6417	64.1	4.47688	5.24608	5.56116
1253	low	1	2014-04-24	2014	11	11	472.238	2.67416	3.12514	2.76243	0	3.26623	1	9.66	9.08	10.42	74.5203	76.1685	76.6972	2.80601	2.64845	2.58654	3.31418	3.11293	2.64958	14.8892	12.8083	15.2083	71.3575	65.6417	64.1	4.47688	5.24608	5.56116
1254	low	1	2014-04-24	2014	11	11	472.238	2.67416	3.12514	2.76243	0	3.26623	1	9.66	9.08	10.42	74.5203	76.1685	76.6972	2.80601	2.64845	2.58654	3.31418	3.11293	2.64958	14.8892	12.8083	15.2083	71.3575	65.6417	64.1	4.47688	5.24608	5.56116
1255	low	1	2014-04-24	2014	11	11	472.238	2.67416	3.12514	2.76243	0	3.26623	1	9.66	9.08	10.42	74.5203	76.1685	76.6972	2.80601	2.64845	2.58654	3.31418	3.11293	2.64958	14.8892	12.8083	15.2083	71.3575	65.6417	64.1	4.47688	5.24608	5.56116
1256	low	1	2014-04-24	2014	11	11	472.238	2.67416	3.12514	2.76243	0	3.26623	1	9.66	9.08	10.42	74.5203	76.1685	76.6972	2.80601	2.64845	2.58654	3.31418	3.11293	2.64958	14.8892	12.8083	15.2083	71.3575	65.6417	64.1	4.47688	5.24608	5.56116
1257	low	1	2014-04-24	2014	11	11	472.238	2.67416	3.12514	2.76243	0	3.26623	1	9.66	9.08	10.42	74.5203	76.1685	76.6972	2.80601	2.64845	2.58654	3.31418	3.11293	2.64958	14.8892	12.8083	15.2083	71.3575	65.6417	64.1	4.47688	5.24608	5.56116
1258	low	1	2014-04-24	2014	11	11	472.238	2.67416	3.12514	2.76243	0	3.26623	1	9.66	9.08	10.42	74.5203	76.1685	76.6972	2.80601	2.64845	2.58654	3.31418	3.11293	2.64958	14.8892	12.8083	15.2083	71.3575	65.6417	64.1	4.47688	5.24608	5.56116
1259	low	1	2014-04-24	2014	11	11	472.238	2.67416	3.12514	2.76243	0	3.26623	1	9.66	9.08	10.42	74.5203	76.1685	76.6972	2.80601	2.64845	2.58654	3.31418	3.11293	2.64958	14.8892	12.8083	15.2083	71.3575	65.6417	64.1	4.47688	5.24608	5.56116
1260	low	1	2014-04-24	2014	11	11	472.238	2.67416	3.12514	2.76243	0	3.26623	1	9.66	9.08	10.42	74.5203	76.1685	76.6972	2.80601	2.64845	2.58654	3.31418	3.11293	2.64958	14.8892	12.8083	15.2083	71.3575	65.6417	64.1	4.47688	5.24608	5.56116
1261	low	1	2014-04-24	2014	11	11	472.238	2.67416	3.12514	2.76243	0	3.26623	1	9.66	9.08	10.42	74.5203	76.1685	76.6972	2.80601	2.64845	2.58654	3.31418	3.11293	2.64958	14.8892	12.8083	15.2083	71.3575	65.6417	64.1	4.47688	5.24608	5.56116
1262	low	1	2014-04-24	2014	11	11	472.238	2.67416	3.12514	2.76243	0	3.26623	1	9.66	9.08	10.42	74.5203	76.1685	76.6972	2.80601	2.64845	2.58654	3.31418	3.11293	2.64958	14.8892	12.8083	15.2083	71.3575	65.6417	64.1	4.47688	5.24608	5.56116
1263	low	1	2014-04-24	2014	11	11	472.238	2.67416	3.12514	2.76243	0	3.26623	1	9.66	9.08	10.42	74.5203	76.1685	76.6972	2.80601	2.64845	2.58654	3.31418	3.11293	2.64958	14.8892	12.8083	15.2083	71.3575	65.6417	64.1	4.47688	5.24608	5.56116
1264	low	1	2014-04-24	2014	11	11	472.238	2.67416	3.12514	2.76243	0	3.26623	1	9.66	9.08	10.42	74.5203	76.1685	76.6972	2.80601	2.64845	2.58654	3.31418	3.11293	2.64958	14.8892	12.8083	15.2083	71.3575	65.6417	64.1	4.47688	5.24608	5.56116
1265	low	1	2014-04-24	2014	11	11	472.238	2.67416	3.12514	2.76243	0	3.26623	1	9.66	9.08	10.42	74.5203	76.1685	76.6972	2.80601	2.64845	2.58654	3.31418	3.11293	2.64958	14.8892	12.8083	15.2083	71.3575	65.6417	64.1	4.47688	5.24608	5.56116
1266	low	1	2014-04-24	2014	11	11	472.238	2.67416	3.12514	2.76243	0	3.26623	1	9.66	9.08	10.42	74.5203	76.1685	76.6972	2.80601	2.64845	2.58654	3.31418	3.11293	2.64958	14.8892	12.8083	15.2083	71.3575	65.6417	64.1	4.47688	5.24608	5.56116
1267	low	1	2014-04-24	2014	11	11	472.238	2.67416	3.12514	2.76243	0	3.26623	1	9.66	9.08	10.42	74.5203	76.1685	76.6972	2.80601	2.64845	2.58654	3.31418	3.11293	2.64958	14.8892	12.8083	15.2083	71.3575	65.6417	64.1	4.47688	5.24608	5.56116
1268	low	1	2014-05-20	2014	11	11	472.238	2.67416	3.12514	2.76243	0	3.26079	1	9.66	9.08	10.42	74.5203	76.1685	76.6972	2.80601	2.64845	2.58654	3.31418	3.11293	2.64958	14.8892	12.8083	15.2083	71.3575	65.6417	64.1	4.47688	5.24608	5.56116
1269	low	1	2014-05-20	2014	11	11	472.238	2.67416	3.12514	2.76243	0	3.26079	1	9.66	9.08	10.42	74.5203	76.1685	76.6972	2.80601	2.64845	2.58654	3.31418	3.11293	2.64958	14.8892	12.8083	15.2083	71.3575	65.6417	64.1	4.47688	5.24608	5.56116
1270	low	1	2014-05-20	2014	11	11	472.238	2.67416	3.12514	2.76243	0	3.26079	1	9.66	9.08	10.42	74.5203	76.1685	76.6972	2.80601	2.64845	2.58654	3.31418	3.11293	2.64958	14.8892	12.8083	15.2083	71.3575	65.6417	64.1	4.47688	5.24608	5.56116
1271	low	1	2014-05-20	2014	11	11	472.238	2.67416	3.12514	2.76243	0	3.26079	1	9.66	9.08	10.42	74.5203	76.1685	76.6972	2.80601	2.64845	2.58654	3.31418	3.11293	2.64958	14.8892	12.8083	15.2083	71.3575	65.6417	64.1	4.47688	5.24608	5.56116
1272	low	1	2014-05-20	2014	11	11	472.238	2.67416	3.12514	2.76243	0	3.26079	1	9.66	9.08	10.42	74.5203	76.1685	76.6972	2.80601	2.64845	2.58654	3.31418	3.11293	2.64958	14.8892	12.8083	15.2083	71.3575	65.6417	64.1	4.47688	5.24608	5.56116
1273	low	1	2014-05-20	2014	11	11	472.238	2.67416	3.12514	2.76243	0	3.26079	1	9.66	9.08	10.42	74.5203	76.1685	76.6972	2.80601	2.64845	2.58654	3.31418	3.11293	2.64958	14.8892	12.8083	15.2083	71.3575	65.6417	64.1	4.47688	5.24608	5.56116
1274	low	1	2014-05-20	2014	11	11	472.238	2.67416	3.12514	2.76243	0	3.26079	1	9.66	9.08	10.42	74.5203	76.1685	76.6972	2.80601	2.64845	2.58654	3.31418	3.11293	2.64958	14.8892	12.8083	15.2083	71.3575	65.6417	64.1	4.47688	5.24608	5.56116
1275	low	1	2014-05-20	2014	11	11	472.238	2.67416	3.12514	2.76243	0	3.26079	1	9.66	9.08	10.42	74.5203	76.1685	76.6972	2.80601	2.64845	2.58654	3.31418	3.11293	2.64958	14.8892	12.8083	15.2083	71.3575	65.6417	64.1	4.47688	5.24608	5.56116
1276	low	1	2014-05-20	2014	11	11	472.238	2.67416	3.12514	2.76243	0	3.26079	1	9.66	9.08	10.42	74.5203	76.1685	76.6972	2.80601	2.64845	2.58654	3.31418	3.11293	2.64958	14.8892	12.8083	15.2083	71.3575	65.6417	64.1	4.47688	5.24608	5.56116
1277	low	1	2014-05-20	2014	11	11	472.238	2.67416	3.12514	2.76243	0	3.26079	1	9.66	9.08	10.42	74.5203	76.1685	76.6972	2.80601	2.64845	2.58654	3.31418	3.11293	2.64958	14.8892	12.8083	15.2083	71.3575	65.6417	64.1	4.47688	5.24608	5.56116
1278	low	1	2014-05-20	2014	11	11	472.238	2.67416	3.12514	2.76243	0	3.26079	1	9.66	9.08	10.42	74.5203	76.1685	76.6972	2.80601	2.64845	2.58654	3.31418	3.11293	2.64958	14.8892	12.8083	15.2083	71.3575	65.6417	64.1	4.47688	5.24608	5.56116
1279	low	1	2014-05-20	2014	11	11	472.238	2.67416	3.12514	2.76243	0	3.26079	1	9.66	9.08	10.42	74.5203	76.1685	76.6972	2.80601	2.64845	2.58654	3.31418	3.11293	2.64958	14.8892	12.8083	15.2083	71.3575	65.6417	64.1	4.47688	5.24608	5.56116
1280	low	1	2014-05-20	2014	11	11	472.238	2.67416	3.12514	2.76243	0	3.26079	1	9.66	9.08	10.42	74.5203	76.1685	76.6972	2.80601	2.64845	2.58654	3.31418	3.11293	2.64958	14.8892	12.8083	15.2083	71.3575	65.6417	64.1	4.47688	5.24608	5.56116
1281	low	1	2014-05-20	2014	11	11	472.238	2.67416	3.12514	2.76243	0	3.26079	1	9.66	9.08	10.42	74.5203	76.1685	76.6972	2.80601	2.64845	2.58654	3.31418	3.11293	2.64958	14.8892	12.8083	15.2083	71.3575	65.6417	64.1	4.47688	5.24608	5.56116
1282	low	1	2014-05-20	2014	11	11	472.238	2.67416	3.12514	2.76243	0	3.26079	1	9.66	9.08	10.42	74.5203	76.1685	76.6972	2.80601	2.64845	2.58654	3.31418	3.11293	2.64958	14.8892	12.8083	15.2083	71.3575	65.6417	64.1	4.47688	5.24608	5.56116
1283	low	1	2014-05-20	2014	11	11	472.238	2.67416	3.12514	2.76243	0	3.26079	1	9.66	9.08	10.42	74.5203	76.1685	76.6972	2.80601	2.64845	2.58654	3.31418	3.11293	2.64958	14.8892	12.8083	15.2083	71.3575	65.6417	64.1	4.47688	5.24608	5.56116
1284	low	1	2014-05-20	2014	11	11	472.238	2.67416	3.12514	2.76243	0	3.26079	1	9.66	9.08	10.42	74.5203	76.1685	76.6972	2.80601	2.64845	2.58654	3.31418	3.11293	2.64958	14.8892	12.8083	15.2083	71.3575	65.6417	64.1	4.47688	5.24608	5.56116
1285	low	1	2014-05-20	2014	11	11	472.238	2.67416	3.12514	2.76243	0	3.26079	1	9.66	9.08	10.42	74.5203	76.1685	76.6972	2.80601	2.64845	2.58654	3.31418	3.11293	2.64958	14.8892	12.8083	15.2083	71.3575	65.6417	64.1	4.47688	5.24608	5.56116
1286	low	1	2014-05-20	2014	11	11	472.238	2.67416	3.12514	2.76243	0	3.26079	1	9.66	9.08	10.42	74.5203	76.1685	76.6972	2.80601	2.64845	2.58654	3.31418	3.11293	2.64958	14.8892	12.8083	15.2083	71.3575	65.6417	64.1	4.47688	5.24608	5.56116
1287	low	1	2014-05-20	2014	11	11	472.238	2.67416	3.12514	2.76243	0	3.26079	1	9.66	9.08	10.42	74.5203	76.1685	76.6972	2.80601	2.64845	2.58654	3.31418	3.11293	2.64958	14.8892	12.8083	15.2083	71.3575	65.6417	64.1	4.47688	5.24608	5.56116
1288	low	1	2014-07-01	2014	11	11	472.238	2.67416	3.12514	2.76243	0	3.25575	1	9.66	9.08	10.42	74.5203	76.1685	76.6972	2.80601	2.64845	2.58654	3.31418	3.11293	2.64958	14.8892	12.8083	15.2083	71.3575	65.6417	64.1	4.47688	5.24608	5.56116
1289	low	1	2014-07-01	2014	11	11	472.238	2.67416	3.12514	2.76243	0	3.25575	1	9.66	9.08	10.42	74.5203	76.1685	76.6972	2.80601	2.64845	2.58654	3.31418	3.11293	2.64958	14.8892	12.8083	15.2083	71.3575	65.6417	64.1	4.47688	5.24608	5.56116
1290	low	1	2014-07-01	2014	11	11	472.238	2.67416	3.12514	2.76243	0	3.25575	1	9.66	9.08	10.42	74.5203	76.1685	76.6972	2.80601	2.64845	2.58654	3.31418	3.11293	2.64958	14.8892	12.8083	15.2083	71.3575	65.6417	64.1	4.47688	5.24608	5.56116
1291	low	1	2014-07-01	2014	11	11	472.238	2.67416	3.12514	2.76243	0	3.25575	1	9.66	9.08	10.42	74.5203	76.1685	76.6972	2.80601	2.64845	2.58654	3.31418	3.11293	2.64958	14.8892	12.8083	15.2083	71.3575	65.6417	64.1	4.47688	5.24608	5.56116
1292	low	1	2014-07-01	2014	11	11	472.238	2.67416	3.12514	2.76243	0	3.25575	1	9.66	9.08	10.42	74.5203	76.1685	76.6972	2.80601	2.64845	2.58654	3.31418	3.11293	2.64958	14.8892	12.8083	15.2083	71.3575	65.6417	64.1	4.47688	5.24608	5.56116
1293	low	1	2014-07-01	2014	11	11	472.238	2.67416	3.12514	2.76243	0	3.25575	1	9.66	9.08	10.42	74.5203	76.1685	76.6972	2.80601	2.64845	2.58654	3.31418	3.11293	2.64958	14.8892	12.8083	15.2083	71.3575	65.6417	64.1	4.47688	5.24608	5.56116
1294	low	1	2014-07-01	2014	11	11	472.238	2.67416	3.12514	2.76243	0	3.25575	1	9.66	9.08	10.42	74.5203	76.1685	76.6972	2.80601	2.64845	2.58654	3.31418	3.11293	2.64958	14.8892	12.8083	15.2083	71.3575	65.6417	64.1	4.47688	5.24608	5.56116
1295	low	1	2014-07-01	2014	11	11	472.238	2.67416	3.12514	2.76243	0	3.25575	1	9.66	9.08	10.42	74.5203	76.1685	76.6972	2.80601	2.64845	2.58654	3.31418	3.11293	2.64958	14.8892	12.8083	15.2083	71.3575	65.6417	64.1	4.47688	5.24608	5.56116
1296	low	1	2014-07-01	2014	11	11	472.238	2.67416	3.12514	2.76243	0	3.25575	1	9.66	9.08	10.42	74.5203	76.1685	76.6972	2.80601	2.64845	2.58654	3.31418	3.11293	2.64958	14.8892	12.8083	15.2083	71.3575	65.6417	64.1	4.47688	5.24608	5.56116
1297	low	1	2014-07-01	2014	11	11	472.238	2.67416	3.12514	2.76243	0	3.25575	1	9.66	9.08	10.42	74.5203	76.1685	76.6972	2.80601	2.64845	2.58654	3.31418	3.11293	2.64958	14.8892	12.8083	15.2083	71.3575	65.6417	64.1	4.47688	5.24608	5.56116
1298	low	1	2014-07-01	2014	11	11	472.238	2.67416	3.12514	2.76243	0	3.25575	1	9.66	9.08	10.42	74.5203	76.1685	76.6972	2.80601	2.64845	2.58654	3.31418	3.11293	2.64958	14.8892	12.8083	15.2083	71.3575	65.6417	64.1	4.47688	5.24608	5.56116
1299	low	1	2014-07-01	2014	11	11	472.238	2.67416	3.12514	2.76243	0	3.25575	1	9.66	9.08	10.42	74.5203	76.1685	76.6972	2.80601	2.64845	2.58654	3.31418	3.11293	2.64958	14.8892	12.8083	15.2083	71.3575	65.6417	64.1	4.47688	5.24608	5.56116
1300	low	1	2014-07-01	2014	11	11	472.238	2.67416	3.12514	2.76243	1	3.25575	1	9.66	9.08	10.42	74.5203	76.1685	76.6972	2.80601	2.64845	2.58654	3.31418	3.11293	2.64958	14.8892	12.8083	15.2083	71.3575	65.6417	64.1	4.47688	5.24608	5.56116
1301	low	1	2014-07-01	2014	11	11	472.238	2.67416	3.12514	2.76243	0	3.25575	1	9.66	9.08	10.42	74.5203	76.1685	76.6972	2.80601	2.64845	2.58654	3.31418	3.11293	2.64958	14.8892	12.8083	15.2083	71.3575	65.6417	64.1	4.47688	5.24608	5.56116
1302	low	1	2014-07-01	2014	11	11	472.238	2.67416	3.12514	2.76243	0	3.25575	1	9.66	9.08	10.42	74.5203	76.1685	76.6972	2.80601	2.64845	2.58654	3.31418	3.11293	2.64958	14.8892	12.8083	15.2083	71.3575	65.6417	64.1	4.47688	5.24608	5.56116
1303	low	1	2014-07-01	2014	11	11	472.238	2.67416	3.12514	2.76243	0	3.25575	1	9.66	9.08	10.42	74.5203	76.1685	76.6972	2.80601	2.64845	2.58654	3.31418	3.11293	2.64958	14.8892	12.8083	15.2083	71.3575	65.6417	64.1	4.47688	5.24608	5.56116
1304	low	1	2014-07-01	2014	11	11	472.238	2.67416	3.12514	2.76243	0	3.25575	1	9.66	9.08	10.42	74.5203	76.1685	76.6972	2.80601	2.64845	2.58654	3.31418	3.11293	2.64958	14.8892	12.8083	15.2083	71.3575	65.6417	64.1	4.47688	5.24608	5.56116
1305	low	1	2014-07-01	2014	11	11	472.238	2.67416	3.12514	2.76243	0	3.25575	1	9.66	9.08	10.42	74.5203	76.1685	76.6972	2.80601	2.64845	2.58654	3.31418	3.11293	2.64958	14.8892	12.8083	15.2083	71.3575	65.6417	64.1	4.47688	5.24608	5.56116
1306	low	1	2014-07-01	2014	11	11	472.238	2.67416	3.12514	2.76243	0	3.25575	1	9.66	9.08	10.42	74.5203	76.1685	76.6972	2.80601	2.64845	2.58654	3.31418	3.11293	2.64958	14.8892	12.8083	15.2083	71.3575	65.6417	64.1	4.47688	5.24608	5.56116
1307	low	1	2014-07-01	2014	11	11	472.238	2.67416	3.12514	2.76243	0	3.25575	1	9.66	9.08	10.42	74.5203	76.1685	76.6972	2.80601	2.64845	2.58654	3.31418	3.11293	2.64958	14.8892	12.8083	15.2083	71.3575	65.6417	64.1	4.47688	5.24608	5.56116
1308	low	1	2014-07-25	2014	11	11	472.238	2.67416	3.12514	2.76243	1	3.25285	1	9.66	9.08	10.42	74.5203	76.1685	76.6972	2.80601	2.64845	2.58654	3.31418	3.11293	2.64958	14.8892	12.8083	15.2083	71.3575	65.6417	64.1	4.47688	5.24608	5.56116
1309	low	1	2014-07-25	2014	11	11	472.238	2.67416	3.12514	2.76243	0	3.25285	1	9.66	9.08	10.42	74.5203	76.1685	76.6972	2.80601	2.64845	2.58654	3.31418	3.11293	2.64958	14.8892	12.8083	15.2083	71.3575	65.6417	64.1	4.47688	5.24608	5.56116
1310	low	1	2014-07-25	2014	11	11	472.238	2.67416	3.12514	2.76243	0	3.25285	1	9.66	9.08	10.42	74.5203	76.1685	76.6972	2.80601	2.64845	2.58654	3.31418	3.11293	2.64958	14.8892	12.8083	15.2083	71.3575	65.6417	64.1	4.47688	5.24608	5.56116
1311	low	1	2014-07-25	2014	11	11	472.238	2.67416	3.12514	2.76243	0	3.25285	1	9.66	9.08	10.42	74.5203	76.1685	76.6972	2.80601	2.64845	2.58654	3.31418	3.11293	2.64958	14.8892	12.8083	15.2083	71.3575	65.6417	64.1	4.47688	5.24608	5.56116
1312	low	1	2014-07-25	2014	11	11	472.238	2.67416	3.12514	2.76243	0	3.25285	1	9.66	9.08	10.42	74.5203	76.1685	76.6972	2.80601	2.64845	2.58654	3.31418	3.11293	2.64958	14.8892	12.8083	15.2083	71.3575	65.6417	64.1	4.47688	5.24608	5.56116
1313	low	1	2014-07-25	2014	11	11	472.238	2.67416	3.12514	2.76243	0	3.25285	1	9.66	9.08	10.42	74.5203	76.1685	76.6972	2.80601	2.64845	2.58654	3.31418	3.11293	2.64958	14.8892	12.8083	15.2083	71.3575	65.6417	64.1	4.47688	5.24608	5.56116
1314	low	1	2014-07-25	2014	11	11	472.238	2.67416	3.12514	2.76243	0	3.25285	1	9.66	9.08	10.42	74.5203	76.1685	76.6972	2.80601	2.64845	2.58654	3.31418	3.11293	2.64958	14.8892	12.8083	15.2083	71.3575	65.6417	64.1	4.47688	5.24608	5.56116
1315	low	1	2014-07-25	2014	11	11	472.238	2.67416	3.12514	2.76243	0	3.25285	1	9.66	9.08	10.42	74.5203	76.1685	76.6972	2.80601	2.64845	2.58654	3.31418	3.11293	2.64958	14.8892	12.8083	15.2083	71.3575	65.6417	64.1	4.47688	5.24608	5.56116
1316	low	1	2014-07-25	2014	11	11	472.238	2.67416	3.12514	2.76243	0	3.25285	1	9.66	9.08	10.42	74.5203	76.1685	76.6972	2.80601	2.64845	2.58654	3.31418	3.11293	2.64958	14.8892	12.8083	15.2083	71.3575	65.6417	64.1	4.47688	5.24608	5.56116
1317	low	1	2014-07-25	2014	11	11	472.238	2.67416	3.12514	2.76243	0	3.25285	1	9.66	9.08	10.42	74.5203	76.1685	76.6972	2.80601	2.64845	2.58654	3.31418	3.11293	2.64958	14.8892	12.8083	15.2083	71.3575	65.6417	64.1	4.47688	5.24608	5.56116
1318	low	1	2014-07-25	2014	11	11	472.238	2.67416	3.12514	2.76243	0	3.25285	1	9.66	9.08	10.42	74.5203	76.1685	76.6972	2.80601	2.64845	2.58654	3.31418	3.11293	2.64958	14.8892	12.8083	15.2083	71.3575	65.6417	64.1	4.47688	5.24608	5.56116
1319	low	1	2014-07-25	2014	11	11	472.238	2.67416	3.12514	2.76243	0	3.25285	1	9.66	9.08	10.42	74.5203	76.1685	76.6972	2.80601	2.64845	2.58654	3.31418	3.11293	2.64958	14.8892	12.8083	15.2083	71.3575	65.6417	64.1	4.47688	5.24608	5.56116
1320	low	1	2014-07-25	2014	11	11	472.238	2.67416	3.12514	2.76243	0	3.25285	1	9.66	9.08	10.42	74.5203	76.1685	76.6972	2.80601	2.64845	2.58654	3.31418	3.11293	2.64958	14.8892	12.8083	15.2083	71.3575	65.6417	64.1	4.47688	5.24608	5.56116
1321	low	1	2014-07-25	2014	11	11	472.238	2.67416	3.12514	2.76243	0	3.25285	1	9.66	9.08	10.42	74.5203	76.1685	76.6972	2.80601	2.64845	2.58654	3.31418	3.11293	2.64958	14.8892	12.8083	15.2083	71.3575	65.6417	64.1	4.47688	5.24608	5.56116
1322	low	1	2014-07-25	2014	11	11	472.238	2.67416	3.12514	2.76243	0	3.25285	1	9.66	9.08	10.42	74.5203	76.1685	76.6972	2.80601	2.64845	2.58654	3.31418	3.11293	2.64958	14.8892	12.8083	15.2083	71.3575	65.6417	64.1	4.47688	5.24608	5.56116
1323	low	1	2014-07-25	2014	11	11	472.238	2.67416	3.12514	2.76243	0	3.25285	1	9.66	9.08	10.42	74.5203	76.1685	76.6972	2.80601	2.64845	2.58654	3.31418	3.11293	2.64958	14.8892	12.8083	15.2083	71.3575	65.6417	64.1	4.47688	5.24608	5.56116
1324	low	1	2014-08-28	2014	11	11	472.238	2.67416	3.12514	2.76243	0	3.23426	1	9.66	9.08	10.42	74.5203	76.1685	76.6972	2.80601	2.64845	2.58654	3.31418	3.11293	2.64958	14.8892	12.8083	15.2083	71.3575	65.6417	64.1	4.47688	5.24608	5.56116
1325	low	1	2014-08-28	2014	11	11	472.238	2.67416	3.12514	2.76243	0	3.23426	1	9.66	9.08	10.42	74.5203	76.1685	76.6972	2.80601	2.64845	2.58654	3.31418	3.11293	2.64958	14.8892	12.8083	15.2083	71.3575	65.6417	64.1	4.47688	5.24608	5.56116
1326	low	1	2014-08-28	2014	11	11	472.238	2.67416	3.12514	2.76243	0	3.23426	1	9.66	9.08	10.42	74.5203	76.1685	76.6972	2.80601	2.64845	2.58654	3.31418	3.11293	2.64958	14.8892	12.8083	15.2083	71.3575	65.6417	64.1	4.47688	5.24608	5.56116
1327	low	1	2014-08-28	2014	11	11	472.238	2.67416	3.12514	2.76243	0	3.23426	1	9.66	9.08	10.42	74.5203	76.1685	76.6972	2.80601	2.64845	2.58654	3.31418	3.11293	2.64958	14.8892	12.8083	15.2083	71.3575	65.6417	64.1	4.47688	5.24608	5.56116
1328	low	1	2014-08-28	2014	11	11	472.238	2.67416	3.12514	2.76243	0	3.23426	1	9.66	9.08	10.42	74.5203	76.1685	76.6972	2.80601	2.64845	2.58654	3.31418	3.11293	2.64958	14.8892	12.8083	15.2083	71.3575	65.6417	64.1	4.47688	5.24608	5.56116
1329	low	1	2014-08-28	2014	11	11	472.238	2.67416	3.12514	2.76243	0	3.23426	1	9.66	9.08	10.42	74.5203	76.1685	76.6972	2.80601	2.64845	2.58654	3.31418	3.11293	2.64958	14.8892	12.8083	15.2083	71.3575	65.6417	64.1	4.47688	5.24608	5.56116
1330	low	1	2014-08-28	2014	11	11	472.238	2.67416	3.12514	2.76243	1	3.23426	1	9.66	9.08	10.42	74.5203	76.1685	76.6972	2.80601	2.64845	2.58654	3.31418	3.11293	2.64958	14.8892	12.8083	15.2083	71.3575	65.6417	64.1	4.47688	5.24608	5.56116
1331	low	1	2014-08-28	2014	11	11	472.238	2.67416	3.12514	2.76243	0	3.23426	1	9.66	9.08	10.42	74.5203	76.1685	76.6972	2.80601	2.64845	2.58654	3.31418	3.11293	2.64958	14.8892	12.8083	15.2083	71.3575	65.6417	64.1	4.47688	5.24608	5.56116
1332	low	1	2014-08-28	2014	11	11	472.238	2.67416	3.12514	2.76243	0	3.23426	1	9.66	9.08	10.42	74.5203	76.1685	76.6972	2.80601	2.64845	2.58654	3.31418	3.11293	2.64958	14.8892	12.8083	15.2083	71.3575	65.6417	64.1	4.47688	5.24608	5.56116
1333	low	1	2014-08-28	2014	11	11	472.238	2.67416	3.12514	2.76243	0	3.23426	1	9.66	9.08	10.42	74.5203	76.1685	76.6972	2.80601	2.64845	2.58654	3.31418	3.11293	2.64958	14.8892	12.8083	15.2083	71.3575	65.6417	64.1	4.47688	5.24608	5.56116
1334	low	1	2014-08-28	2014	11	11	472.238	2.67416	3.12514	2.76243	0	3.23426	1	9.66	9.08	10.42	74.5203	76.1685	76.6972	2.80601	2.64845	2.58654	3.31418	3.11293	2.64958	14.8892	12.8083	15.2083	71.3575	65.6417	64.1	4.47688	5.24608	5.56116
1335	low	1	2014-08-28	2014	11	11	472.238	2.67416	3.12514	2.76243	0	3.23426	1	9.66	9.08	10.42	74.5203	76.1685	76.6972	2.80601	2.64845	2.58654	3.31418	3.11293	2.64958	14.8892	12.8083	15.2083	71.3575	65.6417	64.1	4.47688	5.24608	5.56116
1336	low	1	2014-08-28	2014	11	11	472.238	2.67416	3.12514	2.76243	0	3.23426	1	9.66	9.08	10.42	74.5203	76.1685	76.6972	2.80601	2.64845	2.58654	3.31418	3.11293	2.64958	14.8892	12.8083	15.2083	71.3575	65.6417	64.1	4.47688	5.24608	5.56116
1337	low	1	2014-08-28	2014	11	11	472.238	2.67416	3.12514	2.76243	0	3.23426	1	9.66	9.08	10.42	74.5203	76.1685	76.6972	2.80601	2.64845	2.58654	3.31418	3.11293	2.64958	14.8892	12.8083	15.2083	71.3575	65.6417	64.1	4.47688	5.24608	5.56116
1338	low	1	2014-08-28	2014	11	11	472.238	2.67416	3.12514	2.76243	0	3.23426	1	9.66	9.08	10.42	74.5203	76.1685	76.6972	2.80601	2.64845	2.58654	3.31418	3.11293	2.64958	14.8892	12.8083	15.2083	71.3575	65.6417	64.1	4.47688	5.24608	5.56116
1339	low	1	2014-08-28	2014	11	11	472.238	2.67416	3.12514	2.76243	0	3.23426	1	9.66	9.08	10.42	74.5203	76.1685	76.6972	2.80601	2.64845	2.58654	3.31418	3.11293	2.64958	14.8892	12.8083	15.2083	71.3575	65.6417	64.1	4.47688	5.24608	5.56116
1340	low	1	2014-08-28	2014	11	11	472.238	2.67416	3.12514	2.76243	0	3.23426	1	9.66	9.08	10.42	74.5203	76.1685	76.6972	2.80601	2.64845	2.58654	3.31418	3.11293	2.64958	14.8892	12.8083	15.2083	71.3575	65.6417	64.1	4.47688	5.24608	5.56116
1341	low	1	2014-08-28	2014	11	11	472.238	2.67416	3.12514	2.76243	0	3.23426	1	9.66	9.08	10.42	74.5203	76.1685	76.6972	2.80601	2.64845	2.58654	3.31418	3.11293	2.64958	14.8892	12.8083	15.2083	71.3575	65.6417	64.1	4.47688	5.24608	5.56116
1342	low	1	2014-08-28	2014	11	11	472.238	2.67416	3.12514	2.76243	0	3.23426	1	9.66	9.08	10.42	74.5203	76.1685	76.6972	2.80601	2.64845	2.58654	3.31418	3.11293	2.64958	14.8892	12.8083	15.2083	71.3575	65.6417	64.1	4.47688	5.24608	5.56116
1343	low	1	2014-08-28	2014	11	11	472.238	2.67416	3.12514	2.76243	0	3.23426	1	9.66	9.08	10.42	74.5203	76.1685	76.6972	2.80601	2.64845	2.58654	3.31418	3.11293	2.64958	14.8892	12.8083	15.2083	71.3575	65.6417	64.1	4.47688	5.24608	5.56116
1344	low	1	2014-09-26	2014	11	11	472.238	2.67416	3.12514	2.76243	0	3.2413	1	9.66	9.08	10.42	74.5203	76.1685	76.6972	2.80601	2.64845	2.58654	3.31418	3.11293	2.64958	14.8892	12.8083	15.2083	71.3575	65.6417	64.1	4.47688	5.24608	5.56116
1345	low	1	2014-09-26	2014	11	11	472.238	2.67416	3.12514	2.76243	0	3.2413	1	9.66	9.08	10.42	74.5203	76.1685	76.6972	2.80601	2.64845	2.58654	3.31418	3.11293	2.64958	14.8892	12.8083	15.2083	71.3575	65.6417	64.1	4.47688	5.24608	5.56116
1346	low	1	2014-09-26	2014	11	11	472.238	2.67416	3.12514	2.76243	0	3.2413	1	9.66	9.08	10.42	74.5203	76.1685	76.6972	2.80601	2.64845	2.58654	3.31418	3.11293	2.64958	14.8892	12.8083	15.2083	71.3575	65.6417	64.1	4.47688	5.24608	5.56116
1347	low	1	2014-09-26	2014	11	11	472.238	2.67416	3.12514	2.76243	0	3.2413	1	9.66	9.08	10.42	74.5203	76.1685	76.6972	2.80601	2.64845	2.58654	3.31418	3.11293	2.64958	14.8892	12.8083	15.2083	71.3575	65.6417	64.1	4.47688	5.24608	5.56116
1348	low	1	2014-09-26	2014	11	11	472.238	2.67416	3.12514	2.76243	0	3.2413	1	9.66	9.08	10.42	74.5203	76.1685	76.6972	2.80601	2.64845	2.58654	3.31418	3.11293	2.64958	14.8892	12.8083	15.2083	71.3575	65.6417	64.1	4.47688	5.24608	5.56116
1349	low	1	2014-09-26	2014	11	11	472.238	2.67416	3.12514	2.76243	0	3.2413	1	9.66	9.08	10.42	74.5203	76.1685	76.6972	2.80601	2.64845	2.58654	3.31418	3.11293	2.64958	14.8892	12.8083	15.2083	71.3575	65.6417	64.1	4.47688	5.24608	5.56116
1350	low	1	2014-09-26	2014	11	11	472.238	2.67416	3.12514	2.76243	0	3.2413	1	9.66	9.08	10.42	74.5203	76.1685	76.6972	2.80601	2.64845	2.58654	3.31418	3.11293	2.64958	14.8892	12.8083	15.2083	71.3575	65.6417	64.1	4.47688	5.24608	5.56116
1351	low	1	2014-09-26	2014	11	11	472.238	2.67416	3.12514	2.76243	0	3.2413	1	9.66	9.08	10.42	74.5203	76.1685	76.6972	2.80601	2.64845	2.58654	3.31418	3.11293	2.64958	14.8892	12.8083	15.2083	71.3575	65.6417	64.1	4.47688	5.24608	5.56116
1352	low	1	2014-09-26	2014	11	11	472.238	2.67416	3.12514	2.76243	0	3.2413	1	9.66	9.08	10.42	74.5203	76.1685	76.6972	2.80601	2.64845	2.58654	3.31418	3.11293	2.64958	14.8892	12.8083	15.2083	71.3575	65.6417	64.1	4.47688	5.24608	5.56116
1353	low	1	2014-09-26	2014	11	11	472.238	2.67416	3.12514	2.76243	0	3.2413	1	9.66	9.08	10.42	74.5203	76.1685	76.6972	2.80601	2.64845	2.58654	3.31418	3.11293	2.64958	14.8892	12.8083	15.2083	71.3575	65.6417	64.1	4.47688	5.24608	5.56116
1354	low	1	2014-09-26	2014	11	11	472.238	2.67416	3.12514	2.76243	0	3.2413	1	9.66	9.08	10.42	74.5203	76.1685	76.6972	2.80601	2.64845	2.58654	3.31418	3.11293	2.64958	14.8892	12.8083	15.2083	71.3575	65.6417	64.1	4.47688	5.24608	5.56116
1355	low	1	2014-09-26	2014	11	11	472.238	2.67416	3.12514	2.76243	0	3.2413	1	9.66	9.08	10.42	74.5203	76.1685	76.6972	2.80601	2.64845	2.58654	3.31418	3.11293	2.64958	14.8892	12.8083	15.2083	71.3575	65.6417	64.1	4.47688	5.24608	5.56116
1356	low	1	2014-09-26	2014	11	11	472.238	2.67416	3.12514	2.76243	0	3.2413	1	9.66	9.08	10.42	74.5203	76.1685	76.6972	2.80601	2.64845	2.58654	3.31418	3.11293	2.64958	14.8892	12.8083	15.2083	71.3575	65.6417	64.1	4.47688	5.24608	5.56116
1357	low	1	2014-09-26	2014	11	11	472.238	2.67416	3.12514	2.76243	0	3.2413	1	9.66	9.08	10.42	74.5203	76.1685	76.6972	2.80601	2.64845	2.58654	3.31418	3.11293	2.64958	14.8892	12.8083	15.2083	71.3575	65.6417	64.1	4.47688	5.24608	5.56116
1358	low	1	2014-09-26	2014	11	11	472.238	2.67416	3.12514	2.76243	0	3.2413	1	9.66	9.08	10.42	74.5203	76.1685	76.6972	2.80601	2.64845	2.58654	3.31418	3.11293	2.64958	14.8892	12.8083	15.2083	71.3575	65.6417	64.1	4.47688	5.24608	5.56116
1359	low	1	2014-09-26	2014	11	11	472.238	2.67416	3.12514	2.76243	0	3.2413	1	9.66	9.08	10.42	74.5203	76.1685	76.6972	2.80601	2.64845	2.58654	3.31418	3.11293	2.64958	14.8892	12.8083	15.2083	71.3575	65.6417	64.1	4.47688	5.24608	5.56116
1360	low	1	2014-09-26	2014	11	11	472.238	2.67416	3.12514	2.76243	1	3.2413	1	9.66	9.08	10.42	74.5203	76.1685	76.6972	2.80601	2.64845	2.58654	3.31418	3.11293	2.64958	14.8892	12.8083	15.2083	71.3575	65.6417	64.1	4.47688	5.24608	5.56116
1361	low	1	2014-09-26	2014	11	11	472.238	2.67416	3.12514	2.76243	0	3.2413	1	9.66	9.08	10.42	74.5203	76.1685	76.6972	2.80601	2.64845	2.58654	3.31418	3.11293	2.64958	14.8892	12.8083	15.2083	71.3575	65.6417	64.1	4.47688	5.24608	5.56116
1362	low	1	2014-09-26	2014	11	11	472.238	2.67416	3.12514	2.76243	0	3.2413	1	9.66	9.08	10.42	74.5203	76.1685	76.6972	2.80601	2.64845	2.58654	3.31418	3.11293	2.64958	14.8892	12.8083	15.2083	71.3575	65.6417	64.1	4.47688	5.24608	5.56116
1363	low	1	2014-09-26	2014	11	11	472.238	2.67416	3.12514	2.76243	1	3.2413	1	9.66	9.08	10.42	74.5203	76.1685	76.6972	2.80601	2.64845	2.58654	3.31418	3.11293	2.64958	14.8892	12.8083	15.2083	71.3575	65.6417	64.1	4.47688	5.24608	5.56116
1364	low	1	2014-10-28	2014	11	11	472.238	2.67416	3.12514	2.76243	0	3.23654	1	9.66	9.08	10.42	74.5203	76.1685	76.6972	2.80601	2.64845	2.58654	3.31418	3.11293	2.64958	14.8892	12.8083	15.2083	71.3575	65.6417	64.1	4.47688	5.24608	5.56116
1365	low	1	2014-10-28	2014	11	11	472.238	2.67416	3.12514	2.76243	0	3.23654	1	9.66	9.08	10.42	74.5203	76.1685	76.6972	2.80601	2.64845	2.58654	3.31418	3.11293	2.64958	14.8892	12.8083	15.2083	71.3575	65.6417	64.1	4.47688	5.24608	5.56116
1366	low	1	2014-10-28	2014	11	11	472.238	2.67416	3.12514	2.76243	0	3.23654	1	9.66	9.08	10.42	74.5203	76.1685	76.6972	2.80601	2.64845	2.58654	3.31418	3.11293	2.64958	14.8892	12.8083	15.2083	71.3575	65.6417	64.1	4.47688	5.24608	5.56116
1367	low	1	2014-10-28	2014	11	11	472.238	2.67416	3.12514	2.76243	0	3.23654	1	9.66	9.08	10.42	74.5203	76.1685	76.6972	2.80601	2.64845	2.58654	3.31418	3.11293	2.64958	14.8892	12.8083	15.2083	71.3575	65.6417	64.1	4.47688	5.24608	5.56116
1368	low	1	2014-10-28	2014	11	11	472.238	2.67416	3.12514	2.76243	0	3.23654	1	9.66	9.08	10.42	74.5203	76.1685	76.6972	2.80601	2.64845	2.58654	3.31418	3.11293	2.64958	14.8892	12.8083	15.2083	71.3575	65.6417	64.1	4.47688	5.24608	5.56116
1369	low	1	2014-10-28	2014	11	11	472.238	2.67416	3.12514	2.76243	0	3.23654	1	9.66	9.08	10.42	74.5203	76.1685	76.6972	2.80601	2.64845	2.58654	3.31418	3.11293	2.64958	14.8892	12.8083	15.2083	71.3575	65.6417	64.1	4.47688	5.24608	5.56116
1370	low	1	2014-10-28	2014	11	11	472.238	2.67416	3.12514	2.76243	0	3.23654	1	9.66	9.08	10.42	74.5203	76.1685	76.6972	2.80601	2.64845	2.58654	3.31418	3.11293	2.64958	14.8892	12.8083	15.2083	71.3575	65.6417	64.1	4.47688	5.24608	5.56116
1371	low	1	2014-10-28	2014	11	11	472.238	2.67416	3.12514	2.76243	0	3.23654	1	9.66	9.08	10.42	74.5203	76.1685	76.6972	2.80601	2.64845	2.58654	3.31418	3.11293	2.64958	14.8892	12.8083	15.2083	71.3575	65.6417	64.1	4.47688	5.24608	5.56116
1372	low	1	2014-10-28	2014	11	11	472.238	2.67416	3.12514	2.76243	0	3.23654	1	9.66	9.08	10.42	74.5203	76.1685	76.6972	2.80601	2.64845	2.58654	3.31418	3.11293	2.64958	14.8892	12.8083	15.2083	71.3575	65.6417	64.1	4.47688	5.24608	5.56116
1373	low	1	2014-10-28	2014	11	11	472.238	2.67416	3.12514	2.76243	0	3.23654	1	9.66	9.08	10.42	74.5203	76.1685	76.6972	2.80601	2.64845	2.58654	3.31418	3.11293	2.64958	14.8892	12.8083	15.2083	71.3575	65.6417	64.1	4.47688	5.24608	5.56116
1374	low	1	2014-10-28	2014	11	11	472.238	2.67416	3.12514	2.76243	0	3.23654	1	9.66	9.08	10.42	74.5203	76.1685	76.6972	2.80601	2.64845	2.58654	3.31418	3.11293	2.64958	14.8892	12.8083	15.2083	71.3575	65.6417	64.1	4.47688	5.24608	5.56116
1375	low	1	2014-10-28	2014	11	11	472.238	2.67416	3.12514	2.76243	0	3.23654	1	9.66	9.08	10.42	74.5203	76.1685	76.6972	2.80601	2.64845	2.58654	3.31418	3.11293	2.64958	14.8892	12.8083	15.2083	71.3575	65.6417	64.1	4.47688	5.24608	5.56116
1376	low	1	2014-10-28	2014	11	11	472.238	2.67416	3.12514	2.76243	0	3.23654	1	9.66	9.08	10.42	74.5203	76.1685	76.6972	2.80601	2.64845	2.58654	3.31418	3.11293	2.64958	14.8892	12.8083	15.2083	71.3575	65.6417	64.1	4.47688	5.24608	5.56116
1377	low	1	2014-10-28	2014	11	11	472.238	2.67416	3.12514	2.76243	0	3.23654	1	9.66	9.08	10.42	74.5203	76.1685	76.6972	2.80601	2.64845	2.58654	3.31418	3.11293	2.64958	14.8892	12.8083	15.2083	71.3575	65.6417	64.1	4.47688	5.24608	5.56116
1378	low	1	2014-10-28	2014	11	11	472.238	2.67416	3.12514	2.76243	0	3.23654	1	9.66	9.08	10.42	74.5203	76.1685	76.6972	2.80601	2.64845	2.58654	3.31418	3.11293	2.64958	14.8892	12.8083	15.2083	71.3575	65.6417	64.1	4.47688	5.24608	5.56116
1379	low	1	2014-10-28	2014	11	11	472.238	2.67416	3.12514	2.76243	0	3.23654	1	9.66	9.08	10.42	74.5203	76.1685	76.6972	2.80601	2.64845	2.58654	3.31418	3.11293	2.64958	14.8892	12.8083	15.2083	71.3575	65.6417	64.1	4.47688	5.24608	5.56116
1380	low	1	2014-10-28	2014	11	11	472.238	2.67416	3.12514	2.76243	0	3.23654	1	9.66	9.08	10.42	74.5203	76.1685	76.6972	2.80601	2.64845	2.58654	3.31418	3.11293	2.64958	14.8892	12.8083	15.2083	71.3575	65.6417	64.1	4.47688	5.24608	5.56116
1381	low	1	2014-10-28	2014	11	11	472.238	2.67416	3.12514	2.76243	0	3.23654	1	9.66	9.08	10.42	74.5203	76.1685	76.6972	2.80601	2.64845	2.58654	3.31418	3.11293	2.64958	14.8892	12.8083	15.2083	71.3575	65.6417	64.1	4.47688	5.24608	5.56116
1382	low	1	2014-10-28	2014	11	11	472.238	2.67416	3.12514	2.76243	0	3.23654	1	9.66	9.08	10.42	74.5203	76.1685	76.6972	2.80601	2.64845	2.58654	3.31418	3.11293	2.64958	14.8892	12.8083	15.2083	71.3575	65.6417	64.1	4.47688	5.24608	5.56116
1383	low	1	2014-10-28	2014	11	11	472.238	2.67416	3.12514	2.76243	0	3.23654	1	9.66	9.08	10.42	74.5203	76.1685	76.6972	2.80601	2.64845	2.58654	3.31418	3.11293	2.64958	14.8892	12.8083	15.2083	71.3575	65.6417	64.1	4.47688	5.24608	5.56116
1384	low	1	2014-11-20	2014	11	11	472.238	2.67416	3.12514	2.76243	0	3.23198	1	9.66	9.08	10.42	74.5203	76.1685	76.6972	2.80601	2.64845	2.58654	3.31418	3.11293	2.64958	14.8892	12.8083	15.2083	71.3575	65.6417	64.1	4.47688	5.24608	5.56116
1385	low	1	2014-11-20	2014	11	11	472.238	2.67416	3.12514	2.76243	0	3.23198	1	9.66	9.08	10.42	74.5203	76.1685	76.6972	2.80601	2.64845	2.58654	3.31418	3.11293	2.64958	14.8892	12.8083	15.2083	71.3575	65.6417	64.1	4.47688	5.24608	5.56116
1386	low	1	2014-11-20	2014	11	11	472.238	2.67416	3.12514	2.76243	0	3.23198	1	9.66	9.08	10.42	74.5203	76.1685	76.6972	2.80601	2.64845	2.58654	3.31418	3.11293	2.64958	14.8892	12.8083	15.2083	71.3575	65.6417	64.1	4.47688	5.24608	5.56116
1387	low	1	2014-11-20	2014	11	11	472.238	2.67416	3.12514	2.76243	0	3.23198	1	9.66	9.08	10.42	74.5203	76.1685	76.6972	2.80601	2.64845	2.58654	3.31418	3.11293	2.64958	14.8892	12.8083	15.2083	71.3575	65.6417	64.1	4.47688	5.24608	5.56116
1388	low	1	2014-11-20	2014	11	11	472.238	2.67416	3.12514	2.76243	0	3.23198	1	9.66	9.08	10.42	74.5203	76.1685	76.6972	2.80601	2.64845	2.58654	3.31418	3.11293	2.64958	14.8892	12.8083	15.2083	71.3575	65.6417	64.1	4.47688	5.24608	5.56116
1389	low	1	2014-11-20	2014	11	11	472.238	2.67416	3.12514	2.76243	0	3.23198	1	9.66	9.08	10.42	74.5203	76.1685	76.6972	2.80601	2.64845	2.58654	3.31418	3.11293	2.64958	14.8892	12.8083	15.2083	71.3575	65.6417	64.1	4.47688	5.24608	5.56116
1390	low	1	2014-11-20	2014	11	11	472.238	2.67416	3.12514	2.76243	0	3.23198	1	9.66	9.08	10.42	74.5203	76.1685	76.6972	2.80601	2.64845	2.58654	3.31418	3.11293	2.64958	14.8892	12.8083	15.2083	71.3575	65.6417	64.1	4.47688	5.24608	5.56116
1391	low	1	2014-11-20	2014	11	11	472.238	2.67416	3.12514	2.76243	0	3.23198	1	9.66	9.08	10.42	74.5203	76.1685	76.6972	2.80601	2.64845	2.58654	3.31418	3.11293	2.64958	14.8892	12.8083	15.2083	71.3575	65.6417	64.1	4.47688	5.24608	5.56116
1392	low	1	2014-11-20	2014	11	11	472.238	2.67416	3.12514	2.76243	0	3.23198	1	9.66	9.08	10.42	74.5203	76.1685	76.6972	2.80601	2.64845	2.58654	3.31418	3.11293	2.64958	14.8892	12.8083	15.2083	71.3575	65.6417	64.1	4.47688	5.24608	5.56116
1393	low	1	2014-11-20	2014	11	11	472.238	2.67416	3.12514	2.76243	0	3.23198	1	9.66	9.08	10.42	74.5203	76.1685	76.6972	2.80601	2.64845	2.58654	3.31418	3.11293	2.64958	14.8892	12.8083	15.2083	71.3575	65.6417	64.1	4.47688	5.24608	5.56116
1394	low	1	2015-03-19	2015	12	12	4620.15	3.66466	2.67416	15.0538	0	1.43136	2	9.08	10.42	10.5817	76.1685	76.6972	71.9883	2.64845	2.58654	3.46249	3.11293	2.64958	2.23265	12.8083	15.2083	15.5758	65.6417	64.1	59.7675	5.24608	5.56116	6.45619
1395	low	1	2015-03-19	2015	12	12	4620.15	3.66466	2.67416	15.0538	0	1.43136	2	9.08	10.42	10.5817	76.1685	76.6972	71.9883	2.64845	2.58654	3.46249	3.11293	2.64958	2.23265	12.8083	15.2083	15.5758	65.6417	64.1	59.7675	5.24608	5.56116	6.45619
1396	low	1	2015-03-19	2015	12	12	4620.15	3.66466	2.67416	15.0538	0	1.43136	2	9.08	10.42	10.5817	76.1685	76.6972	71.9883	2.64845	2.58654	3.46249	3.11293	2.64958	2.23265	12.8083	15.2083	15.5758	65.6417	64.1	59.7675	5.24608	5.56116	6.45619
1397	low	1	2015-03-19	2015	12	12	4620.15	3.66466	2.67416	15.0538	0	1.43136	2	9.08	10.42	10.5817	76.1685	76.6972	71.9883	2.64845	2.58654	3.46249	3.11293	2.64958	2.23265	12.8083	15.2083	15.5758	65.6417	64.1	59.7675	5.24608	5.56116	6.45619
1398	low	1	2015-03-19	2015	12	12	4620.15	3.66466	2.67416	15.0538	0	1.43136	2	9.08	10.42	10.5817	76.1685	76.6972	71.9883	2.64845	2.58654	3.46249	3.11293	2.64958	2.23265	12.8083	15.2083	15.5758	65.6417	64.1	59.7675	5.24608	5.56116	6.45619
1399	low	1	2015-03-19	2015	12	12	4620.15	3.66466	2.67416	15.0538	1	1.43136	2	9.08	10.42	10.5817	76.1685	76.6972	71.9883	2.64845	2.58654	3.46249	3.11293	2.64958	2.23265	12.8083	15.2083	15.5758	65.6417	64.1	59.7675	5.24608	5.56116	6.45619
1400	low	1	2015-03-19	2015	12	12	4620.15	3.66466	2.67416	15.0538	0	1.43136	2	9.08	10.42	10.5817	76.1685	76.6972	71.9883	2.64845	2.58654	3.46249	3.11293	2.64958	2.23265	12.8083	15.2083	15.5758	65.6417	64.1	59.7675	5.24608	5.56116	6.45619
1401	low	1	2015-03-19	2015	12	12	4620.15	3.66466	2.67416	15.0538	1	1.43136	2	9.08	10.42	10.5817	76.1685	76.6972	71.9883	2.64845	2.58654	3.46249	3.11293	2.64958	2.23265	12.8083	15.2083	15.5758	65.6417	64.1	59.7675	5.24608	5.56116	6.45619
1402	low	1	2015-03-19	2015	12	12	4620.15	3.66466	2.67416	15.0538	0	1.43136	2	9.08	10.42	10.5817	76.1685	76.6972	71.9883	2.64845	2.58654	3.46249	3.11293	2.64958	2.23265	12.8083	15.2083	15.5758	65.6417	64.1	59.7675	5.24608	5.56116	6.45619
1403	low	1	2015-03-19	2015	12	12	4620.15	3.66466	2.67416	15.0538	0	1.43136	2	9.08	10.42	10.5817	76.1685	76.6972	71.9883	2.64845	2.58654	3.46249	3.11293	2.64958	2.23265	12.8083	15.2083	15.5758	65.6417	64.1	59.7675	5.24608	5.56116	6.45619
1404	low	1	2015-03-19	2015	12	12	4620.15	3.66466	2.67416	15.0538	0	1.43136	2	9.08	10.42	10.5817	76.1685	76.6972	71.9883	2.64845	2.58654	3.46249	3.11293	2.64958	2.23265	12.8083	15.2083	15.5758	65.6417	64.1	59.7675	5.24608	5.56116	6.45619
1405	low	1	2015-03-19	2015	12	12	4620.15	3.66466	2.67416	15.0538	1	1.43136	2	9.08	10.42	10.5817	76.1685	76.6972	71.9883	2.64845	2.58654	3.46249	3.11293	2.64958	2.23265	12.8083	15.2083	15.5758	65.6417	64.1	59.7675	5.24608	5.56116	6.45619
1406	low	1	2015-03-19	2015	12	12	4620.15	3.66466	2.67416	15.0538	0	1.43136	2	9.08	10.42	10.5817	76.1685	76.6972	71.9883	2.64845	2.58654	3.46249	3.11293	2.64958	2.23265	12.8083	15.2083	15.5758	65.6417	64.1	59.7675	5.24608	5.56116	6.45619
1407	low	1	2015-03-19	2015	12	12	4620.15	3.66466	2.67416	15.0538	0	1.43136	2	9.08	10.42	10.5817	76.1685	76.6972	71.9883	2.64845	2.58654	3.46249	3.11293	2.64958	2.23265	12.8083	15.2083	15.5758	65.6417	64.1	59.7675	5.24608	5.56116	6.45619
1408	low	1	2015-03-19	2015	12	12	4620.15	3.66466	2.67416	15.0538	0	1.43136	2	9.08	10.42	10.5817	76.1685	76.6972	71.9883	2.64845	2.58654	3.46249	3.11293	2.64958	2.23265	12.8083	15.2083	15.5758	65.6417	64.1	59.7675	5.24608	5.56116	6.45619
1409	low	1	2015-03-19	2015	12	12	4620.15	3.66466	2.67416	15.0538	0	1.43136	2	9.08	10.42	10.5817	76.1685	76.6972	71.9883	2.64845	2.58654	3.46249	3.11293	2.64958	2.23265	12.8083	15.2083	15.5758	65.6417	64.1	59.7675	5.24608	5.56116	6.45619
1410	low	1	2015-03-19	2015	12	12	4620.15	3.66466	2.67416	15.0538	0	1.43136	2	9.08	10.42	10.5817	76.1685	76.6972	71.9883	2.64845	2.58654	3.46249	3.11293	2.64958	2.23265	12.8083	15.2083	15.5758	65.6417	64.1	59.7675	5.24608	5.56116	6.45619
1411	low	1	2015-03-19	2015	12	12	4620.15	3.66466	2.67416	15.0538	0	1.43136	2	9.08	10.42	10.5817	76.1685	76.6972	71.9883	2.64845	2.58654	3.46249	3.11293	2.64958	2.23265	12.8083	15.2083	15.5758	65.6417	64.1	59.7675	5.24608	5.56116	6.45619
1412	low	1	2015-03-19	2015	12	12	4620.15	3.66466	2.67416	15.0538	0	1.43136	2	9.08	10.42	10.5817	76.1685	76.6972	71.9883	2.64845	2.58654	3.46249	3.11293	2.64958	2.23265	12.8083	15.2083	15.5758	65.6417	64.1	59.7675	5.24608	5.56116	6.45619
1413	low	1	2015-03-19	2015	12	12	4620.15	3.66466	2.67416	15.0538	0	1.43136	2	9.08	10.42	10.5817	76.1685	76.6972	71.9883	2.64845	2.58654	3.46249	3.11293	2.64958	2.23265	12.8083	15.2083	15.5758	65.6417	64.1	59.7675	5.24608	5.56116	6.45619
1414	low	1	2015-04-22	2015	12	12	4620.15	3.66466	2.67416	15.0538	0	0.69897	2	9.08	10.42	10.5817	76.1685	76.6972	71.9883	2.64845	2.58654	3.46249	3.11293	2.64958	2.23265	12.8083	15.2083	15.5758	65.6417	64.1	59.7675	5.24608	5.56116	6.45619
1415	low	1	2015-04-22	2015	12	12	4620.15	3.66466	2.67416	15.0538	0	0.69897	2	9.08	10.42	10.5817	76.1685	76.6972	71.9883	2.64845	2.58654	3.46249	3.11293	2.64958	2.23265	12.8083	15.2083	15.5758	65.6417	64.1	59.7675	5.24608	5.56116	6.45619
1416	low	1	2015-04-22	2015	12	12	4620.15	3.66466	2.67416	15.0538	0	0.69897	2	9.08	10.42	10.5817	76.1685	76.6972	71.9883	2.64845	2.58654	3.46249	3.11293	2.64958	2.23265	12.8083	15.2083	15.5758	65.6417	64.1	59.7675	5.24608	5.56116	6.45619
1417	low	1	2015-04-22	2015	12	12	4620.15	3.66466	2.67416	15.0538	0	0.69897	2	9.08	10.42	10.5817	76.1685	76.6972	71.9883	2.64845	2.58654	3.46249	3.11293	2.64958	2.23265	12.8083	15.2083	15.5758	65.6417	64.1	59.7675	5.24608	5.56116	6.45619
1418	low	1	2015-04-22	2015	12	12	4620.15	3.66466	2.67416	15.0538	0	0.69897	2	9.08	10.42	10.5817	76.1685	76.6972	71.9883	2.64845	2.58654	3.46249	3.11293	2.64958	2.23265	12.8083	15.2083	15.5758	65.6417	64.1	59.7675	5.24608	5.56116	6.45619
1419	low	1	2015-04-22	2015	12	12	4620.15	3.66466	2.67416	15.0538	0	0.69897	2	9.08	10.42	10.5817	76.1685	76.6972	71.9883	2.64845	2.58654	3.46249	3.11293	2.64958	2.23265	12.8083	15.2083	15.5758	65.6417	64.1	59.7675	5.24608	5.56116	6.45619
1420	low	1	2015-04-22	2015	12	12	4620.15	3.66466	2.67416	15.0538	0	0.69897	2	9.08	10.42	10.5817	76.1685	76.6972	71.9883	2.64845	2.58654	3.46249	3.11293	2.64958	2.23265	12.8083	15.2083	15.5758	65.6417	64.1	59.7675	5.24608	5.56116	6.45619
1421	low	1	2015-04-22	2015	12	12	4620.15	3.66466	2.67416	15.0538	0	0.69897	2	9.08	10.42	10.5817	76.1685	76.6972	71.9883	2.64845	2.58654	3.46249	3.11293	2.64958	2.23265	12.8083	15.2083	15.5758	65.6417	64.1	59.7675	5.24608	5.56116	6.45619
1422	low	1	2015-04-22	2015	12	12	4620.15	3.66466	2.67416	15.0538	0	0.69897	2	9.08	10.42	10.5817	76.1685	76.6972	71.9883	2.64845	2.58654	3.46249	3.11293	2.64958	2.23265	12.8083	15.2083	15.5758	65.6417	64.1	59.7675	5.24608	5.56116	6.45619
1423	low	1	2015-04-22	2015	12	12	4620.15	3.66466	2.67416	15.0538	0	0.69897	2	9.08	10.42	10.5817	76.1685	76.6972	71.9883	2.64845	2.58654	3.46249	3.11293	2.64958	2.23265	12.8083	15.2083	15.5758	65.6417	64.1	59.7675	5.24608	5.56116	6.45619
1424	low	1	2015-04-22	2015	12	12	4620.15	3.66466	2.67416	15.0538	0	0.69897	2	9.08	10.42	10.5817	76.1685	76.6972	71.9883	2.64845	2.58654	3.46249	3.11293	2.64958	2.23265	12.8083	15.2083	15.5758	65.6417	64.1	59.7675	5.24608	5.56116	6.45619
1425	low	1	2015-04-22	2015	12	12	4620.15	3.66466	2.67416	15.0538	0	0.69897	2	9.08	10.42	10.5817	76.1685	76.6972	71.9883	2.64845	2.58654	3.46249	3.11293	2.64958	2.23265	12.8083	15.2083	15.5758	65.6417	64.1	59.7675	5.24608	5.56116	6.45619
1426	low	1	2015-04-22	2015	12	12	4620.15	3.66466	2.67416	15.0538	0	0.69897	2	9.08	10.42	10.5817	76.1685	76.6972	71.9883	2.64845	2.58654	3.46249	3.11293	2.64958	2.23265	12.8083	15.2083	15.5758	65.6417	64.1	59.7675	5.24608	5.56116	6.45619
1427	low	1	2015-04-22	2015	12	12	4620.15	3.66466	2.67416	15.0538	1	0.69897	2	9.08	10.42	10.5817	76.1685	76.6972	71.9883	2.64845	2.58654	3.46249	3.11293	2.64958	2.23265	12.8083	15.2083	15.5758	65.6417	64.1	59.7675	5.24608	5.56116	6.45619
1428	low	1	2015-04-22	2015	12	12	4620.15	3.66466	2.67416	15.0538	0	0.69897	2	9.08	10.42	10.5817	76.1685	76.6972	71.9883	2.64845	2.58654	3.46249	3.11293	2.64958	2.23265	12.8083	15.2083	15.5758	65.6417	64.1	59.7675	5.24608	5.56116	6.45619
1429	low	1	2015-04-22	2015	12	12	4620.15	3.66466	2.67416	15.0538	1	0.69897	2	9.08	10.42	10.5817	76.1685	76.6972	71.9883	2.64845	2.58654	3.46249	3.11293	2.64958	2.23265	12.8083	15.2083	15.5758	65.6417	64.1	59.7675	5.24608	5.56116	6.45619
1430	low	1	2015-04-22	2015	12	12	4620.15	3.66466	2.67416	15.0538	0	0.69897	2	9.08	10.42	10.5817	76.1685	76.6972	71.9883	2.64845	2.58654	3.46249	3.11293	2.64958	2.23265	12.8083	15.2083	15.5758	65.6417	64.1	59.7675	5.24608	5.56116	6.45619
1431	low	1	2015-04-22	2015	12	12	4620.15	3.66466	2.67416	15.0538	0	0.69897	2	9.08	10.42	10.5817	76.1685	76.6972	71.9883	2.64845	2.58654	3.46249	3.11293	2.64958	2.23265	12.8083	15.2083	15.5758	65.6417	64.1	59.7675	5.24608	5.56116	6.45619
1432	low	1	2015-04-22	2015	12	12	4620.15	3.66466	2.67416	15.0538	0	0.69897	2	9.08	10.42	10.5817	76.1685	76.6972	71.9883	2.64845	2.58654	3.46249	3.11293	2.64958	2.23265	12.8083	15.2083	15.5758	65.6417	64.1	59.7675	5.24608	5.56116	6.45619
1433	low	1	2015-04-22	2015	12	12	4620.15	3.66466	2.67416	15.0538	0	0.69897	2	9.08	10.42	10.5817	76.1685	76.6972	71.9883	2.64845	2.58654	3.46249	3.11293	2.64958	2.23265	12.8083	15.2083	15.5758	65.6417	64.1	59.7675	5.24608	5.56116	6.45619
1434	low	1	2015-05-28	2015	12	12	4620.15	3.66466	2.67416	15.0538	0	1.11394	2	9.08	10.42	10.5817	76.1685	76.6972	71.9883	2.64845	2.58654	3.46249	3.11293	2.64958	2.23265	12.8083	15.2083	15.5758	65.6417	64.1	59.7675	5.24608	5.56116	6.45619
1435	low	1	2015-05-28	2015	12	12	4620.15	3.66466	2.67416	15.0538	0	1.11394	2	9.08	10.42	10.5817	76.1685	76.6972	71.9883	2.64845	2.58654	3.46249	3.11293	2.64958	2.23265	12.8083	15.2083	15.5758	65.6417	64.1	59.7675	5.24608	5.56116	6.45619
1436	low	1	2015-05-28	2015	12	12	4620.15	3.66466	2.67416	15.0538	0	1.11394	2	9.08	10.42	10.5817	76.1685	76.6972	71.9883	2.64845	2.58654	3.46249	3.11293	2.64958	2.23265	12.8083	15.2083	15.5758	65.6417	64.1	59.7675	5.24608	5.56116	6.45619
1437	low	1	2015-05-28	2015	12	12	4620.15	3.66466	2.67416	15.0538	1	1.11394	2	9.08	10.42	10.5817	76.1685	76.6972	71.9883	2.64845	2.58654	3.46249	3.11293	2.64958	2.23265	12.8083	15.2083	15.5758	65.6417	64.1	59.7675	5.24608	5.56116	6.45619
1438	low	1	2015-05-28	2015	12	12	4620.15	3.66466	2.67416	15.0538	0	1.11394	2	9.08	10.42	10.5817	76.1685	76.6972	71.9883	2.64845	2.58654	3.46249	3.11293	2.64958	2.23265	12.8083	15.2083	15.5758	65.6417	64.1	59.7675	5.24608	5.56116	6.45619
1439	low	1	2015-05-28	2015	12	12	4620.15	3.66466	2.67416	15.0538	0	1.11394	2	9.08	10.42	10.5817	76.1685	76.6972	71.9883	2.64845	2.58654	3.46249	3.11293	2.64958	2.23265	12.8083	15.2083	15.5758	65.6417	64.1	59.7675	5.24608	5.56116	6.45619
1440	low	1	2015-05-28	2015	12	12	4620.15	3.66466	2.67416	15.0538	0	1.11394	2	9.08	10.42	10.5817	76.1685	76.6972	71.9883	2.64845	2.58654	3.46249	3.11293	2.64958	2.23265	12.8083	15.2083	15.5758	65.6417	64.1	59.7675	5.24608	5.56116	6.45619
1441	low	1	2015-05-28	2015	12	12	4620.15	3.66466	2.67416	15.0538	0	1.11394	2	9.08	10.42	10.5817	76.1685	76.6972	71.9883	2.64845	2.58654	3.46249	3.11293	2.64958	2.23265	12.8083	15.2083	15.5758	65.6417	64.1	59.7675	5.24608	5.56116	6.45619
1442	low	1	2015-05-28	2015	12	12	4620.15	3.66466	2.67416	15.0538	0	1.11394	2	9.08	10.42	10.5817	76.1685	76.6972	71.9883	2.64845	2.58654	3.46249	3.11293	2.64958	2.23265	12.8083	15.2083	15.5758	65.6417	64.1	59.7675	5.24608	5.56116	6.45619
1443	low	1	2015-05-28	2015	12	12	4620.15	3.66466	2.67416	15.0538	0	1.11394	2	9.08	10.42	10.5817	76.1685	76.6972	71.9883	2.64845	2.58654	3.46249	3.11293	2.64958	2.23265	12.8083	15.2083	15.5758	65.6417	64.1	59.7675	5.24608	5.56116	6.45619
1444	low	1	2015-05-28	2015	12	12	4620.15	3.66466	2.67416	15.0538	0	1.11394	2	9.08	10.42	10.5817	76.1685	76.6972	71.9883	2.64845	2.58654	3.46249	3.11293	2.64958	2.23265	12.8083	15.2083	15.5758	65.6417	64.1	59.7675	5.24608	5.56116	6.45619
1445	low	1	2015-05-28	2015	12	12	4620.15	3.66466	2.67416	15.0538	0	1.11394	2	9.08	10.42	10.5817	76.1685	76.6972	71.9883	2.64845	2.58654	3.46249	3.11293	2.64958	2.23265	12.8083	15.2083	15.5758	65.6417	64.1	59.7675	5.24608	5.56116	6.45619
1446	low	1	2015-05-28	2015	12	12	4620.15	3.66466	2.67416	15.0538	0	1.11394	2	9.08	10.42	10.5817	76.1685	76.6972	71.9883	2.64845	2.58654	3.46249	3.11293	2.64958	2.23265	12.8083	15.2083	15.5758	65.6417	64.1	59.7675	5.24608	5.56116	6.45619
1447	low	1	2015-05-28	2015	12	12	4620.15	3.66466	2.67416	15.0538	0	1.11394	2	9.08	10.42	10.5817	76.1685	76.6972	71.9883	2.64845	2.58654	3.46249	3.11293	2.64958	2.23265	12.8083	15.2083	15.5758	65.6417	64.1	59.7675	5.24608	5.56116	6.45619
1448	low	1	2015-05-28	2015	12	12	4620.15	3.66466	2.67416	15.0538	0	1.11394	2	9.08	10.42	10.5817	76.1685	76.6972	71.9883	2.64845	2.58654	3.46249	3.11293	2.64958	2.23265	12.8083	15.2083	15.5758	65.6417	64.1	59.7675	5.24608	5.56116	6.45619
1449	low	1	2015-05-28	2015	12	12	4620.15	3.66466	2.67416	15.0538	0	1.11394	2	9.08	10.42	10.5817	76.1685	76.6972	71.9883	2.64845	2.58654	3.46249	3.11293	2.64958	2.23265	12.8083	15.2083	15.5758	65.6417	64.1	59.7675	5.24608	5.56116	6.45619
1450	low	1	2015-05-28	2015	12	12	4620.15	3.66466	2.67416	15.0538	0	1.11394	2	9.08	10.42	10.5817	76.1685	76.6972	71.9883	2.64845	2.58654	3.46249	3.11293	2.64958	2.23265	12.8083	15.2083	15.5758	65.6417	64.1	59.7675	5.24608	5.56116	6.45619
1451	low	1	2015-05-28	2015	12	12	4620.15	3.66466	2.67416	15.0538	0	1.11394	2	9.08	10.42	10.5817	76.1685	76.6972	71.9883	2.64845	2.58654	3.46249	3.11293	2.64958	2.23265	12.8083	15.2083	15.5758	65.6417	64.1	59.7675	5.24608	5.56116	6.45619
1452	low	1	2015-05-28	2015	12	12	4620.15	3.66466	2.67416	15.0538	0	1.11394	2	9.08	10.42	10.5817	76.1685	76.6972	71.9883	2.64845	2.58654	3.46249	3.11293	2.64958	2.23265	12.8083	15.2083	15.5758	65.6417	64.1	59.7675	5.24608	5.56116	6.45619
1453	low	1	2015-05-28	2015	12	12	4620.15	3.66466	2.67416	15.0538	0	1.11394	2	9.08	10.42	10.5817	76.1685	76.6972	71.9883	2.64845	2.58654	3.46249	3.11293	2.64958	2.23265	12.8083	15.2083	15.5758	65.6417	64.1	59.7675	5.24608	5.56116	6.45619
1454	low	1	2015-06-18	2015	12	12	4620.15	3.66466	2.67416	15.0538	0	1.07918	2	9.08	10.42	10.5817	76.1685	76.6972	71.9883	2.64845	2.58654	3.46249	3.11293	2.64958	2.23265	12.8083	15.2083	15.5758	65.6417	64.1	59.7675	5.24608	5.56116	6.45619
1455	low	1	2015-06-18	2015	12	12	4620.15	3.66466	2.67416	15.0538	0	1.07918	2	9.08	10.42	10.5817	76.1685	76.6972	71.9883	2.64845	2.58654	3.46249	3.11293	2.64958	2.23265	12.8083	15.2083	15.5758	65.6417	64.1	59.7675	5.24608	5.56116	6.45619
1456	low	1	2015-06-18	2015	12	12	4620.15	3.66466	2.67416	15.0538	0	1.07918	2	9.08	10.42	10.5817	76.1685	76.6972	71.9883	2.64845	2.58654	3.46249	3.11293	2.64958	2.23265	12.8083	15.2083	15.5758	65.6417	64.1	59.7675	5.24608	5.56116	6.45619
1457	low	1	2015-06-18	2015	12	12	4620.15	3.66466	2.67416	15.0538	0	1.07918	2	9.08	10.42	10.5817	76.1685	76.6972	71.9883	2.64845	2.58654	3.46249	3.11293	2.64958	2.23265	12.8083	15.2083	15.5758	65.6417	64.1	59.7675	5.24608	5.56116	6.45619
1458	low	1	2015-06-18	2015	12	12	4620.15	3.66466	2.67416	15.0538	0	1.07918	2	9.08	10.42	10.5817	76.1685	76.6972	71.9883	2.64845	2.58654	3.46249	3.11293	2.64958	2.23265	12.8083	15.2083	15.5758	65.6417	64.1	59.7675	5.24608	5.56116	6.45619
1459	low	1	2015-06-18	2015	12	12	4620.15	3.66466	2.67416	15.0538	0	1.07918	2	9.08	10.42	10.5817	76.1685	76.6972	71.9883	2.64845	2.58654	3.46249	3.11293	2.64958	2.23265	12.8083	15.2083	15.5758	65.6417	64.1	59.7675	5.24608	5.56116	6.45619
1460	low	1	2015-06-18	2015	12	12	4620.15	3.66466	2.67416	15.0538	0	1.07918	2	9.08	10.42	10.5817	76.1685	76.6972	71.9883	2.64845	2.58654	3.46249	3.11293	2.64958	2.23265	12.8083	15.2083	15.5758	65.6417	64.1	59.7675	5.24608	5.56116	6.45619
1461	low	1	2015-06-18	2015	12	12	4620.15	3.66466	2.67416	15.0538	1	1.07918	2	9.08	10.42	10.5817	76.1685	76.6972	71.9883	2.64845	2.58654	3.46249	3.11293	2.64958	2.23265	12.8083	15.2083	15.5758	65.6417	64.1	59.7675	5.24608	5.56116	6.45619
1462	low	1	2015-06-18	2015	12	12	4620.15	3.66466	2.67416	15.0538	0	1.07918	2	9.08	10.42	10.5817	76.1685	76.6972	71.9883	2.64845	2.58654	3.46249	3.11293	2.64958	2.23265	12.8083	15.2083	15.5758	65.6417	64.1	59.7675	5.24608	5.56116	6.45619
1463	low	1	2015-06-18	2015	12	12	4620.15	3.66466	2.67416	15.0538	0	1.07918	2	9.08	10.42	10.5817	76.1685	76.6972	71.9883	2.64845	2.58654	3.46249	3.11293	2.64958	2.23265	12.8083	15.2083	15.5758	65.6417	64.1	59.7675	5.24608	5.56116	6.45619
1464	low	1	2015-06-18	2015	12	12	4620.15	3.66466	2.67416	15.0538	0	1.07918	2	9.08	10.42	10.5817	76.1685	76.6972	71.9883	2.64845	2.58654	3.46249	3.11293	2.64958	2.23265	12.8083	15.2083	15.5758	65.6417	64.1	59.7675	5.24608	5.56116	6.45619
1465	low	1	2015-06-18	2015	12	12	4620.15	3.66466	2.67416	15.0538	1	1.07918	2	9.08	10.42	10.5817	76.1685	76.6972	71.9883	2.64845	2.58654	3.46249	3.11293	2.64958	2.23265	12.8083	15.2083	15.5758	65.6417	64.1	59.7675	5.24608	5.56116	6.45619
1466	low	1	2015-06-18	2015	12	12	4620.15	3.66466	2.67416	15.0538	0	1.07918	2	9.08	10.42	10.5817	76.1685	76.6972	71.9883	2.64845	2.58654	3.46249	3.11293	2.64958	2.23265	12.8083	15.2083	15.5758	65.6417	64.1	59.7675	5.24608	5.56116	6.45619
1467	low	1	2015-06-18	2015	12	12	4620.15	3.66466	2.67416	15.0538	0	1.07918	2	9.08	10.42	10.5817	76.1685	76.6972	71.9883	2.64845	2.58654	3.46249	3.11293	2.64958	2.23265	12.8083	15.2083	15.5758	65.6417	64.1	59.7675	5.24608	5.56116	6.45619
1468	low	1	2015-06-18	2015	12	12	4620.15	3.66466	2.67416	15.0538	0	1.07918	2	9.08	10.42	10.5817	76.1685	76.6972	71.9883	2.64845	2.58654	3.46249	3.11293	2.64958	2.23265	12.8083	15.2083	15.5758	65.6417	64.1	59.7675	5.24608	5.56116	6.45619
1469	low	1	2015-06-18	2015	12	12	4620.15	3.66466	2.67416	15.0538	0	1.07918	2	9.08	10.42	10.5817	76.1685	76.6972	71.9883	2.64845	2.58654	3.46249	3.11293	2.64958	2.23265	12.8083	15.2083	15.5758	65.6417	64.1	59.7675	5.24608	5.56116	6.45619
1470	low	1	2015-06-18	2015	12	12	4620.15	3.66466	2.67416	15.0538	0	1.07918	2	9.08	10.42	10.5817	76.1685	76.6972	71.9883	2.64845	2.58654	3.46249	3.11293	2.64958	2.23265	12.8083	15.2083	15.5758	65.6417	64.1	59.7675	5.24608	5.56116	6.45619
1471	low	1	2015-06-18	2015	12	12	4620.15	3.66466	2.67416	15.0538	0	1.07918	2	9.08	10.42	10.5817	76.1685	76.6972	71.9883	2.64845	2.58654	3.46249	3.11293	2.64958	2.23265	12.8083	15.2083	15.5758	65.6417	64.1	59.7675	5.24608	5.56116	6.45619
1472	low	1	2015-06-18	2015	12	12	4620.15	3.66466	2.67416	15.0538	0	1.07918	2	9.08	10.42	10.5817	76.1685	76.6972	71.9883	2.64845	2.58654	3.46249	3.11293	2.64958	2.23265	12.8083	15.2083	15.5758	65.6417	64.1	59.7675	5.24608	5.56116	6.45619
1473	low	1	2015-06-18	2015	12	12	4620.15	3.66466	2.67416	15.0538	0	1.07918	2	9.08	10.42	10.5817	76.1685	76.6972	71.9883	2.64845	2.58654	3.46249	3.11293	2.64958	2.23265	12.8083	15.2083	15.5758	65.6417	64.1	59.7675	5.24608	5.56116	6.45619
1474	low	1	2015-07-24	2015	12	12	4620.15	3.66466	2.67416	15.0538	0	2.5832	2	9.08	10.42	10.5817	76.1685	76.6972	71.9883	2.64845	2.58654	3.46249	3.11293	2.64958	2.23265	12.8083	15.2083	15.5758	65.6417	64.1	59.7675	5.24608	5.56116	6.45619
1475	low	1	2015-07-24	2015	12	12	4620.15	3.66466	2.67416	15.0538	0	2.5832	2	9.08	10.42	10.5817	76.1685	76.6972	71.9883	2.64845	2.58654	3.46249	3.11293	2.64958	2.23265	12.8083	15.2083	15.5758	65.6417	64.1	59.7675	5.24608	5.56116	6.45619
1476	low	1	2015-07-24	2015	12	12	4620.15	3.66466	2.67416	15.0538	1	2.5832	2	9.08	10.42	10.5817	76.1685	76.6972	71.9883	2.64845	2.58654	3.46249	3.11293	2.64958	2.23265	12.8083	15.2083	15.5758	65.6417	64.1	59.7675	5.24608	5.56116	6.45619
1477	low	1	2015-07-24	2015	12	12	4620.15	3.66466	2.67416	15.0538	0	2.5832	2	9.08	10.42	10.5817	76.1685	76.6972	71.9883	2.64845	2.58654	3.46249	3.11293	2.64958	2.23265	12.8083	15.2083	15.5758	65.6417	64.1	59.7675	5.24608	5.56116	6.45619
1478	low	1	2015-07-24	2015	12	12	4620.15	3.66466	2.67416	15.0538	1	2.5832	2	9.08	10.42	10.5817	76.1685	76.6972	71.9883	2.64845	2.58654	3.46249	3.11293	2.64958	2.23265	12.8083	15.2083	15.5758	65.6417	64.1	59.7675	5.24608	5.56116	6.45619
1479	low	1	2015-07-24	2015	12	12	4620.15	3.66466	2.67416	15.0538	0	2.5832	2	9.08	10.42	10.5817	76.1685	76.6972	71.9883	2.64845	2.58654	3.46249	3.11293	2.64958	2.23265	12.8083	15.2083	15.5758	65.6417	64.1	59.7675	5.24608	5.56116	6.45619
1480	low	1	2015-07-24	2015	12	12	4620.15	3.66466	2.67416	15.0538	0	2.5832	2	9.08	10.42	10.5817	76.1685	76.6972	71.9883	2.64845	2.58654	3.46249	3.11293	2.64958	2.23265	12.8083	15.2083	15.5758	65.6417	64.1	59.7675	5.24608	5.56116	6.45619
1481	low	1	2015-07-24	2015	12	12	4620.15	3.66466	2.67416	15.0538	0	2.5832	2	9.08	10.42	10.5817	76.1685	76.6972	71.9883	2.64845	2.58654	3.46249	3.11293	2.64958	2.23265	12.8083	15.2083	15.5758	65.6417	64.1	59.7675	5.24608	5.56116	6.45619
1482	low	1	2015-07-24	2015	12	12	4620.15	3.66466	2.67416	15.0538	0	2.5832	2	9.08	10.42	10.5817	76.1685	76.6972	71.9883	2.64845	2.58654	3.46249	3.11293	2.64958	2.23265	12.8083	15.2083	15.5758	65.6417	64.1	59.7675	5.24608	5.56116	6.45619
1483	low	1	2015-07-24	2015	12	12	4620.15	3.66466	2.67416	15.0538	0	2.5832	2	9.08	10.42	10.5817	76.1685	76.6972	71.9883	2.64845	2.58654	3.46249	3.11293	2.64958	2.23265	12.8083	15.2083	15.5758	65.6417	64.1	59.7675	5.24608	5.56116	6.45619
1484	low	1	2015-07-24	2015	12	12	4620.15	3.66466	2.67416	15.0538	0	2.5832	2	9.08	10.42	10.5817	76.1685	76.6972	71.9883	2.64845	2.58654	3.46249	3.11293	2.64958	2.23265	12.8083	15.2083	15.5758	65.6417	64.1	59.7675	5.24608	5.56116	6.45619
1485	low	1	2015-07-24	2015	12	12	4620.15	3.66466	2.67416	15.0538	0	2.5832	2	9.08	10.42	10.5817	76.1685	76.6972	71.9883	2.64845	2.58654	3.46249	3.11293	2.64958	2.23265	12.8083	15.2083	15.5758	65.6417	64.1	59.7675	5.24608	5.56116	6.45619
1486	low	1	2015-07-24	2015	12	12	4620.15	3.66466	2.67416	15.0538	0	2.5832	2	9.08	10.42	10.5817	76.1685	76.6972	71.9883	2.64845	2.58654	3.46249	3.11293	2.64958	2.23265	12.8083	15.2083	15.5758	65.6417	64.1	59.7675	5.24608	5.56116	6.45619
1487	low	1	2015-07-24	2015	12	12	4620.15	3.66466	2.67416	15.0538	0	2.5832	2	9.08	10.42	10.5817	76.1685	76.6972	71.9883	2.64845	2.58654	3.46249	3.11293	2.64958	2.23265	12.8083	15.2083	15.5758	65.6417	64.1	59.7675	5.24608	5.56116	6.45619
1488	low	1	2015-07-24	2015	12	12	4620.15	3.66466	2.67416	15.0538	0	2.5832	2	9.08	10.42	10.5817	76.1685	76.6972	71.9883	2.64845	2.58654	3.46249	3.11293	2.64958	2.23265	12.8083	15.2083	15.5758	65.6417	64.1	59.7675	5.24608	5.56116	6.45619
1489	low	1	2015-07-24	2015	12	12	4620.15	3.66466	2.67416	15.0538	0	2.5832	2	9.08	10.42	10.5817	76.1685	76.6972	71.9883	2.64845	2.58654	3.46249	3.11293	2.64958	2.23265	12.8083	15.2083	15.5758	65.6417	64.1	59.7675	5.24608	5.56116	6.45619
1490	low	1	2015-07-24	2015	12	12	4620.15	3.66466	2.67416	15.0538	0	2.5832	2	9.08	10.42	10.5817	76.1685	76.6972	71.9883	2.64845	2.58654	3.46249	3.11293	2.64958	2.23265	12.8083	15.2083	15.5758	65.6417	64.1	59.7675	5.24608	5.56116	6.45619
1491	low	1	2015-07-24	2015	12	12	4620.15	3.66466	2.67416	15.0538	0	2.5832	2	9.08	10.42	10.5817	76.1685	76.6972	71.9883	2.64845	2.58654	3.46249	3.11293	2.64958	2.23265	12.8083	15.2083	15.5758	65.6417	64.1	59.7675	5.24608	5.56116	6.45619
1492	low	1	2015-07-24	2015	12	12	4620.15	3.66466	2.67416	15.0538	0	2.5832	2	9.08	10.42	10.5817	76.1685	76.6972	71.9883	2.64845	2.58654	3.46249	3.11293	2.64958	2.23265	12.8083	15.2083	15.5758	65.6417	64.1	59.7675	5.24608	5.56116	6.45619
1493	low	1	2015-07-24	2015	12	12	4620.15	3.66466	2.67416	15.0538	0	2.5832	2	9.08	10.42	10.5817	76.1685	76.6972	71.9883	2.64845	2.58654	3.46249	3.11293	2.64958	2.23265	12.8083	15.2083	15.5758	65.6417	64.1	59.7675	5.24608	5.56116	6.45619
1494	low	1	2015-08-20	2015	12	12	4620.15	3.66466	2.67416	15.0538	0	2.47857	2	9.08	10.42	10.5817	76.1685	76.6972	71.9883	2.64845	2.58654	3.46249	3.11293	2.64958	2.23265	12.8083	15.2083	15.5758	65.6417	64.1	59.7675	5.24608	5.56116	6.45619
1495	low	1	2015-08-20	2015	12	12	4620.15	3.66466	2.67416	15.0538	0	2.47857	2	9.08	10.42	10.5817	76.1685	76.6972	71.9883	2.64845	2.58654	3.46249	3.11293	2.64958	2.23265	12.8083	15.2083	15.5758	65.6417	64.1	59.7675	5.24608	5.56116	6.45619
1496	low	1	2015-08-20	2015	12	12	4620.15	3.66466	2.67416	15.0538	0	2.47857	2	9.08	10.42	10.5817	76.1685	76.6972	71.9883	2.64845	2.58654	3.46249	3.11293	2.64958	2.23265	12.8083	15.2083	15.5758	65.6417	64.1	59.7675	5.24608	5.56116	6.45619
1497	low	1	2015-08-20	2015	12	12	4620.15	3.66466	2.67416	15.0538	0	2.47857	2	9.08	10.42	10.5817	76.1685	76.6972	71.9883	2.64845	2.58654	3.46249	3.11293	2.64958	2.23265	12.8083	15.2083	15.5758	65.6417	64.1	59.7675	5.24608	5.56116	6.45619
1498	low	1	2015-08-20	2015	12	12	4620.15	3.66466	2.67416	15.0538	1	2.47857	2	9.08	10.42	10.5817	76.1685	76.6972	71.9883	2.64845	2.58654	3.46249	3.11293	2.64958	2.23265	12.8083	15.2083	15.5758	65.6417	64.1	59.7675	5.24608	5.56116	6.45619
1499	low	1	2015-08-20	2015	12	12	4620.15	3.66466	2.67416	15.0538	1	2.47857	2	9.08	10.42	10.5817	76.1685	76.6972	71.9883	2.64845	2.58654	3.46249	3.11293	2.64958	2.23265	12.8083	15.2083	15.5758	65.6417	64.1	59.7675	5.24608	5.56116	6.45619
1500	low	1	2015-08-20	2015	12	12	4620.15	3.66466	2.67416	15.0538	0	2.47857	2	9.08	10.42	10.5817	76.1685	76.6972	71.9883	2.64845	2.58654	3.46249	3.11293	2.64958	2.23265	12.8083	15.2083	15.5758	65.6417	64.1	59.7675	5.24608	5.56116	6.45619
1501	low	1	2015-08-20	2015	12	12	4620.15	3.66466	2.67416	15.0538	0	2.47857	2	9.08	10.42	10.5817	76.1685	76.6972	71.9883	2.64845	2.58654	3.46249	3.11293	2.64958	2.23265	12.8083	15.2083	15.5758	65.6417	64.1	59.7675	5.24608	5.56116	6.45619
1502	low	1	2015-08-20	2015	12	12	4620.15	3.66466	2.67416	15.0538	0	2.47857	2	9.08	10.42	10.5817	76.1685	76.6972	71.9883	2.64845	2.58654	3.46249	3.11293	2.64958	2.23265	12.8083	15.2083	15.5758	65.6417	64.1	59.7675	5.24608	5.56116	6.45619
1503	low	1	2015-08-20	2015	12	12	4620.15	3.66466	2.67416	15.0538	0	2.47857	2	9.08	10.42	10.5817	76.1685	76.6972	71.9883	2.64845	2.58654	3.46249	3.11293	2.64958	2.23265	12.8083	15.2083	15.5758	65.6417	64.1	59.7675	5.24608	5.56116	6.45619
1504	low	1	2015-08-20	2015	12	12	4620.15	3.66466	2.67416	15.0538	0	2.47857	2	9.08	10.42	10.5817	76.1685	76.6972	71.9883	2.64845	2.58654	3.46249	3.11293	2.64958	2.23265	12.8083	15.2083	15.5758	65.6417	64.1	59.7675	5.24608	5.56116	6.45619
1505	low	1	2015-08-20	2015	12	12	4620.15	3.66466	2.67416	15.0538	0	2.47857	2	9.08	10.42	10.5817	76.1685	76.6972	71.9883	2.64845	2.58654	3.46249	3.11293	2.64958	2.23265	12.8083	15.2083	15.5758	65.6417	64.1	59.7675	5.24608	5.56116	6.45619
1506	low	1	2015-08-20	2015	12	12	4620.15	3.66466	2.67416	15.0538	0	2.47857	2	9.08	10.42	10.5817	76.1685	76.6972	71.9883	2.64845	2.58654	3.46249	3.11293	2.64958	2.23265	12.8083	15.2083	15.5758	65.6417	64.1	59.7675	5.24608	5.56116	6.45619
1507	low	1	2015-08-20	2015	12	12	4620.15	3.66466	2.67416	15.0538	0	2.47857	2	9.08	10.42	10.5817	76.1685	76.6972	71.9883	2.64845	2.58654	3.46249	3.11293	2.64958	2.23265	12.8083	15.2083	15.5758	65.6417	64.1	59.7675	5.24608	5.56116	6.45619
1508	low	1	2015-08-20	2015	12	12	4620.15	3.66466	2.67416	15.0538	1	2.47857	2	9.08	10.42	10.5817	76.1685	76.6972	71.9883	2.64845	2.58654	3.46249	3.11293	2.64958	2.23265	12.8083	15.2083	15.5758	65.6417	64.1	59.7675	5.24608	5.56116	6.45619
1509	low	1	2015-08-20	2015	12	12	4620.15	3.66466	2.67416	15.0538	0	2.47857	2	9.08	10.42	10.5817	76.1685	76.6972	71.9883	2.64845	2.58654	3.46249	3.11293	2.64958	2.23265	12.8083	15.2083	15.5758	65.6417	64.1	59.7675	5.24608	5.56116	6.45619
1510	low	1	2015-08-20	2015	12	12	4620.15	3.66466	2.67416	15.0538	0	2.47857	2	9.08	10.42	10.5817	76.1685	76.6972	71.9883	2.64845	2.58654	3.46249	3.11293	2.64958	2.23265	12.8083	15.2083	15.5758	65.6417	64.1	59.7675	5.24608	5.56116	6.45619
1511	low	1	2015-08-20	2015	12	12	4620.15	3.66466	2.67416	15.0538	0	2.47857	2	9.08	10.42	10.5817	76.1685	76.6972	71.9883	2.64845	2.58654	3.46249	3.11293	2.64958	2.23265	12.8083	15.2083	15.5758	65.6417	64.1	59.7675	5.24608	5.56116	6.45619
1512	low	1	2015-08-20	2015	12	12	4620.15	3.66466	2.67416	15.0538	0	2.47857	2	9.08	10.42	10.5817	76.1685	76.6972	71.9883	2.64845	2.58654	3.46249	3.11293	2.64958	2.23265	12.8083	15.2083	15.5758	65.6417	64.1	59.7675	5.24608	5.56116	6.45619
1513	low	1	2015-08-20	2015	12	12	4620.15	3.66466	2.67416	15.0538	0	2.47857	2	9.08	10.42	10.5817	76.1685	76.6972	71.9883	2.64845	2.58654	3.46249	3.11293	2.64958	2.23265	12.8083	15.2083	15.5758	65.6417	64.1	59.7675	5.24608	5.56116	6.45619
1514	low	1	2015-09-28	2015	12	12	4620.15	3.66466	2.67416	15.0538	0	2.49969	2	9.08	10.42	10.5817	76.1685	76.6972	71.9883	2.64845	2.58654	3.46249	3.11293	2.64958	2.23265	12.8083	15.2083	15.5758	65.6417	64.1	59.7675	5.24608	5.56116	6.45619
1515	low	1	2015-09-28	2015	12	12	4620.15	3.66466	2.67416	15.0538	0	2.49969	2	9.08	10.42	10.5817	76.1685	76.6972	71.9883	2.64845	2.58654	3.46249	3.11293	2.64958	2.23265	12.8083	15.2083	15.5758	65.6417	64.1	59.7675	5.24608	5.56116	6.45619
1516	low	1	2015-09-28	2015	12	12	4620.15	3.66466	2.67416	15.0538	1	2.49969	2	9.08	10.42	10.5817	76.1685	76.6972	71.9883	2.64845	2.58654	3.46249	3.11293	2.64958	2.23265	12.8083	15.2083	15.5758	65.6417	64.1	59.7675	5.24608	5.56116	6.45619
1517	low	1	2015-09-28	2015	12	12	4620.15	3.66466	2.67416	15.0538	1	2.49969	2	9.08	10.42	10.5817	76.1685	76.6972	71.9883	2.64845	2.58654	3.46249	3.11293	2.64958	2.23265	12.8083	15.2083	15.5758	65.6417	64.1	59.7675	5.24608	5.56116	6.45619
1518	low	1	2015-09-28	2015	12	12	4620.15	3.66466	2.67416	15.0538	0	2.49969	2	9.08	10.42	10.5817	76.1685	76.6972	71.9883	2.64845	2.58654	3.46249	3.11293	2.64958	2.23265	12.8083	15.2083	15.5758	65.6417	64.1	59.7675	5.24608	5.56116	6.45619
1519	low	1	2015-09-28	2015	12	12	4620.15	3.66466	2.67416	15.0538	0	2.49969	2	9.08	10.42	10.5817	76.1685	76.6972	71.9883	2.64845	2.58654	3.46249	3.11293	2.64958	2.23265	12.8083	15.2083	15.5758	65.6417	64.1	59.7675	5.24608	5.56116	6.45619
1520	low	1	2015-09-28	2015	12	12	4620.15	3.66466	2.67416	15.0538	0	2.49969	2	9.08	10.42	10.5817	76.1685	76.6972	71.9883	2.64845	2.58654	3.46249	3.11293	2.64958	2.23265	12.8083	15.2083	15.5758	65.6417	64.1	59.7675	5.24608	5.56116	6.45619
1521	low	1	2015-09-28	2015	12	12	4620.15	3.66466	2.67416	15.0538	0	2.49969	2	9.08	10.42	10.5817	76.1685	76.6972	71.9883	2.64845	2.58654	3.46249	3.11293	2.64958	2.23265	12.8083	15.2083	15.5758	65.6417	64.1	59.7675	5.24608	5.56116	6.45619
1522	low	1	2015-09-28	2015	12	12	4620.15	3.66466	2.67416	15.0538	0	2.49969	2	9.08	10.42	10.5817	76.1685	76.6972	71.9883	2.64845	2.58654	3.46249	3.11293	2.64958	2.23265	12.8083	15.2083	15.5758	65.6417	64.1	59.7675	5.24608	5.56116	6.45619
1523	low	1	2015-09-28	2015	12	12	4620.15	3.66466	2.67416	15.0538	0	2.49969	2	9.08	10.42	10.5817	76.1685	76.6972	71.9883	2.64845	2.58654	3.46249	3.11293	2.64958	2.23265	12.8083	15.2083	15.5758	65.6417	64.1	59.7675	5.24608	5.56116	6.45619
1524	low	1	2015-09-28	2015	12	12	4620.15	3.66466	2.67416	15.0538	0	2.49969	2	9.08	10.42	10.5817	76.1685	76.6972	71.9883	2.64845	2.58654	3.46249	3.11293	2.64958	2.23265	12.8083	15.2083	15.5758	65.6417	64.1	59.7675	5.24608	5.56116	6.45619
1525	low	1	2015-09-28	2015	12	12	4620.15	3.66466	2.67416	15.0538	0	2.49969	2	9.08	10.42	10.5817	76.1685	76.6972	71.9883	2.64845	2.58654	3.46249	3.11293	2.64958	2.23265	12.8083	15.2083	15.5758	65.6417	64.1	59.7675	5.24608	5.56116	6.45619
1526	low	1	2015-09-28	2015	12	12	4620.15	3.66466	2.67416	15.0538	0	2.49969	2	9.08	10.42	10.5817	76.1685	76.6972	71.9883	2.64845	2.58654	3.46249	3.11293	2.64958	2.23265	12.8083	15.2083	15.5758	65.6417	64.1	59.7675	5.24608	5.56116	6.45619
1527	low	1	2015-09-28	2015	12	12	4620.15	3.66466	2.67416	15.0538	1	2.49969	2	9.08	10.42	10.5817	76.1685	76.6972	71.9883	2.64845	2.58654	3.46249	3.11293	2.64958	2.23265	12.8083	15.2083	15.5758	65.6417	64.1	59.7675	5.24608	5.56116	6.45619
1528	low	1	2015-09-28	2015	12	12	4620.15	3.66466	2.67416	15.0538	0	2.49969	2	9.08	10.42	10.5817	76.1685	76.6972	71.9883	2.64845	2.58654	3.46249	3.11293	2.64958	2.23265	12.8083	15.2083	15.5758	65.6417	64.1	59.7675	5.24608	5.56116	6.45619
1529	low	1	2015-09-28	2015	12	12	4620.15	3.66466	2.67416	15.0538	1	2.49969	2	9.08	10.42	10.5817	76.1685	76.6972	71.9883	2.64845	2.58654	3.46249	3.11293	2.64958	2.23265	12.8083	15.2083	15.5758	65.6417	64.1	59.7675	5.24608	5.56116	6.45619
1530	low	1	2015-09-28	2015	12	12	4620.15	3.66466	2.67416	15.0538	0	2.49969	2	9.08	10.42	10.5817	76.1685	76.6972	71.9883	2.64845	2.58654	3.46249	3.11293	2.64958	2.23265	12.8083	15.2083	15.5758	65.6417	64.1	59.7675	5.24608	5.56116	6.45619
1531	low	1	2015-09-28	2015	12	12	4620.15	3.66466	2.67416	15.0538	1	2.49969	2	9.08	10.42	10.5817	76.1685	76.6972	71.9883	2.64845	2.58654	3.46249	3.11293	2.64958	2.23265	12.8083	15.2083	15.5758	65.6417	64.1	59.7675	5.24608	5.56116	6.45619
1532	low	1	2015-09-28	2015	12	12	4620.15	3.66466	2.67416	15.0538	0	2.49969	2	9.08	10.42	10.5817	76.1685	76.6972	71.9883	2.64845	2.58654	3.46249	3.11293	2.64958	2.23265	12.8083	15.2083	15.5758	65.6417	64.1	59.7675	5.24608	5.56116	6.45619
1533	low	1	2015-09-28	2015	12	12	4620.15	3.66466	2.67416	15.0538	0	2.49969	2	9.08	10.42	10.5817	76.1685	76.6972	71.9883	2.64845	2.58654	3.46249	3.11293	2.64958	2.23265	12.8083	15.2083	15.5758	65.6417	64.1	59.7675	5.24608	5.56116	6.45619
1534	low	1	2015-10-21	2015	12	12	4620.15	3.66466	2.67416	15.0538	0	2.44871	2	9.08	10.42	10.5817	76.1685	76.6972	71.9883	2.64845	2.58654	3.46249	3.11293	2.64958	2.23265	12.8083	15.2083	15.5758	65.6417	64.1	59.7675	5.24608	5.56116	6.45619
1535	low	1	2015-10-21	2015	12	12	4620.15	3.66466	2.67416	15.0538	0	2.44871	2	9.08	10.42	10.5817	76.1685	76.6972	71.9883	2.64845	2.58654	3.46249	3.11293	2.64958	2.23265	12.8083	15.2083	15.5758	65.6417	64.1	59.7675	5.24608	5.56116	6.45619
1536	low	1	2015-10-21	2015	12	12	4620.15	3.66466	2.67416	15.0538	0	2.44871	2	9.08	10.42	10.5817	76.1685	76.6972	71.9883	2.64845	2.58654	3.46249	3.11293	2.64958	2.23265	12.8083	15.2083	15.5758	65.6417	64.1	59.7675	5.24608	5.56116	6.45619
1537	low	1	2015-10-21	2015	12	12	4620.15	3.66466	2.67416	15.0538	0	2.44871	2	9.08	10.42	10.5817	76.1685	76.6972	71.9883	2.64845	2.58654	3.46249	3.11293	2.64958	2.23265	12.8083	15.2083	15.5758	65.6417	64.1	59.7675	5.24608	5.56116	6.45619
1538	low	1	2015-10-21	2015	12	12	4620.15	3.66466	2.67416	15.0538	0	2.44871	2	9.08	10.42	10.5817	76.1685	76.6972	71.9883	2.64845	2.58654	3.46249	3.11293	2.64958	2.23265	12.8083	15.2083	15.5758	65.6417	64.1	59.7675	5.24608	5.56116	6.45619
1539	low	1	2015-10-21	2015	12	12	4620.15	3.66466	2.67416	15.0538	0	2.44871	2	9.08	10.42	10.5817	76.1685	76.6972	71.9883	2.64845	2.58654	3.46249	3.11293	2.64958	2.23265	12.8083	15.2083	15.5758	65.6417	64.1	59.7675	5.24608	5.56116	6.45619
1540	low	1	2015-10-21	2015	12	12	4620.15	3.66466	2.67416	15.0538	0	2.44871	2	9.08	10.42	10.5817	76.1685	76.6972	71.9883	2.64845	2.58654	3.46249	3.11293	2.64958	2.23265	12.8083	15.2083	15.5758	65.6417	64.1	59.7675	5.24608	5.56116	6.45619
1541	low	1	2015-10-21	2015	12	12	4620.15	3.66466	2.67416	15.0538	0	2.44871	2	9.08	10.42	10.5817	76.1685	76.6972	71.9883	2.64845	2.58654	3.46249	3.11293	2.64958	2.23265	12.8083	15.2083	15.5758	65.6417	64.1	59.7675	5.24608	5.56116	6.45619
1542	low	1	2015-10-21	2015	12	12	4620.15	3.66466	2.67416	15.0538	0	2.44871	2	9.08	10.42	10.5817	76.1685	76.6972	71.9883	2.64845	2.58654	3.46249	3.11293	2.64958	2.23265	12.8083	15.2083	15.5758	65.6417	64.1	59.7675	5.24608	5.56116	6.45619
1543	low	1	2015-10-21	2015	12	12	4620.15	3.66466	2.67416	15.0538	0	2.44871	2	9.08	10.42	10.5817	76.1685	76.6972	71.9883	2.64845	2.58654	3.46249	3.11293	2.64958	2.23265	12.8083	15.2083	15.5758	65.6417	64.1	59.7675	5.24608	5.56116	6.45619
1544	low	1	2015-10-21	2015	12	12	4620.15	3.66466	2.67416	15.0538	0	2.44871	2	9.08	10.42	10.5817	76.1685	76.6972	71.9883	2.64845	2.58654	3.46249	3.11293	2.64958	2.23265	12.8083	15.2083	15.5758	65.6417	64.1	59.7675	5.24608	5.56116	6.45619
1545	low	1	2015-10-21	2015	12	12	4620.15	3.66466	2.67416	15.0538	0	2.44871	2	9.08	10.42	10.5817	76.1685	76.6972	71.9883	2.64845	2.58654	3.46249	3.11293	2.64958	2.23265	12.8083	15.2083	15.5758	65.6417	64.1	59.7675	5.24608	5.56116	6.45619
1546	low	1	2015-10-21	2015	12	12	4620.15	3.66466	2.67416	15.0538	0	2.44871	2	9.08	10.42	10.5817	76.1685	76.6972	71.9883	2.64845	2.58654	3.46249	3.11293	2.64958	2.23265	12.8083	15.2083	15.5758	65.6417	64.1	59.7675	5.24608	5.56116	6.45619
1547	low	1	2015-10-21	2015	12	12	4620.15	3.66466	2.67416	15.0538	0	2.44871	2	9.08	10.42	10.5817	76.1685	76.6972	71.9883	2.64845	2.58654	3.46249	3.11293	2.64958	2.23265	12.8083	15.2083	15.5758	65.6417	64.1	59.7675	5.24608	5.56116	6.45619
1548	low	1	2015-10-21	2015	12	12	4620.15	3.66466	2.67416	15.0538	1	2.44871	2	9.08	10.42	10.5817	76.1685	76.6972	71.9883	2.64845	2.58654	3.46249	3.11293	2.64958	2.23265	12.8083	15.2083	15.5758	65.6417	64.1	59.7675	5.24608	5.56116	6.45619
1549	low	1	2015-10-21	2015	12	12	4620.15	3.66466	2.67416	15.0538	0	2.44871	2	9.08	10.42	10.5817	76.1685	76.6972	71.9883	2.64845	2.58654	3.46249	3.11293	2.64958	2.23265	12.8083	15.2083	15.5758	65.6417	64.1	59.7675	5.24608	5.56116	6.45619
1550	low	1	2015-10-21	2015	12	12	4620.15	3.66466	2.67416	15.0538	0	2.44871	2	9.08	10.42	10.5817	76.1685	76.6972	71.9883	2.64845	2.58654	3.46249	3.11293	2.64958	2.23265	12.8083	15.2083	15.5758	65.6417	64.1	59.7675	5.24608	5.56116	6.45619
1551	low	1	2015-10-21	2015	12	12	4620.15	3.66466	2.67416	15.0538	1	2.44871	2	9.08	10.42	10.5817	76.1685	76.6972	71.9883	2.64845	2.58654	3.46249	3.11293	2.64958	2.23265	12.8083	15.2083	15.5758	65.6417	64.1	59.7675	5.24608	5.56116	6.45619
1552	low	1	2015-10-21	2015	12	12	4620.15	3.66466	2.67416	15.0538	0	2.44871	2	9.08	10.42	10.5817	76.1685	76.6972	71.9883	2.64845	2.58654	3.46249	3.11293	2.64958	2.23265	12.8083	15.2083	15.5758	65.6417	64.1	59.7675	5.24608	5.56116	6.45619
1553	low	1	2015-10-21	2015	12	12	4620.15	3.66466	2.67416	15.0538	0	2.44871	2	9.08	10.42	10.5817	76.1685	76.6972	71.9883	2.64845	2.58654	3.46249	3.11293	2.64958	2.23265	12.8083	15.2083	15.5758	65.6417	64.1	59.7675	5.24608	5.56116	6.45619
1554	low	1	2015-11-18	2015	12	12	4620.15	3.66466	2.67416	15.0538	0	2.41664	2	9.08	10.42	10.5817	76.1685	76.6972	71.9883	2.64845	2.58654	3.46249	3.11293	2.64958	2.23265	12.8083	15.2083	15.5758	65.6417	64.1	59.7675	5.24608	5.56116	6.45619
1555	low	1	2015-11-18	2015	12	12	4620.15	3.66466	2.67416	15.0538	1	2.41664	2	9.08	10.42	10.5817	76.1685	76.6972	71.9883	2.64845	2.58654	3.46249	3.11293	2.64958	2.23265	12.8083	15.2083	15.5758	65.6417	64.1	59.7675	5.24608	5.56116	6.45619
1556	low	1	2015-11-18	2015	12	12	4620.15	3.66466	2.67416	15.0538	0	2.41664	2	9.08	10.42	10.5817	76.1685	76.6972	71.9883	2.64845	2.58654	3.46249	3.11293	2.64958	2.23265	12.8083	15.2083	15.5758	65.6417	64.1	59.7675	5.24608	5.56116	6.45619
1557	low	1	2015-11-18	2015	12	12	4620.15	3.66466	2.67416	15.0538	0	2.41664	2	9.08	10.42	10.5817	76.1685	76.6972	71.9883	2.64845	2.58654	3.46249	3.11293	2.64958	2.23265	12.8083	15.2083	15.5758	65.6417	64.1	59.7675	5.24608	5.56116	6.45619
1558	low	1	2015-11-18	2015	12	12	4620.15	3.66466	2.67416	15.0538	0	2.41664	2	9.08	10.42	10.5817	76.1685	76.6972	71.9883	2.64845	2.58654	3.46249	3.11293	2.64958	2.23265	12.8083	15.2083	15.5758	65.6417	64.1	59.7675	5.24608	5.56116	6.45619
1559	low	1	2015-11-18	2015	12	12	4620.15	3.66466	2.67416	15.0538	0	2.41664	2	9.08	10.42	10.5817	76.1685	76.6972	71.9883	2.64845	2.58654	3.46249	3.11293	2.64958	2.23265	12.8083	15.2083	15.5758	65.6417	64.1	59.7675	5.24608	5.56116	6.45619
1560	low	1	2015-11-18	2015	12	12	4620.15	3.66466	2.67416	15.0538	0	2.41664	2	9.08	10.42	10.5817	76.1685	76.6972	71.9883	2.64845	2.58654	3.46249	3.11293	2.64958	2.23265	12.8083	15.2083	15.5758	65.6417	64.1	59.7675	5.24608	5.56116	6.45619
1561	low	1	2015-11-18	2015	12	12	4620.15	3.66466	2.67416	15.0538	1	2.41664	2	9.08	10.42	10.5817	76.1685	76.6972	71.9883	2.64845	2.58654	3.46249	3.11293	2.64958	2.23265	12.8083	15.2083	15.5758	65.6417	64.1	59.7675	5.24608	5.56116	6.45619
1562	low	1	2015-11-18	2015	12	12	4620.15	3.66466	2.67416	15.0538	1	2.41664	2	9.08	10.42	10.5817	76.1685	76.6972	71.9883	2.64845	2.58654	3.46249	3.11293	2.64958	2.23265	12.8083	15.2083	15.5758	65.6417	64.1	59.7675	5.24608	5.56116	6.45619
1563	low	1	2015-11-18	2015	12	12	4620.15	3.66466	2.67416	15.0538	1	2.41664	2	9.08	10.42	10.5817	76.1685	76.6972	71.9883	2.64845	2.58654	3.46249	3.11293	2.64958	2.23265	12.8083	15.2083	15.5758	65.6417	64.1	59.7675	5.24608	5.56116	6.45619
1564	low	1	2015-11-18	2015	12	12	4620.15	3.66466	2.67416	15.0538	0	2.41664	2	9.08	10.42	10.5817	76.1685	76.6972	71.9883	2.64845	2.58654	3.46249	3.11293	2.64958	2.23265	12.8083	15.2083	15.5758	65.6417	64.1	59.7675	5.24608	5.56116	6.45619
1565	low	1	2015-11-18	2015	12	12	4620.15	3.66466	2.67416	15.0538	0	2.41664	2	9.08	10.42	10.5817	76.1685	76.6972	71.9883	2.64845	2.58654	3.46249	3.11293	2.64958	2.23265	12.8083	15.2083	15.5758	65.6417	64.1	59.7675	5.24608	5.56116	6.45619
1566	low	1	2015-11-18	2015	12	12	4620.15	3.66466	2.67416	15.0538	0	2.41664	2	9.08	10.42	10.5817	76.1685	76.6972	71.9883	2.64845	2.58654	3.46249	3.11293	2.64958	2.23265	12.8083	15.2083	15.5758	65.6417	64.1	59.7675	5.24608	5.56116	6.45619
1567	low	1	2015-11-18	2015	12	12	4620.15	3.66466	2.67416	15.0538	0	2.41664	2	9.08	10.42	10.5817	76.1685	76.6972	71.9883	2.64845	2.58654	3.46249	3.11293	2.64958	2.23265	12.8083	15.2083	15.5758	65.6417	64.1	59.7675	5.24608	5.56116	6.45619
1568	low	1	2015-11-18	2015	12	12	4620.15	3.66466	2.67416	15.0538	0	2.41664	2	9.08	10.42	10.5817	76.1685	76.6972	71.9883	2.64845	2.58654	3.46249	3.11293	2.64958	2.23265	12.8083	15.2083	15.5758	65.6417	64.1	59.7675	5.24608	5.56116	6.45619
1569	low	1	2015-11-18	2015	12	12	4620.15	3.66466	2.67416	15.0538	0	2.41664	2	9.08	10.42	10.5817	76.1685	76.6972	71.9883	2.64845	2.58654	3.46249	3.11293	2.64958	2.23265	12.8083	15.2083	15.5758	65.6417	64.1	59.7675	5.24608	5.56116	6.45619
1570	low	1	2015-11-18	2015	12	12	4620.15	3.66466	2.67416	15.0538	1	2.41664	2	9.08	10.42	10.5817	76.1685	76.6972	71.9883	2.64845	2.58654	3.46249	3.11293	2.64958	2.23265	12.8083	15.2083	15.5758	65.6417	64.1	59.7675	5.24608	5.56116	6.45619
1571	low	1	2015-11-18	2015	12	12	4620.15	3.66466	2.67416	15.0538	1	2.41664	2	9.08	10.42	10.5817	76.1685	76.6972	71.9883	2.64845	2.58654	3.46249	3.11293	2.64958	2.23265	12.8083	15.2083	15.5758	65.6417	64.1	59.7675	5.24608	5.56116	6.45619
1572	low	1	2015-11-18	2015	12	12	4620.15	3.66466	2.67416	15.0538	0	2.41664	2	9.08	10.42	10.5817	76.1685	76.6972	71.9883	2.64845	2.58654	3.46249	3.11293	2.64958	2.23265	12.8083	15.2083	15.5758	65.6417	64.1	59.7675	5.24608	5.56116	6.45619
1573	low	1	2015-11-18	2015	12	12	4620.15	3.66466	2.67416	15.0538	0	2.41664	2	9.08	10.42	10.5817	76.1685	76.6972	71.9883	2.64845	2.58654	3.46249	3.11293	2.64958	2.23265	12.8083	15.2083	15.5758	65.6417	64.1	59.7675	5.24608	5.56116	6.45619
1574	low	1	2015-12-14	2015	12	12	4620.15	3.66466	2.67416	15.0538	0	2.37107	2	9.08	10.42	10.5817	76.1685	76.6972	71.9883	2.64845	2.58654	3.46249	3.11293	2.64958	2.23265	12.8083	15.2083	15.5758	65.6417	64.1	59.7675	5.24608	5.56116	6.45619
1575	low	1	2015-12-14	2015	12	12	4620.15	3.66466	2.67416	15.0538	1	2.37107	2	9.08	10.42	10.5817	76.1685	76.6972	71.9883	2.64845	2.58654	3.46249	3.11293	2.64958	2.23265	12.8083	15.2083	15.5758	65.6417	64.1	59.7675	5.24608	5.56116	6.45619
1576	low	1	2015-12-14	2015	12	12	4620.15	3.66466	2.67416	15.0538	0	2.37107	2	9.08	10.42	10.5817	76.1685	76.6972	71.9883	2.64845	2.58654	3.46249	3.11293	2.64958	2.23265	12.8083	15.2083	15.5758	65.6417	64.1	59.7675	5.24608	5.56116	6.45619
1577	low	1	2015-12-14	2015	12	12	4620.15	3.66466	2.67416	15.0538	0	2.37107	2	9.08	10.42	10.5817	76.1685	76.6972	71.9883	2.64845	2.58654	3.46249	3.11293	2.64958	2.23265	12.8083	15.2083	15.5758	65.6417	64.1	59.7675	5.24608	5.56116	6.45619
1578	low	1	2015-12-14	2015	12	12	4620.15	3.66466	2.67416	15.0538	0	2.37107	2	9.08	10.42	10.5817	76.1685	76.6972	71.9883	2.64845	2.58654	3.46249	3.11293	2.64958	2.23265	12.8083	15.2083	15.5758	65.6417	64.1	59.7675	5.24608	5.56116	6.45619
1579	low	1	2015-12-14	2015	12	12	4620.15	3.66466	2.67416	15.0538	1	2.37107	2	9.08	10.42	10.5817	76.1685	76.6972	71.9883	2.64845	2.58654	3.46249	3.11293	2.64958	2.23265	12.8083	15.2083	15.5758	65.6417	64.1	59.7675	5.24608	5.56116	6.45619
1580	low	1	2016-02-22	2016	13	13	6290.37	3.79868	3.66466	11.6667	0	2.26717	4	10.42	10.5817	9.88191	76.6972	71.9883	75.8645	2.58654	3.46249	2.76642	2.64958	2.23265	3.02914	15.2083	15.5758	14.4067	64.1	59.7675	66.4417	5.56116	6.45619	4.76034
1581	low	1	2016-02-22	2016	13	13	6290.37	3.79868	3.66466	11.6667	1	2.26717	4	10.42	10.5817	9.88191	76.6972	71.9883	75.8645	2.58654	3.46249	2.76642	2.64958	2.23265	3.02914	15.2083	15.5758	14.4067	64.1	59.7675	66.4417	5.56116	6.45619	4.76034
1582	low	1	2016-02-22	2016	13	13	6290.37	3.79868	3.66466	11.6667	0	2.26717	4	10.42	10.5817	9.88191	76.6972	71.9883	75.8645	2.58654	3.46249	2.76642	2.64958	2.23265	3.02914	15.2083	15.5758	14.4067	64.1	59.7675	66.4417	5.56116	6.45619	4.76034
1583	low	1	2016-02-22	2016	13	13	6290.37	3.79868	3.66466	11.6667	0	2.26717	4	10.42	10.5817	9.88191	76.6972	71.9883	75.8645	2.58654	3.46249	2.76642	2.64958	2.23265	3.02914	15.2083	15.5758	14.4067	64.1	59.7675	66.4417	5.56116	6.45619	4.76034
1584	low	1	2016-02-22	2016	13	13	6290.37	3.79868	3.66466	11.6667	0	2.26717	4	10.42	10.5817	9.88191	76.6972	71.9883	75.8645	2.58654	3.46249	2.76642	2.64958	2.23265	3.02914	15.2083	15.5758	14.4067	64.1	59.7675	66.4417	5.56116	6.45619	4.76034
1585	low	1	2016-02-22	2016	13	13	6290.37	3.79868	3.66466	11.6667	0	2.26717	4	10.42	10.5817	9.88191	76.6972	71.9883	75.8645	2.58654	3.46249	2.76642	2.64958	2.23265	3.02914	15.2083	15.5758	14.4067	64.1	59.7675	66.4417	5.56116	6.45619	4.76034
1586	low	1	2016-02-22	2016	13	13	6290.37	3.79868	3.66466	11.6667	0	2.26717	4	10.42	10.5817	9.88191	76.6972	71.9883	75.8645	2.58654	3.46249	2.76642	2.64958	2.23265	3.02914	15.2083	15.5758	14.4067	64.1	59.7675	66.4417	5.56116	6.45619	4.76034
1587	low	1	2016-02-22	2016	13	13	6290.37	3.79868	3.66466	11.6667	0	2.26717	4	10.42	10.5817	9.88191	76.6972	71.9883	75.8645	2.58654	3.46249	2.76642	2.64958	2.23265	3.02914	15.2083	15.5758	14.4067	64.1	59.7675	66.4417	5.56116	6.45619	4.76034
1588	low	1	2016-02-22	2016	13	13	6290.37	3.79868	3.66466	11.6667	0	2.26717	4	10.42	10.5817	9.88191	76.6972	71.9883	75.8645	2.58654	3.46249	2.76642	2.64958	2.23265	3.02914	15.2083	15.5758	14.4067	64.1	59.7675	66.4417	5.56116	6.45619	4.76034
1589	low	1	2016-02-22	2016	13	13	6290.37	3.79868	3.66466	11.6667	0	2.26717	4	10.42	10.5817	9.88191	76.6972	71.9883	75.8645	2.58654	3.46249	2.76642	2.64958	2.23265	3.02914	15.2083	15.5758	14.4067	64.1	59.7675	66.4417	5.56116	6.45619	4.76034
1590	low	1	2016-02-22	2016	13	13	6290.37	3.79868	3.66466	11.6667	0	2.26717	4	10.42	10.5817	9.88191	76.6972	71.9883	75.8645	2.58654	3.46249	2.76642	2.64958	2.23265	3.02914	15.2083	15.5758	14.4067	64.1	59.7675	66.4417	5.56116	6.45619	4.76034
1591	low	1	2016-02-22	2016	13	13	6290.37	3.79868	3.66466	11.6667	0	2.26717	4	10.42	10.5817	9.88191	76.6972	71.9883	75.8645	2.58654	3.46249	2.76642	2.64958	2.23265	3.02914	15.2083	15.5758	14.4067	64.1	59.7675	66.4417	5.56116	6.45619	4.76034
1592	low	1	2016-02-22	2016	13	13	6290.37	3.79868	3.66466	11.6667	0	2.26717	4	10.42	10.5817	9.88191	76.6972	71.9883	75.8645	2.58654	3.46249	2.76642	2.64958	2.23265	3.02914	15.2083	15.5758	14.4067	64.1	59.7675	66.4417	5.56116	6.45619	4.76034
1593	low	1	2016-02-22	2016	13	13	6290.37	3.79868	3.66466	11.6667	0	2.26717	4	10.42	10.5817	9.88191	76.6972	71.9883	75.8645	2.58654	3.46249	2.76642	2.64958	2.23265	3.02914	15.2083	15.5758	14.4067	64.1	59.7675	66.4417	5.56116	6.45619	4.76034
1594	low	1	2016-02-22	2016	13	13	6290.37	3.79868	3.66466	11.6667	0	2.26717	4	10.42	10.5817	9.88191	76.6972	71.9883	75.8645	2.58654	3.46249	2.76642	2.64958	2.23265	3.02914	15.2083	15.5758	14.4067	64.1	59.7675	66.4417	5.56116	6.45619	4.76034
1595	low	1	2016-02-22	2016	13	13	6290.37	3.79868	3.66466	11.6667	0	2.26717	4	10.42	10.5817	9.88191	76.6972	71.9883	75.8645	2.58654	3.46249	2.76642	2.64958	2.23265	3.02914	15.2083	15.5758	14.4067	64.1	59.7675	66.4417	5.56116	6.45619	4.76034
1596	low	1	2016-02-22	2016	13	13	6290.37	3.79868	3.66466	11.6667	0	2.26717	4	10.42	10.5817	9.88191	76.6972	71.9883	75.8645	2.58654	3.46249	2.76642	2.64958	2.23265	3.02914	15.2083	15.5758	14.4067	64.1	59.7675	66.4417	5.56116	6.45619	4.76034
1597	low	1	2016-02-22	2016	13	13	6290.37	3.79868	3.66466	11.6667	0	2.26717	4	10.42	10.5817	9.88191	76.6972	71.9883	75.8645	2.58654	3.46249	2.76642	2.64958	2.23265	3.02914	15.2083	15.5758	14.4067	64.1	59.7675	66.4417	5.56116	6.45619	4.76034
1598	low	1	2016-02-22	2016	13	13	6290.37	3.79868	3.66466	11.6667	0	2.26717	4	10.42	10.5817	9.88191	76.6972	71.9883	75.8645	2.58654	3.46249	2.76642	2.64958	2.23265	3.02914	15.2083	15.5758	14.4067	64.1	59.7675	66.4417	5.56116	6.45619	4.76034
1599	low	1	2016-02-22	2016	13	13	6290.37	3.79868	3.66466	11.6667	0	2.26717	4	10.42	10.5817	9.88191	76.6972	71.9883	75.8645	2.58654	3.46249	2.76642	2.64958	2.23265	3.02914	15.2083	15.5758	14.4067	64.1	59.7675	66.4417	5.56116	6.45619	4.76034
1600	low	1	2016-03-29	2016	13	13	6290.37	3.79868	3.66466	11.6667	0	2.26717	4	10.42	10.5817	9.88191	76.6972	71.9883	75.8645	2.58654	3.46249	2.76642	2.64958	2.23265	3.02914	15.2083	15.5758	14.4067	64.1	59.7675	66.4417	5.56116	6.45619	4.76034
1601	low	1	2016-03-29	2016	13	13	6290.37	3.79868	3.66466	11.6667	0	2.26717	4	10.42	10.5817	9.88191	76.6972	71.9883	75.8645	2.58654	3.46249	2.76642	2.64958	2.23265	3.02914	15.2083	15.5758	14.4067	64.1	59.7675	66.4417	5.56116	6.45619	4.76034
1602	low	1	2016-03-29	2016	13	13	6290.37	3.79868	3.66466	11.6667	1	2.96142	4	10.42	10.5817	9.88191	76.6972	71.9883	75.8645	2.58654	3.46249	2.76642	2.64958	2.23265	3.02914	15.2083	15.5758	14.4067	64.1	59.7675	66.4417	5.56116	6.45619	4.76034
1603	low	1	2016-03-29	2016	13	13	6290.37	3.79868	3.66466	11.6667	0	2.26717	4	10.42	10.5817	9.88191	76.6972	71.9883	75.8645	2.58654	3.46249	2.76642	2.64958	2.23265	3.02914	15.2083	15.5758	14.4067	64.1	59.7675	66.4417	5.56116	6.45619	4.76034
1604	low	1	2016-03-29	2016	13	13	6290.37	3.79868	3.66466	11.6667	0	2.26717	4	10.42	10.5817	9.88191	76.6972	71.9883	75.8645	2.58654	3.46249	2.76642	2.64958	2.23265	3.02914	15.2083	15.5758	14.4067	64.1	59.7675	66.4417	5.56116	6.45619	4.76034
1605	low	1	2016-03-29	2016	13	13	6290.37	3.79868	3.66466	11.6667	1	2.26717	4	10.42	10.5817	9.88191	76.6972	71.9883	75.8645	2.58654	3.46249	2.76642	2.64958	2.23265	3.02914	15.2083	15.5758	14.4067	64.1	59.7675	66.4417	5.56116	6.45619	4.76034
1606	low	1	2016-03-29	2016	13	13	6290.37	3.79868	3.66466	11.6667	0	2.26717	4	10.42	10.5817	9.88191	76.6972	71.9883	75.8645	2.58654	3.46249	2.76642	2.64958	2.23265	3.02914	15.2083	15.5758	14.4067	64.1	59.7675	66.4417	5.56116	6.45619	4.76034
1607	low	1	2016-03-29	2016	13	13	6290.37	3.79868	3.66466	11.6667	0	2.26717	4	10.42	10.5817	9.88191	76.6972	71.9883	75.8645	2.58654	3.46249	2.76642	2.64958	2.23265	3.02914	15.2083	15.5758	14.4067	64.1	59.7675	66.4417	5.56116	6.45619	4.76034
1608	low	1	2016-03-29	2016	13	13	6290.37	3.79868	3.66466	11.6667	0	2.26717	4	10.42	10.5817	9.88191	76.6972	71.9883	75.8645	2.58654	3.46249	2.76642	2.64958	2.23265	3.02914	15.2083	15.5758	14.4067	64.1	59.7675	66.4417	5.56116	6.45619	4.76034
1609	low	1	2016-03-29	2016	13	13	6290.37	3.79868	3.66466	11.6667	0	2.26717	4	10.42	10.5817	9.88191	76.6972	71.9883	75.8645	2.58654	3.46249	2.76642	2.64958	2.23265	3.02914	15.2083	15.5758	14.4067	64.1	59.7675	66.4417	5.56116	6.45619	4.76034
1610	low	1	2016-03-29	2016	13	13	6290.37	3.79868	3.66466	11.6667	0	2.26717	4	10.42	10.5817	9.88191	76.6972	71.9883	75.8645	2.58654	3.46249	2.76642	2.64958	2.23265	3.02914	15.2083	15.5758	14.4067	64.1	59.7675	66.4417	5.56116	6.45619	4.76034
1611	low	1	2016-03-29	2016	13	13	6290.37	3.79868	3.66466	11.6667	0	2.26717	4	10.42	10.5817	9.88191	76.6972	71.9883	75.8645	2.58654	3.46249	2.76642	2.64958	2.23265	3.02914	15.2083	15.5758	14.4067	64.1	59.7675	66.4417	5.56116	6.45619	4.76034
1612	low	1	2016-03-29	2016	13	13	6290.37	3.79868	3.66466	11.6667	0	2.26717	4	10.42	10.5817	9.88191	76.6972	71.9883	75.8645	2.58654	3.46249	2.76642	2.64958	2.23265	3.02914	15.2083	15.5758	14.4067	64.1	59.7675	66.4417	5.56116	6.45619	4.76034
1613	low	1	2016-03-29	2016	13	13	6290.37	3.79868	3.66466	11.6667	0	2.26717	4	10.42	10.5817	9.88191	76.6972	71.9883	75.8645	2.58654	3.46249	2.76642	2.64958	2.23265	3.02914	15.2083	15.5758	14.4067	64.1	59.7675	66.4417	5.56116	6.45619	4.76034
1614	low	1	2016-03-29	2016	13	13	6290.37	3.79868	3.66466	11.6667	0	2.26717	4	10.42	10.5817	9.88191	76.6972	71.9883	75.8645	2.58654	3.46249	2.76642	2.64958	2.23265	3.02914	15.2083	15.5758	14.4067	64.1	59.7675	66.4417	5.56116	6.45619	4.76034
1615	low	1	2016-03-29	2016	13	13	6290.37	3.79868	3.66466	11.6667	1	2.26717	4	10.42	10.5817	9.88191	76.6972	71.9883	75.8645	2.58654	3.46249	2.76642	2.64958	2.23265	3.02914	15.2083	15.5758	14.4067	64.1	59.7675	66.4417	5.56116	6.45619	4.76034
1616	low	1	2016-03-29	2016	13	13	6290.37	3.79868	3.66466	11.6667	0	2.26717	4	10.42	10.5817	9.88191	76.6972	71.9883	75.8645	2.58654	3.46249	2.76642	2.64958	2.23265	3.02914	15.2083	15.5758	14.4067	64.1	59.7675	66.4417	5.56116	6.45619	4.76034
1617	low	1	2016-03-29	2016	13	13	6290.37	3.79868	3.66466	11.6667	1	2.26717	4	10.42	10.5817	9.88191	76.6972	71.9883	75.8645	2.58654	3.46249	2.76642	2.64958	2.23265	3.02914	15.2083	15.5758	14.4067	64.1	59.7675	66.4417	5.56116	6.45619	4.76034
1618	low	1	2016-03-29	2016	13	13	6290.37	3.79868	3.66466	11.6667	0	2.26717	4	10.42	10.5817	9.88191	76.6972	71.9883	75.8645	2.58654	3.46249	2.76642	2.64958	2.23265	3.02914	15.2083	15.5758	14.4067	64.1	59.7675	66.4417	5.56116	6.45619	4.76034
1619	low	1	2016-03-29	2016	13	13	6290.37	3.79868	3.66466	11.6667	0	2.26717	4	10.42	10.5817	9.88191	76.6972	71.9883	75.8645	2.58654	3.46249	2.76642	2.64958	2.23265	3.02914	15.2083	15.5758	14.4067	64.1	59.7675	66.4417	5.56116	6.45619	4.76034
1620	low	1	2016-04-28	2016	13	13	6290.37	3.79868	3.66466	11.6667	0	2.22789	4	10.42	10.5817	9.88191	76.6972	71.9883	75.8645	2.58654	3.46249	2.76642	2.64958	2.23265	3.02914	15.2083	15.5758	14.4067	64.1	59.7675	66.4417	5.56116	6.45619	4.76034
1621	low	1	2016-04-28	2016	13	13	6290.37	3.79868	3.66466	11.6667	0	2.22789	4	10.42	10.5817	9.88191	76.6972	71.9883	75.8645	2.58654	3.46249	2.76642	2.64958	2.23265	3.02914	15.2083	15.5758	14.4067	64.1	59.7675	66.4417	5.56116	6.45619	4.76034
1622	low	1	2016-04-28	2016	13	13	6290.37	3.79868	3.66466	11.6667	0	2.22789	4	10.42	10.5817	9.88191	76.6972	71.9883	75.8645	2.58654	3.46249	2.76642	2.64958	2.23265	3.02914	15.2083	15.5758	14.4067	64.1	59.7675	66.4417	5.56116	6.45619	4.76034
1623	low	1	2016-04-28	2016	13	13	6290.37	3.79868	3.66466	11.6667	0	2.22789	4	10.42	10.5817	9.88191	76.6972	71.9883	75.8645	2.58654	3.46249	2.76642	2.64958	2.23265	3.02914	15.2083	15.5758	14.4067	64.1	59.7675	66.4417	5.56116	6.45619	4.76034
1624	low	1	2016-04-28	2016	13	13	6290.37	3.79868	3.66466	11.6667	0	2.22789	4	10.42	10.5817	9.88191	76.6972	71.9883	75.8645	2.58654	3.46249	2.76642	2.64958	2.23265	3.02914	15.2083	15.5758	14.4067	64.1	59.7675	66.4417	5.56116	6.45619	4.76034
1625	low	1	2016-04-28	2016	13	13	6290.37	3.79868	3.66466	11.6667	0	2.22789	4	10.42	10.5817	9.88191	76.6972	71.9883	75.8645	2.58654	3.46249	2.76642	2.64958	2.23265	3.02914	15.2083	15.5758	14.4067	64.1	59.7675	66.4417	5.56116	6.45619	4.76034
1626	low	1	2016-04-28	2016	13	13	6290.37	3.79868	3.66466	11.6667	0	2.22789	4	10.42	10.5817	9.88191	76.6972	71.9883	75.8645	2.58654	3.46249	2.76642	2.64958	2.23265	3.02914	15.2083	15.5758	14.4067	64.1	59.7675	66.4417	5.56116	6.45619	4.76034
1627	low	1	2016-04-28	2016	13	13	6290.37	3.79868	3.66466	11.6667	0	2.22789	4	10.42	10.5817	9.88191	76.6972	71.9883	75.8645	2.58654	3.46249	2.76642	2.64958	2.23265	3.02914	15.2083	15.5758	14.4067	64.1	59.7675	66.4417	5.56116	6.45619	4.76034
1628	low	1	2016-04-28	2016	13	13	6290.37	3.79868	3.66466	11.6667	0	2.22789	4	10.42	10.5817	9.88191	76.6972	71.9883	75.8645	2.58654	3.46249	2.76642	2.64958	2.23265	3.02914	15.2083	15.5758	14.4067	64.1	59.7675	66.4417	5.56116	6.45619	4.76034
1629	low	1	2016-04-28	2016	13	13	6290.37	3.79868	3.66466	11.6667	0	2.22789	4	10.42	10.5817	9.88191	76.6972	71.9883	75.8645	2.58654	3.46249	2.76642	2.64958	2.23265	3.02914	15.2083	15.5758	14.4067	64.1	59.7675	66.4417	5.56116	6.45619	4.76034
1630	low	1	2016-04-28	2016	13	13	6290.37	3.79868	3.66466	11.6667	0	2.22789	4	10.42	10.5817	9.88191	76.6972	71.9883	75.8645	2.58654	3.46249	2.76642	2.64958	2.23265	3.02914	15.2083	15.5758	14.4067	64.1	59.7675	66.4417	5.56116	6.45619	4.76034
1631	low	1	2016-04-28	2016	13	13	6290.37	3.79868	3.66466	11.6667	0	2.22789	4	10.42	10.5817	9.88191	76.6972	71.9883	75.8645	2.58654	3.46249	2.76642	2.64958	2.23265	3.02914	15.2083	15.5758	14.4067	64.1	59.7675	66.4417	5.56116	6.45619	4.76034
1632	low	1	2016-04-28	2016	13	13	6290.37	3.79868	3.66466	11.6667	0	2.22789	4	10.42	10.5817	9.88191	76.6972	71.9883	75.8645	2.58654	3.46249	2.76642	2.64958	2.23265	3.02914	15.2083	15.5758	14.4067	64.1	59.7675	66.4417	5.56116	6.45619	4.76034
1633	low	1	2016-04-28	2016	13	13	6290.37	3.79868	3.66466	11.6667	0	2.22789	4	10.42	10.5817	9.88191	76.6972	71.9883	75.8645	2.58654	3.46249	2.76642	2.64958	2.23265	3.02914	15.2083	15.5758	14.4067	64.1	59.7675	66.4417	5.56116	6.45619	4.76034
1634	low	1	2016-04-28	2016	13	13	6290.37	3.79868	3.66466	11.6667	0	2.22789	4	10.42	10.5817	9.88191	76.6972	71.9883	75.8645	2.58654	3.46249	2.76642	2.64958	2.23265	3.02914	15.2083	15.5758	14.4067	64.1	59.7675	66.4417	5.56116	6.45619	4.76034
1635	low	1	2016-04-28	2016	13	13	6290.37	3.79868	3.66466	11.6667	0	2.22789	4	10.42	10.5817	9.88191	76.6972	71.9883	75.8645	2.58654	3.46249	2.76642	2.64958	2.23265	3.02914	15.2083	15.5758	14.4067	64.1	59.7675	66.4417	5.56116	6.45619	4.76034
1636	low	1	2016-04-28	2016	13	13	6290.37	3.79868	3.66466	11.6667	0	2.22789	4	10.42	10.5817	9.88191	76.6972	71.9883	75.8645	2.58654	3.46249	2.76642	2.64958	2.23265	3.02914	15.2083	15.5758	14.4067	64.1	59.7675	66.4417	5.56116	6.45619	4.76034
1637	low	1	2016-04-28	2016	13	13	6290.37	3.79868	3.66466	11.6667	0	2.22789	4	10.42	10.5817	9.88191	76.6972	71.9883	75.8645	2.58654	3.46249	2.76642	2.64958	2.23265	3.02914	15.2083	15.5758	14.4067	64.1	59.7675	66.4417	5.56116	6.45619	4.76034
1638	low	1	2016-04-28	2016	13	13	6290.37	3.79868	3.66466	11.6667	1	2.22789	4	10.42	10.5817	9.88191	76.6972	71.9883	75.8645	2.58654	3.46249	2.76642	2.64958	2.23265	3.02914	15.2083	15.5758	14.4067	64.1	59.7675	66.4417	5.56116	6.45619	4.76034
1639	low	1	2016-04-28	2016	13	13	6290.37	3.79868	3.66466	11.6667	0	2.22789	4	10.42	10.5817	9.88191	76.6972	71.9883	75.8645	2.58654	3.46249	2.76642	2.64958	2.23265	3.02914	15.2083	15.5758	14.4067	64.1	59.7675	66.4417	5.56116	6.45619	4.76034
1640	low	1	2016-05-25	2016	13	13	6290.37	3.79868	3.66466	11.6667	0	2.32222	4	10.42	10.5817	9.88191	76.6972	71.9883	75.8645	2.58654	3.46249	2.76642	2.64958	2.23265	3.02914	15.2083	15.5758	14.4067	64.1	59.7675	66.4417	5.56116	6.45619	4.76034
1641	low	1	2016-05-25	2016	13	13	6290.37	3.79868	3.66466	11.6667	0	2.32222	4	10.42	10.5817	9.88191	76.6972	71.9883	75.8645	2.58654	3.46249	2.76642	2.64958	2.23265	3.02914	15.2083	15.5758	14.4067	64.1	59.7675	66.4417	5.56116	6.45619	4.76034
1642	low	1	2016-05-25	2016	13	13	6290.37	3.79868	3.66466	11.6667	0	2.32222	4	10.42	10.5817	9.88191	76.6972	71.9883	75.8645	2.58654	3.46249	2.76642	2.64958	2.23265	3.02914	15.2083	15.5758	14.4067	64.1	59.7675	66.4417	5.56116	6.45619	4.76034
1643	low	1	2016-05-25	2016	13	13	6290.37	3.79868	3.66466	11.6667	0	2.32222	4	10.42	10.5817	9.88191	76.6972	71.9883	75.8645	2.58654	3.46249	2.76642	2.64958	2.23265	3.02914	15.2083	15.5758	14.4067	64.1	59.7675	66.4417	5.56116	6.45619	4.76034
1644	low	1	2016-05-25	2016	13	13	6290.37	3.79868	3.66466	11.6667	0	2.32222	4	10.42	10.5817	9.88191	76.6972	71.9883	75.8645	2.58654	3.46249	2.76642	2.64958	2.23265	3.02914	15.2083	15.5758	14.4067	64.1	59.7675	66.4417	5.56116	6.45619	4.76034
1645	low	1	2016-05-25	2016	13	13	6290.37	3.79868	3.66466	11.6667	0	2.32222	4	10.42	10.5817	9.88191	76.6972	71.9883	75.8645	2.58654	3.46249	2.76642	2.64958	2.23265	3.02914	15.2083	15.5758	14.4067	64.1	59.7675	66.4417	5.56116	6.45619	4.76034
1646	low	1	2016-05-25	2016	13	13	6290.37	3.79868	3.66466	11.6667	0	2.32222	4	10.42	10.5817	9.88191	76.6972	71.9883	75.8645	2.58654	3.46249	2.76642	2.64958	2.23265	3.02914	15.2083	15.5758	14.4067	64.1	59.7675	66.4417	5.56116	6.45619	4.76034
1647	low	1	2016-05-25	2016	13	13	6290.37	3.79868	3.66466	11.6667	0	2.32222	4	10.42	10.5817	9.88191	76.6972	71.9883	75.8645	2.58654	3.46249	2.76642	2.64958	2.23265	3.02914	15.2083	15.5758	14.4067	64.1	59.7675	66.4417	5.56116	6.45619	4.76034
1648	low	1	2016-05-25	2016	13	13	6290.37	3.79868	3.66466	11.6667	0	2.32222	4	10.42	10.5817	9.88191	76.6972	71.9883	75.8645	2.58654	3.46249	2.76642	2.64958	2.23265	3.02914	15.2083	15.5758	14.4067	64.1	59.7675	66.4417	5.56116	6.45619	4.76034
1649	low	1	2016-05-25	2016	13	13	6290.37	3.79868	3.66466	11.6667	0	2.32222	4	10.42	10.5817	9.88191	76.6972	71.9883	75.8645	2.58654	3.46249	2.76642	2.64958	2.23265	3.02914	15.2083	15.5758	14.4067	64.1	59.7675	66.4417	5.56116	6.45619	4.76034
1650	low	1	2016-05-25	2016	13	13	6290.37	3.79868	3.66466	11.6667	0	2.32222	4	10.42	10.5817	9.88191	76.6972	71.9883	75.8645	2.58654	3.46249	2.76642	2.64958	2.23265	3.02914	15.2083	15.5758	14.4067	64.1	59.7675	66.4417	5.56116	6.45619	4.76034
1651	low	1	2016-05-25	2016	13	13	6290.37	3.79868	3.66466	11.6667	0	2.32222	4	10.42	10.5817	9.88191	76.6972	71.9883	75.8645	2.58654	3.46249	2.76642	2.64958	2.23265	3.02914	15.2083	15.5758	14.4067	64.1	59.7675	66.4417	5.56116	6.45619	4.76034
1652	low	1	2016-05-25	2016	13	13	6290.37	3.79868	3.66466	11.6667	1	2.32222	4	10.42	10.5817	9.88191	76.6972	71.9883	75.8645	2.58654	3.46249	2.76642	2.64958	2.23265	3.02914	15.2083	15.5758	14.4067	64.1	59.7675	66.4417	5.56116	6.45619	4.76034
1653	low	1	2016-05-25	2016	13	13	6290.37	3.79868	3.66466	11.6667	0	2.32222	4	10.42	10.5817	9.88191	76.6972	71.9883	75.8645	2.58654	3.46249	2.76642	2.64958	2.23265	3.02914	15.2083	15.5758	14.4067	64.1	59.7675	66.4417	5.56116	6.45619	4.76034
1654	low	1	2016-05-25	2016	13	13	6290.37	3.79868	3.66466	11.6667	0	2.32222	4	10.42	10.5817	9.88191	76.6972	71.9883	75.8645	2.58654	3.46249	2.76642	2.64958	2.23265	3.02914	15.2083	15.5758	14.4067	64.1	59.7675	66.4417	5.56116	6.45619	4.76034
1655	low	1	2016-05-25	2016	13	13	6290.37	3.79868	3.66466	11.6667	0	2.32222	4	10.42	10.5817	9.88191	76.6972	71.9883	75.8645	2.58654	3.46249	2.76642	2.64958	2.23265	3.02914	15.2083	15.5758	14.4067	64.1	59.7675	66.4417	5.56116	6.45619	4.76034
1656	low	1	2016-05-25	2016	13	13	6290.37	3.79868	3.66466	11.6667	1	2.32222	4	10.42	10.5817	9.88191	76.6972	71.9883	75.8645	2.58654	3.46249	2.76642	2.64958	2.23265	3.02914	15.2083	15.5758	14.4067	64.1	59.7675	66.4417	5.56116	6.45619	4.76034
1657	low	1	2016-05-25	2016	13	13	6290.37	3.79868	3.66466	11.6667	0	2.32222	4	10.42	10.5817	9.88191	76.6972	71.9883	75.8645	2.58654	3.46249	2.76642	2.64958	2.23265	3.02914	15.2083	15.5758	14.4067	64.1	59.7675	66.4417	5.56116	6.45619	4.76034
1658	low	1	2016-05-25	2016	13	13	6290.37	3.79868	3.66466	11.6667	0	2.32222	4	10.42	10.5817	9.88191	76.6972	71.9883	75.8645	2.58654	3.46249	2.76642	2.64958	2.23265	3.02914	15.2083	15.5758	14.4067	64.1	59.7675	66.4417	5.56116	6.45619	4.76034
1659	low	1	2016-05-25	2016	13	13	6290.37	3.79868	3.66466	11.6667	0	2.32222	4	10.42	10.5817	9.88191	76.6972	71.9883	75.8645	2.58654	3.46249	2.76642	2.64958	2.23265	3.02914	15.2083	15.5758	14.4067	64.1	59.7675	66.4417	5.56116	6.45619	4.76034
1660	low	1	2016-07-06	2016	13	13	6290.37	3.79868	3.66466	11.6667	0	2.29667	4	10.42	10.5817	9.88191	76.6972	71.9883	75.8645	2.58654	3.46249	2.76642	2.64958	2.23265	3.02914	15.2083	15.5758	14.4067	64.1	59.7675	66.4417	5.56116	6.45619	4.76034
1661	low	1	2016-07-06	2016	13	13	6290.37	3.79868	3.66466	11.6667	0	2.29667	4	10.42	10.5817	9.88191	76.6972	71.9883	75.8645	2.58654	3.46249	2.76642	2.64958	2.23265	3.02914	15.2083	15.5758	14.4067	64.1	59.7675	66.4417	5.56116	6.45619	4.76034
1662	low	1	2016-07-06	2016	13	13	6290.37	3.79868	3.66466	11.6667	0	2.29667	4	10.42	10.5817	9.88191	76.6972	71.9883	75.8645	2.58654	3.46249	2.76642	2.64958	2.23265	3.02914	15.2083	15.5758	14.4067	64.1	59.7675	66.4417	5.56116	6.45619	4.76034
1663	low	1	2016-07-06	2016	13	13	6290.37	3.79868	3.66466	11.6667	0	2.29667	4	10.42	10.5817	9.88191	76.6972	71.9883	75.8645	2.58654	3.46249	2.76642	2.64958	2.23265	3.02914	15.2083	15.5758	14.4067	64.1	59.7675	66.4417	5.56116	6.45619	4.76034
1664	low	1	2016-07-06	2016	13	13	6290.37	3.79868	3.66466	11.6667	1	2.29667	4	10.42	10.5817	9.88191	76.6972	71.9883	75.8645	2.58654	3.46249	2.76642	2.64958	2.23265	3.02914	15.2083	15.5758	14.4067	64.1	59.7675	66.4417	5.56116	6.45619	4.76034
1665	low	1	2016-07-06	2016	13	13	6290.37	3.79868	3.66466	11.6667	0	2.29667	4	10.42	10.5817	9.88191	76.6972	71.9883	75.8645	2.58654	3.46249	2.76642	2.64958	2.23265	3.02914	15.2083	15.5758	14.4067	64.1	59.7675	66.4417	5.56116	6.45619	4.76034
1666	low	1	2016-07-06	2016	13	13	6290.37	3.79868	3.66466	11.6667	0	2.29667	4	10.42	10.5817	9.88191	76.6972	71.9883	75.8645	2.58654	3.46249	2.76642	2.64958	2.23265	3.02914	15.2083	15.5758	14.4067	64.1	59.7675	66.4417	5.56116	6.45619	4.76034
1667	low	1	2016-07-06	2016	13	13	6290.37	3.79868	3.66466	11.6667	1	2.29667	4	10.42	10.5817	9.88191	76.6972	71.9883	75.8645	2.58654	3.46249	2.76642	2.64958	2.23265	3.02914	15.2083	15.5758	14.4067	64.1	59.7675	66.4417	5.56116	6.45619	4.76034
1668	low	1	2016-07-06	2016	13	13	6290.37	3.79868	3.66466	11.6667	1	2.29667	4	10.42	10.5817	9.88191	76.6972	71.9883	75.8645	2.58654	3.46249	2.76642	2.64958	2.23265	3.02914	15.2083	15.5758	14.4067	64.1	59.7675	66.4417	5.56116	6.45619	4.76034
1669	low	1	2016-07-06	2016	13	13	6290.37	3.79868	3.66466	11.6667	0	2.29667	4	10.42	10.5817	9.88191	76.6972	71.9883	75.8645	2.58654	3.46249	2.76642	2.64958	2.23265	3.02914	15.2083	15.5758	14.4067	64.1	59.7675	66.4417	5.56116	6.45619	4.76034
1670	low	1	2016-07-06	2016	13	13	6290.37	3.79868	3.66466	11.6667	0	2.29667	4	10.42	10.5817	9.88191	76.6972	71.9883	75.8645	2.58654	3.46249	2.76642	2.64958	2.23265	3.02914	15.2083	15.5758	14.4067	64.1	59.7675	66.4417	5.56116	6.45619	4.76034
1671	low	1	2016-07-06	2016	13	13	6290.37	3.79868	3.66466	11.6667	0	2.29667	4	10.42	10.5817	9.88191	76.6972	71.9883	75.8645	2.58654	3.46249	2.76642	2.64958	2.23265	3.02914	15.2083	15.5758	14.4067	64.1	59.7675	66.4417	5.56116	6.45619	4.76034
1672	low	1	2016-07-06	2016	13	13	6290.37	3.79868	3.66466	11.6667	0	2.29667	4	10.42	10.5817	9.88191	76.6972	71.9883	75.8645	2.58654	3.46249	2.76642	2.64958	2.23265	3.02914	15.2083	15.5758	14.4067	64.1	59.7675	66.4417	5.56116	6.45619	4.76034
1673	low	1	2016-07-06	2016	13	13	6290.37	3.79868	3.66466	11.6667	0	2.29667	4	10.42	10.5817	9.88191	76.6972	71.9883	75.8645	2.58654	3.46249	2.76642	2.64958	2.23265	3.02914	15.2083	15.5758	14.4067	64.1	59.7675	66.4417	5.56116	6.45619	4.76034
1674	low	1	2016-07-06	2016	13	13	6290.37	3.79868	3.66466	11.6667	0	2.29667	4	10.42	10.5817	9.88191	76.6972	71.9883	75.8645	2.58654	3.46249	2.76642	2.64958	2.23265	3.02914	15.2083	15.5758	14.4067	64.1	59.7675	66.4417	5.56116	6.45619	4.76034
1675	low	1	2016-07-06	2016	13	13	6290.37	3.79868	3.66466	11.6667	0	2.29667	4	10.42	10.5817	9.88191	76.6972	71.9883	75.8645	2.58654	3.46249	2.76642	2.64958	2.23265	3.02914	15.2083	15.5758	14.4067	64.1	59.7675	66.4417	5.56116	6.45619	4.76034
1676	low	1	2016-07-06	2016	13	13	6290.37	3.79868	3.66466	11.6667	0	2.29667	4	10.42	10.5817	9.88191	76.6972	71.9883	75.8645	2.58654	3.46249	2.76642	2.64958	2.23265	3.02914	15.2083	15.5758	14.4067	64.1	59.7675	66.4417	5.56116	6.45619	4.76034
1677	low	1	2016-07-06	2016	13	13	6290.37	3.79868	3.66466	11.6667	0	2.29667	4	10.42	10.5817	9.88191	76.6972	71.9883	75.8645	2.58654	3.46249	2.76642	2.64958	2.23265	3.02914	15.2083	15.5758	14.4067	64.1	59.7675	66.4417	5.56116	6.45619	4.76034
1678	low	1	2016-07-06	2016	13	13	6290.37	3.79868	3.66466	11.6667	0	2.29667	4	10.42	10.5817	9.88191	76.6972	71.9883	75.8645	2.58654	3.46249	2.76642	2.64958	2.23265	3.02914	15.2083	15.5758	14.4067	64.1	59.7675	66.4417	5.56116	6.45619	4.76034
1679	low	1	2016-07-06	2016	13	13	6290.37	3.79868	3.66466	11.6667	1	2.29667	4	10.42	10.5817	9.88191	76.6972	71.9883	75.8645	2.58654	3.46249	2.76642	2.64958	2.23265	3.02914	15.2083	15.5758	14.4067	64.1	59.7675	66.4417	5.56116	6.45619	4.76034
1680	low	1	2016-07-25	2016	13	13	6290.37	3.79868	3.66466	11.6667	0	2.31175	4	10.42	10.5817	9.88191	76.6972	71.9883	75.8645	2.58654	3.46249	2.76642	2.64958	2.23265	3.02914	15.2083	15.5758	14.4067	64.1	59.7675	66.4417	5.56116	6.45619	4.76034
1681	low	1	2016-07-25	2016	13	13	6290.37	3.79868	3.66466	11.6667	0	2.31175	4	10.42	10.5817	9.88191	76.6972	71.9883	75.8645	2.58654	3.46249	2.76642	2.64958	2.23265	3.02914	15.2083	15.5758	14.4067	64.1	59.7675	66.4417	5.56116	6.45619	4.76034
1682	low	1	2016-07-25	2016	13	13	6290.37	3.79868	3.66466	11.6667	0	2.31175	4	10.42	10.5817	9.88191	76.6972	71.9883	75.8645	2.58654	3.46249	2.76642	2.64958	2.23265	3.02914	15.2083	15.5758	14.4067	64.1	59.7675	66.4417	5.56116	6.45619	4.76034
1683	low	1	2016-07-25	2016	13	13	6290.37	3.79868	3.66466	11.6667	0	2.31175	4	10.42	10.5817	9.88191	76.6972	71.9883	75.8645	2.58654	3.46249	2.76642	2.64958	2.23265	3.02914	15.2083	15.5758	14.4067	64.1	59.7675	66.4417	5.56116	6.45619	4.76034
1684	low	1	2016-07-25	2016	13	13	6290.37	3.79868	3.66466	11.6667	0	2.31175	4	10.42	10.5817	9.88191	76.6972	71.9883	75.8645	2.58654	3.46249	2.76642	2.64958	2.23265	3.02914	15.2083	15.5758	14.4067	64.1	59.7675	66.4417	5.56116	6.45619	4.76034
1685	low	1	2016-07-25	2016	13	13	6290.37	3.79868	3.66466	11.6667	0	2.31175	4	10.42	10.5817	9.88191	76.6972	71.9883	75.8645	2.58654	3.46249	2.76642	2.64958	2.23265	3.02914	15.2083	15.5758	14.4067	64.1	59.7675	66.4417	5.56116	6.45619	4.76034
1686	low	1	2016-07-25	2016	13	13	6290.37	3.79868	3.66466	11.6667	0	2.31175	4	10.42	10.5817	9.88191	76.6972	71.9883	75.8645	2.58654	3.46249	2.76642	2.64958	2.23265	3.02914	15.2083	15.5758	14.4067	64.1	59.7675	66.4417	5.56116	6.45619	4.76034
1687	low	1	2016-07-25	2016	13	13	6290.37	3.79868	3.66466	11.6667	0	2.31175	4	10.42	10.5817	9.88191	76.6972	71.9883	75.8645	2.58654	3.46249	2.76642	2.64958	2.23265	3.02914	15.2083	15.5758	14.4067	64.1	59.7675	66.4417	5.56116	6.45619	4.76034
1688	low	1	2016-07-25	2016	13	13	6290.37	3.79868	3.66466	11.6667	0	2.31175	4	10.42	10.5817	9.88191	76.6972	71.9883	75.8645	2.58654	3.46249	2.76642	2.64958	2.23265	3.02914	15.2083	15.5758	14.4067	64.1	59.7675	66.4417	5.56116	6.45619	4.76034
1689	low	1	2016-07-25	2016	13	13	6290.37	3.79868	3.66466	11.6667	0	2.31175	4	10.42	10.5817	9.88191	76.6972	71.9883	75.8645	2.58654	3.46249	2.76642	2.64958	2.23265	3.02914	15.2083	15.5758	14.4067	64.1	59.7675	66.4417	5.56116	6.45619	4.76034
1690	low	1	2016-07-25	2016	13	13	6290.37	3.79868	3.66466	11.6667	0	2.31175	4	10.42	10.5817	9.88191	76.6972	71.9883	75.8645	2.58654	3.46249	2.76642	2.64958	2.23265	3.02914	15.2083	15.5758	14.4067	64.1	59.7675	66.4417	5.56116	6.45619	4.76034
1691	low	1	2016-07-25	2016	13	13	6290.37	3.79868	3.66466	11.6667	0	2.31175	4	10.42	10.5817	9.88191	76.6972	71.9883	75.8645	2.58654	3.46249	2.76642	2.64958	2.23265	3.02914	15.2083	15.5758	14.4067	64.1	59.7675	66.4417	5.56116	6.45619	4.76034
1692	low	1	2016-07-25	2016	13	13	6290.37	3.79868	3.66466	11.6667	0	2.31175	4	10.42	10.5817	9.88191	76.6972	71.9883	75.8645	2.58654	3.46249	2.76642	2.64958	2.23265	3.02914	15.2083	15.5758	14.4067	64.1	59.7675	66.4417	5.56116	6.45619	4.76034
1693	low	1	2016-07-25	2016	13	13	6290.37	3.79868	3.66466	11.6667	0	2.31175	4	10.42	10.5817	9.88191	76.6972	71.9883	75.8645	2.58654	3.46249	2.76642	2.64958	2.23265	3.02914	15.2083	15.5758	14.4067	64.1	59.7675	66.4417	5.56116	6.45619	4.76034
1694	low	1	2016-07-25	2016	13	13	6290.37	3.79868	3.66466	11.6667	0	2.31175	4	10.42	10.5817	9.88191	76.6972	71.9883	75.8645	2.58654	3.46249	2.76642	2.64958	2.23265	3.02914	15.2083	15.5758	14.4067	64.1	59.7675	66.4417	5.56116	6.45619	4.76034
1695	low	1	2016-07-25	2016	13	13	6290.37	3.79868	3.66466	11.6667	0	2.31175	4	10.42	10.5817	9.88191	76.6972	71.9883	75.8645	2.58654	3.46249	2.76642	2.64958	2.23265	3.02914	15.2083	15.5758	14.4067	64.1	59.7675	66.4417	5.56116	6.45619	4.76034
1696	low	1	2016-07-25	2016	13	13	6290.37	3.79868	3.66466	11.6667	0	2.31175	4	10.42	10.5817	9.88191	76.6972	71.9883	75.8645	2.58654	3.46249	2.76642	2.64958	2.23265	3.02914	15.2083	15.5758	14.4067	64.1	59.7675	66.4417	5.56116	6.45619	4.76034
1697	low	1	2016-07-25	2016	13	13	6290.37	3.79868	3.66466	11.6667	0	2.31175	4	10.42	10.5817	9.88191	76.6972	71.9883	75.8645	2.58654	3.46249	2.76642	2.64958	2.23265	3.02914	15.2083	15.5758	14.4067	64.1	59.7675	66.4417	5.56116	6.45619	4.76034
1698	low	1	2016-07-25	2016	13	13	6290.37	3.79868	3.66466	11.6667	0	2.31175	4	10.42	10.5817	9.88191	76.6972	71.9883	75.8645	2.58654	3.46249	2.76642	2.64958	2.23265	3.02914	15.2083	15.5758	14.4067	64.1	59.7675	66.4417	5.56116	6.45619	4.76034
1699	low	1	2016-07-25	2016	13	13	6290.37	3.79868	3.66466	11.6667	0	2.31175	4	10.42	10.5817	9.88191	76.6972	71.9883	75.8645	2.58654	3.46249	2.76642	2.64958	2.23265	3.02914	15.2083	15.5758	14.4067	64.1	59.7675	66.4417	5.56116	6.45619	4.76034
1700	low	1	2016-08-25	2016	13	13	6290.37	3.79868	3.66466	11.6667	0	2.30963	4	10.42	10.5817	9.88191	76.6972	71.9883	75.8645	2.58654	3.46249	2.76642	2.64958	2.23265	3.02914	15.2083	15.5758	14.4067	64.1	59.7675	66.4417	5.56116	6.45619	4.76034
1701	low	1	2016-08-25	2016	13	13	6290.37	3.79868	3.66466	11.6667	0	2.30963	4	10.42	10.5817	9.88191	76.6972	71.9883	75.8645	2.58654	3.46249	2.76642	2.64958	2.23265	3.02914	15.2083	15.5758	14.4067	64.1	59.7675	66.4417	5.56116	6.45619	4.76034
1702	low	1	2016-08-25	2016	13	13	6290.37	3.79868	3.66466	11.6667	0	2.30963	4	10.42	10.5817	9.88191	76.6972	71.9883	75.8645	2.58654	3.46249	2.76642	2.64958	2.23265	3.02914	15.2083	15.5758	14.4067	64.1	59.7675	66.4417	5.56116	6.45619	4.76034
1703	low	1	2016-08-25	2016	13	13	6290.37	3.79868	3.66466	11.6667	0	2.30963	4	10.42	10.5817	9.88191	76.6972	71.9883	75.8645	2.58654	3.46249	2.76642	2.64958	2.23265	3.02914	15.2083	15.5758	14.4067	64.1	59.7675	66.4417	5.56116	6.45619	4.76034
1704	low	1	2016-08-25	2016	13	13	6290.37	3.79868	3.66466	11.6667	0	2.30963	4	10.42	10.5817	9.88191	76.6972	71.9883	75.8645	2.58654	3.46249	2.76642	2.64958	2.23265	3.02914	15.2083	15.5758	14.4067	64.1	59.7675	66.4417	5.56116	6.45619	4.76034
1705	low	1	2016-08-25	2016	13	13	6290.37	3.79868	3.66466	11.6667	0	2.30963	4	10.42	10.5817	9.88191	76.6972	71.9883	75.8645	2.58654	3.46249	2.76642	2.64958	2.23265	3.02914	15.2083	15.5758	14.4067	64.1	59.7675	66.4417	5.56116	6.45619	4.76034
1706	low	1	2016-08-25	2016	13	13	6290.37	3.79868	3.66466	11.6667	0	2.30963	4	10.42	10.5817	9.88191	76.6972	71.9883	75.8645	2.58654	3.46249	2.76642	2.64958	2.23265	3.02914	15.2083	15.5758	14.4067	64.1	59.7675	66.4417	5.56116	6.45619	4.76034
[truncated: 5,217 more rows]

## Sheet: Index_NIP
Variable name	Description
[truncated: 35 more rows]

[truncated: 6 more sheets: DIN, Index_DIN, AIP, Index_AIP, DIA, Index_DIA]
